# Supplementary material for: Association Rule Mining and In silico Analysis of Ethiopian Traditional Medicine Prescription
Source: Research Square preprint supplement (doi:10.21203/rs.3.rs-4652485/v1), 2024-07-25
Supplement: Supplementary file 1 [file 63b727a8c486dc396b7517f5.xlsx]

## Sheet: Disesase-target-compound
Association Rule Mining and In silico Analysis of Ethiopian Traditional Medicine Prescription Lemessa Etana Bultum1,2,3*, Gwangmin Kim1,2 , Seon-Woo Lee 3, and Doheon Lee1,2* 1Department of Bio and Brain Engineering, Korea Advanced Institute of Science and Technology (KAIST), 291Daehak-ro, Daejeon 34141, South Korea. 2Bio-Synergy Research Center, 291Daehak-ro, 34141 Daejeon, South Korea. 3Institu…
Disease category	Disease	Target	Compound
Cancer	Acute leukemia	ACCS	chrysophanol
Cancer	Acute leukemia	AGPS	chrysophanol
Cancer	Acute leukemia	ALDH1A1	chrysophanol
Cancer	Acute leukemia	ARF4	chrysophanol
Cancer	Acute leukemia	ARL10	chrysophanol
Cancer	Acute leukemia	ARL17A	chrysophanol
Cancer	Acute leukemia	ARL4A	chrysophanol
Cancer	Acute leukemia	ARL4C	chrysophanol
Cancer	Acute leukemia	ARL5B	chrysophanol
Cancer	Acute leukemia	CCDC80	chrysophanol
Cancer	Acute leukemia	CTSG	chrysophanol
Cancer	Acute leukemia	CTSG	chrysophanol
Cancer	Acute leukemia	DNAJC27	chrysophanol
Cancer	Acute leukemia	GART	chrysophanol
Cancer	Acute leukemia	GPT2	chrysophanol
Cancer	Acute leukemia	IPP	chrysophanol
Cancer	Acute leukemia	MAPK1	chrysophanol
Cancer	Acute leukemia	MGAM	chrysophanol
Cancer	Acute leukemia	MRAS	chrysophanol
Cancer	Acute leukemia	MRRF	chrysophanol
Cancer	Acute leukemia	NLRP3	chrysophanol
Cancer	Acute leukemia	RAB25	chrysophanol
Cancer	Acute leukemia	RASD1	chrysophanol
Cancer	Acute leukemia	RHEBL1	chrysophanol
Cancer	Acute leukemia	RHOB	chrysophanol
Cancer	Acute leukemia	RHOBTB3	chrysophanol
Cancer	Acute leukemia	RHOD	chrysophanol
Cancer	Acute leukemia	RND2	chrysophanol
Cancer	Acute leukemia	RND3	chrysophanol
Cancer	Acute leukemia	SLCO1B1	chrysophanol
Cancer	Acute leukemia	SLCO1B1	chrysophanol
Cancer	Acute leukemia	SLCO1B3	chrysophanol
Cancer	Acute leukemia	SLCO1B3	chrysophanol
Cancer	Acute leukemia	TDP1	chrysophanol
Cancer	Acute leukemia	TMPRSS11D	chrysophanol
Cancer	Acute leukemia	TRIM23	chrysophanol
Cancer	Acute leukemia	TSHR	chrysophanol
Cancer	Acute leukemia	ACR	citreorosein
Cancer	Acute leukemia	ATP5IF1	citreorosein
Cancer	Acute leukemia	C1RL	citreorosein
Cancer	Acute leukemia	CFI	citreorosein
Cancer	Acute leukemia	CTSG	citreorosein
Cancer	Acute leukemia	CTSG	citreorosein
Cancer	Acute leukemia	GZMB	citreorosein
Cancer	Acute leukemia	GZMK	citreorosein
Cancer	Acute leukemia	HGF	citreorosein
Cancer	Acute leukemia	KLK11	citreorosein
Cancer	Acute leukemia	KLK2	citreorosein
Cancer	Acute leukemia	KLK3	citreorosein
Cancer	Acute leukemia	PLPP2	citreorosein
Cancer	Acute leukemia	PLPP3	citreorosein
Cancer	Acute leukemia	PRSS21	citreorosein
Cancer	Acute leukemia	PRSS33	citreorosein
Cancer	Acute leukemia	PRTN3	citreorosein
Cancer	Acute leukemia	SGPP1	citreorosein
Cancer	Acute leukemia	SIDT2	citreorosein
Cancer	Acute leukemia	SLC25A29	citreorosein
Cancer	Acute leukemia	SLC25A45	citreorosein
Cancer	Acute leukemia	TMPRSS11D	citreorosein
Cancer	Acute leukemia	TMPRSS4	citreorosein
Cancer	Acute leukemia	TPSAB1	citreorosein
Cancer	Acute leukemia	ACTA1	emodin
Cancer	Acute leukemia	ALDH1A1	emodin
Cancer	Acute leukemia	APOBEC3G	emodin
Cancer	Acute leukemia	BCL2A1	emodin
Cancer	Acute leukemia	BLM	emodin
Cancer	Acute leukemia	CBR3	emodin
Cancer	Acute leukemia	CBX1	emodin
Cancer	Acute leukemia	CCL20	emodin
Cancer	Acute leukemia	COPS5	emodin
Cancer	Acute leukemia	COQ10A	emodin
Cancer	Acute leukemia	CSNK2A2	emodin
Cancer	Acute leukemia	CSNK2A2	emodin
Cancer	Acute leukemia	CTSG	emodin
Cancer	Acute leukemia	CTSG	emodin
Cancer	Acute leukemia	CXCR4	emodin
Cancer	Acute leukemia	DHRS4L2	emodin
Cancer	Acute leukemia	DHRSX	emodin
Cancer	Acute leukemia	ERG	emodin
Cancer	Acute leukemia	FBXO42	emodin
Cancer	Acute leukemia	FGR	emodin
Cancer	Acute leukemia	FMO5	emodin
Cancer	Acute leukemia	FOXO1	emodin
Cancer	Acute leukemia	FOXO1	emodin
Cancer	Acute leukemia	GATA1	emodin
Cancer	Acute leukemia	GATA2	emodin
Cancer	Acute leukemia	GATA3	emodin
Cancer	Acute leukemia	GATA6	emodin
Cancer	Acute leukemia	GRB7	emodin
Cancer	Acute leukemia	HPGD	emodin
Cancer	Acute leukemia	ILKAP	emodin
Cancer	Acute leukemia	JAK2	emodin
Cancer	Acute leukemia	KCNH2	emodin
Cancer	Acute leukemia	KCNMA1	emodin
Cancer	Acute leukemia	KDM4A	emodin
Cancer	Acute leukemia	KLHDC3	emodin
Cancer	Acute leukemia	KLHDC9	emodin
Cancer	Acute leukemia	KRT19	emodin
Cancer	Acute leukemia	LCK	emodin
Cancer	Acute leukemia	LCK	emodin
Cancer	Acute leukemia	MACF1	emodin
Cancer	Acute leukemia	MAPK1	emodin
Cancer	Acute leukemia	MAPK13	emodin
Cancer	Acute leukemia	MAPKAPK5	emodin
Cancer	Acute leukemia	MAT2A	emodin
Cancer	Acute leukemia	MCM2	emodin
Cancer	Acute leukemia	MCM7	emodin
Cancer	Acute leukemia	MGAM	emodin
Cancer	Acute leukemia	MRAS	emodin
Cancer	Acute leukemia	NAE1	emodin
Cancer	Acute leukemia	NFKB1	emodin
Cancer	Acute leukemia	NID1	emodin
Cancer	Acute leukemia	NT5E	emodin
Cancer	Acute leukemia	PALMD	emodin
Cancer	Acute leukemia	PIK3CA	emodin
Cancer	Acute leukemia	PIM1	emodin
Cancer	Acute leukemia	PLK1	emodin
Cancer	Acute leukemia	PLPP2	emodin
Cancer	Acute leukemia	PLPP3	emodin
Cancer	Acute leukemia	PPARD	emodin
Cancer	Acute leukemia	PPEF1	emodin
Cancer	Acute leukemia	PPTC7	emodin
Cancer	Acute leukemia	PRDX6	emodin
Cancer	Acute leukemia	PRKAG1	emodin
Cancer	Acute leukemia	PRKD1	emodin
Cancer	Acute leukemia	PTGS1	emodin
Cancer	Acute leukemia	PTP4A3	emodin
Cancer	Acute leukemia	PTP4A3	emodin
Cancer	Acute leukemia	RASD1	emodin
Cancer	Acute leukemia	RCN2	emodin
Cancer	Acute leukemia	RDH11	emodin
Cancer	Acute leukemia	RGS4	emodin
Cancer	Acute leukemia	RIOK1	emodin
Cancer	Acute leukemia	SAFB	emodin
Cancer	Acute leukemia	SDC3	emodin
Cancer	Acute leukemia	SERPINE1	emodin
Cancer	Acute leukemia	SGK1	emodin
Cancer	Acute leukemia	SGPL1	emodin
Cancer	Acute leukemia	SGPP1	emodin
Cancer	Acute leukemia	SH3GL1	emodin
Cancer	Acute leukemia	SLC45A2	emodin
Cancer	Acute leukemia	SLCO1B1	emodin
Cancer	Acute leukemia	SLCO1B1	emodin
Cancer	Acute leukemia	SLCO1B3	emodin
Cancer	Acute leukemia	SLCO1B3	emodin
Cancer	Acute leukemia	SLIRP	emodin
Cancer	Acute leukemia	SPRED1	emodin
Cancer	Acute leukemia	TAOK3	emodin
Cancer	Acute leukemia	TDP1	emodin
Cancer	Acute leukemia	THRB	emodin
Cancer	Acute leukemia	TMEM63C	emodin
Cancer	Acute leukemia	TMPRSS11D	emodin
Cancer	Acute leukemia	TOP2B	emodin
Cancer	Acute leukemia	TRPS1	emodin
Cancer	Acute leukemia	TRPV1	emodin
Cancer	Acute leukemia	TSHR	emodin
Cancer	Acute leukemia	TWIST1	emodin
Cancer	Acute leukemia	TXNL4B	emodin
Cancer	Acute leukemia	TYW1	emodin
Cancer	Acute leukemia	UGT1A3	emodin
Cancer	Acute leukemia	ANGPT1	lupeol
Cancer	Acute leukemia	CPVL	lupeol
Cancer	Acute leukemia	IDI1	lupeol
Cancer	Acute leukemia	PMVK	lupeol
Cancer	Acute leukemia	PPEF1	lupeol
Cancer	Acute leukemia	TMPRSS11D	lupeol
Cancer	Acute leukemia	TP53I3	lupeol
Cancer	Acute leukemia	VAT1L	lupeol
Cancer	Acute leukemia	CBX1	oleanolic acid
Cancer	Acute leukemia	CETP	oleanolic acid
Cancer	Acute leukemia	CPVL	oleanolic acid
Cancer	Acute leukemia	F3	oleanolic acid
Cancer	Acute leukemia	ICAM1	oleanolic acid
Cancer	Acute leukemia	IDH1	oleanolic acid
Cancer	Acute leukemia	IDI1	oleanolic acid
Cancer	Acute leukemia	MET	oleanolic acid
Cancer	Acute leukemia	NAMPT	oleanolic acid
Cancer	Acute leukemia	NQO1	oleanolic acid
Cancer	Acute leukemia	PLK1	oleanolic acid
Cancer	Acute leukemia	PTGS1	oleanolic acid
Cancer	Acute leukemia	PTPN2	oleanolic acid
Cancer	Acute leukemia	PTPN2	oleanolic acid
Cancer	Acute leukemia	PTPN7	oleanolic acid
Cancer	Acute leukemia	PTPRE	oleanolic acid
Cancer	Acute leukemia	RAPGEF4	oleanolic acid
Cancer	Acute leukemia	RNASE3	oleanolic acid
Cancer	Acute leukemia	SLCO1B1	oleanolic acid
Cancer	Acute leukemia	SLCO1B1	oleanolic acid
Cancer	Acute leukemia	SLCO1B3	oleanolic acid
Cancer	Acute leukemia	SLCO1B3	oleanolic acid
Cancer	Acute leukemia	TDP1	oleanolic acid
Cancer	Acute leukemia	TP53I3	oleanolic acid
Cancer	Acute leukemia	UGT1A3	oleanolic acid
Cancer	Acute leukemia	UGT2B10	oleanolic acid
Cancer	Acute leukemia	VAT1L	oleanolic acid
Cancer	Acute leukemia	ALDH1A1	physcion
Cancer	Acute leukemia	CTSG	physcion
Cancer	Acute leukemia	CTSG	physcion
Cancer	Acute leukemia	CYP51A1	physcion
Cancer	Acute leukemia	FOXG1	physcion
Cancer	Acute leukemia	GLA	physcion
Cancer	Acute leukemia	HPGD	physcion
Cancer	Acute leukemia	KLHDC3	physcion
Cancer	Acute leukemia	LAMA1	physcion
Cancer	Acute leukemia	LCK	physcion
Cancer	Acute leukemia	MGAM	physcion
Cancer	Acute leukemia	SLCO1B1	physcion
Cancer	Acute leukemia	SLCO1B1	physcion
Cancer	Acute leukemia	SLCO1B3	physcion
Cancer	Acute leukemia	SLCO1B3	physcion
Cancer	Acute leukemia	THRB	physcion
Cancer	Acute leukemia	TNS1	physcion
Cancer	Acute leukemia	F13A1	stigmastane-3,6-dione
Cancer	Acute lymphocytic leukemia	AGPS	chrysophanol
Cancer	Acute lymphocytic leukemia	ALDH1A1	chrysophanol
Cancer	Acute lymphocytic leukemia	ARL17A	chrysophanol
Cancer	Acute lymphocytic leukemia	ARL5B	chrysophanol
Cancer	Acute lymphocytic leukemia	MRAS	chrysophanol
Cancer	Acute lymphocytic leukemia	RHOD	chrysophanol
Cancer	Acute lymphocytic leukemia	SLCO1B1	chrysophanol
Cancer	Acute lymphocytic leukemia	SLCO1B1	chrysophanol
Cancer	Acute lymphocytic leukemia	SLCO1B3	chrysophanol
Cancer	Acute lymphocytic leukemia	SLCO1B3	chrysophanol
Cancer	Acute lymphocytic leukemia	TMPRSS11D	chrysophanol
Cancer	Acute lymphocytic leukemia	PLPP3	citreorosein
Cancer	Acute lymphocytic leukemia	PRSS21	citreorosein
Cancer	Acute lymphocytic leukemia	SIDT2	citreorosein
Cancer	Acute lymphocytic leukemia	TMPRSS11D	citreorosein
Cancer	Acute lymphocytic leukemia	ALDH1A1	emodin
Cancer	Acute lymphocytic leukemia	BLM	emodin
Cancer	Acute lymphocytic leukemia	GATA6	emodin
Cancer	Acute lymphocytic leukemia	KCNMA1	emodin
Cancer	Acute lymphocytic leukemia	MCM2	emodin
Cancer	Acute lymphocytic leukemia	MRAS	emodin
Cancer	Acute lymphocytic leukemia	NID1	emodin
Cancer	Acute lymphocytic leukemia	PALMD	emodin
Cancer	Acute lymphocytic leukemia	PIM1	emodin
Cancer	Acute lymphocytic leukemia	PLPP3	emodin
Cancer	Acute lymphocytic leukemia	PPARD	emodin
Cancer	Acute lymphocytic leukemia	PRDX6	emodin
Cancer	Acute lymphocytic leukemia	SDC3	emodin
Cancer	Acute lymphocytic leukemia	SLCO1B1	emodin
Cancer	Acute lymphocytic leukemia	SLCO1B1	emodin
Cancer	Acute lymphocytic leukemia	SLCO1B3	emodin
Cancer	Acute lymphocytic leukemia	SLCO1B3	emodin
Cancer	Acute lymphocytic leukemia	TMPRSS11D	emodin
Cancer	Acute lymphocytic leukemia	UGT1A3	emodin
Cancer	Acute lymphocytic leukemia	TMPRSS11D	lupeol
Cancer	Acute lymphocytic leukemia	SLCO1B1	oleanolic acid
Cancer	Acute lymphocytic leukemia	SLCO1B1	oleanolic acid
Cancer	Acute lymphocytic leukemia	SLCO1B3	oleanolic acid
Cancer	Acute lymphocytic leukemia	SLCO1B3	oleanolic acid
Cancer	Acute lymphocytic leukemia	UGT1A3	oleanolic acid
Cancer	Acute lymphocytic leukemia	ALDH1A1	physcion
Cancer	Acute lymphocytic leukemia	LAMA1	physcion
Cancer	Acute lymphocytic leukemia	SLCO1B1	physcion
Cancer	Acute lymphocytic leukemia	SLCO1B1	physcion
Cancer	Acute lymphocytic leukemia	SLCO1B3	physcion
Cancer	Acute lymphocytic leukemia	SLCO1B3	physcion
Cancer	Adenocarcinoma	ACCS	chrysophanol
Cancer	Adenocarcinoma	ACCSL	chrysophanol
Cancer	Adenocarcinoma	AGPS	chrysophanol
Cancer	Adenocarcinoma	AKR1A1	chrysophanol
Cancer	Adenocarcinoma	AKR1B1	chrysophanol
Cancer	Adenocarcinoma	AKR1B10	chrysophanol
Cancer	Adenocarcinoma	ALDH1A1	chrysophanol
Cancer	Adenocarcinoma	APEX1	chrysophanol
Cancer	Adenocarcinoma	ARF1	chrysophanol
Cancer	Adenocarcinoma	ARF3	chrysophanol
Cancer	Adenocarcinoma	ARF4	chrysophanol
Cancer	Adenocarcinoma	ARL1	chrysophanol
Cancer	Adenocarcinoma	ARL10	chrysophanol
Cancer	Adenocarcinoma	ARL11	chrysophanol
Cancer	Adenocarcinoma	ARL14	chrysophanol
Cancer	Adenocarcinoma	ARL17A	chrysophanol
Cancer	Adenocarcinoma	ARL4A	chrysophanol
Cancer	Adenocarcinoma	ARL4C	chrysophanol
Cancer	Adenocarcinoma	ARL4D	chrysophanol
Cancer	Adenocarcinoma	ARL5A	chrysophanol
Cancer	Adenocarcinoma	ARL5B	chrysophanol
Cancer	Adenocarcinoma	ARL5C	chrysophanol
Cancer	Adenocarcinoma	ARL6	chrysophanol
Cancer	Adenocarcinoma	ARL9	chrysophanol
Cancer	Adenocarcinoma	CALM2	chrysophanol
Cancer	Adenocarcinoma	CCDC80	chrysophanol
Cancer	Adenocarcinoma	CDC42	chrysophanol
Cancer	Adenocarcinoma	CTSG	chrysophanol
Cancer	Adenocarcinoma	CTSG	chrysophanol
Cancer	Adenocarcinoma	CYP3A4	chrysophanol
Cancer	Adenocarcinoma	DCLRE1A	chrysophanol
Cancer	Adenocarcinoma	DCLRE1C	chrysophanol
Cancer	Adenocarcinoma	DIRAS1	chrysophanol
Cancer	Adenocarcinoma	DIRAS2	chrysophanol
Cancer	Adenocarcinoma	DIRAS3	chrysophanol
Cancer	Adenocarcinoma	DNAJC27	chrysophanol
Cancer	Adenocarcinoma	ESR1	chrysophanol
Cancer	Adenocarcinoma	GART	chrysophanol
Cancer	Adenocarcinoma	GPT2	chrysophanol
Cancer	Adenocarcinoma	IPP	chrysophanol
Cancer	Adenocarcinoma	KDM4E	chrysophanol
Cancer	Adenocarcinoma	KMT2A	chrysophanol
Cancer	Adenocarcinoma	KRAS	chrysophanol
Cancer	Adenocarcinoma	KYAT1	chrysophanol
Cancer	Adenocarcinoma	KYAT3	chrysophanol
Cancer	Adenocarcinoma	LRRK2	chrysophanol
Cancer	Adenocarcinoma	MAG	chrysophanol
Cancer	Adenocarcinoma	MAPK1	chrysophanol
Cancer	Adenocarcinoma	MAPT	chrysophanol
Cancer	Adenocarcinoma	MGAM	chrysophanol
Cancer	Adenocarcinoma	MRAS	chrysophanol
Cancer	Adenocarcinoma	MRRF	chrysophanol
Cancer	Adenocarcinoma	NFE2L2	chrysophanol
Cancer	Adenocarcinoma	NRAS	chrysophanol
Cancer	Adenocarcinoma	P2RY12	chrysophanol
Cancer	Adenocarcinoma	P2RY12	chrysophanol
Cancer	Adenocarcinoma	POLK	chrysophanol
Cancer	Adenocarcinoma	PPWD1	chrysophanol
Cancer	Adenocarcinoma	RAB11A	chrysophanol
Cancer	Adenocarcinoma	RAB11B	chrysophanol
Cancer	Adenocarcinoma	RAB14	chrysophanol
Cancer	Adenocarcinoma	RAB25	chrysophanol
Cancer	Adenocarcinoma	RAB2A	chrysophanol
Cancer	Adenocarcinoma	RAB2B	chrysophanol
Cancer	Adenocarcinoma	RABL2A	chrysophanol
Cancer	Adenocarcinoma	RABL2B	chrysophanol
Cancer	Adenocarcinoma	RAC2	chrysophanol
Cancer	Adenocarcinoma	RAC3	chrysophanol
Cancer	Adenocarcinoma	RALA	chrysophanol
Cancer	Adenocarcinoma	RALB	chrysophanol
Cancer	Adenocarcinoma	RAP1A	chrysophanol
Cancer	Adenocarcinoma	RAP2A	chrysophanol
Cancer	Adenocarcinoma	RAP2B	chrysophanol
Cancer	Adenocarcinoma	RAP2C	chrysophanol
Cancer	Adenocarcinoma	RASD1	chrysophanol
Cancer	Adenocarcinoma	RASD2	chrysophanol
Cancer	Adenocarcinoma	RASL10A	chrysophanol
Cancer	Adenocarcinoma	RASL11A	chrysophanol
Cancer	Adenocarcinoma	RASL11B	chrysophanol
Cancer	Adenocarcinoma	RASL12	chrysophanol
Cancer	Adenocarcinoma	RECQL	chrysophanol
Cancer	Adenocarcinoma	REM1	chrysophanol
Cancer	Adenocarcinoma	RERG	chrysophanol
Cancer	Adenocarcinoma	RERGL	chrysophanol
Cancer	Adenocarcinoma	RHEB	chrysophanol
Cancer	Adenocarcinoma	RHEBL1	chrysophanol
Cancer	Adenocarcinoma	RHOB	chrysophanol
Cancer	Adenocarcinoma	RHOBTB1	chrysophanol
Cancer	Adenocarcinoma	RHOBTB2	chrysophanol
Cancer	Adenocarcinoma	RHOBTB3	chrysophanol
Cancer	Adenocarcinoma	RHOD	chrysophanol
Cancer	Adenocarcinoma	RHOF	chrysophanol
Cancer	Adenocarcinoma	RHOG	chrysophanol
Cancer	Adenocarcinoma	RHOH	chrysophanol
Cancer	Adenocarcinoma	RHOJ	chrysophanol
Cancer	Adenocarcinoma	RHOQ	chrysophanol
Cancer	Adenocarcinoma	RHOU	chrysophanol
Cancer	Adenocarcinoma	RHOV	chrysophanol
Cancer	Adenocarcinoma	RIT2	chrysophanol
Cancer	Adenocarcinoma	RND1	chrysophanol
Cancer	Adenocarcinoma	RND2	chrysophanol
Cancer	Adenocarcinoma	RND3	chrysophanol
Cancer	Adenocarcinoma	RORC	chrysophanol
Cancer	Adenocarcinoma	RRAD	chrysophanol
Cancer	Adenocarcinoma	RRAS	chrysophanol
Cancer	Adenocarcinoma	RRAS2	chrysophanol
Cancer	Adenocarcinoma	RSG1	chrysophanol
Cancer	Adenocarcinoma	SLC25A10	chrysophanol
Cancer	Adenocarcinoma	SLC25A11	chrysophanol
Cancer	Adenocarcinoma	SLCO1B3	chrysophanol
Cancer	Adenocarcinoma	SLCO1B3	chrysophanol
Cancer	Adenocarcinoma	TBC1D2	chrysophanol
Cancer	Adenocarcinoma	TBC1D2B	chrysophanol
Cancer	Adenocarcinoma	TDP1	chrysophanol
Cancer	Adenocarcinoma	TMPRSS11D	chrysophanol
Cancer	Adenocarcinoma	TRIM23	chrysophanol
Cancer	Adenocarcinoma	UGT1A1	chrysophanol
Cancer	Adenocarcinoma	USP1	chrysophanol
Cancer	Adenocarcinoma	USP2	chrysophanol
Cancer	Adenocarcinoma	ACR	citreorosein
Cancer	Adenocarcinoma	ARSH	citreorosein
Cancer	Adenocarcinoma	ATP5IF1	citreorosein
Cancer	Adenocarcinoma	AZU1	citreorosein
Cancer	Adenocarcinoma	C1RL	citreorosein
Cancer	Adenocarcinoma	C2	citreorosein
Cancer	Adenocarcinoma	CELA1	citreorosein
Cancer	Adenocarcinoma	CELA2A	citreorosein
Cancer	Adenocarcinoma	CELA2B	citreorosein
Cancer	Adenocarcinoma	CELA3A	citreorosein
Cancer	Adenocarcinoma	CFB	citreorosein
Cancer	Adenocarcinoma	CFD	citreorosein
Cancer	Adenocarcinoma	CFI	citreorosein
Cancer	Adenocarcinoma	CMA1	citreorosein
Cancer	Adenocarcinoma	CORIN	citreorosein
Cancer	Adenocarcinoma	CTRB1	citreorosein
Cancer	Adenocarcinoma	CTRB2	citreorosein
Cancer	Adenocarcinoma	CTRC	citreorosein
Cancer	Adenocarcinoma	CTSG	citreorosein
Cancer	Adenocarcinoma	CTSG	citreorosein
Cancer	Adenocarcinoma	CYP1A1	citreorosein
Cancer	Adenocarcinoma	F2	citreorosein
Cancer	Adenocarcinoma	GUSB	citreorosein
Cancer	Adenocarcinoma	GZMA	citreorosein
Cancer	Adenocarcinoma	GZMB	citreorosein
Cancer	Adenocarcinoma	GZMH	citreorosein
Cancer	Adenocarcinoma	GZMK	citreorosein
Cancer	Adenocarcinoma	HABP2	citreorosein
Cancer	Adenocarcinoma	HGF	citreorosein
Cancer	Adenocarcinoma	HGFAC	citreorosein
Cancer	Adenocarcinoma	HPN	citreorosein
Cancer	Adenocarcinoma	HPR	citreorosein
Cancer	Adenocarcinoma	KLK1	citreorosein
Cancer	Adenocarcinoma	KLK11	citreorosein
Cancer	Adenocarcinoma	KLK12	citreorosein
Cancer	Adenocarcinoma	KLK13	citreorosein
Cancer	Adenocarcinoma	KLK14	citreorosein
Cancer	Adenocarcinoma	KLK15	citreorosein
Cancer	Adenocarcinoma	KLK2	citreorosein
Cancer	Adenocarcinoma	KLK5	citreorosein
Cancer	Adenocarcinoma	KLK6	citreorosein
Cancer	Adenocarcinoma	KLK7	citreorosein
Cancer	Adenocarcinoma	KLK8	citreorosein
Cancer	Adenocarcinoma	MASP1	citreorosein
Cancer	Adenocarcinoma	MBTPS1	citreorosein
Cancer	Adenocarcinoma	MST1	citreorosein
Cancer	Adenocarcinoma	OVCH1	citreorosein
Cancer	Adenocarcinoma	PLAT	citreorosein
Cancer	Adenocarcinoma	PLAU	citreorosein
Cancer	Adenocarcinoma	PLPP2	citreorosein
Cancer	Adenocarcinoma	PLPP3	citreorosein
Cancer	Adenocarcinoma	PLPP4	citreorosein
Cancer	Adenocarcinoma	PLPP5	citreorosein
Cancer	Adenocarcinoma	PLPPR2	citreorosein
Cancer	Adenocarcinoma	PROZ	citreorosein
Cancer	Adenocarcinoma	PRSS1	citreorosein
Cancer	Adenocarcinoma	PRSS12	citreorosein
Cancer	Adenocarcinoma	PRSS21	citreorosein
Cancer	Adenocarcinoma	PRSS22	citreorosein
Cancer	Adenocarcinoma	PRSS27	citreorosein
Cancer	Adenocarcinoma	PRSS33	citreorosein
Cancer	Adenocarcinoma	PRSS36	citreorosein
Cancer	Adenocarcinoma	PRSS37	citreorosein
Cancer	Adenocarcinoma	PRSS38	citreorosein
Cancer	Adenocarcinoma	PRSS48	citreorosein
Cancer	Adenocarcinoma	PRSS50	citreorosein
Cancer	Adenocarcinoma	PRSS53	citreorosein
Cancer	Adenocarcinoma	PRSS54	citreorosein
Cancer	Adenocarcinoma	PRSS55	citreorosein
Cancer	Adenocarcinoma	PRSS8	citreorosein
Cancer	Adenocarcinoma	PRTN3	citreorosein
Cancer	Adenocarcinoma	SGPP1	citreorosein
Cancer	Adenocarcinoma	SGPP2	citreorosein
Cancer	Adenocarcinoma	SIDT1	citreorosein
Cancer	Adenocarcinoma	SLC25A20	citreorosein
Cancer	Adenocarcinoma	SLC25A29	citreorosein
Cancer	Adenocarcinoma	SLC25A45	citreorosein
Cancer	Adenocarcinoma	ST14	citreorosein
Cancer	Adenocarcinoma	TMPRSS11A	citreorosein
Cancer	Adenocarcinoma	TMPRSS11D	citreorosein
Cancer	Adenocarcinoma	TMPRSS11F	citreorosein
Cancer	Adenocarcinoma	TMPRSS12	citreorosein
Cancer	Adenocarcinoma	TMPRSS15	citreorosein
Cancer	Adenocarcinoma	TMPRSS2	citreorosein
Cancer	Adenocarcinoma	TMPRSS4	citreorosein
Cancer	Adenocarcinoma	TMPRSS5	citreorosein
Cancer	Adenocarcinoma	TPSG1	citreorosein
Cancer	Adenocarcinoma	TYR	citreorosein
Cancer	Adenocarcinoma	ACLY	emodin
Cancer	Adenocarcinoma	ADAT2	emodin
Cancer	Adenocarcinoma	ADAT3	emodin
Cancer	Adenocarcinoma	AKR1A1	emodin
Cancer	Adenocarcinoma	AKR1B1	emodin
Cancer	Adenocarcinoma	AKR1B10	emodin
Cancer	Adenocarcinoma	ALDH1A1	emodin
Cancer	Adenocarcinoma	ALG1	emodin
Cancer	Adenocarcinoma	ALG11	emodin
Cancer	Adenocarcinoma	ALG2	emodin
Cancer	Adenocarcinoma	ALOX15	emodin
Cancer	Adenocarcinoma	ANKHD1-EIF4EBP3	emodin
Cancer	Adenocarcinoma	APEX1	emodin
Cancer	Adenocarcinoma	APOBEC3G	emodin
Cancer	Adenocarcinoma	ARG2	emodin
Cancer	Adenocarcinoma	ASH2L	emodin
Cancer	Adenocarcinoma	BAG5	emodin
Cancer	Adenocarcinoma	BAG5	emodin
Cancer	Adenocarcinoma	BATF	emodin
Cancer	Adenocarcinoma	BCL2	emodin
Cancer	Adenocarcinoma	BCL2	emodin
Cancer	Adenocarcinoma	BCL2A1	emodin
Cancer	Adenocarcinoma	BCL2L14	emodin
Cancer	Adenocarcinoma	BDH2	emodin
Cancer	Adenocarcinoma	BFAR	emodin
Cancer	Adenocarcinoma	BIRC5	emodin
Cancer	Adenocarcinoma	BLM	emodin
Cancer	Adenocarcinoma	BOK	emodin
Cancer	Adenocarcinoma	C19orf48	emodin
Cancer	Adenocarcinoma	C2orf81	emodin
Cancer	Adenocarcinoma	CANX	emodin
Cancer	Adenocarcinoma	CASP1	emodin
Cancer	Adenocarcinoma	CASP8	emodin
Cancer	Adenocarcinoma	CASP8	emodin
Cancer	Adenocarcinoma	CBFB	emodin
Cancer	Adenocarcinoma	CBR3	emodin
Cancer	Adenocarcinoma	CBR4	emodin
Cancer	Adenocarcinoma	CBX1	emodin
Cancer	Adenocarcinoma	CCL20	emodin
Cancer	Adenocarcinoma	CCNB2	emodin
Cancer	Adenocarcinoma	CDK13	emodin
Cancer	Adenocarcinoma	CDK13	emodin
Cancer	Adenocarcinoma	CEBPG	emodin
Cancer	Adenocarcinoma	CELSR3	emodin
Cancer	Adenocarcinoma	CHDH	emodin
Cancer	Adenocarcinoma	CHEK1	emodin
Cancer	Adenocarcinoma	COPS5	emodin
Cancer	Adenocarcinoma	COPS8	emodin
Cancer	Adenocarcinoma	COQ10A	emodin
Cancer	Adenocarcinoma	COX6A1	emodin
Cancer	Adenocarcinoma	CRLS1	emodin
Cancer	Adenocarcinoma	CSAD	emodin
Cancer	Adenocarcinoma	CSK	emodin
Cancer	Adenocarcinoma	CSNK2A1	emodin
Cancer	Adenocarcinoma	CSNK2A1	emodin
Cancer	Adenocarcinoma	CSNK2A2	emodin
Cancer	Adenocarcinoma	CSNK2A2	emodin
Cancer	Adenocarcinoma	CTSD	emodin
Cancer	Adenocarcinoma	CTSG	emodin
Cancer	Adenocarcinoma	CTSG	emodin
Cancer	Adenocarcinoma	CXCL2	emodin
Cancer	Adenocarcinoma	CXCL8	emodin
Cancer	Adenocarcinoma	CXCR4	emodin
Cancer	Adenocarcinoma	CYLD	emodin
Cancer	Adenocarcinoma	CYP1A1	emodin
Cancer	Adenocarcinoma	CYP1A1	emodin
Cancer	Adenocarcinoma	CYP1A1	emodin
Cancer	Adenocarcinoma	CYP1B1	emodin
Cancer	Adenocarcinoma	CYP3A4	emodin
Cancer	Adenocarcinoma	DDIT3	emodin
Cancer	Adenocarcinoma	DECR2	emodin
Cancer	Adenocarcinoma	DHRS1	emodin
Cancer	Adenocarcinoma	DHRS12	emodin
Cancer	Adenocarcinoma	DHRS2	emodin
Cancer	Adenocarcinoma	DHRS4	emodin
Cancer	Adenocarcinoma	DHRS4L2	emodin
Cancer	Adenocarcinoma	DHRS7B	emodin
Cancer	Adenocarcinoma	DHRS7C	emodin
Cancer	Adenocarcinoma	DHRSX	emodin
Cancer	Adenocarcinoma	DNAJB1	emodin
Cancer	Adenocarcinoma	DNAJB1	emodin
Cancer	Adenocarcinoma	E2F5	emodin
Cancer	Adenocarcinoma	E2F5	emodin
Cancer	Adenocarcinoma	EED	emodin
Cancer	Adenocarcinoma	EGF	emodin
Cancer	Adenocarcinoma	EGFR	emodin
Cancer	Adenocarcinoma	EI24	emodin
Cancer	Adenocarcinoma	EI24	emodin
Cancer	Adenocarcinoma	EIF2B1	emodin
Cancer	Adenocarcinoma	EIF2S2	emodin
Cancer	Adenocarcinoma	EMD	emodin
Cancer	Adenocarcinoma	EPHX1	emodin
Cancer	Adenocarcinoma	ERBB2	emodin
Cancer	Adenocarcinoma	ESR1	emodin
Cancer	Adenocarcinoma	ESR1	emodin
Cancer	Adenocarcinoma	ESR1	emodin
Cancer	Adenocarcinoma	ESR2	emodin
Cancer	Adenocarcinoma	ESR2	emodin
Cancer	Adenocarcinoma	ESR2	emodin
Cancer	Adenocarcinoma	FBXO42	emodin
Cancer	Adenocarcinoma	FDX1L	emodin
Cancer	Adenocarcinoma	FKBP1A	emodin
Cancer	Adenocarcinoma	FKBP1B	emodin
Cancer	Adenocarcinoma	FMC1	emodin
Cancer	Adenocarcinoma	FMO1	emodin
Cancer	Adenocarcinoma	FMO2	emodin
Cancer	Adenocarcinoma	FMO3	emodin
Cancer	Adenocarcinoma	FMO4	emodin
Cancer	Adenocarcinoma	FMO5	emodin
Cancer	Adenocarcinoma	FN1	emodin
Cancer	Adenocarcinoma	FOXRED2	emodin
Cancer	Adenocarcinoma	GADL1	emodin
Cancer	Adenocarcinoma	GAS2	emodin
Cancer	Adenocarcinoma	GAS2	emodin
Cancer	Adenocarcinoma	GATA1	emodin
Cancer	Adenocarcinoma	GATA2	emodin
Cancer	Adenocarcinoma	GATA3	emodin
Cancer	Adenocarcinoma	GATA5	emodin
Cancer	Adenocarcinoma	GATA6	emodin
Cancer	Adenocarcinoma	GMNN	emodin
Cancer	Adenocarcinoma	GPX1	emodin
Cancer	Adenocarcinoma	GPX1	emodin
Cancer	Adenocarcinoma	GRB7	emodin
Cancer	Adenocarcinoma	GSK3B	emodin
Cancer	Adenocarcinoma	GSTM3	emodin
Cancer	Adenocarcinoma	GYS1	emodin
Cancer	Adenocarcinoma	GYS2	emodin
Cancer	Adenocarcinoma	HABP2	emodin
Cancer	Adenocarcinoma	HACD3	emodin
Cancer	Adenocarcinoma	HDC	emodin
Cancer	Adenocarcinoma	HHAT	emodin
Cancer	Adenocarcinoma	HIF1A	emodin
Cancer	Adenocarcinoma	HPGD	emodin
Cancer	Adenocarcinoma	HSD17B1	emodin
Cancer	Adenocarcinoma	HSD17B10	emodin
Cancer	Adenocarcinoma	HSD17B11	emodin
Cancer	Adenocarcinoma	HSD17B13	emodin
Cancer	Adenocarcinoma	HSD17B14	emodin
Cancer	Adenocarcinoma	HSD17B8	emodin
Cancer	Adenocarcinoma	HSDL2	emodin
Cancer	Adenocarcinoma	HSPB1	emodin
Cancer	Adenocarcinoma	ID4	emodin
Cancer	Adenocarcinoma	IL6	emodin
Cancer	Adenocarcinoma	ILKAP	emodin
Cancer	Adenocarcinoma	IMPDH1	emodin
Cancer	Adenocarcinoma	IMPDH2	emodin
Cancer	Adenocarcinoma	INS-IGF2	emodin
Cancer	Adenocarcinoma	JAK2	emodin
Cancer	Adenocarcinoma	KCNH2	emodin
Cancer	Adenocarcinoma	KCNMA1	emodin
Cancer	Adenocarcinoma	KCNU1	emodin
Cancer	Adenocarcinoma	KDM4A	emodin
Cancer	Adenocarcinoma	KLHDC10	emodin
Cancer	Adenocarcinoma	KLHDC2	emodin
Cancer	Adenocarcinoma	KLHDC3	emodin
Cancer	Adenocarcinoma	KLHDC9	emodin
Cancer	Adenocarcinoma	KMT2A	emodin
Cancer	Adenocarcinoma	KRT19	emodin
Cancer	Adenocarcinoma	LARP6	emodin
Cancer	Adenocarcinoma	LARP6	emodin
Cancer	Adenocarcinoma	LCK	emodin
Cancer	Adenocarcinoma	LCK	emodin
Cancer	Adenocarcinoma	LRP1	emodin
Cancer	Adenocarcinoma	LYN	emodin
Cancer	Adenocarcinoma	MACF1	emodin
Cancer	Adenocarcinoma	MAP3K3	emodin
Cancer	Adenocarcinoma	MAP4K5	emodin
Cancer	Adenocarcinoma	MAPK1	emodin
Cancer	Adenocarcinoma	MAPK11	emodin
Cancer	Adenocarcinoma	MAPK12	emodin
Cancer	Adenocarcinoma	MAPK13	emodin
Cancer	Adenocarcinoma	MAPK15	emodin
Cancer	Adenocarcinoma	MAPK9	emodin
Cancer	Adenocarcinoma	MAPKAPK2	emodin
Cancer	Adenocarcinoma	MAPKAPK5	emodin
Cancer	Adenocarcinoma	MAPRE1	emodin
Cancer	Adenocarcinoma	MAPRE2	emodin
Cancer	Adenocarcinoma	MAPRE3	emodin
Cancer	Adenocarcinoma	MAPT	emodin
Cancer	Adenocarcinoma	MAPT	emodin
Cancer	Adenocarcinoma	MAT2A	emodin
Cancer	Adenocarcinoma	MBNL1	emodin
Cancer	Adenocarcinoma	MCL1	emodin
Cancer	Adenocarcinoma	MCL1	emodin
Cancer	Adenocarcinoma	MCL1	emodin
Cancer	Adenocarcinoma	MCM2	emodin
Cancer	Adenocarcinoma	MCM7	emodin
Cancer	Adenocarcinoma	MCM9	emodin
Cancer	Adenocarcinoma	MGAM	emodin
Cancer	Adenocarcinoma	MMP2	emodin
Cancer	Adenocarcinoma	MMP9	emodin
Cancer	Adenocarcinoma	MORF4L1	emodin
Cancer	Adenocarcinoma	MPHOSPH8	emodin
Cancer	Adenocarcinoma	MRAS	emodin
Cancer	Adenocarcinoma	MUSK	emodin
Cancer	Adenocarcinoma	NAE1	emodin
Cancer	Adenocarcinoma	NCKAP1	emodin
Cancer	Adenocarcinoma	NDOR1	emodin
Cancer	Adenocarcinoma	NDUFB11	emodin
Cancer	Adenocarcinoma	NEDD8	emodin
Cancer	Adenocarcinoma	NEDD8-MDP1	emodin
Cancer	Adenocarcinoma	NEU2	emodin
Cancer	Adenocarcinoma	NFE2L2	emodin
Cancer	Adenocarcinoma	NFKB1	emodin
Cancer	Adenocarcinoma	NFKBIA	emodin
Cancer	Adenocarcinoma	NFKBIA	emodin
Cancer	Adenocarcinoma	NID1	emodin
Cancer	Adenocarcinoma	NKX3-1	emodin
Cancer	Adenocarcinoma	NOS3	emodin
Cancer	Adenocarcinoma	NPPA	emodin
Cancer	Adenocarcinoma	NPRL3	emodin
Cancer	Adenocarcinoma	NR1H2	emodin
Cancer	Adenocarcinoma	NT5E	emodin
Cancer	Adenocarcinoma	OGFRL1	emodin
Cancer	Adenocarcinoma	P2RY12	emodin
Cancer	Adenocarcinoma	P2RY12	emodin
Cancer	Adenocarcinoma	PALMD	emodin
Cancer	Adenocarcinoma	PARP1	emodin
Cancer	Adenocarcinoma	PARP1	emodin
Cancer	Adenocarcinoma	PCNA	emodin
Cancer	Adenocarcinoma	PDCL	emodin
Cancer	Adenocarcinoma	PDP1	emodin
Cancer	Adenocarcinoma	PDP2	emodin
Cancer	Adenocarcinoma	PDSS1	emodin
Cancer	Adenocarcinoma	PECR	emodin
Cancer	Adenocarcinoma	PHEX	emodin
Cancer	Adenocarcinoma	PHLPP1	emodin
Cancer	Adenocarcinoma	PIGA	emodin
Cancer	Adenocarcinoma	PIK3C3	emodin
Cancer	Adenocarcinoma	PIK3C3	emodin
Cancer	Adenocarcinoma	PIK3CA	emodin
Cancer	Adenocarcinoma	PKN1	emodin
Cancer	Adenocarcinoma	PLAU	emodin
Cancer	Adenocarcinoma	PLK1	emodin
Cancer	Adenocarcinoma	PLPP2	emodin
Cancer	Adenocarcinoma	PLPP3	emodin
Cancer	Adenocarcinoma	PLPP4	emodin
Cancer	Adenocarcinoma	PLPP5	emodin
Cancer	Adenocarcinoma	PLPPR2	emodin
Cancer	Adenocarcinoma	POLB	emodin
Cancer	Adenocarcinoma	POLH	emodin
Cancer	Adenocarcinoma	POLI	emodin
Cancer	Adenocarcinoma	POLK	emodin
Cancer	Adenocarcinoma	PP2D1	emodin
Cancer	Adenocarcinoma	PPARG	emodin
Cancer	Adenocarcinoma	PPEF1	emodin
Cancer	Adenocarcinoma	PPEF2	emodin
Cancer	Adenocarcinoma	PPM1B	emodin
Cancer	Adenocarcinoma	PPM1D	emodin
Cancer	Adenocarcinoma	PPM1D	emodin
Cancer	Adenocarcinoma	PPM1E	emodin
Cancer	Adenocarcinoma	PPM1F	emodin
Cancer	Adenocarcinoma	PPM1L	emodin
Cancer	Adenocarcinoma	PPM1N	emodin
Cancer	Adenocarcinoma	PPP2CA	emodin
Cancer	Adenocarcinoma	PPP2CB	emodin
Cancer	Adenocarcinoma	PPP3CA	emodin
Cancer	Adenocarcinoma	PPP3CB	emodin
Cancer	Adenocarcinoma	PPP3CC	emodin
Cancer	Adenocarcinoma	PPP4C	emodin
Cancer	Adenocarcinoma	PPP5C	emodin
Cancer	Adenocarcinoma	PPTC7	emodin
Cancer	Adenocarcinoma	PRDX6	emodin
Cancer	Adenocarcinoma	PRKAA2	emodin
Cancer	Adenocarcinoma	PRKACG	emodin
Cancer	Adenocarcinoma	PRKAG1	emodin
Cancer	Adenocarcinoma	PRKCD	emodin
Cancer	Adenocarcinoma	PRKCD	emodin
Cancer	Adenocarcinoma	PRKD1	emodin
Cancer	Adenocarcinoma	PTGS1	emodin
Cancer	Adenocarcinoma	PTGS2	emodin
Cancer	Adenocarcinoma	PTH1R	emodin
Cancer	Adenocarcinoma	PTP4A3	emodin
Cancer	Adenocarcinoma	PTP4A3	emodin
Cancer	Adenocarcinoma	RABEPK	emodin
Cancer	Adenocarcinoma	RAD51	emodin
Cancer	Adenocarcinoma	RASD1	emodin
Cancer	Adenocarcinoma	RCN2	emodin
Cancer	Adenocarcinoma	RDH10	emodin
Cancer	Adenocarcinoma	RDH11	emodin
Cancer	Adenocarcinoma	RDH14	emodin
Cancer	Adenocarcinoma	RFK	emodin
Cancer	Adenocarcinoma	RGS4	emodin
Cancer	Adenocarcinoma	RIOK1	emodin
Cancer	Adenocarcinoma	ROCK1	emodin
Cancer	Adenocarcinoma	RORC	emodin
Cancer	Adenocarcinoma	RPS6KA1	emodin
Cancer	Adenocarcinoma	RPS6KA5	emodin
Cancer	Adenocarcinoma	RPS6KB1	emodin
Cancer	Adenocarcinoma	RXRA	emodin
Cancer	Adenocarcinoma	SAE1	emodin
Cancer	Adenocarcinoma	SAE1	emodin
Cancer	Adenocarcinoma	SAFB	emodin
Cancer	Adenocarcinoma	SAFB2	emodin
Cancer	Adenocarcinoma	SDC3	emodin
Cancer	Adenocarcinoma	SDR16C5	emodin
Cancer	Adenocarcinoma	SEPSECS	emodin
Cancer	Adenocarcinoma	SERPINE1	emodin
Cancer	Adenocarcinoma	SGK1	emodin
Cancer	Adenocarcinoma	SGPL1	emodin
Cancer	Adenocarcinoma	SGPP1	emodin
Cancer	Adenocarcinoma	SGPP2	emodin
Cancer	Adenocarcinoma	SH3GL1	emodin
Cancer	Adenocarcinoma	SKAP1	emodin
Cancer	Adenocarcinoma	SLC45A2	emodin
Cancer	Adenocarcinoma	SLCO1B3	emodin
Cancer	Adenocarcinoma	SLCO1B3	emodin
Cancer	Adenocarcinoma	SLIRP	emodin
Cancer	Adenocarcinoma	SPRED1	emodin
Cancer	Adenocarcinoma	SSRP1	emodin
Cancer	Adenocarcinoma	ST8SIA1	emodin
Cancer	Adenocarcinoma	ST8SIA1	emodin
Cancer	Adenocarcinoma	STAT3	emodin
Cancer	Adenocarcinoma	STIP1	emodin
Cancer	Adenocarcinoma	SUPT16H	emodin
Cancer	Adenocarcinoma	SUPT20H	emodin
Cancer	Adenocarcinoma	SUPT20H	emodin
Cancer	Adenocarcinoma	TAB1	emodin
Cancer	Adenocarcinoma	TAOK3	emodin
Cancer	Adenocarcinoma	TBCC	emodin
Cancer	Adenocarcinoma	TDP1	emodin
Cancer	Adenocarcinoma	TGFB1	emodin
Cancer	Adenocarcinoma	THRB	emodin
Cancer	Adenocarcinoma	TMEM63A	emodin
Cancer	Adenocarcinoma	TMEM63B	emodin
Cancer	Adenocarcinoma	TMEM63C	emodin
Cancer	Adenocarcinoma	TMPRSS11D	emodin
Cancer	Adenocarcinoma	TNF	emodin
Cancer	Adenocarcinoma	TNF	emodin
Cancer	Adenocarcinoma	TOP2B	emodin
Cancer	Adenocarcinoma	TP53	emodin
Cancer	Adenocarcinoma	TRAF2	emodin
Cancer	Adenocarcinoma	TRAF2	emodin
Cancer	Adenocarcinoma	TRAF2	emodin
Cancer	Adenocarcinoma	TRPS1	emodin
Cancer	Adenocarcinoma	TRPV1	emodin
Cancer	Adenocarcinoma	TSGA13	emodin
Cancer	Adenocarcinoma	TWIST1	emodin
Cancer	Adenocarcinoma	TXNIP	emodin
Cancer	Adenocarcinoma	TXNL4B	emodin
Cancer	Adenocarcinoma	TYW1	emodin
Cancer	Adenocarcinoma	UGT1A1	emodin
Cancer	Adenocarcinoma	UGT1A3	emodin
Cancer	Adenocarcinoma	UGT1A7	emodin
Cancer	Adenocarcinoma	UGT2B15	emodin
Cancer	Adenocarcinoma	UGT2B15	emodin
Cancer	Adenocarcinoma	UGT2B7	emodin
Cancer	Adenocarcinoma	USP1	emodin
Cancer	Adenocarcinoma	VEGFA	emodin
Cancer	Adenocarcinoma	WARS	emodin
Cancer	Adenocarcinoma	WARS2	emodin
Cancer	Adenocarcinoma	XRCC1	emodin
Cancer	Adenocarcinoma	ZFAND4	emodin
Cancer	Adenocarcinoma	ZGLP1	emodin
Cancer	Adenocarcinoma	ANGPT1	lupeol
Cancer	Adenocarcinoma	ANGPT2	lupeol
Cancer	Adenocarcinoma	ANGPT4	lupeol
Cancer	Adenocarcinoma	CAT	lupeol
Cancer	Adenocarcinoma	CDC42	lupeol
Cancer	Adenocarcinoma	CPVL	lupeol
Cancer	Adenocarcinoma	CRYZ	lupeol
Cancer	Adenocarcinoma	CRYZL1	lupeol
Cancer	Adenocarcinoma	CTNNB1	lupeol
Cancer	Adenocarcinoma	CYP3A4	lupeol
Cancer	Adenocarcinoma	CYTB	lupeol
Cancer	Adenocarcinoma	EIF3A	lupeol
Cancer	Adenocarcinoma	FDPS	lupeol
Cancer	Adenocarcinoma	GPAM	lupeol
Cancer	Adenocarcinoma	GPATCH1	lupeol
Cancer	Adenocarcinoma	HMGCR	lupeol
Cancer	Adenocarcinoma	HMGCS1	lupeol
Cancer	Adenocarcinoma	IDI1	lupeol
Cancer	Adenocarcinoma	IDI2	lupeol
Cancer	Adenocarcinoma	IKZF5	lupeol
Cancer	Adenocarcinoma	LARP6	lupeol
Cancer	Adenocarcinoma	LSS	lupeol
Cancer	Adenocarcinoma	MITF	lupeol
Cancer	Adenocarcinoma	NUDT21	lupeol
Cancer	Adenocarcinoma	PMVK	lupeol
Cancer	Adenocarcinoma	POLH	lupeol
Cancer	Adenocarcinoma	POLI	lupeol
Cancer	Adenocarcinoma	POLK	lupeol
Cancer	Adenocarcinoma	PPEF1	lupeol
Cancer	Adenocarcinoma	PPEF2	lupeol
Cancer	Adenocarcinoma	PPP2CA	lupeol
Cancer	Adenocarcinoma	PPP2CB	lupeol
Cancer	Adenocarcinoma	PPP3CA	lupeol
Cancer	Adenocarcinoma	PPP3CB	lupeol
Cancer	Adenocarcinoma	PPP3CC	lupeol
Cancer	Adenocarcinoma	PPP4C	lupeol
Cancer	Adenocarcinoma	PPP5C	lupeol
Cancer	Adenocarcinoma	PSPH	lupeol
Cancer	Adenocarcinoma	PTEN	lupeol
Cancer	Adenocarcinoma	REV1	lupeol
Cancer	Adenocarcinoma	RTN4IP1	lupeol
Cancer	Adenocarcinoma	RUSC1	lupeol
Cancer	Adenocarcinoma	SP1	lupeol
Cancer	Adenocarcinoma	STXBP2	lupeol
Cancer	Adenocarcinoma	STXBP3	lupeol
Cancer	Adenocarcinoma	TMPRSS11D	lupeol
Cancer	Adenocarcinoma	TOP1	lupeol
Cancer	Adenocarcinoma	TP53	lupeol
Cancer	Adenocarcinoma	TP53I3	lupeol
Cancer	Adenocarcinoma	VAT1	lupeol
Cancer	Adenocarcinoma	VAT1L	lupeol
Cancer	Adenocarcinoma	ACACB	oleanolic acid
Cancer	Adenocarcinoma	ACP1	oleanolic acid
Cancer	Adenocarcinoma	ACSF3	oleanolic acid
Cancer	Adenocarcinoma	AKR1B1	oleanolic acid
Cancer	Adenocarcinoma	AKR1B10	oleanolic acid
Cancer	Adenocarcinoma	AKR1B10	oleanolic acid
Cancer	Adenocarcinoma	APP	oleanolic acid
Cancer	Adenocarcinoma	APP	oleanolic acid
Cancer	Adenocarcinoma	ATAD5	oleanolic acid
Cancer	Adenocarcinoma	CARNS1	oleanolic acid
Cancer	Adenocarcinoma	CASP8	oleanolic acid
Cancer	Adenocarcinoma	CAT	oleanolic acid
Cancer	Adenocarcinoma	CBX1	oleanolic acid
Cancer	Adenocarcinoma	CCND1	oleanolic acid
Cancer	Adenocarcinoma	CDC45	oleanolic acid
Cancer	Adenocarcinoma	CKB	oleanolic acid
Cancer	Adenocarcinoma	CKM	oleanolic acid
Cancer	Adenocarcinoma	CPVL	oleanolic acid
Cancer	Adenocarcinoma	CRYZL1	oleanolic acid
Cancer	Adenocarcinoma	CUL3	oleanolic acid
Cancer	Adenocarcinoma	CYP19A1	oleanolic acid
Cancer	Adenocarcinoma	CYP19A1	oleanolic acid
Cancer	Adenocarcinoma	DUSP3	oleanolic acid
Cancer	Adenocarcinoma	DUSP3	oleanolic acid
Cancer	Adenocarcinoma	EPHX3	oleanolic acid
Cancer	Adenocarcinoma	GANAB	oleanolic acid
Cancer	Adenocarcinoma	GANC	oleanolic acid
Cancer	Adenocarcinoma	GMNN	oleanolic acid
Cancer	Adenocarcinoma	GPX1	oleanolic acid
Cancer	Adenocarcinoma	GSK3B	oleanolic acid
Cancer	Adenocarcinoma	HMGB1	oleanolic acid
Cancer	Adenocarcinoma	HMGCR	oleanolic acid
Cancer	Adenocarcinoma	HMGCS1	oleanolic acid
Cancer	Adenocarcinoma	HSD17B2	oleanolic acid
Cancer	Adenocarcinoma	ICAM1	oleanolic acid
Cancer	Adenocarcinoma	IDH1	oleanolic acid
Cancer	Adenocarcinoma	IDI1	oleanolic acid
Cancer	Adenocarcinoma	IDI2	oleanolic acid
Cancer	Adenocarcinoma	KAT2A	oleanolic acid
Cancer	Adenocarcinoma	LSS	oleanolic acid
Cancer	Adenocarcinoma	MET	oleanolic acid
Cancer	Adenocarcinoma	MGLL	oleanolic acid
Cancer	Adenocarcinoma	MGLL	oleanolic acid
Cancer	Adenocarcinoma	NAMPT	oleanolic acid
Cancer	Adenocarcinoma	NFE2	oleanolic acid
Cancer	Adenocarcinoma	NFE2L2	oleanolic acid
Cancer	Adenocarcinoma	NMU	oleanolic acid
Cancer	Adenocarcinoma	NQO1	oleanolic acid
Cancer	Adenocarcinoma	PLA2G1B	oleanolic acid
Cancer	Adenocarcinoma	PLA2G1B	oleanolic acid
Cancer	Adenocarcinoma	PLK1	oleanolic acid
Cancer	Adenocarcinoma	POLB	oleanolic acid
Cancer	Adenocarcinoma	POLB	oleanolic acid
Cancer	Adenocarcinoma	POLH	oleanolic acid
Cancer	Adenocarcinoma	POLI	oleanolic acid
Cancer	Adenocarcinoma	POLK	oleanolic acid
Cancer	Adenocarcinoma	PTEN	oleanolic acid
Cancer	Adenocarcinoma	PTGIR	oleanolic acid
Cancer	Adenocarcinoma	PTGS1	oleanolic acid
Cancer	Adenocarcinoma	PTGS2	oleanolic acid
Cancer	Adenocarcinoma	PTGS2	oleanolic acid
Cancer	Adenocarcinoma	PTPN11	oleanolic acid
Cancer	Adenocarcinoma	PTPN11	oleanolic acid
Cancer	Adenocarcinoma	PTPN7	oleanolic acid
Cancer	Adenocarcinoma	PTPRA	oleanolic acid
Cancer	Adenocarcinoma	PTPRE	oleanolic acid
Cancer	Adenocarcinoma	PTPRF	oleanolic acid
Cancer	Adenocarcinoma	PTPRF	oleanolic acid
Cancer	Adenocarcinoma	RAPGEF4	oleanolic acid
Cancer	Adenocarcinoma	REV1	oleanolic acid
Cancer	Adenocarcinoma	RNASE3	oleanolic acid
Cancer	Adenocarcinoma	RTN4IP1	oleanolic acid
Cancer	Adenocarcinoma	SLC10A1	oleanolic acid
Cancer	Adenocarcinoma	SLCO1B3	oleanolic acid
Cancer	Adenocarcinoma	SLCO1B3	oleanolic acid
Cancer	Adenocarcinoma	STAT3	oleanolic acid
Cancer	Adenocarcinoma	STMN4	oleanolic acid
Cancer	Adenocarcinoma	TDP1	oleanolic acid
Cancer	Adenocarcinoma	TOP1	oleanolic acid
Cancer	Adenocarcinoma	TP53I3	oleanolic acid
Cancer	Adenocarcinoma	UGT1A1	oleanolic acid
Cancer	Adenocarcinoma	UGT1A3	oleanolic acid
Cancer	Adenocarcinoma	UGT1A7	oleanolic acid
Cancer	Adenocarcinoma	UGT2B10	oleanolic acid
Cancer	Adenocarcinoma	UGT2B11	oleanolic acid
Cancer	Adenocarcinoma	VAT1	oleanolic acid
Cancer	Adenocarcinoma	VAT1L	oleanolic acid
Cancer	Adenocarcinoma	YWHAE	oleanolic acid
Cancer	Adenocarcinoma	ALDH1A1	physcion
Cancer	Adenocarcinoma	ALOX15	physcion
Cancer	Adenocarcinoma	ATP6AP1	physcion
Cancer	Adenocarcinoma	CTSG	physcion
Cancer	Adenocarcinoma	CTSG	physcion
Cancer	Adenocarcinoma	CXCL13	physcion
Cancer	Adenocarcinoma	CYP51A1	physcion
Cancer	Adenocarcinoma	ESR1	physcion
Cancer	Adenocarcinoma	FOXG1	physcion
Cancer	Adenocarcinoma	FOXRED1	physcion
Cancer	Adenocarcinoma	GLA	physcion
Cancer	Adenocarcinoma	HPGD	physcion
Cancer	Adenocarcinoma	KDM4E	physcion
Cancer	Adenocarcinoma	KLHDC3	physcion
Cancer	Adenocarcinoma	LAMA1	physcion
Cancer	Adenocarcinoma	LARP6	physcion
Cancer	Adenocarcinoma	LCK	physcion
Cancer	Adenocarcinoma	MAP3K2	physcion
Cancer	Adenocarcinoma	MAP3K3	physcion
Cancer	Adenocarcinoma	MAPT	physcion
Cancer	Adenocarcinoma	MCL1	physcion
Cancer	Adenocarcinoma	MGAM	physcion
Cancer	Adenocarcinoma	NPRL3	physcion
Cancer	Adenocarcinoma	NR1I2	physcion
Cancer	Adenocarcinoma	P2RY12	physcion
Cancer	Adenocarcinoma	P2RY12	physcion
Cancer	Adenocarcinoma	PARP1	physcion
Cancer	Adenocarcinoma	POLK	physcion
Cancer	Adenocarcinoma	POLL	physcion
Cancer	Adenocarcinoma	PPWD1	physcion
Cancer	Adenocarcinoma	SHISA4	physcion
Cancer	Adenocarcinoma	SLC25A10	physcion
Cancer	Adenocarcinoma	SLC25A11	physcion
Cancer	Adenocarcinoma	SLCO1B3	physcion
Cancer	Adenocarcinoma	SLCO1B3	physcion
Cancer	Adenocarcinoma	SPX	physcion
Cancer	Adenocarcinoma	TES	physcion
Cancer	Adenocarcinoma	THRB	physcion
Cancer	Adenocarcinoma	TNS1	physcion
Cancer	Adenocarcinoma	TWSG1	physcion
Cancer	Adenocarcinoma	USP1	physcion
Cancer	Adenocarcinoma	TGM3	stigmastane-3,6-dione
Cancer	Adenocarcinoma	TGM5	stigmastane-3,6-dione
Cancer	Adenocarcinoma	TGM6	stigmastane-3,6-dione
Cancer	Adenocarcinoma	TGM7	stigmastane-3,6-dione
Cancer	Benign Neoplasm	AHR	chrysophanol
Cancer	Benign Neoplasm	AKR1B10	chrysophanol
Cancer	Benign Neoplasm	ARF4	chrysophanol
Cancer	Benign Neoplasm	BRCA1	chrysophanol
Cancer	Benign Neoplasm	VDR	chrysophanol
Cancer	Benign Neoplasm	C1S	citreorosein
Cancer	Benign Neoplasm	CELA3A	citreorosein
Cancer	Benign Neoplasm	CFD	citreorosein
Cancer	Benign Neoplasm	F10	citreorosein
Cancer	Benign Neoplasm	MST1	citreorosein
Cancer	Benign Neoplasm	PLPP1	citreorosein
Cancer	Benign Neoplasm	SLC25A20	citreorosein
Cancer	Benign Neoplasm	ADIPOQ	emodin
Cancer	Benign Neoplasm	AHR	emodin
Cancer	Benign Neoplasm	AKR1B10	emodin
Cancer	Benign Neoplasm	ATM	emodin
Cancer	Benign Neoplasm	ATM	emodin
Cancer	Benign Neoplasm	BIRC5	emodin
Cancer	Benign Neoplasm	CASP1	emodin
Cancer	Benign Neoplasm	ERCC1	emodin
Cancer	Benign Neoplasm	EZR	emodin
Cancer	Benign Neoplasm	FASN	emodin
Cancer	Benign Neoplasm	FOXO1	emodin
Cancer	Benign Neoplasm	FOXO1	emodin
Cancer	Benign Neoplasm	PALMD	emodin
Cancer	Benign Neoplasm	PLPP1	emodin
Cancer	Benign Neoplasm	STAT3	emodin
Cancer	Benign Neoplasm	TOP2A	emodin
Cancer	Benign Neoplasm	TOP2A	emodin
Cancer	Benign Neoplasm	TRPV1	emodin
Cancer	Benign Neoplasm	VDR	emodin
Cancer	Benign Neoplasm	TOP1	lupeol
Cancer	Benign Neoplasm	TOP2A	lupeol
Cancer	Benign Neoplasm	TOP2A	lupeol
Cancer	Benign Neoplasm	ABCB1	oleanolic acid
Cancer	Benign Neoplasm	ACACB	oleanolic acid
Cancer	Benign Neoplasm	AKR1B10	oleanolic acid
Cancer	Benign Neoplasm	AKR1B10	oleanolic acid
Cancer	Benign Neoplasm	PLA2G1B	oleanolic acid
Cancer	Benign Neoplasm	PLA2G1B	oleanolic acid
Cancer	Benign Neoplasm	PPARA	oleanolic acid
Cancer	Benign Neoplasm	PTPN11	oleanolic acid
Cancer	Benign Neoplasm	PTPN11	oleanolic acid
Cancer	Benign Neoplasm	PTPRC	oleanolic acid
Cancer	Benign Neoplasm	STAT3	oleanolic acid
Cancer	Benign Neoplasm	TOP1	oleanolic acid
Cancer	Benign Neoplasm	TOP2A	oleanolic acid
Cancer	Benign Neoplasm	VDR	physcion
Cancer	Benign Neoplasm	F13A1	stigmastane-3,6-dione
Cancer	Brain Neoplasms	CYP2C9	chrysophanol
Cancer	Brain Neoplasms	KYAT3	chrysophanol
Cancer	Brain Neoplasms	P2RY12	chrysophanol
Cancer	Brain Neoplasms	P2RY12	chrysophanol
Cancer	Brain Neoplasms	RASL11B	chrysophanol
Cancer	Brain Neoplasms	RECQL	chrysophanol
Cancer	Brain Neoplasms	RHOBTB3	chrysophanol
Cancer	Brain Neoplasms	RHOQ	chrysophanol
Cancer	Brain Neoplasms	RND1	chrysophanol
Cancer	Brain Neoplasms	RSG1	chrysophanol
Cancer	Brain Neoplasms	TBC1D2B	chrysophanol
Cancer	Brain Neoplasms	TRIM23	chrysophanol
Cancer	Brain Neoplasms	USP2	chrysophanol
Cancer	Brain Neoplasms	C1S	citreorosein
Cancer	Brain Neoplasms	PLPP3	citreorosein
Cancer	Brain Neoplasms	PRSS12	citreorosein
Cancer	Brain Neoplasms	PRSS22	citreorosein
Cancer	Brain Neoplasms	TMPRSS13	citreorosein
Cancer	Brain Neoplasms	TMPRSS2	citreorosein
Cancer	Brain Neoplasms	TMPRSS5	citreorosein
Cancer	Brain Neoplasms	ASH2L	emodin
Cancer	Brain Neoplasms	BDH2	emodin
Cancer	Brain Neoplasms	C19orf48	emodin
Cancer	Brain Neoplasms	CBR1	emodin
Cancer	Brain Neoplasms	CDK4	emodin
Cancer	Brain Neoplasms	CDK4	emodin
Cancer	Brain Neoplasms	CEBPG	emodin
Cancer	Brain Neoplasms	CYP2C9	emodin
Cancer	Brain Neoplasms	CYP2C9	emodin
Cancer	Brain Neoplasms	DHRS12	emodin
Cancer	Brain Neoplasms	DHRS4L2	emodin
Cancer	Brain Neoplasms	DHRS7B	emodin
Cancer	Brain Neoplasms	EI24	emodin
Cancer	Brain Neoplasms	EI24	emodin
Cancer	Brain Neoplasms	FEN1	emodin
Cancer	Brain Neoplasms	GAD1	emodin
Cancer	Brain Neoplasms	MAP4K5	emodin
Cancer	Brain Neoplasms	MIOS	emodin
Cancer	Brain Neoplasms	MORF4L1	emodin
Cancer	Brain Neoplasms	MPHOSPH8	emodin
Cancer	Brain Neoplasms	NDOR1	emodin
Cancer	Brain Neoplasms	P2RY12	emodin
Cancer	Brain Neoplasms	P2RY12	emodin
Cancer	Brain Neoplasms	PALMD	emodin
Cancer	Brain Neoplasms	PCNA	emodin
Cancer	Brain Neoplasms	PLPP3	emodin
Cancer	Brain Neoplasms	PPM1L	emodin
Cancer	Brain Neoplasms	PPP3CB	emodin
Cancer	Brain Neoplasms	PRDX6	emodin
Cancer	Brain Neoplasms	PRKAG2	emodin
Cancer	Brain Neoplasms	RELA	emodin
Cancer	Brain Neoplasms	SEC61G	emodin
Cancer	Brain Neoplasms	TRAF2	emodin
Cancer	Brain Neoplasms	TRAF2	emodin
Cancer	Brain Neoplasms	TRAF2	emodin
Cancer	Brain Neoplasms	UGT2B15	emodin
Cancer	Brain Neoplasms	UGT2B15	emodin
Cancer	Brain Neoplasms	ANGPT2	lupeol
Cancer	Brain Neoplasms	IKZF5	lupeol
Cancer	Brain Neoplasms	PPP3CB	lupeol
Cancer	Brain Neoplasms	APP	oleanolic acid
Cancer	Brain Neoplasms	APP	oleanolic acid
Cancer	Brain Neoplasms	HDAC1	oleanolic acid
Cancer	Brain Neoplasms	KEAP1	oleanolic acid
Cancer	Brain Neoplasms	PTPN11	oleanolic acid
Cancer	Brain Neoplasms	PTPN11	oleanolic acid
Cancer	Brain Neoplasms	RELA	oleanolic acid
Cancer	Brain Neoplasms	SLC10A1	oleanolic acid
Cancer	Brain Neoplasms	FOXG1	physcion
Cancer	Brain Neoplasms	GLA	physcion
Cancer	Brain Neoplasms	P2RY12	physcion
Cancer	Brain Neoplasms	P2RY12	physcion
Cancer	Brain Neoplasms	TGM2	stigmastane-3,6-dione
Cancer	Breast Carcinoma	ACCSL	chrysophanol
Cancer	Breast Carcinoma	AHR	chrysophanol
Cancer	Breast Carcinoma	AKR1A1	chrysophanol
Cancer	Breast Carcinoma	AKR1B1	chrysophanol
Cancer	Breast Carcinoma	AR	chrysophanol
Cancer	Breast Carcinoma	ARF1	chrysophanol
Cancer	Breast Carcinoma	ARF3	chrysophanol
Cancer	Breast Carcinoma	ARL11	chrysophanol
Cancer	Breast Carcinoma	ARL14	chrysophanol
Cancer	Breast Carcinoma	ARL4A	chrysophanol
Cancer	Breast Carcinoma	ARL5A	chrysophanol
Cancer	Breast Carcinoma	ARL5C	chrysophanol
Cancer	Breast Carcinoma	ARL6	chrysophanol
Cancer	Breast Carcinoma	ARL9	chrysophanol
Cancer	Breast Carcinoma	BRCA1	chrysophanol
Cancer	Breast Carcinoma	CALM2	chrysophanol
Cancer	Breast Carcinoma	CDC42	chrysophanol
Cancer	Breast Carcinoma	CYP3A4	chrysophanol
Cancer	Breast Carcinoma	DCLRE1A	chrysophanol
Cancer	Breast Carcinoma	DIRAS1	chrysophanol
Cancer	Breast Carcinoma	DIRAS2	chrysophanol
Cancer	Breast Carcinoma	DIRAS3	chrysophanol
Cancer	Breast Carcinoma	DNAJC27	chrysophanol
Cancer	Breast Carcinoma	EHMT2	chrysophanol
Cancer	Breast Carcinoma	EPHX2	chrysophanol
Cancer	Breast Carcinoma	EPHX2	chrysophanol
Cancer	Breast Carcinoma	ESR1	chrysophanol
Cancer	Breast Carcinoma	GPT	chrysophanol
Cancer	Breast Carcinoma	HRAS	chrysophanol
Cancer	Breast Carcinoma	IPP	chrysophanol
Cancer	Breast Carcinoma	KDM4E	chrysophanol
Cancer	Breast Carcinoma	KRAS	chrysophanol
Cancer	Breast Carcinoma	KYAT1	chrysophanol
Cancer	Breast Carcinoma	KYAT3	chrysophanol
Cancer	Breast Carcinoma	MAG	chrysophanol
Cancer	Breast Carcinoma	MAPK14	chrysophanol
Cancer	Breast Carcinoma	MAPT	chrysophanol
Cancer	Breast Carcinoma	MGAM	chrysophanol
Cancer	Breast Carcinoma	NFE2L2	chrysophanol
Cancer	Breast Carcinoma	NR3C1	chrysophanol
Cancer	Breast Carcinoma	P2RY12	chrysophanol
Cancer	Breast Carcinoma	P2RY12	chrysophanol
Cancer	Breast Carcinoma	POLK	chrysophanol
Cancer	Breast Carcinoma	PPWD1	chrysophanol
Cancer	Breast Carcinoma	RAB11A	chrysophanol
Cancer	Breast Carcinoma	RAB11B	chrysophanol
Cancer	Breast Carcinoma	RAB14	chrysophanol
Cancer	Breast Carcinoma	RAB2A	chrysophanol
Cancer	Breast Carcinoma	RAB2B	chrysophanol
Cancer	Breast Carcinoma	RABL2A	chrysophanol
Cancer	Breast Carcinoma	RABL2B	chrysophanol
Cancer	Breast Carcinoma	RAC2	chrysophanol
Cancer	Breast Carcinoma	RAC3	chrysophanol
Cancer	Breast Carcinoma	RALA	chrysophanol
Cancer	Breast Carcinoma	RALB	chrysophanol
Cancer	Breast Carcinoma	RAP1A	chrysophanol
Cancer	Breast Carcinoma	RAP2A	chrysophanol
Cancer	Breast Carcinoma	RAP2B	chrysophanol
Cancer	Breast Carcinoma	RAP2C	chrysophanol
Cancer	Breast Carcinoma	RASD2	chrysophanol
Cancer	Breast Carcinoma	RASL10A	chrysophanol
Cancer	Breast Carcinoma	RASL11A	chrysophanol
Cancer	Breast Carcinoma	RASL12	chrysophanol
Cancer	Breast Carcinoma	RECQL	chrysophanol
Cancer	Breast Carcinoma	REM1	chrysophanol
Cancer	Breast Carcinoma	REM2	chrysophanol
Cancer	Breast Carcinoma	RERGL	chrysophanol
Cancer	Breast Carcinoma	RHEB	chrysophanol
Cancer	Breast Carcinoma	RHEBL1	chrysophanol
Cancer	Breast Carcinoma	RHOB	chrysophanol
Cancer	Breast Carcinoma	RHOBTB1	chrysophanol
Cancer	Breast Carcinoma	RHOF	chrysophanol
Cancer	Breast Carcinoma	RHOH	chrysophanol
Cancer	Breast Carcinoma	RHOQ	chrysophanol
Cancer	Breast Carcinoma	RHOU	chrysophanol
Cancer	Breast Carcinoma	RIT2	chrysophanol
Cancer	Breast Carcinoma	RND1	chrysophanol
Cancer	Breast Carcinoma	RRAD	chrysophanol
Cancer	Breast Carcinoma	RSG1	chrysophanol
Cancer	Breast Carcinoma	SLC25A10	chrysophanol
Cancer	Breast Carcinoma	SLC25A11	chrysophanol
Cancer	Breast Carcinoma	SLCO1B1	chrysophanol
Cancer	Breast Carcinoma	SLCO1B1	chrysophanol
Cancer	Breast Carcinoma	TBC1D2	chrysophanol
Cancer	Breast Carcinoma	TBC1D2B	chrysophanol
Cancer	Breast Carcinoma	TDP1	chrysophanol
Cancer	Breast Carcinoma	UGT1A6	chrysophanol
Cancer	Breast Carcinoma	UGT1A9	chrysophanol
Cancer	Breast Carcinoma	USP1	chrysophanol
Cancer	Breast Carcinoma	USP2	chrysophanol
Cancer	Breast Carcinoma	VDR	chrysophanol
Cancer	Breast Carcinoma	ACR	citreorosein
Cancer	Breast Carcinoma	ARSH	citreorosein
Cancer	Breast Carcinoma	AZU1	citreorosein
Cancer	Breast Carcinoma	C2	citreorosein
Cancer	Breast Carcinoma	CELA1	citreorosein
Cancer	Breast Carcinoma	CELA2A	citreorosein
Cancer	Breast Carcinoma	CMA1	citreorosein
Cancer	Breast Carcinoma	CORIN	citreorosein
Cancer	Breast Carcinoma	CTRB1	citreorosein
Cancer	Breast Carcinoma	CTRB2	citreorosein
Cancer	Breast Carcinoma	CTRC	citreorosein
Cancer	Breast Carcinoma	CYP1A1	citreorosein
Cancer	Breast Carcinoma	F10	citreorosein
Cancer	Breast Carcinoma	GZMB	citreorosein
Cancer	Breast Carcinoma	GZMH	citreorosein
Cancer	Breast Carcinoma	GZMK	citreorosein
Cancer	Breast Carcinoma	GZMM	citreorosein
Cancer	Breast Carcinoma	HABP2	citreorosein
Cancer	Breast Carcinoma	HGF	citreorosein
Cancer	Breast Carcinoma	HGFAC	citreorosein
Cancer	Breast Carcinoma	HP	citreorosein
Cancer	Breast Carcinoma	HPN	citreorosein
Cancer	Breast Carcinoma	HPR	citreorosein
Cancer	Breast Carcinoma	KLK10	citreorosein
Cancer	Breast Carcinoma	KLK11	citreorosein
Cancer	Breast Carcinoma	KLK12	citreorosein
Cancer	Breast Carcinoma	KLK13	citreorosein
Cancer	Breast Carcinoma	KLK14	citreorosein
Cancer	Breast Carcinoma	KLK15	citreorosein
Cancer	Breast Carcinoma	KLK2	citreorosein
Cancer	Breast Carcinoma	KLK5	citreorosein
Cancer	Breast Carcinoma	KLK6	citreorosein
Cancer	Breast Carcinoma	KLK7	citreorosein
Cancer	Breast Carcinoma	KLK8	citreorosein
Cancer	Breast Carcinoma	MBTPS1	citreorosein
Cancer	Breast Carcinoma	MST1	citreorosein
Cancer	Breast Carcinoma	OVCH1	citreorosein
Cancer	Breast Carcinoma	PLAU	citreorosein
Cancer	Breast Carcinoma	PLPP1	citreorosein
Cancer	Breast Carcinoma	PLPP3	citreorosein
Cancer	Breast Carcinoma	PLPP4	citreorosein
Cancer	Breast Carcinoma	PLPP5	citreorosein
Cancer	Breast Carcinoma	PLPPR2	citreorosein
Cancer	Breast Carcinoma	PROZ	citreorosein
Cancer	Breast Carcinoma	PRSS1	citreorosein
Cancer	Breast Carcinoma	PRSS22	citreorosein
Cancer	Breast Carcinoma	PRSS27	citreorosein
Cancer	Breast Carcinoma	PRSS33	citreorosein
Cancer	Breast Carcinoma	PRSS36	citreorosein
Cancer	Breast Carcinoma	PRSS37	citreorosein
Cancer	Breast Carcinoma	PRSS38	citreorosein
Cancer	Breast Carcinoma	PRSS48	citreorosein
Cancer	Breast Carcinoma	PRSS50	citreorosein
Cancer	Breast Carcinoma	PRSS53	citreorosein
Cancer	Breast Carcinoma	PRSS54	citreorosein
Cancer	Breast Carcinoma	PRSS55	citreorosein
Cancer	Breast Carcinoma	PRSS57	citreorosein
Cancer	Breast Carcinoma	SGPP1	citreorosein
Cancer	Breast Carcinoma	SGPP2	citreorosein
Cancer	Breast Carcinoma	SIDT1	citreorosein
Cancer	Breast Carcinoma	SIDT2	citreorosein
Cancer	Breast Carcinoma	SLC25A29	citreorosein
Cancer	Breast Carcinoma	SLC25A48	citreorosein
Cancer	Breast Carcinoma	ST14	citreorosein
Cancer	Breast Carcinoma	TMPRSS11A	citreorosein
Cancer	Breast Carcinoma	TMPRSS11B	citreorosein
Cancer	Breast Carcinoma	TMPRSS11E	citreorosein
Cancer	Breast Carcinoma	TMPRSS11F	citreorosein
Cancer	Breast Carcinoma	TMPRSS12	citreorosein
Cancer	Breast Carcinoma	TMPRSS13	citreorosein
Cancer	Breast Carcinoma	TMPRSS5	citreorosein
Cancer	Breast Carcinoma	TMPRSS7	citreorosein
Cancer	Breast Carcinoma	TPSD1	citreorosein
Cancer	Breast Carcinoma	TPSG1	citreorosein
Cancer	Breast Carcinoma	ACLY	emodin
Cancer	Breast Carcinoma	ADAT2	emodin
Cancer	Breast Carcinoma	ADAT3	emodin
Cancer	Breast Carcinoma	AHR	emodin
Cancer	Breast Carcinoma	AKR1A1	emodin
Cancer	Breast Carcinoma	AKR1B1	emodin
Cancer	Breast Carcinoma	AKT1	emodin
Cancer	Breast Carcinoma	AKT1	emodin
Cancer	Breast Carcinoma	ALG11	emodin
Cancer	Breast Carcinoma	ALG2	emodin
Cancer	Breast Carcinoma	ALOX15	emodin
Cancer	Breast Carcinoma	AR	emodin
Cancer	Breast Carcinoma	ARG2	emodin
Cancer	Breast Carcinoma	ASH2L	emodin
Cancer	Breast Carcinoma	BAG5	emodin
Cancer	Breast Carcinoma	BAG5	emodin
Cancer	Breast Carcinoma	BATF	emodin
Cancer	Breast Carcinoma	BAX	emodin
Cancer	Breast Carcinoma	BCL2	emodin
Cancer	Breast Carcinoma	BCL2	emodin
Cancer	Breast Carcinoma	BCL2A1	emodin
Cancer	Breast Carcinoma	BCL2L14	emodin
Cancer	Breast Carcinoma	BDH2	emodin
Cancer	Breast Carcinoma	BIRC5	emodin
Cancer	Breast Carcinoma	BLM	emodin
Cancer	Breast Carcinoma	BOK	emodin
Cancer	Breast Carcinoma	C2orf81	emodin
Cancer	Breast Carcinoma	CASP3	emodin
Cancer	Breast Carcinoma	CASP3	emodin
Cancer	Breast Carcinoma	CASP8	emodin
Cancer	Breast Carcinoma	CASP8	emodin
Cancer	Breast Carcinoma	CBFB	emodin
Cancer	Breast Carcinoma	CBR1	emodin
Cancer	Breast Carcinoma	CBR4	emodin
Cancer	Breast Carcinoma	CBX1	emodin
Cancer	Breast Carcinoma	CCL20	emodin
Cancer	Breast Carcinoma	CCNB2	emodin
Cancer	Breast Carcinoma	CDIPT	emodin
Cancer	Breast Carcinoma	CDK13	emodin
Cancer	Breast Carcinoma	CDK13	emodin
Cancer	Breast Carcinoma	CDK2	emodin
Cancer	Breast Carcinoma	CDK4	emodin
Cancer	Breast Carcinoma	CDK4	emodin
Cancer	Breast Carcinoma	CEBPG	emodin
Cancer	Breast Carcinoma	CELSR3	emodin
Cancer	Breast Carcinoma	CHDH	emodin
Cancer	Breast Carcinoma	CHEK1	emodin
Cancer	Breast Carcinoma	COPS5	emodin
Cancer	Breast Carcinoma	COQ10B	emodin
Cancer	Breast Carcinoma	COX6A1	emodin
Cancer	Breast Carcinoma	COX6A2	emodin
Cancer	Breast Carcinoma	CRLS1	emodin
Cancer	Breast Carcinoma	CRYGC	emodin
Cancer	Breast Carcinoma	CSF2	emodin
Cancer	Breast Carcinoma	CSK	emodin
Cancer	Breast Carcinoma	CXCL2	emodin
Cancer	Breast Carcinoma	CXCL8	emodin
Cancer	Breast Carcinoma	CXCR4	emodin
Cancer	Breast Carcinoma	CYP1A1	emodin
Cancer	Breast Carcinoma	CYP1A1	emodin
Cancer	Breast Carcinoma	CYP1A1	emodin
Cancer	Breast Carcinoma	CYP1B1	emodin
Cancer	Breast Carcinoma	CYP2D6	emodin
Cancer	Breast Carcinoma	CYP3A4	emodin
Cancer	Breast Carcinoma	DDIT3	emodin
Cancer	Breast Carcinoma	DECR2	emodin
Cancer	Breast Carcinoma	DHFR	emodin
Cancer	Breast Carcinoma	DHRS12	emodin
Cancer	Breast Carcinoma	DHRS13	emodin
Cancer	Breast Carcinoma	DHRS2	emodin
Cancer	Breast Carcinoma	DHRS4	emodin
Cancer	Breast Carcinoma	DHRS4L2	emodin
Cancer	Breast Carcinoma	DHRS7B	emodin
Cancer	Breast Carcinoma	DHRS7C	emodin
Cancer	Breast Carcinoma	DNAJB1	emodin
Cancer	Breast Carcinoma	DNAJB1	emodin
Cancer	Breast Carcinoma	DYRK1A	emodin
Cancer	Breast Carcinoma	E2F5	emodin
Cancer	Breast Carcinoma	E2F5	emodin
Cancer	Breast Carcinoma	EED	emodin
Cancer	Breast Carcinoma	EGF	emodin
Cancer	Breast Carcinoma	EGFR	emodin
Cancer	Breast Carcinoma	EHMT2	emodin
Cancer	Breast Carcinoma	EI24	emodin
Cancer	Breast Carcinoma	EI24	emodin
Cancer	Breast Carcinoma	EIF2B1	emodin
Cancer	Breast Carcinoma	EIF2S2	emodin
Cancer	Breast Carcinoma	EMD	emodin
Cancer	Breast Carcinoma	EPHX2	emodin
Cancer	Breast Carcinoma	EPHX2	emodin
Cancer	Breast Carcinoma	ERBB2	emodin
Cancer	Breast Carcinoma	ERG	emodin
Cancer	Breast Carcinoma	ESR1	emodin
Cancer	Breast Carcinoma	ESR1	emodin
Cancer	Breast Carcinoma	ESR1	emodin
Cancer	Breast Carcinoma	ESR2	emodin
Cancer	Breast Carcinoma	ESR2	emodin
Cancer	Breast Carcinoma	ESR2	emodin
Cancer	Breast Carcinoma	EZR	emodin
Cancer	Breast Carcinoma	F8	emodin
Cancer	Breast Carcinoma	FASN	emodin
Cancer	Breast Carcinoma	FDX1	emodin
Cancer	Breast Carcinoma	FDX1L	emodin
Cancer	Breast Carcinoma	FEN1	emodin
Cancer	Breast Carcinoma	FKBP1A	emodin
Cancer	Breast Carcinoma	FMO1	emodin
Cancer	Breast Carcinoma	FMO2	emodin
Cancer	Breast Carcinoma	FMO5	emodin
Cancer	Breast Carcinoma	FN1	emodin
Cancer	Breast Carcinoma	FOXO1	emodin
Cancer	Breast Carcinoma	FOXO1	emodin
Cancer	Breast Carcinoma	FOXRED2	emodin
Cancer	Breast Carcinoma	GAS2	emodin
Cancer	Breast Carcinoma	GAS2	emodin
Cancer	Breast Carcinoma	GATA3	emodin
Cancer	Breast Carcinoma	GATA5	emodin
Cancer	Breast Carcinoma	GMNN	emodin
Cancer	Breast Carcinoma	GPX1	emodin
Cancer	Breast Carcinoma	GPX1	emodin
Cancer	Breast Carcinoma	GRB7	emodin
Cancer	Breast Carcinoma	GYS1	emodin
Cancer	Breast Carcinoma	GYS2	emodin
Cancer	Breast Carcinoma	HABP2	emodin
Cancer	Breast Carcinoma	HACD3	emodin
Cancer	Breast Carcinoma	HHAT	emodin
Cancer	Breast Carcinoma	HIF1A	emodin
Cancer	Breast Carcinoma	HPGD	emodin
Cancer	Breast Carcinoma	HSD17B1	emodin
Cancer	Breast Carcinoma	HSD17B13	emodin
Cancer	Breast Carcinoma	HSD17B8	emodin
Cancer	Breast Carcinoma	ID4	emodin
Cancer	Breast Carcinoma	IL10	emodin
Cancer	Breast Carcinoma	IL6	emodin
Cancer	Breast Carcinoma	IMPDH2	emodin
Cancer	Breast Carcinoma	ITPR1	emodin
Cancer	Breast Carcinoma	JUN	emodin
Cancer	Breast Carcinoma	KCNU1	emodin
Cancer	Breast Carcinoma	KLHDC10	emodin
Cancer	Breast Carcinoma	KLHDC9	emodin
Cancer	Breast Carcinoma	LARP6	emodin
Cancer	Breast Carcinoma	LARP6	emodin
Cancer	Breast Carcinoma	LCK	emodin
Cancer	Breast Carcinoma	LCK	emodin
Cancer	Breast Carcinoma	LYN	emodin
Cancer	Breast Carcinoma	MAP3K3	emodin
Cancer	Breast Carcinoma	MAP4K5	emodin
Cancer	Breast Carcinoma	MAPK11	emodin
Cancer	Breast Carcinoma	MAPK12	emodin
Cancer	Breast Carcinoma	MAPK13	emodin
Cancer	Breast Carcinoma	MAPK14	emodin
Cancer	Breast Carcinoma	MAPK15	emodin
Cancer	Breast Carcinoma	MAPKAPK2	emodin
Cancer	Breast Carcinoma	MAPKAPK5	emodin
Cancer	Breast Carcinoma	MAPRE1	emodin
Cancer	Breast Carcinoma	MAPRE2	emodin
Cancer	Breast Carcinoma	MAPT	emodin
Cancer	Breast Carcinoma	MAPT	emodin
Cancer	Breast Carcinoma	MBNL1	emodin
Cancer	Breast Carcinoma	MCL1	emodin
Cancer	Breast Carcinoma	MCL1	emodin
Cancer	Breast Carcinoma	MCL1	emodin
Cancer	Breast Carcinoma	MCM2	emodin
Cancer	Breast Carcinoma	MCM9	emodin
Cancer	Breast Carcinoma	MGAM	emodin
Cancer	Breast Carcinoma	MIOS	emodin
Cancer	Breast Carcinoma	MMP2	emodin
Cancer	Breast Carcinoma	MMP9	emodin
Cancer	Breast Carcinoma	MORF4L1	emodin
Cancer	Breast Carcinoma	MPHOSPH8	emodin
Cancer	Breast Carcinoma	MUSK	emodin
Cancer	Breast Carcinoma	NAE1	emodin
Cancer	Breast Carcinoma	NCKAP1	emodin
Cancer	Breast Carcinoma	NDOR1	emodin
Cancer	Breast Carcinoma	NDUFB11	emodin
Cancer	Breast Carcinoma	NEDD8-MDP1	emodin
Cancer	Breast Carcinoma	NEU2	emodin
Cancer	Breast Carcinoma	NFE2L2	emodin
Cancer	Breast Carcinoma	NFKBIA	emodin
Cancer	Breast Carcinoma	NFKBIA	emodin
Cancer	Breast Carcinoma	NKX3-1	emodin
Cancer	Breast Carcinoma	NOS2	emodin
Cancer	Breast Carcinoma	NOS3	emodin
Cancer	Breast Carcinoma	NPRL3	emodin
Cancer	Breast Carcinoma	NR1H2	emodin
Cancer	Breast Carcinoma	NR3C1	emodin
Cancer	Breast Carcinoma	OGFR	emodin
Cancer	Breast Carcinoma	OGFRL1	emodin
Cancer	Breast Carcinoma	P2RY12	emodin
Cancer	Breast Carcinoma	P2RY12	emodin
Cancer	Breast Carcinoma	PARP1	emodin
Cancer	Breast Carcinoma	PARP1	emodin
Cancer	Breast Carcinoma	PCNA	emodin
Cancer	Breast Carcinoma	PDCL	emodin
Cancer	Breast Carcinoma	PDP2	emodin
Cancer	Breast Carcinoma	PDPK1	emodin
Cancer	Breast Carcinoma	PDSS1	emodin
Cancer	Breast Carcinoma	PECR	emodin
Cancer	Breast Carcinoma	PGP	emodin
Cancer	Breast Carcinoma	PHLPP1	emodin
Cancer	Breast Carcinoma	PIK3C3	emodin
Cancer	Breast Carcinoma	PIK3C3	emodin
Cancer	Breast Carcinoma	PIK3CA	emodin
Cancer	Breast Carcinoma	PIM1	emodin
Cancer	Breast Carcinoma	PIN1	emodin
Cancer	Breast Carcinoma	PKN1	emodin
Cancer	Breast Carcinoma	PLAU	emodin
Cancer	Breast Carcinoma	PLK1	emodin
Cancer	Breast Carcinoma	PLPP1	emodin
Cancer	Breast Carcinoma	PLPP3	emodin
Cancer	Breast Carcinoma	PLPP4	emodin
Cancer	Breast Carcinoma	PLPP5	emodin
Cancer	Breast Carcinoma	PLPPR2	emodin
Cancer	Breast Carcinoma	POLB	emodin
Cancer	Breast Carcinoma	POLH	emodin
Cancer	Breast Carcinoma	POLI	emodin
Cancer	Breast Carcinoma	POLK	emodin
Cancer	Breast Carcinoma	POR	emodin
Cancer	Breast Carcinoma	PP2D1	emodin
Cancer	Breast Carcinoma	PPARG	emodin
Cancer	Breast Carcinoma	PPEF2	emodin
Cancer	Breast Carcinoma	PPM1D	emodin
Cancer	Breast Carcinoma	PPM1D	emodin
Cancer	Breast Carcinoma	PPM1E	emodin
Cancer	Breast Carcinoma	PPM1F	emodin
Cancer	Breast Carcinoma	PPM1N	emodin
Cancer	Breast Carcinoma	PPP2CA	emodin
Cancer	Breast Carcinoma	PPP2CB	emodin
Cancer	Breast Carcinoma	PPP3CB	emodin
Cancer	Breast Carcinoma	PPP4C	emodin
Cancer	Breast Carcinoma	PPP5C	emodin
Cancer	Breast Carcinoma	PPTC7	emodin
Cancer	Breast Carcinoma	PRKACG	emodin
Cancer	Breast Carcinoma	PRKAG2	emodin
Cancer	Breast Carcinoma	PRKCA	emodin
Cancer	Breast Carcinoma	PRKD1	emodin
Cancer	Breast Carcinoma	PTGS1	emodin
Cancer	Breast Carcinoma	PTGS2	emodin
Cancer	Breast Carcinoma	PTH1R	emodin
Cancer	Breast Carcinoma	PTPN6	emodin
Cancer	Breast Carcinoma	RABEPK	emodin
Cancer	Breast Carcinoma	RAD51	emodin
Cancer	Breast Carcinoma	RAF1	emodin
Cancer	Breast Carcinoma	RB1	emodin
Cancer	Breast Carcinoma	RB1	emodin
Cancer	Breast Carcinoma	RDH13	emodin
Cancer	Breast Carcinoma	RELA	emodin
Cancer	Breast Carcinoma	RFK	emodin
Cancer	Breast Carcinoma	ROCK1	emodin
Cancer	Breast Carcinoma	ROCK2	emodin
Cancer	Breast Carcinoma	RPS6KA1	emodin
Cancer	Breast Carcinoma	RPS6KA5	emodin
Cancer	Breast Carcinoma	RPS6KB1	emodin
Cancer	Breast Carcinoma	RXRA	emodin
Cancer	Breast Carcinoma	SAE1	emodin
Cancer	Breast Carcinoma	SAE1	emodin
Cancer	Breast Carcinoma	SAFB2	emodin
Cancer	Breast Carcinoma	SDR16C5	emodin
Cancer	Breast Carcinoma	SEC61G	emodin
Cancer	Breast Carcinoma	SELE	emodin
Cancer	Breast Carcinoma	SEPSECS	emodin
Cancer	Breast Carcinoma	SGPL1	emodin
Cancer	Breast Carcinoma	SGPP1	emodin
Cancer	Breast Carcinoma	SGPP2	emodin
Cancer	Breast Carcinoma	SH3GL1	emodin
Cancer	Breast Carcinoma	SIRT4	emodin
Cancer	Breast Carcinoma	SKAP1	emodin
Cancer	Breast Carcinoma	SLC2A4	emodin
Cancer	Breast Carcinoma	SLC35A2	emodin
Cancer	Breast Carcinoma	SLCO1B1	emodin
Cancer	Breast Carcinoma	SLCO1B1	emodin
Cancer	Breast Carcinoma	SLIRP	emodin
Cancer	Breast Carcinoma	SRC	emodin
Cancer	Breast Carcinoma	SRC	emodin
Cancer	Breast Carcinoma	ST8SIA1	emodin
Cancer	Breast Carcinoma	ST8SIA1	emodin
Cancer	Breast Carcinoma	STAT3	emodin
Cancer	Breast Carcinoma	STIP1	emodin
Cancer	Breast Carcinoma	SUPT20H	emodin
Cancer	Breast Carcinoma	SUPT20H	emodin
Cancer	Breast Carcinoma	TAB1	emodin
Cancer	Breast Carcinoma	TBCC	emodin
Cancer	Breast Carcinoma	TDP1	emodin
Cancer	Breast Carcinoma	TGFB1	emodin
Cancer	Breast Carcinoma	THPO	emodin
Cancer	Breast Carcinoma	TMEM63B	emodin
Cancer	Breast Carcinoma	TMEM63C	emodin
Cancer	Breast Carcinoma	TNF	emodin
Cancer	Breast Carcinoma	TNF	emodin
Cancer	Breast Carcinoma	TOP2A	emodin
Cancer	Breast Carcinoma	TOP2A	emodin
Cancer	Breast Carcinoma	TP53	emodin
Cancer	Breast Carcinoma	TRAF2	emodin
Cancer	Breast Carcinoma	TRAF2	emodin
Cancer	Breast Carcinoma	TRAF2	emodin
Cancer	Breast Carcinoma	TSGA13	emodin
Cancer	Breast Carcinoma	TXNIP	emodin
Cancer	Breast Carcinoma	TYW1	emodin
Cancer	Breast Carcinoma	UGT1A10	emodin
Cancer	Breast Carcinoma	UGT1A6	emodin
Cancer	Breast Carcinoma	UGT1A7	emodin
Cancer	Breast Carcinoma	UGT1A8	emodin
Cancer	Breast Carcinoma	UGT1A9	emodin
Cancer	Breast Carcinoma	UGT2B15	emodin
Cancer	Breast Carcinoma	UGT2B15	emodin
Cancer	Breast Carcinoma	UGT2B7	emodin
Cancer	Breast Carcinoma	USP1	emodin
Cancer	Breast Carcinoma	VDR	emodin
Cancer	Breast Carcinoma	VEGFA	emodin
Cancer	Breast Carcinoma	WARS2	emodin
Cancer	Breast Carcinoma	ZFAND4	emodin
Cancer	Breast Carcinoma	ZGLP1	emodin
Cancer	Breast Carcinoma	ANGPT2	lupeol
Cancer	Breast Carcinoma	ANGPT4	lupeol
Cancer	Breast Carcinoma	CAT	lupeol
Cancer	Breast Carcinoma	CDC42	lupeol
Cancer	Breast Carcinoma	CRYZL1	lupeol
Cancer	Breast Carcinoma	CTNNB1	lupeol
Cancer	Breast Carcinoma	CYP3A4	lupeol
Cancer	Breast Carcinoma	CYTB	lupeol
Cancer	Breast Carcinoma	EIF3A	lupeol
Cancer	Breast Carcinoma	FDPS	lupeol
Cancer	Breast Carcinoma	GPATCH1	lupeol
Cancer	Breast Carcinoma	HMGCS1	lupeol
Cancer	Breast Carcinoma	IDI2	lupeol
Cancer	Breast Carcinoma	IKZF5	lupeol
Cancer	Breast Carcinoma	LARP6	lupeol
Cancer	Breast Carcinoma	LSS	lupeol
Cancer	Breast Carcinoma	MECR	lupeol
Cancer	Breast Carcinoma	MVD	lupeol
Cancer	Breast Carcinoma	NUDT21	lupeol
Cancer	Breast Carcinoma	PMVK	lupeol
Cancer	Breast Carcinoma	POLH	lupeol
Cancer	Breast Carcinoma	POLI	lupeol
Cancer	Breast Carcinoma	POLK	lupeol
Cancer	Breast Carcinoma	PPEF2	lupeol
Cancer	Breast Carcinoma	PPP2CA	lupeol
Cancer	Breast Carcinoma	PPP2CB	lupeol
Cancer	Breast Carcinoma	PPP3CB	lupeol
Cancer	Breast Carcinoma	PPP4C	lupeol
Cancer	Breast Carcinoma	PPP5C	lupeol
Cancer	Breast Carcinoma	PSPH	lupeol
Cancer	Breast Carcinoma	PTEN	lupeol
Cancer	Breast Carcinoma	PTPN1	lupeol
Cancer	Breast Carcinoma	REV1	lupeol
Cancer	Breast Carcinoma	RTN4IP1	lupeol
Cancer	Breast Carcinoma	RUSC1	lupeol
Cancer	Breast Carcinoma	SP1	lupeol
Cancer	Breast Carcinoma	STXBP1	lupeol
Cancer	Breast Carcinoma	STXBP2	lupeol
Cancer	Breast Carcinoma	STXBP3	lupeol
Cancer	Breast Carcinoma	TOP1	lupeol
Cancer	Breast Carcinoma	TOP2A	lupeol
Cancer	Breast Carcinoma	TOP2A	lupeol
Cancer	Breast Carcinoma	TP53	lupeol
Cancer	Breast Carcinoma	VAT1	lupeol
Cancer	Breast Carcinoma	VAT1L	lupeol
Cancer	Breast Carcinoma	ABCB1	oleanolic acid
Cancer	Breast Carcinoma	ACACB	oleanolic acid
Cancer	Breast Carcinoma	ACSF3	oleanolic acid
Cancer	Breast Carcinoma	AKR1B1	oleanolic acid
Cancer	Breast Carcinoma	ATAD5	oleanolic acid
Cancer	Breast Carcinoma	CARNS1	oleanolic acid
Cancer	Breast Carcinoma	CASP3	oleanolic acid
Cancer	Breast Carcinoma	CASP8	oleanolic acid
Cancer	Breast Carcinoma	CAT	oleanolic acid
Cancer	Breast Carcinoma	CBX1	oleanolic acid
Cancer	Breast Carcinoma	CCND1	oleanolic acid
Cancer	Breast Carcinoma	CDC45	oleanolic acid
Cancer	Breast Carcinoma	CKM	oleanolic acid
Cancer	Breast Carcinoma	CRYZL1	oleanolic acid
Cancer	Breast Carcinoma	CUL3	oleanolic acid
Cancer	Breast Carcinoma	CYP19A1	oleanolic acid
Cancer	Breast Carcinoma	CYP19A1	oleanolic acid
Cancer	Breast Carcinoma	DUSP3	oleanolic acid
Cancer	Breast Carcinoma	DUSP3	oleanolic acid
Cancer	Breast Carcinoma	F3	oleanolic acid
Cancer	Breast Carcinoma	GANAB	oleanolic acid
Cancer	Breast Carcinoma	GANC	oleanolic acid
Cancer	Breast Carcinoma	GMNN	oleanolic acid
Cancer	Breast Carcinoma	GPBAR1	oleanolic acid
Cancer	Breast Carcinoma	GPX1	oleanolic acid
Cancer	Breast Carcinoma	GPX2	oleanolic acid
Cancer	Breast Carcinoma	HMGCS1	oleanolic acid
Cancer	Breast Carcinoma	HMOX1	oleanolic acid
Cancer	Breast Carcinoma	HSD17B2	oleanolic acid
Cancer	Breast Carcinoma	IDI2	oleanolic acid
Cancer	Breast Carcinoma	KEAP1	oleanolic acid
Cancer	Breast Carcinoma	LSS	oleanolic acid
Cancer	Breast Carcinoma	MET	oleanolic acid
Cancer	Breast Carcinoma	MYORG	oleanolic acid
Cancer	Breast Carcinoma	NFE2L2	oleanolic acid
Cancer	Breast Carcinoma	NOS2	oleanolic acid
Cancer	Breast Carcinoma	NQO1	oleanolic acid
Cancer	Breast Carcinoma	PLA2G1B	oleanolic acid
Cancer	Breast Carcinoma	PLA2G1B	oleanolic acid
Cancer	Breast Carcinoma	PLK1	oleanolic acid
Cancer	Breast Carcinoma	POLB	oleanolic acid
Cancer	Breast Carcinoma	POLB	oleanolic acid
Cancer	Breast Carcinoma	POLH	oleanolic acid
Cancer	Breast Carcinoma	POLI	oleanolic acid
Cancer	Breast Carcinoma	POLK	oleanolic acid
Cancer	Breast Carcinoma	PPARA	oleanolic acid
Cancer	Breast Carcinoma	PTEN	oleanolic acid
Cancer	Breast Carcinoma	PTGIR	oleanolic acid
Cancer	Breast Carcinoma	PTGS1	oleanolic acid
Cancer	Breast Carcinoma	PTGS2	oleanolic acid
Cancer	Breast Carcinoma	PTGS2	oleanolic acid
Cancer	Breast Carcinoma	PTPN1	oleanolic acid
Cancer	Breast Carcinoma	PTPN1	oleanolic acid
Cancer	Breast Carcinoma	PTPN6	oleanolic acid
Cancer	Breast Carcinoma	PTPN6	oleanolic acid
Cancer	Breast Carcinoma	PTPN7	oleanolic acid
Cancer	Breast Carcinoma	PTPRA	oleanolic acid
Cancer	Breast Carcinoma	RAPGEF4	oleanolic acid
Cancer	Breast Carcinoma	RB1	oleanolic acid
Cancer	Breast Carcinoma	RELA	oleanolic acid
Cancer	Breast Carcinoma	REV1	oleanolic acid
Cancer	Breast Carcinoma	RHAG	oleanolic acid
Cancer	Breast Carcinoma	RNASE3	oleanolic acid
Cancer	Breast Carcinoma	RTN4IP1	oleanolic acid
Cancer	Breast Carcinoma	SCO2	oleanolic acid
Cancer	Breast Carcinoma	SLC10A1	oleanolic acid
Cancer	Breast Carcinoma	SLCO1B1	oleanolic acid
Cancer	Breast Carcinoma	SLCO1B1	oleanolic acid
Cancer	Breast Carcinoma	STAT3	oleanolic acid
Cancer	Breast Carcinoma	STMN4	oleanolic acid
Cancer	Breast Carcinoma	TDP1	oleanolic acid
Cancer	Breast Carcinoma	TOP1	oleanolic acid
Cancer	Breast Carcinoma	TOP2A	oleanolic acid
Cancer	Breast Carcinoma	UGT1A10	oleanolic acid
Cancer	Breast Carcinoma	UGT1A7	oleanolic acid
Cancer	Breast Carcinoma	UGT1A8	oleanolic acid
Cancer	Breast Carcinoma	UGT1A9	oleanolic acid
Cancer	Breast Carcinoma	UGT2B11	oleanolic acid
Cancer	Breast Carcinoma	VAT1	oleanolic acid
Cancer	Breast Carcinoma	VAT1L	oleanolic acid
Cancer	Breast Carcinoma	YWHAE	oleanolic acid
Cancer	Breast Carcinoma	AIP	physcion
Cancer	Breast Carcinoma	ALOX15	physcion
Cancer	Breast Carcinoma	ATP6AP1	physcion
Cancer	Breast Carcinoma	BAX	physcion
Cancer	Breast Carcinoma	CXCL13	physcion
Cancer	Breast Carcinoma	EPHX2	physcion
Cancer	Breast Carcinoma	EPHX2	physcion
Cancer	Breast Carcinoma	ESR1	physcion
Cancer	Breast Carcinoma	HPGD	physcion
Cancer	Breast Carcinoma	IFNB1	physcion
Cancer	Breast Carcinoma	KDM4E	physcion
Cancer	Breast Carcinoma	LARP6	physcion
Cancer	Breast Carcinoma	LCK	physcion
Cancer	Breast Carcinoma	MAP3K2	physcion
Cancer	Breast Carcinoma	MAP3K3	physcion
Cancer	Breast Carcinoma	MAPT	physcion
Cancer	Breast Carcinoma	MCL1	physcion
Cancer	Breast Carcinoma	MGAM	physcion
Cancer	Breast Carcinoma	NOG	physcion
Cancer	Breast Carcinoma	NPRL3	physcion
Cancer	Breast Carcinoma	P2RY12	physcion
Cancer	Breast Carcinoma	P2RY12	physcion
Cancer	Breast Carcinoma	PARP1	physcion
Cancer	Breast Carcinoma	POLK	physcion
Cancer	Breast Carcinoma	POLL	physcion
Cancer	Breast Carcinoma	PPWD1	physcion
Cancer	Breast Carcinoma	PTPN1	physcion
Cancer	Breast Carcinoma	SLC25A10	physcion
Cancer	Breast Carcinoma	SLC25A11	physcion
Cancer	Breast Carcinoma	SLCO1B1	physcion
Cancer	Breast Carcinoma	SLCO1B1	physcion
Cancer	Breast Carcinoma	SPX	physcion
Cancer	Breast Carcinoma	TWSG1	physcion
Cancer	Breast Carcinoma	UGT1A9	physcion
Cancer	Breast Carcinoma	USP1	physcion
Cancer	Breast Carcinoma	VDR	physcion
Cancer	Breast Carcinoma	INS	stigmastane-3,6-dione
Cancer	Breast Carcinoma	TGM2	stigmastane-3,6-dione
Cancer	Breast Carcinoma	TGM3	stigmastane-3,6-dione
Cancer	Breast Carcinoma	TGM4	stigmastane-3,6-dione
Cancer	Breast Carcinoma	TGM5	stigmastane-3,6-dione
Cancer	Breast Carcinoma	TGM6	stigmastane-3,6-dione
Cancer	Breast Carcinoma	TGM7	stigmastane-3,6-dione
Cancer	Bronchogenic Carcinoma	AKR1A1	chrysophanol
Cancer	Bronchogenic Carcinoma	AKR1B10	chrysophanol
Cancer	Bronchogenic Carcinoma	RERG	chrysophanol
Cancer	Bronchogenic Carcinoma	RHEB	chrysophanol
Cancer	Bronchogenic Carcinoma	RHOD	chrysophanol
Cancer	Bronchogenic Carcinoma	RHOJ	chrysophanol
Cancer	Bronchogenic Carcinoma	RORC	chrysophanol
Cancer	Bronchogenic Carcinoma	CELA3A	citreorosein
Cancer	Bronchogenic Carcinoma	MASP1	citreorosein
Cancer	Bronchogenic Carcinoma	PLPP2	citreorosein
Cancer	Bronchogenic Carcinoma	TMPRSS2	citreorosein
Cancer	Bronchogenic Carcinoma	TMPRSS4	citreorosein
Cancer	Bronchogenic Carcinoma	AKR1A1	emodin
Cancer	Bronchogenic Carcinoma	AKR1B10	emodin
Cancer	Bronchogenic Carcinoma	E2F5	emodin
Cancer	Bronchogenic Carcinoma	E2F5	emodin
Cancer	Bronchogenic Carcinoma	ERG	emodin
Cancer	Bronchogenic Carcinoma	FMO2	emodin
Cancer	Bronchogenic Carcinoma	PHEX	emodin
Cancer	Bronchogenic Carcinoma	PLPP2	emodin
Cancer	Bronchogenic Carcinoma	PRDX6	emodin
Cancer	Bronchogenic Carcinoma	PRKD1	emodin
Cancer	Bronchogenic Carcinoma	RGS4	emodin
Cancer	Bronchogenic Carcinoma	RORC	emodin
Cancer	Bronchogenic Carcinoma	SSRP1	emodin
Cancer	Bronchogenic Carcinoma	TOP2B	emodin
Cancer	Bronchogenic Carcinoma	CPVL	lupeol
Cancer	Bronchogenic Carcinoma	TP53I3	lupeol
Cancer	Bronchogenic Carcinoma	AKR1B10	oleanolic acid
Cancer	Bronchogenic Carcinoma	AKR1B10	oleanolic acid
Cancer	Bronchogenic Carcinoma	CPVL	oleanolic acid
Cancer	Bronchogenic Carcinoma	PLA2G1B	oleanolic acid
Cancer	Bronchogenic Carcinoma	PLA2G1B	oleanolic acid
Cancer	Bronchogenic Carcinoma	TP53I3	oleanolic acid
Cancer	Carcinoma of lung	AKR1A1	chrysophanol
Cancer	Carcinoma of lung	DCLRE1C	chrysophanol
Cancer	Carcinoma of lung	RHOD	chrysophanol
Cancer	Carcinoma of lung	PLPP2	citreorosein
Cancer	Carcinoma of lung	AKR1A1	emodin
Cancer	Carcinoma of lung	COPS8	emodin
Cancer	Carcinoma of lung	ERG	emodin
Cancer	Carcinoma of lung	MAPKAPK5	emodin
Cancer	Carcinoma of lung	MAPRE3	emodin
Cancer	Carcinoma of lung	MBNL1	emodin
Cancer	Carcinoma of lung	PHEX	emodin
Cancer	Carcinoma of lung	PLPP2	emodin
Cancer	Carcinoma of lung	PPP3CA	emodin
Cancer	Carcinoma of lung	PRDX6	emodin
Cancer	Carcinoma of lung	PRKD1	emodin
Cancer	Carcinoma of lung	SSRP1	emodin
Cancer	Carcinoma of lung	TOP2B	emodin
Cancer	Carcinoma of lung	PPP3CA	lupeol
Cancer	Carcinoma of lung	TGM5	stigmastane-3,6-dione
Cancer	Carcinoma, Large Cell	ARL1	chrysophanol
Cancer	Carcinoma, Large Cell	ARL10	chrysophanol
Cancer	Carcinoma, Large Cell	ARL17A	chrysophanol
Cancer	Carcinoma, Large Cell	ARL4A	chrysophanol
Cancer	Carcinoma, Large Cell	CDC42	chrysophanol
Cancer	Carcinoma, Large Cell	EPHX2	chrysophanol
Cancer	Carcinoma, Large Cell	EPHX2	chrysophanol
Cancer	Carcinoma, Large Cell	RAB25	chrysophanol
Cancer	Carcinoma, Large Cell	RERG	chrysophanol
Cancer	Carcinoma, Large Cell	RHOBTB2	chrysophanol
Cancer	Carcinoma, Large Cell	RHOBTB3	chrysophanol
Cancer	Carcinoma, Large Cell	RHOD	chrysophanol
Cancer	Carcinoma, Large Cell	RHOJ	chrysophanol
Cancer	Carcinoma, Large Cell	RRAS2	chrysophanol
Cancer	Carcinoma, Large Cell	TMPRSS11D	chrysophanol
Cancer	Carcinoma, Large Cell	ATP5IF1	citreorosein
Cancer	Carcinoma, Large Cell	CFI	citreorosein
Cancer	Carcinoma, Large Cell	GZMA	citreorosein
Cancer	Carcinoma, Large Cell	GZMB	citreorosein
Cancer	Carcinoma, Large Cell	KLK1	citreorosein
Cancer	Carcinoma, Large Cell	PLPP2	citreorosein
Cancer	Carcinoma, Large Cell	PRSS12	citreorosein
Cancer	Carcinoma, Large Cell	PRSS21	citreorosein
Cancer	Carcinoma, Large Cell	PRSS8	citreorosein
Cancer	Carcinoma, Large Cell	PRTN3	citreorosein
Cancer	Carcinoma, Large Cell	SLC25A45	citreorosein
Cancer	Carcinoma, Large Cell	ST14	citreorosein
Cancer	Carcinoma, Large Cell	TMPRSS11D	citreorosein
Cancer	Carcinoma, Large Cell	TYR	citreorosein
Cancer	Carcinoma, Large Cell	CBR3	emodin
Cancer	Carcinoma, Large Cell	CEBPG	emodin
Cancer	Carcinoma, Large Cell	DHRS1	emodin
Cancer	Carcinoma, Large Cell	DHRSX	emodin
Cancer	Carcinoma, Large Cell	EPHX2	emodin
Cancer	Carcinoma, Large Cell	EPHX2	emodin
Cancer	Carcinoma, Large Cell	HDC	emodin
Cancer	Carcinoma, Large Cell	ID4	emodin
Cancer	Carcinoma, Large Cell	IMPDH1	emodin
Cancer	Carcinoma, Large Cell	KDM4A	emodin
Cancer	Carcinoma, Large Cell	KLHDC3	emodin
Cancer	Carcinoma, Large Cell	LARP6	emodin
Cancer	Carcinoma, Large Cell	LARP6	emodin
Cancer	Carcinoma, Large Cell	LYN	emodin
Cancer	Carcinoma, Large Cell	MAPK9	emodin
Cancer	Carcinoma, Large Cell	NID1	emodin
Cancer	Carcinoma, Large Cell	PIM1	emodin
Cancer	Carcinoma, Large Cell	PLPP2	emodin
Cancer	Carcinoma, Large Cell	PPM1B	emodin
Cancer	Carcinoma, Large Cell	PPM1L	emodin
Cancer	Carcinoma, Large Cell	RIOK1	emodin
Cancer	Carcinoma, Large Cell	TMEM63A	emodin
Cancer	Carcinoma, Large Cell	TMPRSS11D	emodin
Cancer	Carcinoma, Large Cell	ANGPT1	lupeol
Cancer	Carcinoma, Large Cell	CDC42	lupeol
Cancer	Carcinoma, Large Cell	CPVL	lupeol
Cancer	Carcinoma, Large Cell	LARP6	lupeol
Cancer	Carcinoma, Large Cell	TMPRSS11D	lupeol
Cancer	Carcinoma, Large Cell	CPVL	oleanolic acid
Cancer	Carcinoma, Large Cell	NAMPT	oleanolic acid
Cancer	Carcinoma, Large Cell	NFE2	oleanolic acid
Cancer	Carcinoma, Large Cell	UGT2B10	oleanolic acid
Cancer	Carcinoma, Large Cell	EPHX2	physcion
Cancer	Carcinoma, Large Cell	EPHX2	physcion
Cancer	Carcinoma, Large Cell	FOXG1	physcion
Cancer	Carcinoma, Large Cell	KLHDC3	physcion
Cancer	Carcinoma, Large Cell	LARP6	physcion
Cancer	Carcinoma, Spindle-Cell	ALDH1A1	chrysophanol
Cancer	Carcinoma, Spindle-Cell	ARL10	chrysophanol
Cancer	Carcinoma, Spindle-Cell	ARL9	chrysophanol
Cancer	Carcinoma, Spindle-Cell	BRCA1	chrysophanol
Cancer	Carcinoma, Spindle-Cell	CCDC80	chrysophanol
Cancer	Carcinoma, Spindle-Cell	CDC42	chrysophanol
Cancer	Carcinoma, Spindle-Cell	DIRAS1	chrysophanol
Cancer	Carcinoma, Spindle-Cell	DIRAS2	chrysophanol
Cancer	Carcinoma, Spindle-Cell	DIRAS3	chrysophanol
Cancer	Carcinoma, Spindle-Cell	DNAJC27	chrysophanol
Cancer	Carcinoma, Spindle-Cell	GART	chrysophanol
Cancer	Carcinoma, Spindle-Cell	HRAS	chrysophanol
Cancer	Carcinoma, Spindle-Cell	KRAS	chrysophanol
Cancer	Carcinoma, Spindle-Cell	KYAT1	chrysophanol
Cancer	Carcinoma, Spindle-Cell	MRRF	chrysophanol
Cancer	Carcinoma, Spindle-Cell	NRAS	chrysophanol
Cancer	Carcinoma, Spindle-Cell	PPWD1	chrysophanol
Cancer	Carcinoma, Spindle-Cell	RAB25	chrysophanol
Cancer	Carcinoma, Spindle-Cell	RAC3	chrysophanol
Cancer	Carcinoma, Spindle-Cell	RALB	chrysophanol
Cancer	Carcinoma, Spindle-Cell	RASD2	chrysophanol
Cancer	Carcinoma, Spindle-Cell	RASL10A	chrysophanol
Cancer	Carcinoma, Spindle-Cell	RHOA	chrysophanol
Cancer	Carcinoma, Spindle-Cell	RHOH	chrysophanol
Cancer	Carcinoma, Spindle-Cell	RHOJ	chrysophanol
Cancer	Carcinoma, Spindle-Cell	RND2	chrysophanol
Cancer	Carcinoma, Spindle-Cell	RND3	chrysophanol
Cancer	Carcinoma, Spindle-Cell	RRAD	chrysophanol
Cancer	Carcinoma, Spindle-Cell	RRAS2	chrysophanol
Cancer	Carcinoma, Spindle-Cell	SLC25A10	chrysophanol
Cancer	Carcinoma, Spindle-Cell	SLCO1B3	chrysophanol
Cancer	Carcinoma, Spindle-Cell	SLCO1B3	chrysophanol
Cancer	Carcinoma, Spindle-Cell	TSHR	chrysophanol
Cancer	Carcinoma, Spindle-Cell	ATP5IF1	citreorosein
Cancer	Carcinoma, Spindle-Cell	CFD	citreorosein
Cancer	Carcinoma, Spindle-Cell	GZMA	citreorosein
Cancer	Carcinoma, Spindle-Cell	ALDH1A1	emodin
Cancer	Carcinoma, Spindle-Cell	ALG2	emodin
Cancer	Carcinoma, Spindle-Cell	BCL2	emodin
Cancer	Carcinoma, Spindle-Cell	BCL2	emodin
Cancer	Carcinoma, Spindle-Cell	BCL2L1	emodin
Cancer	Carcinoma, Spindle-Cell	CBR3	emodin
Cancer	Carcinoma, Spindle-Cell	CDK4	emodin
Cancer	Carcinoma, Spindle-Cell	CDK4	emodin
Cancer	Carcinoma, Spindle-Cell	DHRS1	emodin
Cancer	Carcinoma, Spindle-Cell	EPHX1	emodin
Cancer	Carcinoma, Spindle-Cell	ESR2	emodin
Cancer	Carcinoma, Spindle-Cell	ESR2	emodin
Cancer	Carcinoma, Spindle-Cell	ESR2	emodin
Cancer	Carcinoma, Spindle-Cell	EZR	emodin
Cancer	Carcinoma, Spindle-Cell	FN1	emodin
Cancer	Carcinoma, Spindle-Cell	GATA3	emodin
Cancer	Carcinoma, Spindle-Cell	HSPB1	emodin
Cancer	Carcinoma, Spindle-Cell	ID4	emodin
Cancer	Carcinoma, Spindle-Cell	PDP2	emodin
Cancer	Carcinoma, Spindle-Cell	PPP3CC	emodin
Cancer	Carcinoma, Spindle-Cell	PRDX6	emodin
Cancer	Carcinoma, Spindle-Cell	PRKAA2	emodin
Cancer	Carcinoma, Spindle-Cell	PRKAG1	emodin
Cancer	Carcinoma, Spindle-Cell	PTGS1	emodin
Cancer	Carcinoma, Spindle-Cell	RB1	emodin
Cancer	Carcinoma, Spindle-Cell	RB1	emodin
Cancer	Carcinoma, Spindle-Cell	RDH11	emodin
Cancer	Carcinoma, Spindle-Cell	RGS4	emodin
Cancer	Carcinoma, Spindle-Cell	RHOA	emodin
Cancer	Carcinoma, Spindle-Cell	RHOA	emodin
Cancer	Carcinoma, Spindle-Cell	SAFB	emodin
Cancer	Carcinoma, Spindle-Cell	SGK1	emodin
Cancer	Carcinoma, Spindle-Cell	SLCO1B3	emodin
Cancer	Carcinoma, Spindle-Cell	SLCO1B3	emodin
Cancer	Carcinoma, Spindle-Cell	STAT3	emodin
Cancer	Carcinoma, Spindle-Cell	TGFB1	emodin
Cancer	Carcinoma, Spindle-Cell	TRPS1	emodin
Cancer	Carcinoma, Spindle-Cell	TSHR	emodin
Cancer	Carcinoma, Spindle-Cell	UGT1A3	emodin
Cancer	Carcinoma, Spindle-Cell	WARS	emodin
Cancer	Carcinoma, Spindle-Cell	CDC42	lupeol
Cancer	Carcinoma, Spindle-Cell	CPVL	lupeol
Cancer	Carcinoma, Spindle-Cell	CRYZ	lupeol
Cancer	Carcinoma, Spindle-Cell	EIF3A	lupeol
Cancer	Carcinoma, Spindle-Cell	GPATCH1	lupeol
Cancer	Carcinoma, Spindle-Cell	PPP3CC	lupeol
Cancer	Carcinoma, Spindle-Cell	RHOA	lupeol
Cancer	Carcinoma, Spindle-Cell	STXBP2	lupeol
Cancer	Carcinoma, Spindle-Cell	TP53I3	lupeol
Cancer	Carcinoma, Spindle-Cell	CCND1	oleanolic acid
Cancer	Carcinoma, Spindle-Cell	CPVL	oleanolic acid
Cancer	Carcinoma, Spindle-Cell	MET	oleanolic acid
Cancer	Carcinoma, Spindle-Cell	NAMPT	oleanolic acid
Cancer	Carcinoma, Spindle-Cell	NMU	oleanolic acid
Cancer	Carcinoma, Spindle-Cell	PPARA	oleanolic acid
Cancer	Carcinoma, Spindle-Cell	PTGS1	oleanolic acid
Cancer	Carcinoma, Spindle-Cell	PTPRF	oleanolic acid
Cancer	Carcinoma, Spindle-Cell	PTPRF	oleanolic acid
Cancer	Carcinoma, Spindle-Cell	RB1	oleanolic acid
Cancer	Carcinoma, Spindle-Cell	SLCO1B3	oleanolic acid
Cancer	Carcinoma, Spindle-Cell	SLCO1B3	oleanolic acid
Cancer	Carcinoma, Spindle-Cell	STAT3	oleanolic acid
Cancer	Carcinoma, Spindle-Cell	TP53I3	oleanolic acid
Cancer	Carcinoma, Spindle-Cell	UGT1A3	oleanolic acid
Cancer	Carcinoma, Spindle-Cell	ALDH1A1	physcion
Cancer	Carcinoma, Spindle-Cell	PPWD1	physcion
Cancer	Carcinoma, Spindle-Cell	SLC25A10	physcion
Cancer	Carcinoma, Spindle-Cell	SLCO1B3	physcion
Cancer	Carcinoma, Spindle-Cell	SLCO1B3	physcion
Cancer	Carcinoma, Spindle-Cell	TES	physcion
Cancer	Carcinoma, Spindle-Cell	TNS1	physcion
Cancer	Carcinosarcoma	ARF3	chrysophanol
[truncated: 14,776 more rows]
