# Supplementary material for: Association Rule Mining and In silico Analysis of Ethiopian Traditional Medicine Prescription
Source: Research Square preprint supplement (doi:10.21203/rs.3.rs-4652485/v1), 2024-07-25
Supplement: Supplementary file 2 [file 708b940d958ef2ba347e5e92.xlsx]

## Sheet: KEGG pathways
Association Rule Mining and In silico Analysis of Ethiopian Traditional Medicine Prescription Lemessa Etana Bultum1,2,3*, Gwangmin Kim1,2 , Seon-Woo Lee 3, and Doheon Lee1,2* 1Department of Bio and Brain Engineering, Korea Advanced Institute of Science and Technology (KAIST), 291Daehak-ro, Daejeon 34141, South Korea. 2Bio-Synergy Research Center, 291Daehak-ro, 34141 Daejeon, South Korea. 3Institu…
Gene_set	Term	P-value	Adjusted P-value	Old P-value	Old Adjusted P-value	Odds Ratio	Combined Score	Genes
KEGG_2021_Human	Lipid and atherosclerosis	2.35973e-34	6.9848e-32	0	0	10.3575	801.975	GSK3B;CXCL8;TNF;CXCL2;ICAM1;PPP3CA;PPP3CB;PPP3CC;CASP8;CASP3;CASP1;AKT1;RAC1;JAK2;HRAS;PDPK1;PRKCA;TRAF2;MMP9;RHOA;PIK3CA;DDIT3;PPARG;TP53;ROCK2;SRC;ITPR1;RELA;RAP1B;CDC42;MAPK9;NRAS;RXRA;RAP1A;NLRP3;MAPK1;LYN;JUN;IFNB1;NOS3;STAT3;MAPK14;SELE;NFKB1;MAPK12;MAPK13;NFKBIA;CYP2C9;MAPK11;IL6;CYP1A1;BCL2;CYCS;BAX;KRAS;TAB1;CALM2;BCL2L1;NFE2L2
KEGG_2021_Human	Chemical carcinogenesis	1.37801e-31	2.03945e-29	0	0	8.96522	637.064	RB1;UGT1A10;AHR;CCND1;PRKACG;RPS6KA1;AKT1;CYP1B1;JAK2;HRAS;UGT2B10;CBR1;MAP2K1;UGT2B11;UGT1A1;UGT2B15;AIP;HSD11B1L;PRKCA;AR;PIK3CA;BIRC5;PPARA;RAF1;UGT2B7;SRC;PTGS2;CYP2C19;CYP3A4;RELA;EGFR;NRAS;RXRA;UGT1A5;MAPK1;UGT1A4;UGT1A3;UGT1A9;UGT1A8;UGT1A7;UGT1A6;GSTM3;JUN;VDR;EGF;EPHX2;STAT3;EPHX1;EPHX3;ESR1;NFKB1;ESR2;VEGFA;CYP2C9;RPS6KB1;CYP1A2;CYP1A1;BCL2;KRAS
KEGG_2021_Human	Pathways in cancer	5.8298e-31	5.75207e-29	0	0	5.42249	377.498	RB1;GSK3B;CXCL8;PTEN;KEAP1;RPS6KA5;CASP8;CCND1;PRKACG;CASP3;PIM1;RAC2;AKT1;RAC3;RAC1;POLK;JAK2;HRAS;JAK1;NKX3-1;PDGFRA;MAP2K1;HGF;MMP2;PRKCA;MITF;TRAF2;F2;MMP9;RHOA;AR;PIK3CA;BIRC5;PPARG;RAF1;MET;TP53;PPARD;RALA;RALB;ROCK1;ROCK2;HDAC1;LAMA1;CXCR4;KLK3;PTGS2;HIF1A;EGFR;FOXO1;RELA;CDC42;MAPK9;NRAS;RXRA;ERBB2;HMOX1;MAPK1;GSTM3;NQO1;JUN;TGFB1;NOS2;EGF;TXNRD1;STAT3;FN1;ESR1;NFKB1;ESR2;VEGFA;NFKBIA;IL6…
KEGG_2021_Human	Kaposi sarcoma-associated herpesvirus infection	5.82382e-30	4.30963e-28	0	0	10.0072	673.642	RB1;GSK3B;CSF2;CXCL8;CXCL2;ICAM1;PPP3CA;PPP3CB;PPP3CC;CASP8;CCND1;CASP3;AKT1;RAC1;JAK2;HRAS;JAK1;MAP2K1;SYK;TRAF2;PIK3CA;MAPKAPK2;PIK3C3;RAF1;TP53;SRC;ITPR1;PTGS2;HIF1A;RELA;MAPK9;NRAS;MAPK1;LYN;JUN;ANGPT2;IFNB1;STAT3;MAPK14;NFKB1;MAPK12;VEGFA;MAPK13;NFKBIA;MAPK11;IL6;CDK4;CTNNB1;CYCS;BAX;KRAS;CALM2
KEGG_2021_Human	AGE-RAGE signaling pathway in diabetic complications	1.3002e-29	7.69718e-28	0	0	17.1054	1137.72	CXCL8;SERPINE1;TNF;FOXO1;RELA;ICAM1;CDC42;MAPK9;NRAS;CCND1;CASP3;PIM1;AKT1;MAPK1;RAC1;JAK2;HRAS;JUN;TGFB1;NOS3;MMP2;PRKCD;STAT3;FN1;PRKCA;MAPK14;SELE;F3;NFKB1;MAPK12;MAPK13;VEGFA;MAPK11;IL6;PIK3CA;CDK4;BCL2;BAX;KRAS
KEGG_2021_Human	MAPK signaling pathway	5.33912e-29	2.63397e-27	0	0	7.32103	476.598	HSPB1;TNF;PPP3CA;PPP3CB;RPS6KA5;PPP3CC;PRKACG;CASP3;RPS6KA1;RAC2;AKT1;RAC3;RAC1;HRAS;PDGFRA;MAP2K1;DUSP3;HGF;RRAS2;PRKCA;TRAF2;CDC25B;PPM1A;PPM1B;MRAS;DDIT3;MAPKAPK2;MAPKAPK5;MAPT;RAF1;TP53;MET;RELA;EGFR;INS;RAP1B;CDC42;MAPK9;NRAS;RAP1A;RRAS;ERBB2;MAPK1;MAP3K2;MAP3K3;ANGPT4;JUN;TGFB1;ANGPT2;ANGPT1;EGF;MAPK14;NFKB1;MAPK12;VEGFA;MAPK13;MAPK11;PPP5C;TAOK3;KRAS;TAB1;PTPN7
KEGG_2021_Human	Human cytomegalovirus infection	2.48796e-28	1.05205e-26	0	0	8.57985	545.343	RB1;GSK3B;CXCL8;TNF;PPP3CA;PPP3CB;PPP3CC;CASP8;CCND1;PRKACG;CASP3;RAC2;AKT1;RAC3;RAC1;HRAS;JAK1;PDGFRA;MAP2K1;PRKCA;TRAF2;RHOA;PIK3CA;RAF1;TP53;ROCK1;ROCK2;SRC;ITPR1;CXCR4;PTGS2;RELA;EGFR;NRAS;MAPK1;IFNB1;STAT3;MAPK14;NFKB1;MAPK12;VEGFA;MAPK13;NFKBIA;MAPK11;IL6;RPS6KB1;RHEB;SP1;CDK4;CTNNB1;CYCS;BAX;KRAS;CALM2
KEGG_2021_Human	C-type lectin receptor signaling pathway	1.21197e-27	4.48428e-26	0	0	15.3787	953.132	SRC;ITPR1;PTGS2;TNF;RELA;PPP3CA;MAPK9;PPP3CB;NRAS;CASP8;PPP3CC;RRAS;CASP1;AKT1;NLRP3;MAPK1;HRAS;IL10;JUN;SYK;PRKCD;RRAS2;PTPN11;MAPK14;NFKB1;RHOA;MAPK12;MAPK13;NFKBIA;CYLD;MAPK11;IL6;MRAS;PIK3CA;MAPKAPK2;KRAS;RAF1;CALM2
KEGG_2021_Human	PD-L1 expression and PD-1 checkpoint pathway in cancer	1.28333e-25	4.22073e-24	0	0	16.4298	941.675	PTEN;HIF1A;RELA;EGFR;PPP3CA;PPP3CB;NRAS;PPP3CC;AKT1;MAPK1;JAK2;HRAS;JAK1;MAP3K3;MAP2K1;JUN;CSNK2A1;EGF;CSNK2A2;STAT3;PTPN11;MAPK14;MAPK12;NFKB1;BATF;MAPK13;NFKBIA;MAPK11;PIK3CA;RPS6KB1;LCK;PTPN6;KRAS;RAF1
KEGG_2021_Human	Cellular senescence	2.08484e-25	6.17112e-24	0	0	10.2103	580.25	RB1;CXCL8;SERPINE1;ITPR1;PTEN;GATA4;FOXO1;RELA;CCNB2;PPP3CA;PPP3CB;NRAS;PPP3CC;CCND1;RRAS;CHEK1;AKT1;MAPK1;E2F5;HRAS;MAP2K1;TGFB1;RRAS2;MAPK14;NFKB1;MAPK12;MAPK13;RBL2;MAPK11;IL6;MRAS;PIK3CA;RHEB;CDK4;MAPKAPK2;CDK2;VDAC1;ATM;KRAS;SLC25A31;RAF1;TP53;CALM2
KEGG_2021_Human	Proteoglycans in cancer	8.58938e-25	2.31132e-23	0	0	8.24225	456.737	ROCK1;ROCK2;SRC;ITPR1;TWIST1;HIF1A;TNF;EGFR;CDC42;NRAS;RRAS;CCND1;PLAU;PRKACG;CASP3;ERBB2;AKT1;MAPK1;RAC1;HRAS;MAP2K1;TGFB1;PDPK1;HGF;MMP2;STAT3;FN1;RRAS2;PRKCA;PTPN11;MAPK14;ESR1;MMP9;RHOA;MAPK12;VEGFA;MAPK13;MAPK11;MRAS;PIK3CA;RPS6KB1;CTNNB1;PTPN6;KRAS;EZR;RAF1;TP53;MET
KEGG_2021_Human	Pancreatic cancer	1.67336e-24	4.12763e-23	0	0	18.2427	998.738	RB1;RALA;RALB;RELA;EGFR;CDC42;MAPK9;CCND1;ERBB2;RAC2;AKT1;RAC3;MAPK1;POLK;RAC1;JAK1;MAP2K1;TGFB1;EGF;STAT3;NFKB1;VEGFA;RAD51;PIK3CA;RPS6KB1;CDK4;BAX;KRAS;RAF1;TP53;BCL2L1
KEGG_2021_Human	Prostate cancer	3.59698e-24	8.19005e-23	0	0	14.3375	773.964	RB1;GSK3B;PTEN;TMPRSS2;PLAT;KLK3;FOXO1;RELA;EGFR;INS;NRAS;CCND1;PLAU;ERBB2;AKT1;MAPK1;HRAS;NKX3-1;PDGFRA;MAP2K1;PDPK1;EGF;MMP9;NFKB1;NFKBIA;AR;PIK3CA;CDK2;BCL2;CTNNB1;KRAS;ERG;RAF1;TP53
KEGG_2021_Human	Sphingolipid signaling pathway	5.32093e-23	1.125e-21	0	0	11.5428	592.003	ROCK1;ROCK2;PTEN;TNF;RELA;PPP2CA;PPP2CB;MAPK9;SGPL1;NRAS;RAC2;AKT1;RAC3;MAPK1;RAC1;CTSD;HRAS;MAP2K1;PDPK1;NOS3;PRKCA;TRAF2;MAPK14;SGPP2;NFKB1;RHOA;MAPK12;SGPP1;MAPK13;MAPK11;PIK3CA;BCL2;BAX;KRAS;RAF1;TP53
KEGG_2021_Human	Hepatitis B	9.96021e-23	1.96548e-21	0	0	9.06251	459.115	RB1;CXCL8;PCNA;SRC;TNF;RELA;MAPK9;NRAS;CASP8;CASP3;AKT1;MAPK1;JAK2;HRAS;JAK1;MAP2K1;JUN;TGFB1;ATP6AP1;SLC10A1;IFNB1;STAT3;PRKCA;MAPK14;MMP9;NFKB1;MAPK12;MAPK13;NFKBIA;MAPK11;IL6;PIK3CA;CDK2;BCL2;CYCS;BIRC5;BAX;KRAS;TAB1;RAF1;TP53
KEGG_2021_Human	FoxO signaling pathway	1.93298e-22	3.57601e-21	0	0	10.4837	524.161	PRKAA2;FOXG1;PTEN;PRKAG1;PRKAG2;SLC2A4;FOXO1;PRKAG3;EGFR;INS;CCNB2;MAPK9;NRAS;CCND1;AKT1;MAPK1;HRAS;IL10;MAP2K1;TGFB1;PDPK1;EGF;PLK1;STAT3;MAPK14;MAPK12;MAPK13;RBL2;MAPK11;IL6;PIK3CA;CDK2;CAT;ATM;KRAS;RAF1;SGK1
KEGG_2021_Human	Neurotrophin signaling pathway	6.08411e-22	1.05935e-20	0	0	11.0726	540.909	YWHAE;GSK3B;RELA;RAP1B;CDC42;MAPK9;NRAS;RPS6KA5;RAP1A;RPS6KA1;AKT1;MAPK1;RAC1;HRAS;MAP3K3;MAP2K1;JUN;PDPK1;PRKCD;PTPN11;MAPK14;NFKB1;RHOA;MAPK12;MAPK13;NFKBIA;MAPK11;PIK3CA;MAPKAPK2;BCL2;BAX;KRAS;RAF1;TP53;CALM2
KEGG_2021_Human	VEGF signaling pathway	8.25632e-22	1.35771e-20	0	0	20.7342	1006.56	SRC;HSPB1;PTGS2;CDC42;PPP3CA;PPP3CB;NRAS;PPP3CC;RAC2;AKT1;RAC3;MAPK1;RAC1;HRAS;MAP2K1;NOS3;PRKCA;MAPK14;MAPK12;MAPK13;VEGFA;MAPK11;PIK3CA;MAPKAPK2;KRAS;RAF1
KEGG_2021_Human	Colorectal cancer	2.07983e-21	3.24015e-20	0	0	14.1588	674.27	GSK3B;RALA;RALB;EGFR;MAPK9;NRAS;CCND1;CASP3;RAC2;AKT1;RAC3;MAPK1;POLK;RAC1;HRAS;MAP2K1;JUN;TGFB1;EGF;RHOA;PIK3CA;RPS6KB1;BCL2;BIRC5;BAX;CYCS;CTNNB1;KRAS;RAF1;TP53
KEGG_2021_Human	Yersinia infection	1.05196e-20	1.5569e-19	0	0	9.47673	435.94	GSK3B;CXCL8;ROCK1;ROCK2;SRC;TNF;RELA;CDC42;MAPK9;RPS6KA1;CASP1;RAC2;AKT1;NLRP3;RAC3;MAPK1;RAC1;IL10;MAP2K1;JUN;IFNB1;FN1;RHOG;TRAF2;MAPK14;NFKB1;RHOA;MAPK12;MAPK13;NFKBIA;MAPK11;IL6;PIK3CA;LCK;TAB1;PKN1
KEGG_2021_Human	T cell receptor signaling pathway	8.97443e-20	1.26497e-18	0	0	11.2291	492.479	GSK3B;CSF2;TNF;RELA;CDC42;PPP3CA;MAPK9;PPP3CB;NRAS;PPP3CC;AKT1;MAPK1;HRAS;IL10;MAP2K1;JUN;PDPK1;MAPK14;NFKB1;RHOA;MAPK12;MAPK13;NFKBIA;MAPK11;PTPRC;PIK3CA;CDK4;LCK;PTPN6;KRAS;RAF1
KEGG_2021_Human	Insulin resistance	3.07956e-19	4.07973e-18	0	0	10.6436	453.675	GSK3B;PRKAA2;PTEN;PRKAG1;PRKAG2;SLC2A4;TNF;ACACB;FOXO1;PTPRF;PRKAG3;RELA;INS;GYS2;GYS1;MAPK9;RPS6KA1;AKT1;PTPN1;PDPK1;NOS3;NR1H2;PRKCD;STAT3;PTPN11;NFKB1;NFKBIA;IL6;PIK3CA;RPS6KB1;PPARA
KEGG_2021_Human	PI3K-Akt signaling pathway	3.17006e-19	4.07973e-18	0	0	4.97128	211.753	YWHAE;GSK3B;PTEN;BRCA1;GYS2;GYS1;CCND1;AKT1;RAC1;JAK2;HRAS;JAK1;PDGFRA;MAP2K1;SYK;PDPK1;HGF;PRKCA;RBL2;PIK3CA;SGK1;RAF1;TP53;MET;PHLPP1;PRKAA2;LAMA1;RELA;EGFR;INS;PPP2CA;PPP2CB;NRAS;RXRA;ERBB2;MAPK1;MCL1;ANGPT4;ANGPT2;ANGPT1;IFNB1;EGF;NOS3;FN1;NFKB1;VEGFA;IL6;RPS6KB1;RHEB;CDK4;CDK2;BCL2;KRAS;PKN1;BCL2L1
KEGG_2021_Human	Influenza A	6.03759e-19	7.44636e-18	0	0	7.54771	316.635	TPSD1;PRSS1;CXCL8;TMPRSS4;TMPRSS2;PLG;TNF;RELA;ICAM1;DNAJB1;CASP8;CASP3;CASP1;AKT1;NLRP3;MAPK1;PRSS3;TPSAB1;JAK2;BCL2L2-PABPN1;JAK1;FDPS;MAP2K1;IFNB1;PRKCA;NFKB1;RAB11A;TMPRSS11D;RAB11B;NFKBIA;IL6;PIK3CA;CDK4;CYCS;BAX;VDAC1;SLC25A31;RAF1
KEGG_2021_Human	Human immunodeficiency virus 1 infection	6.36256e-19	7.53328e-18	0	0	6.6	276.531	ITPR1;CXCR4;TNF;RELA;PPP3CA;CCNB2;MAPK9;PPP3CB;NRAS;PPP3CC;CASP8;CASP3;CHEK1;RAC2;AKT1;RAC3;MAPK1;RAC1;HRAS;JUN;MAP2K1;APOBEC3G;IFNB1;PRKCA;TRAF2;MAPK14;NFKB1;MAPK12;MAPK13;NFKBIA;MAPK11;PIK3CA;RPS6KB1;BCL2;CYCS;BAX;ATM;KRAS;TAB1;RAF1;CALM2;BCL2L1
KEGG_2021_Human	Non-alcoholic fatty liver disease	8.92341e-19	1.0159e-17	0	0	8.03571	333.968	GSK3B;CXCL8;PRKAA2;NDUFB11;PRKAG1;PRKAG2;COX6A1;TNF;COX6A2;PRKAG3;RELA;INS;CDC42;MAPK9;CASP8;RXRA;CASP3;AKT1;RAC1;JUN;TGFB1;ADIPOQ;TRAF2;MAPK14;NFKB1;MAPK12;MAPK13;MAPK11;IL6;PIK3CA;DDIT3;CYCS;BAX;PPARG;CYTB;PPARA
KEGG_2021_Human	Apoptosis	3.01285e-18	3.30298e-17	0	0	8.3439	336.623	BCL2A1;ITPR1;TNF;RELA;MAPK9;NRAS;CASP8;CASP3;LMNA;AKT1;MAPK1;CTSD;HRAS;MCL1;BOK;MAP2K1;JUN;PARP1;PDPK1;GZMB;TRAF2;NFKB1;NFKBIA;PIK3CA;DDIT3;BCL2;CYCS;BIRC5;BAX;ATM;KRAS;RAF1;TP53;BCL2L1
KEGG_2021_Human	Fluid shear stress and atherosclerosis	1.25122e-17	1.32272e-16	0	0	8.24074	320.728	PRKAA2;SRC;KEAP1;PLAT;TNF;RELA;ICAM1;MAPK9;RAC2;AKT1;HMOX1;RAC3;RAC1;GSTM3;NQO1;JUN;NOS3;MMP2;MAPK14;SELE;MMP9;NFKB1;RHOA;MAPK12;MAPK13;VEGFA;MAPK11;PIK3CA;BCL2;CTNNB1;TP53;CALM2;NFE2L2
KEGG_2021_Human	Human T-cell leukemia virus 1 infection	1.4246e-17	1.45408e-16	0	0	6.14211	238.253	RB1;CSF2;PTEN;TNF;RELA;ICAM1;POLB;PPP3CA;CCNB2;MAPK9;PPP3CB;NRAS;PPP3CC;CCND1;PRKACG;CHEK1;AKT1;MAPK1;HRAS;JAK1;MAP3K3;FDPS;JUN;MAP2K1;TGFB1;NFKB1;NFKBIA;KAT2A;IL6;PIK3CA;CDK4;LCK;CANX;CDK2;BAX;VDAC1;ATM;KRAS;SLC25A31;TP53;BCL2L1
KEGG_2021_Human	Retinol metabolism	1.57863e-17	1.55758e-16	0	0	14.307	553.501	UGT2B10;UGT1A10;UGT2B11;UGT1A1;UGT2B15;CYP3A4;DHRS4;SDR16C5;CYP2C9;RDH11;RDH10;ALDH1A1;CYP1A2;UGT1A5;CYP1A1;UGT1A4;UGT1A3;DHRS4L2;RDH13;UGT1A9;UGT1A8;UGT2B7;UGT1A7;UGT1A6
KEGG_2021_Human	Rap1 signaling pathway	1.89065e-17	1.80526e-16	0	0	6.26816	241.368	RALA;RALB;SRC;EGFR;INS;RAP1B;CDC42;NRAS;RAP1A;RRAS;RAC2;AKT1;RAC3;MAPK1;RAC1;HRAS;PDGFRA;ANGPT4;MAP2K1;ANGPT2;ANGPT1;EGF;HGF;PRKCA;MAPK14;RHOA;MAPK12;VEGFA;MAPK13;MAPK11;MRAS;PIK3CA;CTNNB1;KRAS;PRKD1;RAF1;CALM2;MET;SKAP1;RAPGEF4
KEGG_2021_Human	Shigellosis	3.27151e-17	3.02614e-16	0	0	5.65682	214.726	GSK3B;ARF1;CSF2;CXCL8;ROCK1;ROCK2;SRC;ITPR1;ILK;TNF;RELA;EGFR;FOXO1;CDC42;MAPK9;RPS6KA5;CASP1;AKT1;NLRP3;MAPK1;RAC1;JUN;IFNB1;PRKCD;TRAF2;MAPK14;RHOA;NFKB1;MAPK12;MAPK13;NFKBIA;MAPK11;PIK3CA;RPS6KB1;BCL2;CYCS;BAX;VDAC1;ATM;PIK3C3;TAB1;TP53;BCL2L1
KEGG_2021_Human	Salmonella infection	5.20346e-17	4.66735e-16	0	0	5.57356	208.979	NCKAP1;ARF1;RALA;CXCL8;ROCK2;TNF;RELA;CDC42;MAPK9;CASP8;RRAS;CASP3;CASP1;AKT1;NLRP3;MAPK1;RAC1;HRAS;JUN;MAP2K1;RHOG;RHOH;TRAF2;MAPK14;RHOA;NFKB1;MAPK12;RHOB;MAPK13;NFKBIA;MAPK11;IL6;PTPRC;PIK3CA;RHOJ;BCL2;CTNNB1;CYCS;BAX;PIK3C3;PKN1;TAB1;RAF1
KEGG_2021_Human	Hepatitis C	8.35574e-17	7.1102e-16	0	0	7.32061	271.016	RB1;YWHAE;GSK3B;TNF;RELA;EGFR;PPP2CA;PPP2CB;NRAS;CASP8;RXRA;CCND1;CASP3;AKT1;MAPK1;HRAS;JAK1;MAP2K1;EGF;IFNB1;STAT3;TRAF2;NFKB1;NFKBIA;PIK3CA;CDK4;CDK2;CYCS;BAX;CTNNB1;KRAS;RAF1;PPARA;TP53
KEGG_2021_Human	Bladder cancer	8.40733e-17	7.1102e-16	0	0	22.5249	833.754	RB1;MAP2K1;CXCL8;SRC;EGF;MMP2;MMP9;EGFR;VEGFA;NRAS;RPS6KA5;CCND1;CDK4;ERBB2;MAPK1;KRAS;RAF1;HRAS;TP53
KEGG_2021_Human	Steroid hormone biosynthesis	2.06572e-16	1.69848e-15	0	0	14.7597	533.058	UGT2B10;UGT1A10;UGT2B11;UGT1A1;UGT2B15;HSD11B1L;CYP3A4;HSD17B8;CYP19A1;HSD17B1;HSD17B2;CYP1A2;UGT1A5;CYP1A1;CYP1B1;UGT1A4;UGT1A3;UGT1A9;UGT1A8;UGT2B7;UGT1A7;UGT1A6
KEGG_2021_Human	Metabolism of xenobiotics by cytochrome P450	2.97103e-16	2.37682e-15	0	0	12.1009	432.636	UGT2B10;UGT1A10;CBR1;GSTM3;UGT2B11;UGT1A1;UGT2B15;EPHX1;HSD11B1L;CYP3A4;CYP2C9;CYP2D6;CYP1A2;UGT1A5;CYP1A1;CYP1B1;UGT1A4;UGT1A3;UGT1A9;UGT1A8;UGT2B7;UGT1A7;CBR3;UGT1A6
KEGG_2021_Human	Prolactin signaling pathway	4.6092e-16	3.59032e-15	0	0	12.8162	452.583	GSK3B;MAP2K1;SRC;STAT3;MAPK14;ESR1;RELA;MAPK12;NFKB1;ESR2;INS;MAPK13;MAPK9;MAPK11;NRAS;CCND1;PIK3CA;AKT1;MAPK1;KRAS;JAK2;RAF1;HRAS
KEGG_2021_Human	Complement and coagulation cascades	4.73265e-16	3.59196e-15	0	0	10.9348	385.855	CFD;C1S;SERPINE1;CFI;F13A1;PLAT;PLG;C8A;C2;PLAU;C9;F10;F12;F11;F2;F3;F5;F7;F8;F9;PROC;MASP2;MASP1;KLKB1;CFB
KEGG_2021_Human	Pentose and glucuronate interconversions	7.03157e-16	5.20336e-15	0	0	26.0176	907.779	UGT2B10;UGT1A10;UGT2B11;UGT1A1;UGT2B15;AKR1A1;AKR1B1;AKR1B10;UGT1A5;UGT1A4;UGT1A3;UGT1A9;GUSB;UGT1A8;UGT1A7;UGT2B7;UGT1A6
KEGG_2021_Human	TNF signaling pathway	8.74358e-16	6.31244e-15	0	0	8.77289	304.183	CSF2;PTGS2;TNF;CXCL2;RELA;ICAM1;MAPK9;RPS6KA5;CASP8;CASP3;AKT1;MAPK1;MAP2K1;JUN;CCL20;IFNB1;TRAF2;MAPK14;SELE;MMP9;NFKB1;MAPK12;MAPK13;NFKBIA;MAPK11;IL6;PIK3CA;TAB1
KEGG_2021_Human	Non-small cell lung cancer	9.32667e-16	6.57308e-15	0	0	12.2918	425.401	RB1;MAP2K1;PDPK1;EGF;HGF;STAT3;PRKCA;EGFR;NRAS;RXRA;CCND1;PIK3CA;CDK4;ERBB2;AKT1;MAPK1;BAX;KRAS;POLK;RAF1;HRAS;TP53;MET
KEGG_2021_Human	Tuberculosis	1.01668e-15	6.99857e-15	0	0	6.39404	220.737	SRC;CEBPG;TNF;RELA;PPP3CA;MAPK9;PPP3CB;CASP8;PPP3CC;CASP3;AKT1;MAPK1;JAK2;CTSD;JAK1;IL10;TGFB1;ATP6AP1;SYK;NOS2;VDR;IFNB1;MAPK14;NFKB1;RHOA;MAPK12;MAPK13;MAPK11;IL6;BCL2;CYCS;BAX;PIK3C3;RAF1;CALM2
KEGG_2021_Human	Drug metabolism	2.86546e-15	1.91654e-14	0	0	8.76223	293.412	UGT1A10;CYP2C19;CYP3A4;CYP2D6;UGT1A5;UGT1A4;UGT1A3;GUSB;UGT1A9;UGT1A8;UGT1A7;UGT1A6;UGT2B10;GSTM3;UGT2B11;UGT1A1;UGT2B15;FMO1;FMO2;FMO3;FMO4;FMO5;CYP2C9;IMPDH1;IMPDH2;CYP1A2;UGT2B7
KEGG_2021_Human	Fc epsilon RI signaling pathway	2.91366e-15	1.91654e-14	0	0	12.5091	418.67	LYN;MAP2K1;CSF2;SYK;PDPK1;PRKCA;MAPK14;TNF;MAPK12;MAPK13;MAPK9;MAPK11;NRAS;PIK3CA;RAC2;AKT1;RAC3;MAPK1;KRAS;RAC1;RAF1;HRAS
KEGG_2021_Human	Ras signaling pathway	3.83311e-15	2.46652e-14	0	0	5.36915	178.23	RALA;RALB;PLA2G1B;RELA;EGFR;INS;RAP1B;CDC42;MAPK9;NRAS;RAP1A;RRAS;PRKACG;RAC2;AKT1;RAC3;MAPK1;RAC1;HRAS;PDGFRA;ANGPT4;MAP2K1;ANGPT2;ANGPT1;EGF;HGF;RRAS2;PRKCA;PTPN11;RHOA;NFKB1;VEGFA;MRAS;PIK3CA;KRAS;RAF1;CALM2;MET;BCL2L1
KEGG_2021_Human	Autophagy	4.01369e-15	2.52777e-14	0	0	7.39052	244.989	PRKAA2;ITPR1;PTEN;HMGB1;HIF1A;INS;PPP2CA;PPP2CB;MAPK9;NRAS;RRAS;PRKACG;AKT1;MAPK1;SUPT20H;CTSD;HRAS;MAP2K1;PDPK1;PRKCD;RRAS2;MRAS;PIK3CA;RPS6KB1;RHEB;BCL2;PIK3C3;KRAS;RAF1;BCL2L1
KEGG_2021_Human	Endometrial cancer	1.32198e-14	8.15219e-14	0	0	13.7343	438.907	GSK3B;MAP2K1;PDPK1;EGF;PTEN;ILK;EGFR;NRAS;CCND1;PIK3CA;ERBB2;AKT1;MAPK1;BAX;CTNNB1;KRAS;POLK;RAF1;HRAS;TP53
KEGG_2021_Human	Choline metabolism in cancer	1.85132e-14	1.11835e-13	0	0	8.98141	283.995	HIF1A;EGFR;MAPK9;NRAS;RAC2;AKT1;RAC3;MAPK1;RAC1;HRAS;PDGFRA;MAP2K1;JUN;PDPK1;EGF;PRKCA;PIK3CA;RPS6KB1;RHEB;SP1;KRAS;RAF1;PLPP3;PLPP2;PLPP1
KEGG_2021_Human	Osteoclast differentiation	2.76832e-14	1.63885e-13	0	0	7.43784	232.194	TNF;RELA;PPP3CA;MAPK9;PPP3CB;PPP3CC;AKT1;MAPK1;RAC1;JAK1;MAP2K1;JUN;TGFB1;SYK;IFNB1;MITF;TRAF2;MAPK14;NFKB1;MAPK12;MAPK13;NFKBIA;CYLD;MAPK11;PIK3CA;LCK;PPARG;TAB1
KEGG_2021_Human	Insulin signaling pathway	2.95445e-14	1.71474e-13	0	0	7.06791	220.186	GSK3B;PRKAA2;PRKAG1;PRKAG2;SLC2A4;ACACB;FOXO1;PTPRF;PRKAG3;INS;GYS2;GYS1;MAPK9;NRAS;PRKACG;AKT1;MAPK1;HRAS;PTPN1;MAP2K1;PDPK1;PIK3CA;RPS6KB1;RHEB;FASN;KRAS;RAF1;CALM2;RHOQ
KEGG_2021_Human	Focal adhesion	3.37944e-14	1.92368e-13	0	0	5.57902	173.053	GSK3B;ROCK1;ROCK2;SRC;LAMA1;PTEN;ILK;EGFR;RAP1B;CDC42;MAPK9;RAP1A;CCND1;ERBB2;RAC2;AKT1;RAC3;MAPK1;RAC1;HRAS;PDGFRA;JUN;MAP2K1;PDPK1;EGF;HGF;FN1;PRKCA;RHOA;VEGFA;PIK3CA;BCL2;CTNNB1;RAF1;MET
KEGG_2021_Human	Ascorbate and aldarate metabolism	3.66518e-14	2.04697e-13	0	0	25.9501	802.825	UGT2B10;UGT1A10;UGT2B11;UGT1A1;UGT2B15;AKR1A1;UGT1A5;UGT1A4;UGT1A3;UGT1A9;GUSB;UGT1A8;UGT1A7;UGT2B7;UGT1A6
KEGG_2021_Human	Diabetic cardiomyopathy	4.59776e-14	2.47443e-13	0	0	5.51202	169.278	GSK3B;NDUFB11;PTEN;SLC2A4;COX6A1;COX6A2;RELA;INS;GYS2;GYS1;MAPK9;RAC2;AKT1;RAC1;CTSD;TGFB1;PARP1;CMA1;NOS3;MMP2;PRKCD;GSR;PRKCA;MAPK14;MMP9;NFKB1;MAPK12;MAPK13;MAPK11;PIK3CA;SP1;VDAC1;CYTB;SLC25A31;PPARA
KEGG_2021_Human	Viral carcinogenesis	4.59776e-14	2.47443e-13	0	0	5.51202	169.278	RB1;YWHAE;SRC;HDAC1;HPN;RELA;POLB;CDC42;NRAS;CASP8;CCND1;PRKACG;CASP3;CHEK1;MAPK1;RAC1;HRAS;JAK1;LYN;JUN;SYK;STAT3;TRAF2;RHOA;NFKB1;NFKBIA;RBL2;KAT2A;PIK3CA;CDK4;MAPKAPK2;CDK2;BAX;KRAS;TP53
KEGG_2021_Human	Epithelial cell signaling in Helicobacter pylori infection	6.85114e-14	3.62132e-13	0	0	11.1924	339.262	LYN;JUN;CXCL8;ATP6AP1;SRC;PTPN11;MAPK14;CXCL2;RELA;EGFR;MAPK12;NFKB1;MAPK13;CDC42;NFKBIA;MAPK9;MAPK11;CASP3;CSK;RAC1;MET
KEGG_2021_Human	Melanoma	1.27886e-13	6.64111e-13	0	0	10.7524	319.213	RB1;PDGFRA;MAP2K1;EGF;HGF;PTEN;MITF;EGFR;NRAS;CCND1;PIK3CA;CDK4;AKT1;MAPK1;BAX;KRAS;POLK;RAF1;HRAS;TP53;MET
KEGG_2021_Human	B cell receptor signaling pathway	1.69862e-13	8.66883e-13	0	0	9.74622	286.576	LYN;GSK3B;MAP2K1;JUN;SYK;RELA;NFKB1;NFKBIA;PPP3CA;PPP3CB;NRAS;PPP3CC;PIK3CA;RAC2;AKT1;RAC3;MAPK1;PTPN6;KRAS;RAC1;RAF1;HRAS
KEGG_2021_Human	Hepatocellular carcinoma	1.98178e-13	9.78467e-13	0	0	5.96342	174.428	RB1;GSK3B;PTEN;KEAP1;EGFR;NRAS;CCND1;AKT1;HMOX1;MAPK1;POLK;HRAS;GSTM3;NQO1;MAP2K1;TGFB1;CSNK1A1;HGF;TXNRD1;PRKCA;PIK3CA;RPS6KB1;CDK4;BAX;CTNNB1;KRAS;RAF1;TP53;MET;BCL2L1;NFE2L2
KEGG_2021_Human	Bile secretion	1.98338e-13	9.78467e-13	0	0	8.9811	262.687	UGT2B10;UGT1A10;UGT2B11;ABCB1;UGT1A1;SLC10A1;UGT2B15;EPHX1;NR1H4;HMGCR;CYP3A4;SLCO1B1;RXRA;PRKACG;SLCO1B3;UGT1A5;UGT1A4;UGT1A3;UGT1A9;UGT1A8;UGT2B7;UGT1A7;UGT1A6
KEGG_2021_Human	Epstein-Barr virus infection	2.18755e-13	1.0615e-12	0	0	5.34712	155.873	RB1;HDAC1;TNF;RELA;ICAM1;MAPK9;CASP8;CCND1;CASP3;AKT1;RAC1;POLK;JAK1;LYN;JUN;SYK;IFNB1;STAT3;TRAF2;MAPK14;NFKB1;MAPK12;MAPK13;NFKBIA;MAPK11;IL6;PIK3CA;CDK4;CDK2;BCL2;CYCS;BAX;TAB1;TP53
KEGG_2021_Human	Phospholipase D signaling pathway	2.41405e-13	1.15251e-12	0	0	6.41089	186.251	ARF1;RALA;CXCL8;RALB;EGFR;INS;NRAS;RRAS;AKT1;MAPK1;HRAS;PDGFRA;MAP2K1;SYK;EGF;RRAS2;PRKCA;PTPN11;F2;RHOA;MRAS;PIK3CA;RHEB;KRAS;RAF1;PLPP3;PLPP2;PLPP1;RAPGEF4
KEGG_2021_Human	HIF-1 signaling pathway	2.58011e-13	1.21224e-12	0	0	7.80079	226.112	SERPINE1;HIF1A;RELA;EGFR;INS;NPPA;ERBB2;AKT1;HMOX1;MAPK1;ANGPT4;MAP2K1;ANGPT2;ANGPT1;NOS2;EGF;NOS3;STAT3;PRKCA;NFKB1;VEGFA;IL6;PIK3CA;RPS6KB1;BCL2
KEGG_2021_Human	Chemokine signaling pathway	2.69055e-13	1.24438e-12	0	0	5.47861	158.572	GSK3B;CXCL8;ROCK1;ROCK2;SRC;CXCR4;CXCL13;CXCL2;RELA;RAP1B;CDC42;NRAS;RAP1A;PRKACG;RAC2;AKT1;RAC3;MAPK1;RAC1;JAK2;HRAS;LYN;MAP2K1;CCL20;PRKCD;STAT3;NFKB1;RHOA;NFKBIA;FGR;PIK3CA;KRAS;RAF1
KEGG_2021_Human	Relaxin signaling pathway	3.05877e-13	1.39291e-12	0	0	6.95062	200.286	SRC;RELA;EGFR;MAPK9;NRAS;PRKACG;AKT1;MAPK1;HRAS;MAP2K1;JUN;TGFB1;NOS2;NOS3;MMP2;PRKCA;MAPK14;MMP9;NFKB1;MAPK12;MAPK13;VEGFA;NFKBIA;MAPK11;PIK3CA;KRAS;RAF1
KEGG_2021_Human	Small cell lung cancer	3.29487e-13	1.4777e-12	0	0	8.71987	250.62	RB1;NOS2;LAMA1;PTEN;FN1;TRAF2;PTGS2;RELA;NFKB1;NFKBIA;RXRA;CCND1;PIK3CA;CDK4;CASP3;CDK2;BCL2;AKT1;BAX;CYCS;POLK;TP53;BCL2L1
KEGG_2021_Human	Chronic myeloid leukemia	4.17104e-13	1.81195e-12	0	0	9.96831	284.151	RB1;MAP2K1;TGFB1;HDAC1;PTPN11;RELA;NFKB1;NFKBIA;NRAS;CCND1;PIK3CA;CDK4;AKT1;MAPK1;BAX;KRAS;POLK;RAF1;HRAS;TP53;BCL2L1
KEGG_2021_Human	Pertussis	4.17104e-13	1.81195e-12	0	0	9.96831	284.151	IL10;JUN;CXCL8;C1S;NOS2;MAPK14;TNF;RHOA;RELA;MAPK12;NFKB1;C2;MAPK13;MAPK9;MAPK11;IL6;CASP3;CASP1;NLRP3;MAPK1;CALM2
KEGG_2021_Human	GnRH signaling pathway	4.2238e-13	1.81195e-12	0	0	8.59485	244.892	MAP3K2;MAP3K3;MAP2K1;JUN;SRC;MMP2;PRKCD;ITPR1;PRKCA;MAPK14;EGFR;MAPK12;MAPK13;CDC42;MAPK9;MAPK11;NRAS;PRKACG;MAPK1;KRAS;RAF1;HRAS;CALM2
KEGG_2021_Human	Toxoplasmosis	4.98336e-13	2.10725e-12	0	0	7.53062	213.324	LAMA1;TNF;RELA;MAPK9;CASP8;CASP3;AKT1;MAPK1;JAK2;JAK1;IL10;TGFB1;NOS2;PDPK1;STAT3;MAPK14;NFKB1;MAPK12;MAPK13;NFKBIA;MAPK11;BCL2;CYCS;TAB1;BCL2L1
KEGG_2021_Human	IL-17 signaling pathway	5.39578e-13	2.24951e-12	0	0	8.47336	239.355	GSK3B;JUN;CXCL8;CSF2;CCL20;TRAF2;PTGS2;MAPK14;CXCL2;TNF;MMP9;MAPK15;RELA;MAPK12;NFKB1;MAPK13;NFKBIA;MAPK9;MAPK11;IL6;CASP8;CASP3;MAPK1
KEGG_2021_Human	Pathogenic Escherichia coli infection	5.68391e-13	2.33672e-12	0	0	5.31019	149.726	NCKAP1;ARF1;CXCL8;ROCK1;ROCK2;SRC;TNF;RELA;CDC42;MAPK9;CASP8;CASP3;CASP1;NLRP3;MAPK1;RAC1;JUN;TRAF2;PTPN11;F2;MAPK14;RHOA;NFKB1;MAPK12;MAPK13;NFKBIA;MAPK11;IL6;CYCS;BAX;PTPN6;TAB1;EZR
KEGG_2021_Human	Th17 cell differentiation	1.30379e-12	5.28659e-12	0	0	7.56903	207.132	JUN;TGFB1;STAT3;RORC;AHR;GATA3;MAPK14;HIF1A;NFKB1;RELA;MAPK12;MAPK13;NFKBIA;PPP3CA;MAPK9;MAPK11;IL6;PPP3CB;PPP3CC;RXRA;LCK;MAPK1;JAK2;JAK1
KEGG_2021_Human	NOD-like receptor signaling pathway	1.57089e-12	6.28356e-12	0	0	5.44289	147.934	YWHAE;CXCL8;ITPR1;TNF;CXCL2;RELA;MAPK9;CASP8;NAMPT;CASP1;NLRP3;MAPK1;JAK1;JUN;IFNB1;PRKCD;TRAF2;MAPK14;NFKB1;RHOA;MAPK12;MAPK13;NFKBIA;MAPK11;IL6;BCL2;TXNIP;VDAC1;TAB1;PKN1;BCL2L1
KEGG_2021_Human	AMPK signaling pathway	2.58755e-12	1.02122e-11	0	0	6.89358	183.923	PRKAA2;PRKAG1;PRKAG2;SLC2A4;HMGCR;ACACB;FOXO1;PRKAG3;INS;GYS2;PPP2CA;GYS1;PPP2CB;CCND1;AKT1;RAB2A;PDPK1;ADIPOQ;RAB11B;PIK3CA;RPS6KB1;RAB14;RHEB;FASN;PPARG
KEGG_2021_Human	Glioma	3.13626e-12	1.20968e-11	0	0	9.48073	251.126	RB1;PDGFRA;MAP2K1;EGF;PTEN;PRKCA;EGFR;NRAS;CCND1;PIK3CA;CDK4;AKT1;MAPK1;BAX;KRAS;POLK;RAF1;HRAS;TP53;CALM2
KEGG_2021_Human	Thyroid hormone signaling pathway	3.1468e-12	1.20968e-11	0	0	6.82142	180.663	GSK3B;THRB;SRC;HDAC1;GATA4;HIF1A;FOXO1;NRAS;RXRA;CCND1;PRKACG;AKT1;MAPK1;HRAS;MAP2K1;PDPK1;PRKCA;ESR1;KAT2A;PIK3CA;RHEB;CTNNB1;KRAS;RAF1;TP53
KEGG_2021_Human	Chagas disease	3.40797e-12	1.27691e-11	0	0	7.61212	200.997	IL10;JUN;TGFB1;CXCL8;NOS2;IFNB1;SERPINE1;MAPK14;TNF;NFKB1;RELA;MAPK12;MAPK13;NFKBIA;PPP2CA;PPP2CB;MAPK9;MAPK11;IL6;CASP8;PIK3CA;AKT1;MAPK1
KEGG_2021_Human	Longevity regulating pathway	3.40797e-12	1.27691e-11	0	0	7.61212	200.997	PRKAA2;HDAC1;EHMT2;ADIPOQ;PRKAG1;PRKAG2;FOXO1;NFKB1;PRKAG3;RELA;INS;NRAS;PIK3CA;RPS6KB1;RHEB;PRKACG;CAT;AKT1;BAX;PPARG;KRAS;TP53;HRAS
KEGG_2021_Human	Adipocytokine signaling pathway	5.86672e-12	2.14389e-11	0	0	9.8965	255.941	PRKAA2;ADIPOQ;STAT3;PRKAG1;PRKAG2;TRAF2;PTPN11;SLC2A4;TNF;ACACB;PRKAG3;RELA;NFKB1;NFKBIA;MAPK9;RXRA;AKT1;JAK2;PPARA
KEGG_2021_Human	Renal cell carcinoma	5.86672e-12	2.14389e-11	0	0	9.8965	255.941	MAP2K1;JUN;TGFB1;HGF;PTPN11;HIF1A;VEGFA;RAP1B;CDC42;NRAS;RAP1A;PIK3CA;AKT1;MAPK1;KRAS;RAC1;RAF1;HRAS;MET
KEGG_2021_Human	Human papillomavirus infection	6.21358e-12	2.24295e-11	0	0	3.85813	99.5563	RB1;GSK3B;HDAC1;LAMA1;PTEN;PTGS2;TNF;RELA;EGFR;FOXO1;PPP2CA;CDC42;PPP2CB;NRAS;CASP8;CCND1;PRKACG;CASP3;AKT1;MAPK1;HRAS;JAK1;MAP2K1;ATP6AP1;CSNK1A1;IFNB1;EGF;FN1;NFKB1;VEGFA;RBL2;PIK3CA;RPS6KB1;RHEB;CDK4;CDK2;CTNNB1;BAX;ATM;KRAS;RAF1;TP53
KEGG_2021_Human	Breast cancer	8.01317e-12	2.85771e-11	0	0	5.90247	150.808	RB1;GSK3B;PTEN;BRCA1;EGFR;NRAS;CCND1;ERBB2;AKT1;MAPK1;POLK;HRAS;MAP2K1;JUN;EGF;CSNK1A1;ESR1;ESR2;PIK3CA;RPS6KB1;SP1;CDK4;BAX;CTNNB1;KRAS;RAF1;TP53
KEGG_2021_Human	Gastric cancer	1.11433e-11	3.92669e-11	0	0	5.8051	146.406	RB1;GSK3B;ABCB1;EGFR;NRAS;RXRA;CCND1;ERBB2;AKT1;MAPK1;POLK;HRAS;MAP2K1;TGFB1;EGF;CSNK1A1;HGF;PIK3CA;RPS6KB1;CDK2;BCL2;BAX;CTNNB1;KRAS;RAF1;TP53;MET
KEGG_2021_Human	Coronavirus disease	1.23573e-11	4.30326e-11	0	0	4.52981	113.774	CFD;CSF2;CXCL8;C1S;TMPRSS2;F13A1;C8A;TNF;RELA;EGFR;C2;MAPK9;C9;CASP1;NLRP3;MAPK1;JAK1;JUN;SYK;IFNB1;STAT3;PRKCA;F2;MAPK14;NFKB1;MAPK12;MAPK13;NFKBIA;MAPK11;IL6;PIK3CA;MASP2;MASP1;CFB
KEGG_2021_Human	Pathways of neurodegeneration	1.99635e-11	6.87115e-11	0	0	3.21096	79.1088	APP;GSK3B;LRRK2;COX6A1;TNF;COX6A2;PPP3CA;PPP3CB;PPP3CC;CASP8;CASP3;RAC1;HRAS;MAP2K1;GPX2;GPX1;CSNK2A1;CSNK2A2;PRKCA;TRAF2;DDIT3;CAT;PIK3C3;VDAC1;MAPT;RAF1;NDUFB11;ITPR1;PTGS2;HSD17B10;RELA;MAPK9;NRAS;MAPK1;NOS2;CSNK1A1;MAPK14;NFKB1;MAPK12;MAPK13;MAPK11;IL6;BCL2;CTNNB1;CYCS;BAX;KRAS;CYTB;SLC25A31;CALM2;BCL2L1
KEGG_2021_Human	Porphyrin and chlorophyll metabolism	2.26307e-11	7.69965e-11	0	0	13.8924	340.527	UGT2B10;UGT1A10;UGT2B11;UGT1A1;UGT2B15;UGT1A5;HMOX1;UGT1A4;UGT1A3;UGT1A9;GUSB;UGT1A8;UGT1A7;UGT2B7;UGT1A6
KEGG_2021_Human	Oxytocin signaling pathway	2.47741e-11	8.33309e-11	0	0	5.57509	136.151	PRKAA2;ROCK1;ROCK2;SRC;ITPR1;PRKAG1;PRKAG2;PTGS2;PRKAG3;EGFR;PPP3CA;PPP3CB;NRAS;PPP3CC;CCND1;PRKACG;NPPA;MAPK1;HRAS;MAP2K1;JUN;NOS3;PRKCA;RHOA;KRAS;RAF1;CALM2
KEGG_2021_Human	NF-kappa B signaling pathway	3.87367e-11	1.27814e-10	0	0	7.00412	167.918	LYN;CXCL8;CSNK2A1;SYK;PARP1;BCL2A1;CSNK2A2;TRAF2;PTGS2;TNF;CXCL2;NFKB1;RELA;ICAM1;NFKBIA;CYLD;PLAU;LCK;BCL2;ATM;TAB1;BCL2L1
KEGG_2021_Human	Leukocyte transendothelial migration	3.88623e-11	1.27814e-10	0	0	6.60419	158.309	ROCK1;ROCK2;MMP2;RHOH;CXCR4;PRKCA;PTPN11;MAPK14;MMP9;RHOA;MAPK12;ICAM1;MAPK13;RAP1B;CDC42;MAPK11;RAP1A;PIK3CA;RAC2;CTNNB1;RAC1;EZR;RAPGEF4
KEGG_2021_Human	Alzheimer disease	5.81239e-11	1.89062e-10	0	0	3.49975	82.4836	APP;GSK3B;LRP1;NDUFB11;ITPR1;PTGS2;COX6A1;TNF;COX6A2;HSD17B10;RELA;INS;PPP3CA;MAPK9;PPP3CB;NRAS;PPP3CC;CASP8;CASP3;AKT1;MAPK1;NAE1;HRAS;MAP2K1;CSNK2A1;NOS2;CSNK1A1;CSNK2A2;TRAF2;NFKB1;IL6;PIK3CA;DDIT3;CTNNB1;CYCS;VDAC1;PIK3C3;KRAS;MAPT;CYTB;SLC25A31;RAF1;CALM2
KEGG_2021_Human	Natural killer cell mediated cytotoxicity	1.22854e-10	3.95268e-10	0	0	5.86395	133.815	MAP2K1;CSF2;SYK;IFNB1;GZMB;PRKCA;PTPN11;TNF;ICAM1;PPP3CA;PPP3CB;NRAS;PPP3CC;PIK3CA;LCK;CASP3;RAC2;RAC3;MAPK1;PTPN6;KRAS;RAC1;RAF1;HRAS
KEGG_2021_Human	p53 signaling pathway	1.58653e-10	5.04961e-10	0	0	8.50953	192.012	EI24;SERPINE1;PTEN;PPM1D;CCNB2;CASP8;TP53I3;CCND1;CDK4;CASP3;CHEK1;CDK2;BCL2;BAX;CYCS;ATM;TP53;BCL2L1
KEGG_2021_Human	Amoebiasis	1.84344e-10	5.80488e-10	0	0	6.75944	151.507	IL10;ARG2;CSF2;TGFB1;CXCL8;NOS2;LAMA1;FN1;HSPB1;PRKCA;TNF;C8A;CXCL2;NFKB1;RELA;IL6;PIK3CA;PRKACG;C9;CASP3;CTSG
KEGG_2021_Human	Acute myeloid leukemia	3.15286e-10	9.82366e-10	0	0	8.8308	193.196	MAP2K1;CSF2;BCL2A1;STAT3;RELA;NFKB1;NRAS;CCND1;PIK3CA;RPS6KB1;PIM1;AKT1;MAPK1;KRAS;RAF1;HRAS;PPARD
KEGG_2021_Human	Apelin signaling pathway	3.22519e-10	9.84181e-10	0	0	5.55085	121.313	MAP2K1;PRKAA2;NOS2;NOS3;SERPINE1;ITPR1;PRKAG1;PRKAG2;RRAS2;PLAT;PRKAG3;NRAS;MRAS;CCND1;RRAS;RPS6KB1;PRKACG;AKT1;MAPK1;PIK3C3;KRAS;RAF1;CALM2;HRAS
KEGG_2021_Human	Estrogen signaling pathway	3.22519e-10	9.84181e-10	0	0	5.55085	121.313	MAP2K1;JUN;SRC;NOS3;MMP2;PRKCD;ITPR1;ESR1;MMP9;ESR2;EGFR;NRAS;KRT19;PIK3CA;SP1;PRKACG;BCL2;AKT1;MAPK1;KRAS;RAF1;CALM2;CTSD;HRAS
KEGG_2021_Human	Mitophagy	4.05757e-10	1.22384e-09	0	0	8.65719	187.214	JUN;CSNK2A1;SRC;CSNK2A2;RRAS2;MITF;HIF1A;RELA;MAPK9;NRAS;MRAS;RRAS;SP1;KRAS;HRAS;TP53;BCL2L1
KEGG_2021_Human	Leishmaniasis	4.09325e-10	1.22384e-09	0	0	7.93096	171.44	IL10;JUN;TGFB1;NOS2;PTGS2;MAPK14;TNF;RELA;MAPK12;NFKB1;MAPK13;NFKBIA;MAPK11;MAPK1;PTPN6;TAB1;JAK2;JAK1
KEGG_2021_Human	Measles	4.39358e-10	1.3005e-09	0	0	5.45374	117.505	GSK3B;JUN;CSNK2A1;IFNB1;CSNK2A2;STAT3;NFKB1;RELA;NFKBIA;MAPK9;IL6;CASP8;CCND1;PIK3CA;CDK4;CASP3;CDK2;BCL2;AKT1;CYCS;BAX;TP53;BCL2L1;JAK1
KEGG_2021_Human	MicroRNAs in cancer	6.59352e-10	1.92253e-09	0	0	3.57602	75.5963	ABCB1;ROCK1;HDAC1;PTEN;BRCA1;PTGS2;EGFR;NRAS;RPS6KA5;CCND1;PLAU;CASP3;ERBB2;PIM1;CYP1B1;HMOX1;MAPK1;HRAS;MCL1;PDGFRA;ST14;MAP2K1;STAT3;PRKCA;MMP9;RHOA;NFKB1;VEGFA;CDC25B;PIK3CA;BCL2;ATM;KRAS;EZR;RAF1;TP53;MET
KEGG_2021_Human	Central carbon metabolism in cancer	6.62493e-10	1.92253e-09	0	0	8.32964	176.047	PDGFRA;MAP2K1;IDH1;PTEN;HIF1A;EGFR;NRAS;PIK3CA;SCO2;ERBB2;AKT1;MAPK1;KRAS;RAF1;HRAS;TP53;MET
KEGG_2021_Human	Adherens junction	8.40759e-10	2.41616e-09	0	0	8.17496	170.83	PTPN1;CSNK2A1;SRC;CSNK2A2;PTPRF;RHOA;EGFR;CDC42;ERBB2;RAC2;RAC3;MAPK1;CTNNB1;PTPN6;RAC1;ACP1;MET
KEGG_2021_Human	Transcriptional misregulation in cancer	9.03303e-10	2.57094e-09	0	0	4.47467	93.1849	CSF2;CXCL8;KMT2A;HPGD;BCL2A1;HDAC1;TMPRSS2;PLAT;FOXO1;RELA;RXRA;PLAU;POLK;ELANE;GZMB;MITF;MMP9;NFKB1;IL6;SP1;DDIT3;BAX;ATM;PPARG;ERG;TP53;MET;BCL2L1
KEGG_2021_Human	Axon guidance	1.22554e-09	3.45484e-09	0	0	4.56129	93.5972	GSK3B;ROCK1;ROCK2;SRC;ILK;CXCR4;RND1;CDC42;PPP3CA;PPP3CB;NRAS;PPP3CC;RRAS;RAC2;RAC3;MAPK1;RAC1;HRAS;PDPK1;PRKCA;PTPN11;RHOD;RHOA;PIK3CA;KRAS;RAF1;MET
KEGG_2021_Human	Platelet activation	1.37248e-09	3.83258e-09	0	0	5.62489	114.785	LYN;P2RY12;PTGIR;SYK;ROCK1;ROCK2;SRC;NOS3;ITPR1;F2;MAPK14;RHOA;MAPK12;PTGS1;MAPK13;RAP1B;MAPK11;RAP1A;PIK3CA;PRKACG;AKT1;MAPK1
KEGG_2021_Human	Toll-like receptor signaling pathway	1.77661e-09	4.91474e-09	0	0	6.19824	124.886	MAP2K1;JUN;CXCL8;IFNB1;MAPK14;TNF;NFKB1;RELA;MAPK12;MAPK13;NFKBIA;MAPK9;MAPK11;IL6;CASP8;PIK3CA;AKT1;MAPK1;TAB1;RAC1
KEGG_2021_Human	Long-term potentiation	2.7523e-09	7.54335e-09	0	0	8.13694	160.386	MAP2K1;ITPR1;PRKCA;RAP1B;PPP3CA;PPP3CB;NRAS;PPP3CC;RAP1A;PRKACG;RPS6KA1;MAPK1;KRAS;RAF1;HRAS;CALM2
KEGG_2021_Human	Prion disease	4.03843e-09	1.09668e-08	0	0	3.61418	69.8527	GSK3B;NDUFB11;ITPR1;COX6A1;C8A;TNF;COX6A2;PPP3CA;STIP1;MAPK9;PPP3CB;PPP3CC;PRKACG;C9;CASP3;RAC2;MAPK1;RAC1;CSNK2A1;PRKCD;CSNK2A2;MAPK14;MAPK12;MAPK13;MAPK11;IL6;PIK3CA;DDIT3;CYCS;BAX;VDAC1;CYTB;SLC25A31
KEGG_2021_Human	Thyroid cancer	6.05478e-09	1.62929e-08	0	0	12.3994	234.626	NRAS;MAP2K1;RXRA;CCND1;MAPK1;BAX;CTNNB1;PPARG;KRAS;POLK;HRAS;TP53
KEGG_2021_Human	ErbB signaling pathway	1.57971e-08	4.21256e-08	0	0	6.48714	116.531	GSK3B;MAP2K1;JUN;SRC;EGF;PRKCA;EGFR;MAPK9;NRAS;PIK3CA;RPS6KB1;ERBB2;AKT1;MAPK1;KRAS;RAF1;HRAS
KEGG_2021_Human	Oocyte meiosis	1.59601e-08	4.21803e-08	0	0	5.06243	90.8867	YWHAE;MAP2K1;PLK1;ITPR1;MAPK14;MAPK12;INS;MAPK13;PPP2CA;AR;CCNB2;PPP3CA;PPP2CB;MAPK11;PPP3CB;PPP3CC;PRKACG;RPS6KA1;CDK2;MAPK1;CALM2
KEGG_2021_Human	Progesterone-mediated oocyte maturation	3.39721e-08	8.89888e-08	0	0	5.69958	98.0199	MAP2K1;PLK1;MAPK14;MAPK12;CDC25B;INS;MAPK13;CCNB2;MAPK9;MAPK11;PIK3CA;PRKACG;RPS6KA1;CDK2;AKT1;MAPK1;KRAS;RAF1
KEGG_2021_Human	Cell cycle	4.10703e-08	1.06639e-07	0	0	5.00105	85.0577	RB1;YWHAE;GSK3B;TGFB1;PCNA;MCM7;HDAC1;PLK1;CDC25B;RBL2;CCNB2;CDC45;CCND1;CDK4;CHEK1;CDK2;ATM;E2F5;TP53;MCM2
KEGG_2021_Human	RIG-I-like receptor signaling pathway	4.16367e-08	1.07169e-07	0	0	7.06257	120.023	CXCL8;IFNB1;TRAF2;MAPK14;TNF;RELA;MAPK12;NFKB1;MAPK13;NFKBIA;MAPK9;MAPK11;CYLD;CASP8;PIN1
KEGG_2021_Human	Pancreatic secretion	4.67663e-08	1.19335e-07	0	0	5.5633	93.8979	CELA3A;PRSS1;CELA3B;CELA2A;CELA2B;PLA2G1B;CTRB2;CTRB1;ITPR1;PRKCA;RHOA;RAB11A;RAP1B;RAP1A;CTRL;KCNMA1;RAC1;PRSS3
KEGG_2021_Human	JAK-STAT signaling pathway	4.76583e-08	1.20436e-07	0	0	4.31277	72.7099	IL10;PDGFRA;CSF2;EGF;IFNB1;STAT3;PTPN11;EGFR;IL6;CCND1;THPO;PIK3CA;PIM1;BCL2;AKT1;PTPN6;RAF1;JAK2;HRAS;PTPN2;MCL1;BCL2L1;JAK1
KEGG_2021_Human	Terpenoid backbone biosynthesis	4.80115e-08	1.20436e-07	0	0	17.823	300.35	FDPS;IDI1;HMGCS1;IDI2;PMVK;PDSS1;MVD;HMGCR;HMGCS2
KEGG_2021_Human	Th1 and Th2 cell differentiation	5.44436e-08	1.35423e-07	0	0	5.87953	98.3416	JUN;GATA3;MAPK14;RELA;MAPK12;NFKB1;MAPK13;NFKBIA;PPP3CA;MAPK9;MAPK11;PPP3CB;PPP3CC;LCK;MAPK1;JAK2;JAK1
KEGG_2021_Human	Regulation of actin cytoskeleton	6.27567e-08	1.548e-07	0	0	3.69459	61.2711	NCKAP1;ROCK1;ROCK2;SRC;CXCR4;EGFR;INS;CDC42;NRAS;RRAS;RAC2;RAC3;MAPK1;RAC1;HRAS;PDGFRA;MAP2K1;EGF;FN1;RRAS2;F2;RHOA;MRAS;PIK3CA;KRAS;EZR;RAF1
KEGG_2021_Human	mTOR signaling pathway	8.31419e-08	2.03388e-07	0	0	4.33969	70.7488	GSK3B;MAP2K1;PRKAA2;MIOS;PDPK1;NPRL3;PTEN;PRKCA;TNF;RHOA;INS;NRAS;PIK3CA;RPS6KB1;RHEB;RPS6KA1;AKT1;MAPK1;KRAS;RAF1;SGK1;HRAS
KEGG_2021_Human	Growth hormone synthesis, secretion and action	1.05494e-07	2.53909e-07	0	0	4.93536	79.2846	GSK3B;MAP2K1;STAT3;ITPR1;PRKCA;MAPK14;MAPK12;MAPK13;MAPK9;MAPK11;NRAS;PIK3CA;PRKACG;AKT1;MAPK1;KRAS;RAF1;JAK2;HRAS
KEGG_2021_Human	Tight junction	1.05509e-07	2.53909e-07	0	0	4.10449	65.9364	JUN;PCNA;PRKAA2;ROCK1;ROCK2;SRC;PRKAG1;PRKAG2;GATA4;PRKAG3;RHOA;RAP2C;PPP2CA;CDC42;PPP2CB;MAPK9;RAP1A;CCND1;CDK4;PRKACG;ERBB2;RAC1;EZR
KEGG_2021_Human	Fc gamma R-mediated phagocytosis	1.22324e-07	2.92e-07	0	0	5.51062	87.7103	LYN;MAP2K1;SYK;PRKCD;PRKCA;CDC42;PTPRC;PIK3CA;RPS6KB1;RAC2;AKT1;MAPK1;RAC1;RAF1;PLPP3;PLPP2;PLPP1
KEGG_2021_Human	cAMP signaling pathway	1.94662e-07	4.6096e-07	0	0	3.57177	55.1909	ROCK1;ROCK2;RELA;RAP1B;MAPK9;RAP1A;RRAS;PRKACG;NPPA;RAC2;AKT1;RAC3;MAPK1;RAC1;JUN;MAP2K1;RRAS2;RHOA;NFKB1;TSHR;NFKBIA;PIK3CA;PPARA;RAF1;CALM2;RAPGEF4
KEGG_2021_Human	Neutrophil extracellular trap formation	2.10802e-07	4.95218e-07	0	0	3.79116	58.279	MAP2K1;SYK;SRC;HDAC1;PRKCA;AZU1;HMGB1;MAPK14;NFKB1;RELA;MAPK12;MAPK13;MAPK11;PIK3CA;CASP1;RAC2;AKT1;MAPK1;VDAC1;CTSG;RAC1;SLC25A31;RAF1;ELANE
KEGG_2021_Human	Serotonergic synapse	2.35933e-07	5.49891e-07	0	0	4.9163	75.0214	APP;MAP2K1;DDC;ALOX15;ITPR1;PRKCA;CYP2C19;PTGS2;PTGS1;CYP2C9;NRAS;CYP2D6;PRKACG;CASP3;MAPK1;KRAS;RAF1;HRAS
KEGG_2021_Human	Glucagon signaling pathway	5.27918e-07	1.22081e-06	0	0	4.89578	70.7651	PRKAA2;ITPR1;PRKAG1;PRKAG2;ACACB;FOXO1;PRKAG3;GYS2;PPP3CA;GYS1;PPP3CB;PPP4C;PPP3CC;PRKACG;AKT1;PPARA;CALM2
KEGG_2021_Human	Legionellosis	1.1541e-06	2.64816e-06	0	0	6.88136	94.0833	NFKBIA;ARF1;IL6;CXCL8;CASP8;CASP3;CASP1;CYCS;CXCL2;TNF;RELA;NFKB1
KEGG_2021_Human	Cushing syndrome	1.66433e-06	3.78956e-06	0	0	3.84642	51.1808	RB1;GSK3B;MAP2K1;KMT2A;AIP;ITPR1;ASH2L;AHR;EGFR;RAP1B;NR5A1;RAP1A;RASD1;CCND1;SP1;CDK4;PRKACG;CDK2;MAPK1;CTNNB1
KEGG_2021_Human	Wnt signaling pathway	4.85286e-06	1.09653e-05	0	0	3.55457	43.4935	GSK3B;JUN;CSNK2A1;ROCK2;CSNK1A1;CSNK2A2;PRKCA;RHOA;PPP3CA;MAPK9;PPP3CB;PPP3CC;CCND1;PRKACG;RAC2;RAC3;CTNNB1;RAC1;TP53;PPARD
KEGG_2021_Human	Gap junction	5.18494e-06	1.16268e-05	0	0	4.88781	59.4835	MAP3K2;PDGFRA;MAP2K1;SRC;EGF;ITPR1;PRKCA;EGFR;NRAS;PRKACG;MAPK1;KRAS;RAF1;HRAS
KEGG_2021_Human	cGMP-PKG signaling pathway	5.32138e-06	1.18431e-05	0	0	3.53021	42.87	MAP2K1;ROCK1;ROCK2;NOS3;ITPR1;GATA4;RHOA;INS;PPP3CA;PPP3CB;KCNU1;PPP3CC;NPPA;KCNMA1;AKT1;MAPK1;VDAC1;SLC25A31;RAF1;CALM2
KEGG_2021_Human	Signaling pathways regulating pluripotency of stem cells	7.75262e-06	1.71252e-05	0	0	3.73054	43.899	GSK3B;MAP2K1;STAT3;MAPK14;MAPK12;MAPK13;MAPK11;NRAS;PIK3CA;ID4;AKT1;MAPK1;CTNNB1;KRAS;RAF1;JAK2;HRAS;JAK1
KEGG_2021_Human	Thermogenesis	8.37075e-06	1.83536e-05	0	0	3.00063	35.0797	PRKAA2;NDUFB11;PRKAG1;PRKAG2;COX6A1;MAPK14;COX6A2;PRKAG3;MAPK12;MAPK13;MAPK11;NRAS;SLC25A29;RPS6KB1;RHEB;PRKACG;RPS6KA1;NPPA;PPARG;KRAS;CYTB;SLC25A20;HRAS;MGLL
KEGG_2021_Human	Dopaminergic synapse	1.01349e-05	2.20584e-05	0	0	3.82648	44.0026	GSK3B;DDC;ITPR1;PRKCA;MAPK14;MAPK12;MAPK13;PPP2CA;PPP3CA;PPP2CB;MAPK9;MAPK11;PPP3CB;PPP3CC;PRKACG;AKT1;CALM2
KEGG_2021_Human	Long-term depression	1.32129e-05	2.85475e-05	0	0	5.784	64.9793	PPP2CA;LYN;PPP2CB;MAP2K1;NRAS;ITPR1;MAPK1;PRKCA;KRAS;RAF1;HRAS
KEGG_2021_Human	Malaria	1.46273e-05	3.13745e-05	0	0	6.43566	71.6457	IL10;IL6;CXCL8;TGFB1;LRP1;HGF;TNF;MET;SELE;ICAM1
KEGG_2021_Human	Arachidonic acid metabolism	1.55753e-05	3.29306e-05	0	0	5.66803	62.7441	CBR1;CYP2C9;GPX2;GPX1;PLA2G1B;EPHX2;ALOX15;CYP2C19;PTGS2;PTGS1;CBR3
KEGG_2021_Human	Glycerolipid metabolism	1.55753e-05	3.29306e-05	0	0	5.66803	62.7441	PLPP5;PLPP4;AKR1B10;GPAM;AKR1A1;AKR1B1;PLPP3;PLPP2;GLA;MGLL;PLPP1
KEGG_2021_Human	Base excision repair	2.40702e-05	5.05303e-05	0	0	8.22203	87.4375	POLB;FEN1;PCNA;PARP1;APEX1;XRCC1;POLL;HMGB1
KEGG_2021_Human	GnRH secretion	2.49897e-05	5.20912e-05	0	0	5.34636	56.6556	MAP2K1;NRAS;PIK3CA;ITPR1;AKT1;MAPK1;PRKCA;KRAS;RAF1;HRAS;ESR2
KEGG_2021_Human	Necroptosis	3.34604e-05	6.92608e-05	0	0	3.30445	34.0528	PARP1;IFNB1;ALOX15;STAT3;TRAF2;HMGB1;TNF;CYLD;MAPK9;CASP8;BCL2;CASP1;NLRP3;BAX;VDAC1;SLC25A31;JAK2;JAK1
KEGG_2021_Human	Fatty acid biosynthesis	3.5942e-05	7.38808e-05	0	0	12.8213	131.208	MECR;FASN;HSD17B8;ACSF3;ACACB;CBR4
KEGG_2021_Human	Vascular smooth muscle contraction	4.30641e-05	8.79103e-05	0	0	3.53467	35.5334	MAP2K1;PTGIR;ROCK1;ROCK2;PLA2G1B;PRKCD;ITPR1;PRKCA;RHOA;KCNU1;PRKACG;NPPA;KCNMA1;MAPK1;RAF1;CALM2
KEGG_2021_Human	Parathyroid hormone synthesis, secretion and action	4.552e-05	9.2287e-05	0	0	3.92781	39.2677	MAP2K1;VDR;ITPR1;PRKCA;GATA3;PTH1R;RHOA;EGFR;RXRA;SP1;PRKACG;BCL2;MAPK1;RAF1
KEGG_2021_Human	African trypanosomiasis	5.85525e-05	0.000117902	0	0	7.08648	69.0619	IL10;IL6;NPPA;PRKCA;HPR;TNF;SELE;ICAM1
KEGG_2021_Human	Sphingolipid metabolism	7.93906e-05	0.000158781	0	0	5.78434	54.6107	NEU2;ARSA;SGPL1;PLPP3;PLPP2;SGPP2;GLA;PLPP1;SGPP1
KEGG_2021_Human	Inflammatory mediator regulation of TRP channels	8.06254e-05	0.000160169	0	0	3.94374	37.1725	SRC;PRKCD;ITPR1;PRKCA;TRPV1;MAPK14;MAPK12;MAPK13;MAPK9;MAPK11;PIK3CA;PRKACG;CALM2
KEGG_2021_Human	Melanogenesis	0.000110374	0.000217805	0	0	3.8087	34.7035	GSK3B;MAP2K1;MITF;PRKCA;TYR;NRAS;PRKACG;MAPK1;CTNNB1;KRAS;RAF1;CALM2;HRAS
KEGG_2021_Human	Inflammatory bowel disease	0.000152972	0.000299865	0	0	4.67682	41.0871	IL10;JUN;IL6;TGFB1;STAT3;RORC;GATA3;TNF;RELA;NFKB1
KEGG_2021_Human	Fanconi anemia pathway	0.000173636	0.000338134	0	0	5.14029	44.5075	BLM;RAD51;ERCC1;REV1;USP1;POLI;BRCA1;POLK;POLH
KEGG_2021_Human	Rheumatoid arthritis	0.000196196	0.000379569	0	0	3.81581	32.5733	JUN;IL6;CXCL8;CSF2;TGFB1;ATP6AP1;ANGPT1;CCL20;CXCL2;TNF;ICAM1;VEGFA
KEGG_2021_Human	Regulation of lipolysis in adipocytes	0.000200737	0.000385833	0	0	5.02829	42.8084	PIK3CA;PRKACG;NPPA;AKT1;PTGS2;MGLL;TSHR;INS;PTGS1
KEGG_2021_Human	TGF-beta signaling pathway	0.000217312	0.000414996	0	0	3.76908	31.7891	PPP2CA;PPP2CB;TGFB1;ROCK1;RPS6KB1;SP1;NOG;ID4;MAPK1;E2F5;TNF;RHOA
KEGG_2021_Human	Type II diabetes mellitus	0.000293153	0.000556239	0	0	5.40557	43.9733	MAPK9;PIK3CA;ADIPOQ;PRKCD;MAPK1;SLC2A4;TNF;INS
KEGG_2021_Human	Amyotrophic lateral sclerosis	0.000319274	0.000601944	0	0	2.16438	17.4221	NDUFB11;COX6A1;TNF;COX6A2;PPP3CA;PPP3CB;PPP3CC;CASP3;CASP1;RAC1;GPX2;GPX1;NOS2;TRAF2;MAPK14;MAPK12;MAPK13;MAPK11;DDIT3;CAT;BCL2;CYCS;BAX;VDAC1;PIK3C3;CYTB;TP53;BCL2L1
KEGG_2021_Human	Viral myocarditis	0.000394506	0.000739075	0	0	4.53414	35.538	CASP8;CCND1;LAMA1;CASP3;RAC2;RAC3;CYCS;RAC1;ICAM1
KEGG_2021_Human	Aldosterone-regulated sodium reabsorption	0.000409779	0.000762858	0	0	5.98567	46.6876	PIK3CA;PDPK1;MAPK1;PRKCA;KRAS;SGK1;INS
KEGG_2021_Human	Taurine and hypotaurine metabolism	0.000540303	0.000999561	0	0	14.6178	109.975	GAD1;GADL1;GAD2;CSAD
KEGG_2021_Human	Ovarian steroidogenesis	0.000605905	0.00111396	0	0	4.77577	35.3827	PRKACG;HSD17B1;HSD17B2;CYP1A1;CYP1B1;PTGS2;CYP19A1;INS
KEGG_2021_Human	Bacterial invasion of epithelial cells	0.000624231	0.00114057	0	0	3.83678	28.3116	CDC42;PIK3CA;SRC;RHOG;FN1;ILK;CTNNB1;RAC1;MET;RHOA
KEGG_2021_Human	Linoleic acid metabolism	0.000644733	0.0011708	0	0	6.68557	49.1167	CYP2C9;PLA2G1B;ALOX15;CYP1A2;CYP3A4;CYP2C19
KEGG_2021_Human	Endocrine and other factor-regulated calcium reabsorption	0.00078925	0.0014245	0	0	4.56304	32.6003	KLK1;VDR;PRKACG;PRKCA;PTH1R;KLK2;ESR1;RAB11A
KEGG_2021_Human	Calcium signaling pathway	0.000829961	0.0014889	0	0	2.3498	16.6698	PDGFRA;NOS2;EGF;NOS3;HGF;MST1;ITPR1;CXCR4;PRKCA;EGFR;VEGFA;PPP3CA;PPP3CB;PPP3CC;PRKACG;ERBB2;VDAC1;SLC25A31;CALM2;MET
KEGG_2021_Human	Staphylococcus aureus infection	0.000909954	0.00161588	0	0	3.36785	23.5821	IL10;CFD;KRT19;C1S;CFI;MASP2;PLG;MASP1;CFB;ICAM1;C2
KEGG_2021_Human	Tryptophan metabolism	0.000911663	0.00161588	0	0	5.12924	35.9059	DDC;CAT;CYP1A2;CYP1A1;KYAT3;CYP1B1;KYAT1
KEGG_2021_Human	Peroxisome	0.00102817	0.00181154	0	0	3.56941	24.5574	PECR;AMACR;NOS2;IDH1;EPHX2;CAT;AGPS;PMVK;DECR2;DHRS4
KEGG_2021_Human	Amphetamine addiction	0.00111858	0.00195917	0	0	3.85221	26.1784	PPP3CA;PPP3CB;DDC;JUN;PPP3CC;HDAC1;PRKACG;PRKCA;CALM2
KEGG_2021_Human	Cholinergic synapse	0.00117291	0.00203088	0	0	3.05701	20.6295	MAP2K1;NRAS;PIK3CA;PRKACG;ITPR1;BCL2;AKT1;MAPK1;PRKCA;KRAS;JAK2;HRAS
KEGG_2021_Human	Arginine biosynthesis	0.00117324	0.00203088	0	0	7.52996	50.812	ARG2;NOS2;NOS3;GPT2;GPT
KEGG_2021_Human	Adrenergic signaling in cardiomyocytes	0.00168191	0.00289445	0	0	2.65094	16.9338	PRKCA;MAPK14;MAPK12;MAPK13;PPP2CA;PPP2CB;MAPK11;RPS6KA5;PRKACG;BCL2;AKT1;MAPK1;CALM2;RAPGEF4
KEGG_2021_Human	PPAR signaling pathway	0.00184592	0.00315834	0	0	3.55496	22.3777	RXRA;HMGCS1;PDPK1;ADIPOQ;ILK;PPARG;HMGCS2;PPARA;PPARD
KEGG_2021_Human	Hypertrophic cardiomyopathy	0.00209989	0.00357223	0	0	3.21113	19.7994	IL6;PRKAA2;TGFB1;LAMA1;LMNA;PRKAG1;PRKAG2;TNF;EMD;PRKAG3
KEGG_2021_Human	Parkinson disease	0.00303107	0.00512683	0	0	2.13124	12.3587	NDUFB11;LRRK2;ITPR1;COX6A1;COX6A2;MAPK9;PRKACG;DDIT3;CASP3;CYCS;BAX;VDAC1;MAPT;CYTB;SLC25A31;TP53;CALM2;BCL2L1;NFE2L2
KEGG_2021_Human	Selenocompound metabolism	0.00325158	0.00546857	0	0	7.86866	45.0765	SEPSECS;TXNRD1;KYAT3;KYAT1
KEGG_2021_Human	Butanoate metabolism	0.00363093	0.00607207	0	0	5.56389	31.2594	BDH2;HMGCS1;GAD1;GAD2;HMGCS2
KEGG_2021_Human	Renin secretion	0.00439135	0.00730248	0	0	3.36337	18.2568	PPP3CA;PPP3CB;PPP3CC;PRKACG;NPPA;KCNMA1;ITPR1;CALM2
KEGG_2021_Human	Hedgehog signaling pathway	0.00496986	0.00821831	0	0	3.66107	19.4197	GSK3B;HHAT;CCND1;CSNK1A1;PRKACG;CUL3;BCL2
KEGG_2021_Human	Synthesis and degradation of ketone bodies	0.0052894	0.00869812	0	0	10.9488	57.394	BDH2;HMGCS1;HMGCS2
KEGG_2021_Human	Circadian rhythm	0.00571883	0.00930096	0	0	4.92113	25.4127	PRKAA2;RORC;PRKAG1;PRKAG2;PRKAG3
KEGG_2021_Human	Galactose metabolism	0.00571883	0.00930096	0	0	4.92113	25.4127	MGAM;AKR1B10;AKR1B1;GLA;GANC
KEGG_2021_Human	Huntington disease	0.00645217	0.0104363	0	0	1.90065	9.58563	GPX2;GPX1;NDUFB11;HDAC1;ITPR1;TRAF2;COX6A1;COX6A2;MAPK9;CASP8;SP1;CASP3;CYCS;BAX;VDAC1;PPARG;PIK3C3;CYTB;SLC25A31;TP53;TGM2
KEGG_2021_Human	Thyroid hormone synthesis	0.00727797	0.011708	0	0	3.06122	15.0701	GPX2;GPX1;PRKACG;CANX;GSR;ITPR1;PRKCA;TSHR
KEGG_2021_Human	Renin-angiotensin system	0.0101101	0.0161762	0	0	5.38214	24.7267	KLK1;CMA1;CTSG;KLK2
KEGG_2021_Human	Retrograde endocannabinoid signaling	0.010544	0.0167798	0	0	2.26613	10.3159	MAPK9;MAPK11;NDUFB11;PRKACG;ITPR1;MAPK1;PRKCA;PTGS2;MAPK14;MGLL;MAPK12;MAPK13
KEGG_2021_Human	Arginine and proline metabolism	0.0110413	0.0174771	0	0	3.49091	15.7304	ARG2;CKM;NOS2;NOS3;CARNS1;CKB
KEGG_2021_Human	Non-homologous end-joining	0.0115839	0.0182385	0	0	7.66295	34.1625	FEN1;DCLRE1C;POLL
KEGG_2021_Human	Glycerophospholipid metabolism	0.0118561	0.0185682	0	0	2.59307	11.5	PLPP5;PLPP4;GPAM;PLA2G1B;PLPP3;CDIPT;PLPP2;CRLS1;PLPP1
KEGG_2021_Human	Folate biosynthesis	0.0156131	0.0243236	0	0	4.64749	19.3319	DHFR;CBR1;AKR1B10;AKR1B1
KEGG_2021_Human	Protein digestion and absorption	0.016039	0.0248563	0	0	2.4545	10.1438	CELA3A;PRSS1;CELA3B;CELA2A;CELA2B;CTRL;CTRB2;CTRB1;PRSS3
KEGG_2021_Human	Spinocerebellar ataxia	0.0199712	0.0307889	0	0	2.13781	8.36623	MAPK9;PIK3CA;SP1;ITPR1;AKT1;CYCS;PRKCA;VDAC1;TRAF2;PIK3C3;SLC25A31
KEGG_2021_Human	Glutathione metabolism	0.0202252	0.031019	0	0	3.01067	11.7441	GSTM3;GPX2;GPX1;IDH1;GSR;PRDX6
KEGG_2021_Human	Type I diabetes mellitus	0.0223874	0.0341581	0	0	3.36499	12.7844	GAD1;GZMB;GAD2;TNF;INS
KEGG_2021_Human	beta-Alanine metabolism	0.0254287	0.0385995	0	0	3.93167	14.4366	GAD1;CARNS1;GADL1;GAD2
KEGG_2021_Human	Cytosolic DNA-sensing pathway	0.031385	0.0473977	0	0	2.69291	9.32132	NFKBIA;IL6;IFNB1;CASP1;RELA;NFKB1
KEGG_2021_Human	Riboflavin metabolism	0.0343391	0.0515958	0	0	8.50486	28.6739	RFK;ACP1
KEGG_2021_Human	Viral protein interaction with cytokine and cytokine receptor	0.0356493	0.053294	0	0	2.22646	7.42307	IL10;IL6;CXCL8;CCL20;CXCR4;CXCL13;TNF;CXCL2
KEGG_2021_Human	Cocaine addiction	0.0369371	0.0546668	0	0	2.90522	9.58298	DDC;JUN;PRKACG;RELA;NFKB1
KEGG_2021_Human	Ether lipid metabolism	0.0369371	0.0546668	0	0	2.90522	9.58298	PLA2G1B;AGPS;PLPP3;PLPP2;PLPP1
KEGG_2021_Human	Cholesterol metabolism	0.0398144	0.0580544	0	0	2.84051	9.15646	CETP;NPC1;LRP1;VDAC1;LPA
KEGG_2021_Human	N-Glycan biosynthesis	0.0398144	0.0580544	0	0	2.84051	9.15646	GANAB;DOLPP1;ALG2;ALG11;ALG1
KEGG_2021_Human	Vibrio cholerae infection	0.0398144	0.0580544	0	0	2.84051	9.15646	ARF1;ATP6AP1;SEC61G;PRKACG;PRKCA
KEGG_2021_Human	DNA replication	0.0458368	0.0661839	0	0	3.19348	9.84445	FEN1;PCNA;MCM7;MCM2
KEGG_2021_Human	Starch and sucrose metabolism	0.0458368	0.0661839	0	0	3.19348	9.84445	GYS2;GYS1;MGAM;GANC
KEGG_2021_Human	Alanine, aspartate and glutamate metabolism	0.0499155	0.0717232	0	0	3.09655	9.28168	GAD1;GPT2;GAD2;GPT
KEGG_2021_Human	Protein processing in endoplasmic reticulum	0.0603169	0.0862503	0	0	1.76111	4.94544	DNAJB1;MAPK9;MBTPS1;GANAB;DDIT3;SEC61G;CANX;BCL2;BAX;TRAF2;NFE2L2
KEGG_2021_Human	Ubiquinone and other terpenoid-quinone biosynthesis	0.0626019	0.0890873	0	0	5.66902	15.7086	NQO1;TAT
KEGG_2021_Human	Homologous recombination	0.0681423	0.0965078	0	0	2.76121	7.41705	BLM;RAD51;ATM;BRCA1
KEGG_2021_Human	Circadian entrainment	0.0745259	0.104548	0	0	1.98899	5.16464	RPS6KA5;RASD1;PRKACG;ITPR1;MAPK1;PRKCA;CALM2
KEGG_2021_Human	Phosphatidylinositol signaling system	0.0745259	0.104548	0	0	1.98899	5.16464	PIK3CA;ITPR1;PTEN;PRKCA;PIK3C3;CDIPT;CALM2
KEGG_2021_Human	Fat digestion and absorption	0.0783762	0.109431	0	0	2.61934	6.66946	PLA2G1B;PLPP3;PLPP2;PLPP1
KEGG_2021_Human	Basal cell carcinoma	0.0893395	0.124152	0	0	2.20235	5.31936	GSK3B;BAX;CTNNB1;POLK;TP53
KEGG_2021_Human	Insulin secretion	0.106852	0.146688	0	0	1.9164	4.28567	KCNU1;PRKACG;KCNMA1;PRKCA;RAPGEF4;INS
KEGG_2021_Human	Intestinal immune network for IgA production	0.107042	0.146688	0	0	2.32108	5.18653	IL10;IL6;TGFB1;CXCR4
KEGG_2021_Human	Valine, leucine and isoleucine degradation	0.107042	0.146688	0	0	2.32108	5.18653	HMGCS1;HMGCS2;HSD17B10;ACSF3
KEGG_2021_Human	Asthma	0.110853	0.15121	0	0	2.73421	6.01403	IL10;RNASE3;TNF
KEGG_2021_Human	Cysteine and methionine metabolism	0.119662	0.162476	0	0	2.21994	4.71312	MAT2A;TAT;KYAT3;KYAT1
KEGG_2021_Human	Phenylalanine metabolism	0.133646	0.180503	0	0	3.40035	6.84342	DDC;TAT
KEGG_2021_Human	Herpes simplex virus 1 infection	0.134157	0.180503	0	0	1.29833	2.60802	SYK;SRC;IFNB1;TRAF2;PTPN11;TNF;NFKB1;RELA;NFKBIA;IL6;CASP8;PIK3CA;RHEB;CASP3;BCL2;AKT1;CYCS;BAX;TAB1;JAK2;EIF2B1;TP53;JAK1;BCL2L1
KEGG_2021_Human	Systemic lupus erythematosus	0.13963	0.187016	0	0	1.60992	3.16954	IL10;C1S;C9;CTSG;TNF;C8A;ELANE;C2
KEGG_2021_Human	Glutamatergic synapse	0.140784	0.187712	0	0	1.6715	3.27702	PPP3CA;PPP3CB;PPP3CC;PRKACG;ITPR1;MAPK1;PRKCA
KEGG_2021_Human	Nicotinate and nicotinamide metabolism	0.144961	0.192415	0	0	2.39193	4.61951	NT5E;NAMPT;SIRT4
KEGG_2021_Human	Tyrosine metabolism	0.153973	0.203464	0	0	2.31933	4.33942	DDC;TAT;TYR
KEGG_2021_Human	Dilated cardiomyopathy	0.155672	0.204795	0	0	1.70258	3.1668	TGFB1;LAMA1;PRKACG;LMNA;TNF;EMD
KEGG_2021_Human	Gastric acid secretion	0.159942	0.209021	0	0	1.79788	3.29542	PRKACG;ITPR1;PRKCA;EZR;CALM2
KEGG_2021_Human	Endocytosis	0.160297	0.209021	0	0	1.39131	2.54712	ARF3;ARF4;PDGFRA;ARF1;SRC;CXCR4;RHOA;EGFR;RAB11A;RAB11B;CDC42;HRAS;SH3GL1
KEGG_2021_Human	Hippo signaling pathway	0.165143	0.214396	0	0	1.49351	2.68972	YWHAE;PPP2CA;GSK3B;PPP2CB;TGFB1;CCND1;SERPINE1;BIRC5;CTNNB1
KEGG_2021_Human	Aldosterone synthesis and secretion	0.166451	0.21515	0	0	1.66539	2.98614	PRKACG;NPPA;ITPR1;PRKCA;PRKD1;CALM2
KEGG_2021_Human	Alcoholism	0.167759	0.215899	0	0	1.45229	2.59267	MAP2K1;DDC;NRAS;HDAC1;PRKACG;MAPK1;KRAS;RAF1;CALM2;HRAS
KEGG_2021_Human	Allograft rejection	0.172494	0.219712	0	0	2.18657	3.84266	IL10;GZMB;TNF
KEGG_2021_Human	Primary immunodeficiency	0.172494	0.219712	0	0	2.18657	3.84266	DCLRE1C;PTPRC;LCK
KEGG_2021_Human	One carbon pool by folate	0.173691	0.219712	0	0	2.83319	4.95942	DHFR;GART
KEGG_2021_Human	Steroid biosynthesis	0.173691	0.219712	0	0	2.83319	4.95942	CYP51A1;LSS
KEGG_2021_Human	Various types of N-glycan biosynthesis	0.181981	0.229219	0	0	2.12572	3.62191	ALG2;ALG1;ALG11
KEGG_2021_Human	Histidine metabolism	0.201326	0.251476	0	0	2.5496	4.08658	HDC;CARNS1
KEGG_2021_Human	Ferroptosis	0.201351	0.251476	0	0	2.01363	3.22726	ALOX15;HMOX1;TP53
KEGG_2021_Human	Caffeine metabolism	0.20644	0.255675	0	0	5.09642	8.04085	CYP1A2
KEGG_2021_Human	Phenylalanine, tyrosine and tryptophan biosynthesis	0.20644	0.255675	0	0	5.09642	8.04085	TAT
KEGG_2021_Human	Lysosome	0.210834	0.259413	0	0	1.47702	2.29925	ARSA;ATP6AP1;NPC1;CTSG;GUSB;CTSD;GLA
KEGG_2021_Human	Graft-versus-host disease	0.211211	0.259413	0	0	1.9619	3.05055	IL6;GZMB;TNF
KEGG_2021_Human	Cortisol synthesis and secretion	0.2308	0.281661	0	0	1.67274	2.45258	NR5A1;SP1;PRKACG;ITPR1
KEGG_2021_Human	Vasopressin-regulated water reabsorption	0.231228	0.281661	0	0	1.866	2.73248	PRKACG;RAB11A;RAB11B
KEGG_2021_Human	GABAergic synapse	0.246595	0.299149	0	0	1.51861	2.12606	SRC;PRKACG;GAD1;GAD2;PRKCA
KEGG_2021_Human	Carbohydrate digestion and absorption	0.261839	0.316344	0	0	1.7385	2.32964	MGAM;PIK3CA;AKT1
KEGG_2021_Human	Fatty acid elongation	0.271917	0.327184	0	0	2.03915	2.6555	MECR;HACD3
KEGG_2021_Human	Salivary secretion	0.27542	0.330058	0	0	1.44928	1.86878	PRKACG;KCNMA1;ITPR1;PRKCA;CALM2
KEGG_2021_Human	Inositol phosphate metabolism	0.29786	0.35551	0	0	1.47818	1.79028	PIK3CA;PTEN;PIK3C3;CDIPT
KEGG_2021_Human	Citrate cycle (TCA cycle)	0.314336	0.372174	0	0	1.82039	2.10672	ACLY;IDH1
KEGG_2021_Human	Glyoxylate and dicarboxylate metabolism	0.314336	0.372174	0	0	1.82039	2.10672	CAT;PGP
KEGG_2021_Human	Autoimmune thyroid disease	0.324215	0.382341	0	0	1.5294	1.72264	IL10;GZMB;TSHR
KEGG_2021_Human	Arrhythmogenic right ventricular cardiomyopathy	0.332273	0.390289	0	0	1.3969	1.5391	LAMA1;LMNA;CTNNB1;EMD
KEGG_2021_Human	Fructose and mannose metabolism	0.356183	0.41672	0	0	1.64396	1.69708	AKR1B10;AKR1B1
KEGG_2021_Human	Ubiquitin mediated proteolysis	0.436259	0.507811	0	0	1.1409	0.946394	CUL3;KEAP1;BRCA1;SAE1;RHOBTB1;RHOBTB2
KEGG_2021_Human	Thiamine metabolism	0.439093	0.507811	0	0	1.8193	1.49737	ACP1
KEGG_2021_Human	Cytokine-cytokine receptor interaction	0.439188	0.507811	0	0	1.08065	0.889185	IL10;IL6;CSF2;TGFB1;CXCL8;THPO;CCL20;IFNB1;CXCR4;CXCL13;TNF;CXCL2
KEGG_2021_Human	Glycine, serine and threonine metabolism	0.449628	0.517859	0	0	1.34064	1.07162	CHDH;PSPH
KEGG_2021_Human	Primary bile acid biosynthesis	0.480727	0.551532	0	0	1.59172	1.16586	AMACR
KEGG_2021_Human	Cell adhesion molecules	0.489488	0.559415	0	0	1.07617	0.76881	MAG;PTPRC;SDC3;SELE;PTPRF;ICAM1
KEGG_2021_Human	Other glycan degradation	0.500373	0.569655	0	0	1.49801	1.03723	NEU2
KEGG_2021_Human	mRNA surveillance pathway	0.509943	0.577872	0	0	1.08364	0.72978	PPP2CA;PPP2CB;NUDT21;BCL2L2-PABPN1
KEGG_2021_Human	Glycosphingolipid biosynthesis	0.511494	0.577872	0	0	1.18444	0.794072	ST8SIA1;GLA
KEGG_2021_Human	Hematopoietic cell lineage	0.517949	0.582218	0	0	1.07217	0.705358	IL6;CSF2;THPO;TNF
KEGG_2021_Human	Glycosaminoglycan degradation	0.519275	0.582218	0	0	1.41472	0.927093	GUSB
KEGG_2021_Human	Neuroactive ligand-receptor interaction	0.527461	0.589164	0	0	1.00904	0.645466	PRSS1;PTGIR;THRB;GZMA;PLG;PTH1R;TRPV1;F2;NR3C1;TSHR;NMU;CTSG;PRSS3
KEGG_2021_Human	Nucleotide excision repair	0.53493	0.593031	0	0	1.13168	0.708003	PCNA;ERCC1
KEGG_2021_Human	Pyruvate metabolism	0.53493	0.593031	0	0	1.13168	0.708003	AKR1A1;ACACB
KEGG_2021_Human	Pantothenate and CoA biosynthesis	0.554965	0.612947	0	0	1.27311	0.749672	GADL1
KEGG_2021_Human	Oxidative phosphorylation	0.568348	0.625394	0	0	0.994299	0.5618	ATP6AP1;NDUFB11;CYTB;COX6A1;COX6A2
KEGG_2021_Human	Mismatch repair	0.588009	0.639892	0	0	1.15725	0.614518	PCNA
KEGG_2021_Human	Protein export	0.588009	0.639892	0	0	1.15725	0.614518	SEC61G
KEGG_2021_Human	Proximal tubule bicarbonate reclamation	0.588009	0.639892	0	0	1.15725	0.614518	SLC25A10
KEGG_2021_Human	alpha-Linolenic acid metabolism	0.618602	0.670718	0	0	1.06071	0.50945	PLA2G1B
KEGG_2021_Human	Glycosylphosphatidylinositol (GPI)-anchor biosynthesis	0.633037	0.681378	0	0	1.01823	0.46556	PIGA
KEGG_2021_Human	Maturity onset diabetes of the young	0.633037	0.681378	0	0	1.01823	0.46556	INS
KEGG_2021_Human	Cardiac muscle contraction	0.643848	0.690503	0	0	0.908746	0.400115	CYTB;COX6A1;COX6A2
KEGG_2021_Human	Biosynthesis of unsaturated fatty acids	0.646926	0.6913	0	0	0.979012	0.426383	HACD3
KEGG_2021_Human	Notch signaling pathway	0.658836	0.700523	0	0	0.892875	0.372579	KAT2A;HDAC1
KEGG_2021_Human	Phototransduction	0.66029	0.700523	0	0	0.942703	0.391293	CALM2
KEGG_2021_Human	Mineral absorption	0.667868	0.706032	0	0	0.877435	0.354189	VDR;HMOX1
KEGG_2021_Human	Phagosome	0.685295	0.721877	0	0	0.864924	0.32686	ATP6AP1;SEC61G;CANX;PIK3C3;RAC1
KEGG_2021_Human	Lysine degradation	0.693806	0.72825	0	0	0.834152	0.304935	KMT2A;EHMT2
KEGG_2021_Human	Aminoacyl-tRNA biosynthesis	0.718047	0.751032	0	0	0.794927	0.263296	SEPSECS;WARS2
KEGG_2021_Human	Purine metabolism	0.723373	0.753938	0	0	0.813574	0.26346	NT5E;IMPDH1;IMPDH2;GART
KEGG_2021_Human	Propanoate metabolism	0.730509	0.758704	0	0	0.771062	0.242124	ACACB
KEGG_2021_Human	Ribosome biogenesis in eukaryotes	0.780123	0.8074	0	0	0.7262	0.180318	CSNK2A1;CSNK2A2;RIOK1
KEGG_2021_Human	Antigen processing and presentation	0.799357	0.824424	0	0	0.668993	0.149819	CANX;TNF
KEGG_2021_Human	ABC transporters	0.823763	0.846645	0	0	0.577965	0.112052	ABCB1
KEGG_2021_Human	ECM-receptor interaction	0.850494	0.871095	0	0	0.590895	0.0956881	LAMA1;FN1
KEGG_2021_Human	Morphine addiction	0.863345	0.881208	0	0	0.570888	0.0838866	PRKACG;PRKCA
KEGG_2021_Human	Pyrimidine metabolism	0.884774	0.899977	0	0	0.462107	0.0565723	NT5E
KEGG_2021_Human	Glycolysis / Gluconeogenesis	0.924682	0.937349	0	0	0.384869	0.0301372	AKR1A1
KEGG_2021_Human	Synaptic vesicle cycle	0.95078	0.960515	0	0	0.329698	0.0166408	STXBP1
KEGG_2021_Human	Taste transduction	0.963883	0.97044	0	0	0.298543	0.0109821	PRKACG
KEGG_2021_Human	RNA transport	0.97359	0.97689	0	0	0.414974	0.0111069	EIF2S2;EIF2B1;EIF3A
KEGG_2021_Human	Olfactory transduction	0.999995	0.999995	0	0	0.113889	5.25628e-07	PRKACG;CALM2

## Sheet: GO, biological processes
Association Rule Mining and In silico Analysis of Ethiopian Traditional Medicine Prescription Lemessa Etana Bultum1,2,3*, Gwangmin Kim1,2 , Seon-Woo Lee 3, and Doheon Lee1,2* 1Department of Bio and Brain Engineering, Korea Advanced Institute of Science and Technology (KAIST), 291Daehak-ro, Daejeon 34141, South Korea. 2Bio-Synergy Research Center, 291Daehak-ro, 34141 Daejeon, South Korea. 3Institu…
Gene_set	Term	P-value	Adjusted P-value	Old P-value	Old Adjusted P-value	Odds Ratio	Combined Score	Genes
GO_Biological_Process_2021	proteolysis (GO:0006508)	1.65755e-30	6.56722e-27	0	0	7.71916	529.32	PRSS1;PLAT;PRSS22;PHEX;PRSS21;CASP8;PLAU;CASP3;CASP1;CTSG;PRSS3;TPSAB1;CTSD;HABP2;HGFAC;CELA2A;CELA2B;TPSG1;CTRB2;HGF;MMP2;CTRB1;PRSS57;TMPRSS11E;F3;MMP9;PRSS54;TMPRSS11D;F7;F9;PRTN3;CELA3A;TPSD1;CELA3B;TMPRSS7;TMPRSS5;TMPRSS6;HPN;TMPRSS4;PRSS48;KLK4;TMPRSS2;KLK3;NEDD8;PLG;PRSS50;ELANE;MBTPS1;ST14;F12;GZMA;KLK13;KLK14;PRSS38;GZMB;CELA1;AZU1;PRSS33;KLK12;PROC;CTRL;CTRC;KLKB1
GO_Biological_Process_2021	cellular protein modification process (GO:0006464)	4.68797e-22	9.28686e-19	0	0	3.29127	161.641	APP;F13A1;KEAP1;PLAT;TGM1;RPS6KA5;CHEK1;PIM1;AKT1;TGM7;TGM6;TGM5;TGM4;TGM3;TGM2;RAB2A;MAP2K1;CSNK2A1;PRKCD;DYRK1A;PRKCA;ALG1;CDC25B;MAPKAPK2;PRKD1;ERG;PPEF1;PPEF2;CUL3;HIF1A;NAE1;LYN;TGFB1;ST8SIA1;PLK1;FN1;PTPRE;PPP5C;IL6;COPS5;PTPRC;PROC;CDK4;PTPRA;CDK2;ATM;TAB1;CDK13;COPS8;ARF4;GSK3B;LRRK2;PRKAG1;PTEN;PRKAG2;ILK;PRKAG3;PHEX;PTPRF;PPP3CA;PPP3CB;PPP3CC;PP2D1;CTSG;JAK2;JAK1;ILKAP;SYK;PARP1;PDPK1;S…
GO_Biological_Process_2021	dephosphorylation (GO:0016311)	8.40553e-22	1.11009e-18	0	0	9.12758	442.943	PLPPR2;PPM1L;PTEN;PPM1D;PPM1E;PTPRF;PPM1F;PPP2CA;PPP3CA;PPP2CB;PPP3CB;PPP3CC;PP2D1;PSPH;ILKAP;PTPN1;DUSP3;EPHX2;SGPP2;SGPP1;PDP1;PTPRE;PPM1A;PLPP5;PPP5C;PPM1B;PLPP4;PTPRC;PDP2;PTPRA;PGP;PTPN6;TAB1;PTPN7;PPEF1;PLPP3;PPEF2;PLPP2;PLPP1
GO_Biological_Process_2021	estrogen metabolic process (GO:0008210)	2.7774e-20	2.75102e-17	0	0	45.0755	2029.76	UGT2B11;UGT1A1;UGT2B15;HSD17B14;CYP3A4;HSD17B11;HSD17B8;CYP19A1;HSD17B10;CYP2C9;CYP2D6;HSD17B1;HSD17B2;CYP1A2;CYP1A1;CYP1B1;UGT1A3;UGT1A7;UGT2B7
GO_Biological_Process_2021	cortical cytoskeleton organization (GO:0030865)	1.34679e-19	1.06719e-16	0	0	27.4629	1193.3	NCKAP1;ROCK1;ROCK2;RHOBTB3;RHOG;RHOH;RHOF;RND2;TNF;RND3;RHOD;RHOBTB1;RHOA;RHOBTB2;RND1;RHOB;RAC2;RAC3;RAC1;EZR;RHOQ
GO_Biological_Process_2021	Ras protein signal transduction (GO:0007265)	3.48987e-19	2.30448e-16	0	0	8.68206	368.981	RB1;NCKAP1;RALA;RALB;ROCK1;ROCK2;HACD3;RERG;RAP1B;NRAS;RAP1A;RRAS;RAC2;RAC1;HRAS;JUN;RHOG;RHOH;RRAS2;MAPK14;RHOD;RHOA;RHOB;RAP2C;MAPK11;RAP2A;RIT1;RAP2B;MRAS;RIT2;CDK2;MAPKAPK5;KRAS;PRKD1;TP53
GO_Biological_Process_2021	protein phosphorylation (GO:0006468)	6.18723e-18	3.50197e-15	0	0	4.0274	159.582	APP;GSK3B;LRRK2;PRKAG1;PRKAG2;ILK;PRKAG3;PPP3CB;RPS6KA5;CHEK1;RPS6KA1;PIM1;AKT1;CTSG;JAK2;JAK1;PDGFRA;MAP2K1;CSNK2A1;MUSK;SYK;PDPK1;PRKCD;CSNK2A2;DYRK1A;PRKCA;CDC25B;FGR;LCK;MAPKAPK2;BIRC5;MAPKAPK5;PRKD1;ERG;TOP1;SGK1;PRKAA2;ROCK1;ROCK2;SRC;EGFR;MAPK9;ERBB2;MAPK1;CSK;MAP4K5;LYN;MAP3K3;TGFB1;CSNK1A1;PLK1;MAPK14;MAPK15;MAPK12;MAPK13;TAOK3;RPS6KB1;CDK4;CDK2;PTPN6;ATM;PKN1;CDK13;COPS8
GO_Biological_Process_2021	regulation of intracellular signal transduction (GO:1902531)	1.51632e-17	7.50956e-15	0	0	4.22481	163.617	EHMT2;LRRK2;PRKAG1;PTEN;PRKAG2;HSPB1;BRCA1;TNF;PRKAG3;SPRED1;CHEK1;RAC2;AKT1;RAC3;RAC1;SUPT16H;CSNK2A1;PDPK1;CSNK2A2;USP2;RHOG;RHOH;TRAF2;RHOF;RHOD;RHOA;RHOB;RHOJ;MAPKAPK5;RHOU;MAPT;RHOV;EZR;SGK1;TP53;RHOQ;BLM;PHLPP1;PRKAA2;HDAC1;GATA4;EGFR;RELA;CDC42;RASD2;RRAS;MAPK1;LYN;SSRP1;MAPK14;VEGFA;NFKBIA;CYLD;MAPK11;RIT2;TAOK3;CDK2;PIN1;ATM
GO_Biological_Process_2021	cellular response to cytokine stimulus (GO:0071345)	9.79239e-17	4.06395e-14	0	0	3.92421	144.655	GSK3B;CSF2;CXCL8;RORC;F13A1;BRCA1;TNF;CXCL2;ICAM1;CCND1;CASP3;PIM1;CASP1;AKT1;CTSG;JAK2;JAK1;NKX3-1;IL10;SYK;HGF;MMP2;F3;MMP9;RHOA;PIK3CA;LCK;BIRC5;RHOU;PRTN3;TP53;ALOX15;TWIST1;CXCR4;GATA3;PTGS2;HIF1A;FOXO1;RELA;HMOX1;CSK;MCL1;TGFB1;NOS2;CCL20;IFNB1;STAT3;FN1;PTPN11;NFKB1;VEGFA;BATF;MAPK13;MAPK11;IL6;BCL2;PTPN6;PTPN7;PTPN2;BCL2L1;NFE2L2
GO_Biological_Process_2021	protein dephosphorylation (GO:0006470)	1.02573e-16	4.06395e-14	0	0	7.90499	291.03	PPM1L;PTEN;PPM1D;PPM1E;PTPRF;PPM1F;PPP2CA;PPP3CA;PPP2CB;PPP3CB;PPP3CC;PP2D1;ILKAP;PTPN1;DUSP3;PPTC7;PTPN11;PDP1;PTPRE;PPM1A;PPP5C;PPM1B;PTPRC;PDP2;PTPRA;PGP;PTPN6;TAB1;PTPN7;PPEF1;PPEF2;PTPN2
GO_Biological_Process_2021	positive regulation of intracellular signal transduction (GO:1902533)	2.0066e-16	7.22741e-14	0	0	3.66938	132.629	APP;ILK;HMGB1;TNF;CASP8;RAC2;CASP1;RAC1;JAK2;HRAS;NKX3-1;BOK;TGM2;PDGFRA;MIOS;PDPK1;HGF;ADIPOQ;RHOG;TRAF2;F3;RHOA;FGR;F7;PPM1A;PTP4A3;PIK3CA;LCK;DDIT3;PRKD1;MET;TP53;ROCK1;ROCK2;SRC;GATA3;EGFR;RELA;INS;RASD2;THPO;ERBB2;HMOX1;LYN;P2RY12;MAP3K3;TGFB1;F10;ANGPT1;EGF;FN1;PTPN11;ESR1;VEGFA;FKBP1A;PPP5C;IL6;PTPRC;RIT2;RHEB;BCL2;BAX;PTPN6;MYORG;BCL2L1
GO_Biological_Process_2021	steroid metabolic process (GO:0008202)	1.0266e-15	3.38949e-13	0	0	9.21934	318.183	NR1I2;HSD17B14;CYP2C19;CYP3A4;CYP19A1;HSD17B10;CYP2D6;HSD17B1;CYP1B1;UGT1A3;UGT1A8;UGT1A7;UGT2B11;UGT1A1;VDR;UGT2B15;CYP51A1;LSS;DHRS2;DHRS4;CYP2C9;AMACR;NPC1;FDX1;CYP1A2;CYP1A1;UGT2B7
GO_Biological_Process_2021	positive regulation of blood vessel endothelial cell migration (GO:0043536)	3.09108e-15	9.42068e-13	0	0	17.0816	570.701	MAP3K3;ANGPT4;TGFB1;ANGPT1;NOS3;PDPK1;HSPB1;PRKCA;HMGB1;GATA2;PTGS2;MAPK14;HIF1A;VEGFA;SP1;RHOJ;AKT1;HMOX1;PRKD1
GO_Biological_Process_2021	phosphorylation (GO:0016310)	6.53373e-15	1.84905e-12	0	0	4.01071	130.997	APP;GSK3B;LRRK2;PRKAG1;PRKAG2;ILK;PRKAG3;PPP3CB;RPS6KA5;CHEK1;PIM1;AKT1;CTSG;JAK2;JAK1;MAP2K1;CSNK2A1;SYK;PDPK1;PRKCD;DYRK1A;PRKCA;CDC25B;FGR;PIK3CA;LCK;MAPKAPK2;BIRC5;PRKD1;ERG;TOP1;SGK1;PRKAA2;ROCK1;ROCK2;MAPK9;ERBB2;MAPK1;CSK;MAP4K5;LYN;TGFB1;CSNK1A1;PLK1;STAT3;TAOK3;CDK4;CDK2;ATM;PKN1;CDK13;COPS8
GO_Biological_Process_2021	small GTPase mediated signal transduction (GO:0007264)	1.53894e-14	4.06485e-12	0	0	8.53192	271.358	RB1;DIRAS3;RALA;RALB;RRAD;HACD3;RERG;NRAS;RRAS;RAC1;HRAS;JUN;RASL10A;RRAS2;MAPK14;MAPK11;RIT1;MRAS;RIT2;RHEB;CDK2;MAPKAPK5;KRAS;PRKD1;RHEBL1;TP53
GO_Biological_Process_2021	positive regulation of macromolecule metabolic process (GO:0010604)	2.06663e-14	5.0694e-12	0	0	4.00969	126.346	APP;GSK3B;CSF2;CXCL8;PRKAG1;BRCA1;TNF;AKT1;NKX3-1;MAP2K1;MUSK;NOG;MITF;F3;NR5A1;AR;ACTA1;EZR;TP53;ROCK1;ROCK2;HPN;GATA5;TWIST1;GATA2;HIF1A;PPM1F;INS;MAPK9;MAPK1;PTPN1;TGFB1;ANGPT1;VDR;EGF;NOS3;EPHX2;STAT3;FN1;AZU1;MAPK14;SELE;VEGFA;MAPK11;IL6;SP1;ATM;KRAS;MPHOSPH8;NFE2L2
GO_Biological_Process_2021	positive regulation of protein phosphorylation (GO:0001934)	2.17516e-14	5.0694e-12	0	0	4.07275	128.125	APP;LRRK2;PRKAG1;PRKAG2;ILK;TNF;RPS6KA5;CCND1;AKT1;RAC1;JAK2;HRAS;NKX3-1;MUSK;HGF;ADIPOQ;F2;MMP9;RAP2C;TWSG1;RAP2A;MAPRE3;PRKD1;RAF1;TP53;RALB;ROCK2;SRC;GATA1;EGFR;INS;RAP1A;THPO;ERBB2;MAPK1;LYN;ANGPT4;TGFB1;ANGPT1;EGF;PLK1;PTPN11;AZU1;VEGFA;IL6;PTPRC;PIN1;KRAS;CALM2
GO_Biological_Process_2021	cytokine-mediated signaling pathway (GO:0019221)	3.0722e-14	6.76225e-12	0	0	3.22098	100.217	ARF1;CSF2;CXCL8;RORC;F13A1;ILK;CXCL13;TNF;CXCL2;ICAM1;RPS6KA5;CCND1;CASP3;PIM1;CASP1;AKT1;CTSG;JAK2;JAK1;IL10;SYK;HGF;MMP2;PRKCD;AIP;TRAF2;F3;MMP9;PIK3CA;LCK;CANX;BIRC5;RHOU;PRTN3;TP53;RALA;SRC;ALOX15;TWIST1;GATA3;PTGS2;HIF1A;FOXO1;RELA;RAP1B;CDC42;HMOX1;CSK;MCL1;MAP3K3;TGFB1;NOS2;CCL20;IFNB1;STAT3;FN1;PTPN11;NFKB1;VEGFA;BATF;NFKBIA;IL6;BCL2;PTPN6;TAB1;BCL2L1
GO_Biological_Process_2021	xenobiotic glucuronidation (GO:0052697)	5.97236e-14	1.24539e-11	0	0	257.949	7854.3	UGT1A10;UGT2B11;UGT1A1;UGT1A5;UGT1A4;UGT1A3;UGT1A9;UGT1A8;UGT1A7;UGT1A6
GO_Biological_Process_2021	regulation of cytoskeleton organization (GO:0051493)	6.31735e-14	1.25147e-11	0	0	7.93418	241.143	GSK3B;PRKAA2;ROCK1;LRP1;ROCK2;RHOBTB3;RND2;RND3;RHOBTB1;RHOBTB2;RND1;RAC2;RAC3;MAPK1;RAC1;PRKCD;RHOG;RHOH;RHOF;RHOD;RHOA;RHOB;CYLD;MAPT;EZR;RHOQ
GO_Biological_Process_2021	positive regulation of endothelial cell migration (GO:0010595)	6.86383e-14	1.29498e-11	0	0	9.55333	289.561	ANGPT4;TGFB1;ANGPT1;PDPK1;ROCK2;EGF;NOS3;HSPB1;PRKCA;HMGB1;GATA3;GATA2;MAPK14;HIF1A;RHOB;VEGFA;RRAS;SP1;AKT1;RAC1;PRKD1;PLPP3;MET
GO_Biological_Process_2021	positive regulation of gene expression (GO:0010628)	7.54187e-14	1.35822e-11	0	0	3.5339	106.779	APP;GSK3B;CSF2;CXCL8;PRKAG1;BRCA1;TNF;AKT1;NKX3-1;IL10;MAP2K1;MUSK;NOG;DYRK1A;MITF;F3;NR5A1;FGR;AR;ACTA1;KAT2A;EZR;TP53;ROCK1;ROCK2;HPN;GATA5;TWIST1;GATA2;HIF1A;EGFR;PPM1F;INS;MAPK9;ERBB2;MAPK1;TGFB1;ANGPT1;VDR;EGF;NOS3;EPHX2;STAT3;FN1;AZU1;MAPK14;LARP6;VEGFA;BATF;MAPK11;IL6;RPS6KB1;SP1;ATM;KRAS;NFE2L2
GO_Biological_Process_2021	negative regulation of apoptotic process (GO:0043066)	9.80124e-14	1.68837e-11	0	0	3.50862	105.096	RB1;YWHAE;ARF4;GSK3B;HSPB1;TNF;CASP3;RPS6KA1;PIM1;AKT1;CTSG;IL10;GPX1;CSNK2A1;HGF;PRKCD;CSNK2A2;PRKCA;MMP9;MAG;PIK3CA;CAT;BIRC5;VDAC1;RAF1;TP53;PRKAA2;BCL2A1;SRC;HDAC1;HPN;GATA6;GATA4;GATA1;EGFR;FOXO1;RELA;MAPK1;MCL1;ANGPT4;ANGPT1;PLK1;NR1H4;BFAR;AZU1;DHRS2;NFKB1;VEGFA;NFKBIA;IL6;COPS5;PROC;RPS6KB1;BCL2;CTNNB1;BCL2L1
GO_Biological_Process_2021	cellular response to oxidative stress (GO:0034599)	1.36249e-13	2.24924e-11	0	0	7.23583	214.356	PRKAA2;LRRK2;KEAP1;HIF1A;FOXO1;EGFR;MAPK9;AKT1;HMOX1;MAPK1;PDGFRA;JUN;GPX2;GPX1;PARP1;TXNRD1;PRKCD;GSR;PRDX6;MMP9;DHRS2;CAT;CYCS;PRKD1;MAPT;TP53;NFE2L2
GO_Biological_Process_2021	flavonoid glucuronidation (GO:0052696)	1.50407e-13	2.38365e-11	0	0	173196	5.11369e+06	UGT1A10;UGT1A1;UGT1A5;UGT1A4;UGT1A3;UGT1A9;UGT1A8;UGT1A7;UGT1A6
GO_Biological_Process_2021	regulation of actin filament-based process (GO:0032970)	1.7324e-13	2.63992e-11	0	0	10.5451	309.857	ROCK1;LRP1;ROCK2;PRKCD;RHOG;RHOBTB3;RHOH;RHOF;RND2;RND3;RHOD;RHOA;RHOBTB1;RND1;RHOB;RHOBTB2;RAC2;RAC3;RAC1;EZR;RHOQ
GO_Biological_Process_2021	regulation of actin cytoskeleton organization (GO:0032956)	2.56105e-13	3.75811e-11	0	0	8.84857	256.548	PDGFRA;ROCK1;LRP1;ROCK2;PRKCD;RHOG;RHOBTB3;RHOH;RHOF;RND2;RND3;RHOD;RHOA;RHOBTB1;RND1;RHOB;RHOBTB2;PIK3CA;RAC2;RAC3;RAC1;EZR;RHOQ
GO_Biological_Process_2021	cellular glucuronidation (GO:0052695)	3.08421e-13	4.36416e-11	0	0	44.3249	1276.88	UGT1A10;UGT2B11;UGT1A1;UGT2B15;UGT1A5;UGT1A4;UGT1A3;UGT1A9;UGT1A8;UGT2B7;UGT1A7;UGT1A6
GO_Biological_Process_2021	positive regulation of cellular process (GO:0048522)	4.2273e-13	5.77537e-11	0	0	3.08005	87.7569	CSF2;HP;PTEN;ASH2L;TNF;TGM1;PPP3CA;CCND1;NAMPT;CHEK1;RPS6KA1;AKT1;RAC1;HRAS;NKX3-1;TGM2;PDGFRA;CSNK2A1;PRKCD;RHOG;PRKCA;RHOD;CDC25B;AR;ACLY;BIRC5;PRTN3;MVD;MAPT;PRKAA2;LRP1;HDAC1;PLA2G1B;CUL3;HPN;HPR;GATA2;ACACB;EGFR;RELA;INS;CDC42;RAB25;THPO;LMNA;ERBB2;LYN;TGFB1;EGF;FN1;AZU1;MAPK15;TSHR;VEGFA;IL6;CDK4;FASN;CDK2;FKBP1B;BCL2;PTPN6;ATM;KRAS;CDK13
GO_Biological_Process_2021	regulation of protein kinase B signaling (GO:0051896)	4.5285e-13	5.98064e-11	0	0	5.19122	147.551	PHLPP1;SRC;PTEN;GATA4;GATA3;TNF;EGFR;INS;RASD2;RRAS;THPO;ERBB2;RAC2;AKT1;RAC1;P2RY12;PDGFRA;TGFB1;F10;ANGPT1;PDPK1;EGF;HGF;RHOG;PTPN11;F3;ESR1;F7;PIK3CA;LCK;DDIT3;PPARA;MET;MYORG
GO_Biological_Process_2021	regulation of blood vessel endothelial cell migration (GO:0043535)	7.87637e-13	1.00665e-10	0	0	12.6612	352.864	ANGPT4;TGFB1;ANGPT2;ANGPT1;PDPK1;NOS3;HSPB1;PRKCA;HMGB1;GATA2;MAPK14;TNF;HIF1A;VEGFA;SP1;AKT1;PPARG;PRKD1
GO_Biological_Process_2021	positive regulation of cellular metabolic process (GO:0031325)	8.40358e-13	1.04047e-10	0	0	7.75673	215.675	CBR1;TGFB1;CXCL8;ANGPT1;EGF;NR1H2;ADIPOQ;HPN;GATA3;F2;MAPK14;ACACB;SELE;INS;VEGFA;DHRS4;NFKBIA;ACLY;FASN;AKT1;PPARG;PPARA;TP53;PPARD
GO_Biological_Process_2021	peptidyl-serine phosphorylation (GO:0018105)	9.80193e-13	1.17683e-10	0	0	6.00454	166.032	GSK3B;ROCK1;ROCK2;LRRK2;MAPK9;RPS6KA5;RPS6KA1;AKT1;MAPK1;CSNK2A1;PDPK1;CSNK1A1;PRKCD;CSNK2A2;PLK1;DYRK1A;PRKCA;MAPK14;MAPK12;MAPK13;RPS6KB1;MAPKAPK2;CDK2;MAPKAPK5;ATM;PRKD1;TOP1;PKN1;SGK1
GO_Biological_Process_2021	peptidyl-serine modification (GO:0018209)	1.38529e-12	1.61428e-10	0	0	5.67959	155.082	GSK3B;ROCK1;ROCK2;LRRK2;MAPK9;RPS6KA5;RPS6KA1;AKT1;MAPK1;CSNK2A1;PARP1;PDPK1;CSNK1A1;PRKCD;CSNK2A2;PLK1;DYRK1A;PRKCA;MAPK14;MAPK12;MAPK13;RPS6KB1;MAPKAPK2;CDK2;MAPKAPK5;ATM;PRKD1;TOP1;PKN1;SGK1
GO_Biological_Process_2021	zymogen activation (GO:0031638)	3.4461e-12	3.90098e-10	0	0	14.3262	378.122	KLK1;F12;F11;HP;PLAT;KLK3;KLK2;HPR;PRSS12;CASP8;F9;PLAU;C1RL;PRSS3;KLKB1;HGFAC
GO_Biological_Process_2021	negative regulation of blood coagulation (GO:0030195)	6.67806e-12	7.34957e-10	0	0	15.5619	400.443	PDGFRA;F10;NOS3;F12;SERPINE1;F11;PLAT;PLG;F2;F3;F7;F8;PROC;PLAU;KLKB1
GO_Biological_Process_2021	transmembrane receptor protein tyrosine kinase signaling pathway (GO:0007169)	7.7401e-12	8.28818e-10	0	0	3.50709	89.7274	NCKAP1;GRB7;GSK3B;ROCK1;ROCK2;SRC;HPN;PLAT;EGFR;FOXO1;INS;CDC42;SPRED1;CASP3;NAMPT;ERBB2;AKT1;MAPK1;RAC1;JAK2;HRAS;LYN;PDGFRA;ANGPT2;ANGPT1;MUSK;SYK;ATP6AP1;HGF;MMP2;STAT3;MST1;PTPN11;MAPK14;MMP9;RHOA;VEGFA;FGR;MAPK11;PIK3CA;RAB14;LCK;MAPKAPK2;PRKD1;MET;PTPN2;RHOQ
GO_Biological_Process_2021	cellular response to oxygen-containing compound (GO:1901701)	1.10026e-11	1.14717e-09	0	0	3.85579	97.2926	CXCL8;ROCK2;SERPINE1;RORC;AHR;HMGB1;CXCL13;CXCL2;RELA;EGFR;FOXO1;RAP1B;MAPK9;RAP1A;CASP1;AKT1;NLRP3;MAPK1;CTSG;TGM2;LYN;IL10;P2RY12;PDGFRA;JUN;PRKCD;NR1H4;GPBAR1;TRPV1;MAPK14;ESR1;MMP9;RHOA;NFKB1;TSHR;IL6;CDK2;ATM;PRKD1;MAPT;EZR
GO_Biological_Process_2021	negative regulation of intracellular signal transduction (GO:1902532)	1.76891e-11	1.79703e-09	0	0	4.88447	120.93	PHLPP1;PRKAA2;SRC;PPM1N;NPRL3;ITPR1;PTEN;TWIST1;RELA;SPRED1;CASP8;AKT1;NLRP3;MCL1;LYN;DUSP3;ADIPOQ;NR1H4;RHOH;MAPK14;ESR1;MMP9;CYLD;PPM1A;PPM1B;DDIT3;BCL2;MAPKAPK5;PPARA;PPEF2;BCL2L1
GO_Biological_Process_2021	regulation of angiogenesis (GO:0045765)	3.41708e-11	3.382e-09	0	0	4.74123	114.262	CXCL8;ROCK1;ROCK2;SERPINE1;GATA6;TWIST1;HSPB1;GATA4;KLK3;BRCA1;GATA2;CXCL13;HIF1A;SPRED1;RRAS;ERBB2;CYP1B1;HMOX1;ANGPT4;PDPK1;NOS3;PRKCA;F3;RHOB;VEGFA;IL6;SP1;RHOJ;CTNNB1;PPARG;PRKD1
GO_Biological_Process_2021	positive regulation of cytokine production (GO:0001819)	3.52709e-11	3.382e-09	0	0	3.69607	88.9568	APP;CSF2;ROCK2;PLA2G1B;SERPINE1;CEBPG;TWIST1;GATA4;GATA3;BRCA1;HMGB1;PTGS2;HIF1A;TNF;RELA;INS;CYP1B1;HMOX1;NLRP3;ELANE;IL10;TGFB1;SYK;NOS2;STAT3;ADIPOQ;NR1H4;TRAF2;PTPN11;MAPK14;F3;NFKB1;BATF;MAPK13;FGR;MAPK11;KAT2A;IL6;PTPRC;DDIT3;CTNNB1
GO_Biological_Process_2021	regulation of apoptotic process (GO:0042981)	3.58516e-11	3.382e-09	0	0	2.6751	64.3406	TOP2A;ARF4;GSK3B;HSPB1;HMGB1;TNF;CASP8;CASP3;RPS6KA1;PIM1;CASP1;AKT1;CYP1B1;JAK2;CTSD;BOK;TGM2;IL10;HGF;TRAF2;MMP9;RHOB;KCNMA1;CAT;BIRC5;VDAC1;SGK1;RAF1;TP53;PHLPP1;PRKAA2;BCL2A1;SRC;HDAC1;HPN;GATA6;GATA1;EGFR;FOXO1;RELA;NAE1;BCL2L14;MCL1;ANGPT4;JUN;ANGPT1;GZMA;PLK1;NR1H4;BFAR;AZU1;DHRS2;NFKB1;VEGFA;NFKBIA;IL6;COPS5;TP53I3;PROC;RPS6KB1;APEX1;BCL2;CTNNB1;BAX;PTPN6;ATM;BCL2L1
GO_Biological_Process_2021	negative regulation of programmed cell death (GO:0043069)	4.66625e-11	4.29946e-09	0	0	3.46709	82.4755	ARF4;GSK3B;PRKAA2;BCL2A1;SRC;HDAC1;HPN;GATA6;HSPB1;GATA1;RELA;EGFR;FOXO1;CASP3;RPS6KA1;PIM1;AKT1;MCL1;IL10;ANGPT4;ANGPT1;HGF;PLK1;NR1H4;BFAR;AZU1;DHRS2;MMP9;NFKB1;VEGFA;NFKBIA;IL6;COPS5;PROC;RPS6KB1;CAT;BCL2;CTNNB1;BIRC5;VDAC1;RAF1;TP53;MET;BCL2L1
GO_Biological_Process_2021	positive regulation of transcription, DNA-templated (GO:0045893)	6.64389e-11	5.98252e-09	0	0	2.27469	53.3067	ARF4;APP;THRB;SERPINE1;RASL11A;RORC;ILK;AHR;BRCA1;HMGB1;NR3C1;TNF;PPP3CA;PPP3CB;RPS6KA5;NAMPT;CHEK1;RPS6KA1;AKT1;HRAS;NKX3-1;KCNH2;IL10;SUPT16H;MAP2K1;PARP1;HGF;DYRK1A;RHOG;MITF;NR5A1;AR;PPM1A;KAT2A;DDIT3;PPARG;MAPRE3;PRKD1;ERG;PPARA;MET;TP53;SKAP1;RHOQ;PPARD;BLM;KMT2A;HDAC1;TMPRSS6;PLA2G1B;NR1I2;CEBPG;GATA6;GATA5;TWIST1;GATA4;GATA3;GATA2;HIF1A;GATA1;EGFR;FOXO1;RELA;RXRA;ERBB2;NLRP3;E2F5;MAP3K2;N…
GO_Biological_Process_2021	positive regulation of protein kinase B signaling (GO:0051897)	7.16139e-11	6.30521e-09	0	0	5.28192	123.384	SRC;GATA3;TNF;EGFR;INS;RASD2;THPO;ERBB2;RAC2;RAC1;P2RY12;PDGFRA;TGFB1;F10;ANGPT1;PDPK1;EGF;HGF;RHOG;PTPN11;ESR1;F3;F7;PIK3CA;LCK;MET;MYORG
GO_Biological_Process_2021	cellular response to organic cyclic compound (GO:0071407)	7.54773e-11	6.50089e-09	0	0	5.49183	127.999	BLM;ROCK2;LRRK2;RORC;AHR;BRCA1;NR3C1;TNF;EGFR;RAP1B;RAP1A;CASP3;CYP1B1;TGM2;NKX3-1;P2RY12;TGFB1;NR1H4;GPBAR1;TRPV1;ESR1;AR;RAD51;CYP1A1;CTNNB1;EZR
GO_Biological_Process_2021	positive regulation of nucleic acid-templated transcription (GO:1903508)	9.2049e-11	7.75953e-09	0	0	3.02294	69.8562	RORC;ILK;AHR;BRCA1;TNF;PPP3CB;RPS6KA1;AKT1;NKX3-1;KCNH2;IL10;MAP2K1;DYRK1A;RHOG;MITF;AR;PPM1A;KAT2A;DDIT3;PPARG;MAPRE3;PPARA;TP53;SKAP1;PPARD;BLM;KMT2A;HDAC1;NR1I2;GATA6;GATA4;GATA3;HIF1A;GATA1;EGFR;FOXO1;RELA;RXRA;MAP3K2;NFE2;JUN;TGFB1;EGF;NR1H2;STAT3;NR1H4;ESR1;NFKB1;ESR2;IL6;SP1;CTNNB1
GO_Biological_Process_2021	negative regulation of extrinsic apoptotic signaling pathway (GO:2001237)	9.9429e-11	8.16641e-09	0	0	8.10724	186.722	GSK3B;CSF2;GPX1;SRC;NOS3;SERPINE1;TRAF2;BRCA1;TNF;GATA1;RELA;ICAM1;AR;CASP8;BCL2;AKT1;HMOX1;MCL1;BCL2L1
GO_Biological_Process_2021	cell projection assembly (GO:0030031)	1.00998e-10	8.16641e-09	0	0	25.8161	594.181	CDC42;NCKAP1;RHOJ;RHOG;RAC2;RHOH;RAC3;RHOU;RHOV;RAC1;RHOQ
GO_Biological_Process_2021	regulation of ERK1 and ERK2 cascade (GO:0070372)	1.12058e-10	8.87944e-09	0	0	4.23902	97.1246	APP;ALOX15;PTEN;GATA4;HMGB1;TNF;EGFR;ICAM1;SPRED1;RAP1A;RRAS;THPO;ERBB2;HRAS;LYN;PDGFRA;PTPN1;MAP2K1;DUSP3;TGFB1;SYK;ATP6AP1;ANGPT1;CCL20;ADIPOQ;FN1;PRKCA;PTPN11;PTPRC;PIN1;PTPN6;EZR;PTPN2
GO_Biological_Process_2021	positive regulation of transcription by RNA polymerase II (GO:0045944)	1.53608e-10	1.19332e-08	0	0	2.43415	55.0035	ARF4;APP;THRB;SERPINE1;AHR;BRCA1;HMGB1;NR3C1;TNF;PPP3CA;PPP3CB;RPS6KA5;NAMPT;RPS6KA1;HRAS;NKX3-1;IL10;SUPT16H;PARP1;HGF;MITF;NR5A1;AR;KAT2A;DDIT3;PPARG;PRKD1;ERG;PPARA;MET;TP53;SKAP1;RHOQ;PPARD;KMT2A;HDAC1;TMPRSS6;PLA2G1B;NR1I2;CEBPG;GATA6;GATA5;TWIST1;GATA4;GATA3;GATA2;HIF1A;GATA1;EGFR;FOXO1;RELA;RXRA;NLRP3;E2F5;JUN;TGFB1;IFNB1;VDR;NR1H2;STAT3;NR1H4;ESR1;NFKB1;VEGFA;NFKBIA;IL6;COPS5;SP1;ZGLP1;AP…
GO_Biological_Process_2021	retinoid metabolic process (GO:0001523)	1.77979e-10	1.35606e-08	0	0	7.23581	162.439	DHRS13;UGT1A1;LRP1;SDC3;AKR1B1;CYP3A4;SDR16C5;AKR1B10;CYP2D6;RDH11;RDH10;ALDH1A1;CYP1A2;CYP1A1;CYP1B1;UGT1A3;RDH13;UGT1A9;UGT1A8;UGT1A7
GO_Biological_Process_2021	positive regulation of vasculature development (GO:1904018)	1.84344e-10	1.37806e-08	0	0	6.75944	151.507	ANGPT4;CXCL8;PDPK1;NOS3;SERPINE1;GATA6;TWIST1;HSPB1;PRKCA;GATA4;BRCA1;GATA2;HIF1A;F3;RHOB;VEGFA;RRAS;SP1;CYP1B1;HMOX1;PRKD1
GO_Biological_Process_2021	apoptotic process (GO:0006915)	2.2005e-10	1.61452e-08	0	0	4.22999	94.063	APP;NCKAP1;CXCR4;AHR;FOXO1;PPP2CA;CASP8;RFK;CASP3;CHEK1;CASP1;AKT1;NLRP3;NAE1;JAK2;BCL2L14;BOK;PARP1;GZMA;PRKCD;GZMB;RHOB;GZMH;NFKBIA;PIK3CA;BCL2;BAX;VDAC1;RAF1;PPARD;BCL2L1;MCM2
GO_Biological_Process_2021	extracellular matrix disassembly (GO:0022617)	2.4377e-10	1.75603e-08	0	0	9.01149	199.467	PRSS1;TMPRSS6;CMA1;MMP2;CTRB2;CTRB1;HPN;KLK5;KLK4;PLG;KLK2;MMP9;KLK7;CTSG;TPSAB1;KLKB1;ELANE
GO_Biological_Process_2021	cell projection organization (GO:0030030)	3.6074e-10	2.52761e-08	0	0	17.2276	374.577	CDC42;P2RY12;NCKAP1;RHOJ;RAC2;RHOG;RAC3;RHOH;RHOU;RAC1;RHOV;RHOQ
GO_Biological_Process_2021	positive regulation of angiogenesis (GO:0045766)	3.63639e-10	2.52761e-08	0	0	6.10615	132.716	ANGPT4;CXCL8;PDPK1;NOS3;SERPINE1;GATA6;TWIST1;HSPB1;PRKCA;GATA4;BRCA1;GATA2;HIF1A;F3;RHOB;VEGFA;RRAS;SP1;CYP1B1;HMOX1;PRKD1;JAK1
GO_Biological_Process_2021	positive regulation of protein serine/threonine kinase activity (GO:0071902)	3.92203e-10	2.67915e-08	0	0	6.44	139.486	MAP2K1;TGFB1;RALB;SRC;EGF;LRRK2;DIRAS1;ADIPOQ;DIRAS2;TNF;RHOA;EGFR;VEGFA;PPP2CA;CCND1;ERBB2;AKT1;MAPRE3;CALM2;HRAS;ELANE
GO_Biological_Process_2021	positive regulation of phosphorylation (GO:0042327)	5.68388e-10	3.81687e-08	0	0	3.94689	84.0222	APP;RALB;PRKAA2;ROCK2;LRRK2;ILK;HIF1A;TNF;EGFR;INS;CCND1;THPO;ERBB2;AKT1;RAC1;HRAS;NKX3-1;LYN;PDGFRA;TGFB1;MUSK;ANGPT1;EGF;HGF;ADIPOQ;F2;MMP9;VEGFA;AR;RAP2A;PIN1;KRAS;MET
GO_Biological_Process_2021	regulation of pri-miRNA transcription by RNA polymerase II (GO:1902893)	6.06239e-10	3.98359e-08	0	0	11.6939	248.187	IL10;JUN;TGFB1;STAT3;GATA3;NR3C1;GATA2;TNF;HIF1A;RELA;PPARG;PPARA;TP53;PPARD
GO_Biological_Process_2021	glucuronate metabolic process (GO:0019585)	6.13323e-10	3.98359e-08	0	0	38.6305	819.436	UGT1A10;UGT1A1;UGT2B15;UGT1A4;UGT1A3;UGT1A9;UGT2B7;UGT1A7;UGT1A6
GO_Biological_Process_2021	regulation of autophagy (GO:0010506)	9.35103e-10	5.97561e-08	0	0	4.07148	84.6475	GSK3B;PRKAA2;ROCK1;LRRK2;PRKAG1;ITPR1;KEAP1;PRKAG2;HSPB1;HMGB1;PRKAG3;FOXO1;DHRSX;CASP3;AKT1;MCL1;BOK;IL10;KDM4A;HGF;CSNK2A2;STAT3;MAPK15;RHEB;DDIT3;BCL2;VDAC1;ATM;PRKD1;MAPT;MET
GO_Biological_Process_2021	regulation of inflammatory response (GO:0050727)	1.05421e-09	6.62979e-08	0	0	4.29707	88.8225	RB1;APP;SERPINE1;ALOX15;GATA3;PTGS2;TNF;RELA;CASP1;NLRP3;JAK2;ELANE;IL10;CMA1;PRKCD;ADIPOQ;NR1H4;SELE;MMP9;MAPK13;NFKBIA;CYLD;IL6;PROC;PPARG;PPARA;MGLL;PTPN2;PPARD
GO_Biological_Process_2021	MAPK cascade (GO:0000165)	1.27405e-09	7.80825e-08	0	0	3.55375	72.7845	YWHAE;CSF2;CUL3;LRRK2;TNF;EGFR;NRAS;SPRED1;ERBB2;MAPK1;JAK2;HRAS;JAK1;MAP3K3;PDGFRA;MAP2K1;TGFB1;ANGPT1;EGF;HGF;NFKB1;MAPK12;MAPK13;MAPK11;PPP5C;MRAS;RIT2;TAOK3;PIK3CA;PTPRA;MAPKAPK2;KRAS;PTPN7;RAF1;MET;BCL2L1
GO_Biological_Process_2021	regulation of lipid metabolic process (GO:0019216)	1.28101e-09	7.80825e-08	0	0	6.7703	138.626	IDI1;FDPS;HMGCS1;CYP51A1;RORC;PRKAG2;HMGCR;LSS;ACACB;RXRA;GPAM;SP1;FASN;PMVK;PPARG;MVD;PPARA;PLPP1;PPARD
GO_Biological_Process_2021	regulation of cell migration (GO:0030334)	1.39158e-09	8.35369e-08	0	0	3.11936	63.6125	GRB7;MACF1;ROCK1;ROCK2;SRC;SERPINE1;PTEN;EGFR;PPM1F;INS;PPP3CA;PLAU;LMNA;AKT1;CYP1B1;RAC1;HRAS;PDGFRA;DUSP3;TGFB1;F10;EGF;HGF;STAT3;ADIPOQ;NOG;PRKCA;MITF;F3;RHOD;MMP9;MAPK15;RHOA;RHOB;VEGFA;RAP2C;FGR;F7;RAP2A;RAP2B;ATM;SGK1;MAPRE1
GO_Biological_Process_2021	positive regulation of epithelial cell migration (GO:0010634)	1.87941e-09	1.11137e-07	0	0	6.58907	132.39	ANGPT4;ANGPT1;ROCK2;SRC;EGF;PRKCA;GATA3;MMP9;HIF1A;PPM1F;RAB11A;RHOB;VEGFA;RAB25;RRAS;AKT1;RAC1;PRKD1;MAPRE2
GO_Biological_Process_2021	positive regulation of pri-miRNA transcription by RNA polymerase II (GO:1902895)	1.98958e-09	1.15922e-07	0	0	14.0924	282.346	IL10;JUN;TGFB1;STAT3;PPARG;GATA3;NR3C1;GATA2;TNF;HIF1A;TP53;RELA
GO_Biological_Process_2021	regulation of cell population proliferation (GO:0042127)	2.13946e-09	1.2284e-07	0	0	2.45007	48.9101	APP;TES;CSF2;CXCL8;PTEN;ASH2L;RERG;NAMPT;AKT1;CYP1B1;JAK2;HRAS;NKX3-1;BOK;IL10;PDGFRA;MAP2K1;CSNK2A1;RHOG;RHOA;CDC25B;AR;BIRC5;PRTN3;MVD;SGK1;RAF1;TP53;PLPP1;HDAC1;PLA2G1B;CUL3;PLG;GATA3;PPM1D;EGFR;RELA;INS;RAB25;THPO;LMNA;ERBB2;LYN;JUN;TGFB1;EGF;VDR;NOS3;STAT3;FN1;DHRS2;MAPK15;TSHR;VEGFA;IL6;CDK4;CDK2;BCL2;CTNNB1;PTPN6;KRAS;CDK13;COPS8;PTPN2
GO_Biological_Process_2021	cellular component disassembly (GO:0022411)	2.17032e-09	1.2284e-07	0	0	8.30011	165.574	PRSS1;TMPRSS6;CMA1;MMP2;CTRB2;CTRB1;KLK5;KLK4;PLG;KLK2;MMP9;KLK7;CTSG;TPSAB1;KLKB1;ELANE
GO_Biological_Process_2021	positive regulation of protein modification process (GO:0031401)	2.59186e-09	1.44633e-07	0	0	4.10953	81.249	APP;RALB;ROCK2;LRRK2;ILK;TNF;EGFR;CCND1;THPO;ERBB2;AKT1;RAC1;HRAS;NKX3-1;LYN;TGFB1;MUSK;ANGPT1;HGF;PRKCD;ADIPOQ;DYRK1A;F2;MMP9;VEGFA;RAP2A;PIN1;KRAS;CALM2
GO_Biological_Process_2021	peptidyl-threonine phosphorylation (GO:0018107)	4.36419e-09	2.40151e-07	0	0	8.63653	166.252	GSK3B;MAP2K1;CSNK2A1;ROCK1;PDPK1;ROCK2;LRRK2;PRKCD;CSNK2A2;DYRK1A;PRKCA;CHEK1;AKT1;MAPK1;PRKD1
GO_Biological_Process_2021	positive regulation of MAPK cascade (GO:0043410)	4.4298e-09	2.40423e-07	0	0	3.59899	69.2263	APP;ROCK1;ROCK2;DIRAS1;LRRK2;DIRAS2;ALOX15;GATA4;HMGB1;TNF;EGFR;ICAM1;INS;RAP1A;THPO;ERBB2;HRAS;ELANE;KLHDC10;PDGFRA;MAP2K1;TGFB1;ATP6AP1;ANGPT1;CCL20;EGF;PRKCA;PTPN11;VEGFA;IL6;RIT2;PTPRC;TAOK3
GO_Biological_Process_2021	neutrophil mediated immunity (GO:0002446)	4.50702e-09	2.41308e-07	0	0	2.82644	54.3175	CFD;TMEM63A;ROCK1;STXBP3;PLA2G1B;STXBP2;HP;HMGB1;RAP1B;NRAS;RAP1A;PLAU;MAPK1;CTSG;RAC1;PRSS3;GUSB;CTSD;ELANE;VAT1;ARSA;MGAM;IDH1;PRKCD;RHOG;RNASE3;AZU1;RHOF;MAPK14;PRDX6;MMP9;NFKB1;RHOA;RAP2C;FGR;ACLY;IL6;PTPRC;RAP2B;RAB14;IMPDH1;IMPDH2;CAT;PTPN6;PRTN3;CDK13;GLA
GO_Biological_Process_2021	regulation of signal transduction by p53 class mediator (GO:1901796)	4.86602e-09	2.57055e-07	0	0	4.74714	90.865	SUPT16H;BLM;PRKAA2;CSNK2A1;PDPK1;HDAC1;EHMT2;USP2;CSNK2A2;PRKAG1;PRKAG2;BRCA1;SSRP1;MAPK14;PRKAG3;MAPK11;CHEK1;CDK2;AKT1;PIN1;MAPKAPK5;ATM;SGK1;TP53
GO_Biological_Process_2021	regulation of cysteine-type endopeptidase activity involved in apoptotic process (GO:0043281)	4.95919e-09	2.58531e-07	0	0	6.5864	125.945	YWHAE;GPX1;SYK;CSNK2A1;SRC;HGF;HMGB1;TNF;PPM1F;VEGFA;RPS6KA1;CASP1;AKT1;NLRP3;CYCS;RAF1;CTSD;NKX3-1
GO_Biological_Process_2021	cellular response to DNA damage stimulus (GO:0006974)	5.64144e-09	2.8879e-07	0	0	3.21145	60.9955	TOP2A;FEN1;BLM;MCM7;BCL2A1;MCM9;ASH2L;BRCA1;FOXO1;POLB;CCND1;CHEK1;POLI;POLK;POLH;MCL1;BOK;LYN;PARP1;CBX1;RECQL;SIRT4;MAPK14;MAPK15;MAPK12;BATF;RAD51;TAOK3;DDIT3;TDP1;APEX1;ERCC1;MAPKAPK2;BCL2;BAX;ATM;TP53;BCL2L1
GO_Biological_Process_2021	regulation of gene expression (GO:0010468)	5.68541e-09	2.8879e-07	0	0	2.16133	41.0337	RB1;APP;GSK3B;CSF2;CXCL8;PRKAG1;AHR;BRCA1;NR3C1;TNF;CASP8;RPS6KA5;AKT1;HRAS;NKX3-1;IL10;MBNL1;MAP2K1;GPX1;MUSK;NOG;RHOH;MITF;F3;NR5A1;RBL2;AR;ACTA1;PTP4A3;DDIT3;MAPT;EZR;TP53;PRKAA2;ROCK1;ROCK2;HDAC1;HPN;NR1I2;TMPRSS4;GATA5;TWIST1;GATA4;GATA3;GATA2;HIF1A;PPM1F;RELA;INS;PPP2CA;MAPK9;MAPK1;LYN;KDM4A;TGFB1;ANGPT1;NOS2;EGF;VDR;NOS3;EPHX2;STAT3;FN1;AZU1;MAPK14;ESR1;NFKB1;ESR2;VEGFA;NUDT21;MAPK11;IL6;P…
GO_Biological_Process_2021	lipid biosynthetic process (GO:0008610)	5.99116e-09	3.00468e-07	0	0	7.00382	132.603	PRKAA2;PLA2G1B;IDI2;CYP51A1;HMGCR;LSS;HSD17B8;CYP19A1;ACSF3;ACLY;GPAM;HSD17B1;DOLPP1;AGPS;MVD;PDSS1;CBR4
GO_Biological_Process_2021	fatty acid biosynthetic process (GO:0006633)	6.80864e-09	3.37198e-07	0	0	7.54359	141.858	HPGD;PLA2G1B;EPHX2;ALOX15;CYP3A4;HACD3;PTGS2;HSD17B8;ACSF3;ACLY;CYP2C9;CYP2D6;CYP1A2;CYP1A1;DECR2;CBR4
GO_Biological_Process_2021	regulation of protein phosphorylation (GO:0001932)	7.8119e-09	3.82108e-07	0	0	3.59069	67.0296	APP;RALB;ROCK2;LRRK2;PTEN;ILK;HSPB1;TNF;EGFR;PPP2CA;CCND1;THPO;ERBB2;AKT1;RAC1;HRAS;NKX3-1;LYN;TGFB1;MUSK;ANGPT1;HGF;ADIPOQ;FN1;F2;MMP9;VEGFA;FGR;RAP2A;PIN1;KRAS;PLPP3
GO_Biological_Process_2021	regulation of peptidyl-tyrosine phosphorylation (GO:0050730)	8.63823e-09	4.17374e-07	0	0	6.31839	117.314	APP;ANGPT4;TGFB1;ANGPT1;SRC;HGF;PRKCD;PTPN11;GATA1;EGFR;VEGFA;RAP2C;IL6;RAP2B;PTPRC;PTPN6;JAK2;TP53
GO_Biological_Process_2021	cellular response to reactive oxygen species (GO:0034614)	9.01596e-09	4.30376e-07	0	0	8.09548	149.963	PDGFRA;JUN;PRKCD;MMP9;RELA;EGFR;RHOB;MAPK13;MAPK9;IL6;AKT1;CYP1B1;MAPK1;MAPT;NFE2L2
GO_Biological_Process_2021	neutrophil activation involved in immune response (GO:0002283)	1.06295e-08	4.99286e-07	0	0	2.77529	50.9533	CFD;TMEM63A;ROCK1;STXBP3;STXBP2;HP;HMGB1;RAP1B;NRAS;RAP1A;PLAU;MAPK1;CTSG;RAC1;PRSS3;GUSB;CTSD;ELANE;VAT1;ARSA;MGAM;SYK;IDH1;PRKCD;RHOG;RNASE3;AZU1;RHOF;MAPK14;PRDX6;MMP9;NFKB1;RHOA;RAP2C;FGR;ACLY;PTPRC;RAP2B;RAB14;IMPDH1;IMPDH2;CAT;PTPN6;PRTN3;CDK13;GLA
GO_Biological_Process_2021	negative regulation of multicellular organismal process (GO:0051241)	1.07116e-08	4.99286e-07	0	0	3.94086	72.3224	RB1;GSK3B;ROCK1;ROCK2;HPN;PTEN;GATA3;HMGCR;TNF;EGFR;INS;PPP2CA;SPRED1;RPS6KA5;SPX;NKX3-1;IL10;TGFB1;NOS3;NR1H2;ADIPOQ;CYP51A1;NR1H4;TWSG1;PROC;RHEB;DDIT3;ALDH1A1
GO_Biological_Process_2021	protein processing (GO:0016485)	1.52308e-08	7.01677e-07	0	0	5.67668	102.18	KLK1;F12;TMPRSS4;HP;TMPRSS2;KLK3;HPR;KLK2;PRSS12;F3;PHEX;KLK6;F7;F9;C1RL;CASP1;PRSS3;KLKB1;HGFAC
GO_Biological_Process_2021	regulation of MAPK cascade (GO:0043408)	1.70265e-08	7.75389e-07	0	0	4.41053	78.8977	LYN;MAP2K1;DUSP3;PHLPP1;SYK;ROCK1;ROCK2;EGF;FN1;HMGB1;EGFR;INS;IL6;SPRED1;PTPRC;RIT2;THPO;RRAS;TAOK3;ERBB2;MAPK1;PTPN6;PPEF2;HRAS
GO_Biological_Process_2021	arachidonic acid metabolic process (GO:0019369)	1.83464e-08	8.26007e-07	0	0	8.42519	150.085	CBR1;GPX1;EPHX2;ALOX15;EPHX1;CYP2C19;PTGS2;PTGS1;CYP2C9;CYP2D6;CYP1A2;CYP1A1;CYP1B1;MGLL
GO_Biological_Process_2021	monocarboxylic acid metabolic process (GO:0032787)	2.11984e-08	9.43687e-07	0	0	4.73693	83.6985	MECR;UGT1A1;CKM;CYP3A4;ACSF3;CYP2C9;SGPL1;AMACR;NPC1;GPAM;FASN;CYP1A2;CYP1A1;VDAC1;PPARG;UGT1A3;CKB;PPARA;UGT1A9;UGT1A8;UGT1A7;PPARD
GO_Biological_Process_2021	peptidyl-threonine modification (GO:0018210)	2.21753e-08	9.76205e-07	0	0	7.47119	131.674	GSK3B;MAP2K1;CSNK2A1;ROCK1;PDPK1;ROCK2;LRRK2;PRKCD;CSNK2A2;DYRK1A;PRKCA;CHEK1;AKT1;MAPK1;PRKD1
GO_Biological_Process_2021	neutrophil degranulation (GO:0043312)	2.32592e-08	1.01267e-06	0	0	2.73023	47.988	CFD;TMEM63A;ROCK1;STXBP3;STXBP2;HP;HMGB1;RAP1B;NRAS;RAP1A;PLAU;MAPK1;CTSG;RAC1;PRSS3;GUSB;CTSD;ELANE;VAT1;ARSA;MGAM;IDH1;PRKCD;RHOG;RNASE3;AZU1;RHOF;MAPK14;PRDX6;MMP9;NFKB1;RHOA;RAP2C;FGR;ACLY;PTPRC;RAP2B;RAB14;IMPDH1;IMPDH2;CAT;PTPN6;PRTN3;CDK13;GLA
GO_Biological_Process_2021	regulation of cell adhesion (GO:0030155)	2.7766e-08	1.19575e-06	0	0	4.88061	84.92	LYN;CXCL8;ROCK1;ANGPT1;ROCK2;SRC;CXCR4;PRKCA;PTPN11;AZU1;TNF;RHOD;RND1;VEGFA;PPP2CA;PPP3CA;PLAU;ERBB2;RAC2;ATM;TGM2
GO_Biological_Process_2021	lipid modification (GO:0030258)	4.06909e-08	1.73352e-06	0	0	9.99636	170.111	PLPP5;PLPP4;PLPPR2;EPHX2;ALOX15;CYP1A1;CYP3A4;PLPP3;SGPP2;PLPP2;SGPP1;PLPP1
GO_Biological_Process_2021	positive regulation of cell adhesion (GO:0045785)	4.17376e-08	1.74925e-06	0	0	6.47973	110.103	P2RY12;SYK;ALOX15;PRKCA;AZU1;TNF;RHOD;PPM1F;VEGFA;PPP3CA;ERBB2;RAC3;ATM;RAC1;JAK2;TGM2
GO_Biological_Process_2021	positive regulation of cell population proliferation (GO:0008284)	4.19433e-08	1.74925e-06	0	0	2.70387	45.9305	CSF2;HDAC1;PLA2G1B;CUL3;PTEN;ASH2L;TNF;EGFR;RELA;INS;RAB25;THPO;NAMPT;ERBB2;PIM1;AKT1;HMOX1;HRAS;ELANE;NKX3-1;LYN;MAP3K3;PDGFRA;TGFB1;CSNK2A1;EGF;FN1;RHOG;MAPK15;TSHR;CDC25B;VEGFA;AR;IL6;PTPRC;CDK4;CDK2;BCL2;BIRC5;PTPN6;PRTN3;MVD;KRAS;CDK13
GO_Biological_Process_2021	regulation of DNA-templated transcription, initiation (GO:2000142)	4.66546e-08	1.92547e-06	0	0	7.70654	130.09	JUN;CBFB;PTEN;TWIST1;MITF;PPM1D;RELA;NFKB1;IL6;CCND1;CDK4;BAX;CTNNB1;TP53
GO_Biological_Process_2021	peptidyl-threonine dephosphorylation (GO:0035970)	4.80115e-08	1.96105e-06	0	0	17.823	300.35	PPP2CA;PDP1;PPP2CB;PPM1A;PPP5C;PPM1B;PPM1D;PPM1E;PPM1F
GO_Biological_Process_2021	negative regulation of protein phosphorylation (GO:0001933)	6.55197e-08	2.64887e-06	0	0	4.40692	72.8944	RB1;LYN;TGFB1;PDPK1;LRRK2;PRKCD;ADIPOQ;NOG;PTEN;TWIST1;HSPB1;PRKAG2;PPM1E;PPM1F;SPRED1;PTPRC;AKT1;PTPN6;TAB1;PLPP3;PPEF2;CALM2
GO_Biological_Process_2021	regulation of primary metabolic process (GO:0080090)	9.24055e-08	3.69809e-06	0	0	4.72678	76.56	IDI1;FDPS;NQO1;HMGCS1;ROCK2;CYP51A1;HMGCR;ACACB;LSS;INS;RXRA;GPAM;SP1;FASN;PMVK;PPARG;MVD;PPARA;PLPP1;PPARD
GO_Biological_Process_2021	sterol biosynthetic process (GO:0016126)	9.90176e-08	3.92308e-06	0	0	10.5089	169.488	IDI1;FDPS;ACLY;HMGCS1;IDI2;PMVK;CYP51A1;PRKAG2;MVD;HMGCR;LSS
GO_Biological_Process_2021	negative regulation of signal transduction (GO:0009968)	1.07188e-07	4.20476e-06	0	0	3.31398	53.185	RB1;GRB7;CXCL8;LRP1;LRRK2;PTEN;GATA4;GATA3;GATA2;TNF;EGFR;ERBB2;AKT1;NKX3-1;LYN;IL10;PTPN1;PTGIR;CSNK2A1;EGF;PRKCD;CSNK2A2;NOG;ADIPOQ;KLK14;PTPRE;PTPRC;RPS6KB1;BCL2;PTPN2
GO_Biological_Process_2021	regulation of fatty acid metabolic process (GO:0019217)	1.25539e-07	4.87632e-06	0	0	20.5711	326.889	PRKAA2;ADIPOQ;PRKAG2;PPARG;PPARA;UGT1A8;INS;PPARD
GO_Biological_Process_2021	positive regulation of cell cycle (GO:0045787)	1.34652e-07	5.17952e-06	0	0	6.96372	110.17	APP;DUSP3;USP2;PRKCA;EGFR;CDC25B;TGM1;CCND1;RPS6KB1;CDK4;CHEK1;AKT1;MAPRE3;NKX3-1
GO_Biological_Process_2021	negative regulation of cell population proliferation (GO:0008285)	1.43629e-07	5.47171e-06	0	0	2.84416	44.8127	APP;TES;CXCL8;HPN;GATA6;PTEN;PLG;GATA3;GATA2;PPM1D;RERG;LMNA;CYP1B1;HMOX1;JAK2;EMD;HRAS;NKX3-1;LYN;IL10;MAP2K1;PTGIR;TGFB1;VDR;NOS3;NOG;DHRS2;AR;IL6;CTNNB1;PPARG;PTPN6;RAF1;COPS8;TP53;PLPP1;PTPN2
GO_Biological_Process_2021	regulation of protein kinase activity (GO:0045859)	1.55092e-07	5.85213e-06	0	0	5.07741	79.61	RB1;PDPK1;PRKAG1;HSPB1;PRKAG2;AZU1;TNF;PPM1E;PPM1F;RAP2C;FGR;SPRED1;RAP1A;PTPRC;RAP2B;AKT1;MAPRE3;TAB1
GO_Biological_Process_2021	vascular endothelial growth factor receptor signaling pathway (GO:0048010)	1.64363e-07	6.14345e-06	0	0	6.83197	106.723	NCKAP1;ROCK1;ROCK2;SRC;HSPB1;MAPK14;RHOA;VEGFA;CDC42;MAPK11;PIK3CA;MAPKAPK2;RAC1;PRKD1
GO_Biological_Process_2021	response to UV (GO:0009411)	1.66497e-07	6.16507e-06	0	0	5.37566	83.9048	FEN1;GPX1;PCNA;PARP1;PRKCD;REV1;RELA;EGFR;MAPK13;CCND1;CAT;USP1;AKT1;POLK;TP53;ELANE;POLH
GO_Biological_Process_2021	aortic valve morphogenesis (GO:0003180)	1.70082e-07	6.2395e-06	0	0	11.7122	182.557	RB1;TGFB1;ROCK1;ROCK2;NOS3;NPPA;GATA5;TWIST1;GATA4;GATA3
GO_Biological_Process_2021	positive regulation of lipid metabolic process (GO:0045834)	1.78044e-07	6.47164e-06	0	0	14.4789	225.02	ADIPOQ;SIRT4;AKT1;HSD17B13;PPARG;F2;PPARA;INS;PPARD
GO_Biological_Process_2021	cellular response to organic substance (GO:0071310)	1.80758e-07	6.51058e-06	0	0	4.74455	73.6643	TGFB1;LRRK2;STAT3;NR1H4;CXCR4;PTPN11;TNF;RHOA;NDOR1;RPS6KB1;ERBB2;CYP1A1;CASP1;CYP1B1;CTNNB1;PTPN6;PTPN7;EMD;PTPN2
GO_Biological_Process_2021	negative regulation of apoptotic signaling pathway (GO:2001234)	1.90299e-07	6.79248e-06	0	0	6.16316	95.3729	RB1;GPX1;CSNK2A1;SRC;HGF;CSNK2A2;GATA4;TNF;MMP9;RELA;AR;BCL2;AKT1;MCL1;BCL2L1
GO_Biological_Process_2021	fatty acid metabolic process (GO:0006631)	2.06035e-07	7.2885e-06	0	0	4.69911	72.3439	MECR;GPX1;HPGD;PLA2G1B;ADIPOQ;ALOX15;PTGS2;ACSF3;HSD17B8;ACLY;SGPL1;GPAM;FASN;CYP1A1;PPARG;PPARA;UGT1A8;CBR4;PPARD
GO_Biological_Process_2021	positive regulation of DNA-binding transcription factor activity (GO:0051091)	2.16787e-07	7.50817e-06	0	0	3.35674	51.507	APP;PLA2G1B;CEBPG;PTEN;TNF;RELA;INS;RPS6KA5;AKT1;NLRP3;IL10;STAT3;TRAF2;ESR1;NFKB1;ESR2;VEGFA;NFKBIA;AR;IL6;COPS5;DDIT3;CTNNB1;PPARG;PRKD1;TAB1;PLPP3;RHEBL1
GO_Biological_Process_2021	estrogen biosynthetic process (GO:0006703)	2.1793e-07	7.50817e-06	0	0	51.3093	787.039	HSD17B1;HSD17B2;HSD17B14;HSD17B11;HSD17B8;CYP19A1
GO_Biological_Process_2021	negative regulation of protein activation cascade (GO:2000258)	2.1793e-07	7.50817e-06	0	0	51.3093	787.039	F7;F8;F10;F12;F3;KLKB1
GO_Biological_Process_2021	cellular response to chemical stress (GO:0062197)	2.24756e-07	7.67657e-06	0	0	5.24712	80.3242	GPX2;GPX1;PRKAA2;PARP1;LRRK2;TXNRD1;GSR;KEAP1;PRDX6;DHRS2;FOXO1;PIK3CA;CAT;CYCS;ATM;PRKD1;NFE2L2
GO_Biological_Process_2021	response to cytokine (GO:0034097)	2.31333e-07	7.83369e-06	0	0	4.23367	64.6879	APP;SRC;ADIPOQ;STAT3;CXCR4;PRKCA;PTPN11;SELE;RHOA;RELA;CASP8;CASP3;MAPKAPK2;BCL2;CASP1;PTPN6;PTPN7;JAK2;PTPN2;MCL1;BCL2L1
GO_Biological_Process_2021	response to reactive oxygen species (GO:0000302)	2.35378e-07	7.8508e-06	0	0	7.30218	111.446	PDGFRA;JUN;GPX1;HP;MMP9;HIF1A;EGFR;MAPK9;CAT;AKT1;HMOX1;MAPK1;MAPT
GO_Biological_Process_2021	apoptotic cell clearance (GO:0043277)	2.35801e-07	7.8508e-06	0	0	11.2024	170.951	LRP1;ALOX15;RAC2;RHOG;RHOH;HMGB1;RAC1;RHOBTB1;RHOBTB2;TGM2
GO_Biological_Process_2021	cellular response to lipid (GO:0071396)	2.55996e-07	8.45214e-06	0	0	3.51569	53.3616	CXCL8;ROCK2;SERPINE1;RORC;AHR;HMGB1;CXCL13;NR3C1;CXCL2;RELA;EGFR;CASP1;NLRP3;CTSG;NKX3-1;LYN;IL10;NR1H4;GPBAR1;MAPK14;ESR1;RHOA;NFKB1;AR;IL6;ATM
GO_Biological_Process_2021	response to lipid (GO:0033993)	2.70435e-07	8.85509e-06	0	0	4.86484	73.5721	TGFB1;NOS2;NOS3;STAT3;GATA6;CYP19A1;SELE;ESR1;FOXO1;RXRA;MAPKAPK2;HSD17B2;CTNNB1;PPARG;JAK2;PPARA;NKX3-1;PPARD
GO_Biological_Process_2021	regulation of interleukin-8 production (GO:0032677)	3.19339e-07	1.03136e-05	0	0	5.8821	87.9786	IL10;SYK;NOS2;PLA2G1B;SERPINE1;ADIPOQ;STAT3;HMGB1;TNF;F3;RELA;IL6;PTPRC;DDIT3;ELANE
GO_Biological_Process_2021	negative regulation of extrinsic apoptotic signaling pathway via death domain receptors (GO:1902042)	3.22789e-07	1.03136e-05	0	0	10.735	160.449	GSK3B;CASP8;GPX1;NOS3;SERPINE1;HMOX1;TRAF2;BRCA1;ICAM1;BCL2L1
GO_Biological_Process_2021	secondary alcohol biosynthetic process (GO:1902653)	3.22789e-07	1.03136e-05	0	0	10.735	160.449	IDI1;FDPS;ACLY;HMGCS1;IDI2;PMVK;CYP51A1;MVD;HMGCR;LSS
GO_Biological_Process_2021	negative regulation of lipid storage (GO:0010888)	3.37863e-07	1.07089e-05	0	0	17.1408	255.409	NFKBIA;IL6;NR1H2;PPARG;PPARA;TNF;PTPN2;PPARD
GO_Biological_Process_2021	myeloid leukocyte differentiation (GO:0002573)	3.51474e-07	1.10519e-05	0	0	6.35121	94.3861	CSF2;PARP1;MAPK14;MMP9;DHRS2;BATF;VEGFA;CDC42;CASP8;RXRA;CDK4;CDK2;PPARG;PRTN3
GO_Biological_Process_2021	positive regulation of interleukin-8 production (GO:0032757)	3.56142e-07	1.10611e-05	0	0	6.9972	103.894	SYK;NOS2;PLA2G1B;SERPINE1;ADIPOQ;STAT3;HMGB1;TNF;F3;RELA;IL6;DDIT3;ELANE
GO_Biological_Process_2021	positive regulation of signal transduction (GO:0009967)	3.57351e-07	1.10611e-05	0	0	3.2658	48.4793	MACF1;SRC;LRRK2;KLK5;PTEN;ILK;GATA3;SLC2A4;HIF1A;KLK6;INS;JAK2;NKX3-1;CSNK2A1;IFNB1;NOS3;STAT3;ADIPOQ;KLK14;PRKCA;PTPN11;F3;F7;IL6;PTPRC;PDCL;BAX;MYORG
GO_Biological_Process_2021	regulation of intrinsic apoptotic signaling pathway (GO:2001242)	4.00518e-07	1.23012e-05	0	0	7.74355	114.066	CYLD;LCK;SRC;DDIT3;BCL2;BAX;MMP9;TP53;BOK;NKX3-1;MCL1;BCL2L1
GO_Biological_Process_2021	negative regulation of cellular process (GO:0048523)	4.04938e-07	1.23413e-05	0	0	2.3917	35.2047	RB1;APP;BLM;TES;CXCL8;HPGD;EI24;GMNN;PTEN;PLG;GATA3;PPM1D;KLK8;RERG;RND1;PPP2CA;LMNA;CYP1B1;JAK2;HRAS;NKX3-1;LYN;IL10;MAP2K1;TGFB1;ANGPT1;APOBEC3G;VDR;NOS3;NR1H2;ADIPOQ;DHRS2;ESR2;RHOB;AR;IL6;BCL2;TXNIP;CTNNB1;PTPN6;PRTN3;PRKD1;COPS8;RAF1;TP53;PTPN2;PLPP1
GO_Biological_Process_2021	positive regulation of cell migration (GO:0030335)	4.19779e-07	1.26457e-05	0	0	3.15862	46.3797	GRB7;ROCK2;SRC;HIF1A;EGFR;PPM1F;INS;PPP3CA;RAB25;PLAU;HRAS;PDGFRA;TGFB1;F10;EGF;HGF;STAT3;FN1;PRKCA;RHOD;F3;MMP9;RAB11A;VEGFA;FGR;F7;PTPRC;ATM;MAPRE1
GO_Biological_Process_2021	extrinsic apoptotic signaling pathway (GO:0097191)	4.2131e-07	1.26457e-05	0	0	6.24138	91.6228	GSK3B;TGFB1;BCL2A1;PDPK1;TRAF2;TNF;CASP8;CASP3;BCL2;BAX;JAK2;BOK;MCL1;BCL2L1
GO_Biological_Process_2021	cholesterol biosynthetic process (GO:0006695)	4.36673e-07	1.29956e-05	0	0	10.3051	150.909	IDI1;FDPS;ACLY;HMGCS1;IDI2;PMVK;CYP51A1;MVD;HMGCR;LSS
GO_Biological_Process_2021	monoterpenoid metabolic process (GO:0016098)	4.42809e-07	1.29956e-05	0	0	128.116	1874.35	CYP2C9;CYP2D6;CYP1A2;CYP3A4;CYP2C19
GO_Biological_Process_2021	response to angiotensin (GO:1990776)	4.42809e-07	1.29956e-05	0	0	128.116	1874.35	ROCK1;ROCK2;PRKCD;RELA;NFKB1
GO_Biological_Process_2021	negative regulation of response to external stimulus (GO:0032102)	4.59446e-07	1.33027e-05	0	0	4.66927	68.1398	RB1;IL10;DUSP3;SERPINE1;PRKCD;ADIPOQ;PTEN;NR1H4;GATA3;KLK8;PPM1B;PROC;NLRP3;PPARG;PPARA;ELANE;PTPN2;PPARD
GO_Biological_Process_2021	regulation of phosphatidylinositol 3-kinase signaling (GO:0014066)	4.59986e-07	1.33027e-05	0	0	4.95104	72.246	LYN;PDGFRA;SRC;EGF;HGF;FN1;PTEN;TWIST1;TNF;EGFR;INS;FGR;PIK3CA;MAPK1;PTPN6;JAK2;NKX3-1
GO_Biological_Process_2021	negative regulation of inflammatory response (GO:0050728)	4.93105e-07	1.41571e-05	0	0	3.48526	50.6149	RB1;SRC;GATA3;PTH1R;INS;PRKACG;NLRP3;ELANE;LYN;IL10;PTGIR;SYK;PRKCD;ADIPOQ;NR1H4;GPBAR1;MAPK14;TSHR;FGR;IL6;PROC;PPARG;PPARA;PTPN2;PPARD
GO_Biological_Process_2021	positive regulation of cysteine-type endopeptidase activity involved in apoptotic process (GO:0043280)	5.22527e-07	1.48285e-05	0	0	4.6228	66.8669	SYK;TRAF2;HMGB1;TNF;F3;PPM1F;CASP8;LCK;CASP1;NLRP3;CYCS;BAX;PPARG;MAPT;JAK2;CTSD;NKX3-1;BOK
GO_Biological_Process_2021	extrinsic apoptotic signaling pathway in absence of ligand (GO:0097192)	5.27717e-07	1.48285e-05	0	0	15.8215	228.695	GSK3B;BCL2A1;CASP3;BCL2;BAX;BCL2L1;BOK;MCL1
GO_Biological_Process_2021	retinol metabolic process (GO:0042572)	5.27717e-07	1.48285e-05	0	0	15.8215	228.695	SDR16C5;RDH11;CYP2D6;RDH10;CYP1A2;CYP1A1;CYP1B1;CYP3A4
GO_Biological_Process_2021	cellular response to growth factor stimulus (GO:0071363)	5.60434e-07	1.56369e-05	0	0	3.98478	57.3591	TGFB1;CXCL8;DUSP3;PDPK1;HGF;HSPB1;PTPN11;NR3C1;MAPK14;RELA;EGFR;VEGFA;RAP1A;RPS6KB1;MAPKAPK2;ERBB2;AKT1;CTNNB1;PRKD1;MAPT;EMD
GO_Biological_Process_2021	aortic valve development (GO:0003176)	5.8425e-07	1.61874e-05	0	0	9.90823	142.212	RB1;TGFB1;ROCK1;ROCK2;NOS3;NPPA;GATA5;TWIST1;GATA4;GATA3
GO_Biological_Process_2021	protein autophosphorylation (GO:0046777)	6.23189e-07	1.71464e-05	0	0	3.95569	56.5206	LYN;PDGFRA;GSK3B;MAP3K3;MUSK;PDPK1;SRC;LRRK2;DYRK1A;MAPK15;EGFR;FGR;TAOK3;MAPKAPK2;ERBB2;PIM1;AKT1;MAPKAPK5;ATM;PRKD1;JAK2
GO_Biological_Process_2021	regulation of MAP kinase activity (GO:0043405)	6.74736e-07	1.84366e-05	0	0	5.11525	72.6823	LYN;PTPN1;TGFB1;EGF;LRRK2;DIRAS1;PRKCD;ADIPOQ;DIRAS2;TNF;EGFR;VEGFA;ERBB2;PPEF2;HRAS;ELANE
GO_Biological_Process_2021	ERBB signaling pathway (GO:0038127)	9.31785e-07	2.52858e-05	0	0	6.33543	87.9749	GRB7;TGFB1;PDPK1;SRC;EGF;PRKCA;PTPN11;EGFR;RPS6KA5;PIK3CA;ERBB2;AKT1;MAPK1
GO_Biological_Process_2021	cholesterol metabolic process (GO:0008203)	9.94297e-07	2.67987e-05	0	0	5.74453	79.3965	IDI1;CETP;FDPS;HMGCS1;IDI2;CYP51A1;HMGCR;LSS;ACLY;RXRA;FDX1;PMVK;MVD;PPARD
GO_Biological_Process_2021	regulation of apoptotic signaling pathway (GO:2001233)	1.01462e-06	2.71615e-05	0	0	9.19954	126.963	RB1;CYLD;CSNK2A1;IFNB1;CSNK2A2;BCL2;GATA4;TNF;BCL2L14;NKX3-1
GO_Biological_Process_2021	long-chain fatty acid biosynthetic process (GO:0042759)	1.05192e-06	2.79712e-05	0	0	11.0287	151.809	CYP2C9;HPGD;CYP2D6;EPHX2;ALOX15;CYP1A2;CYP1A1;CYP3A4;PTGS2
GO_Biological_Process_2021	phospholipid dephosphorylation (GO:0046839)	1.31854e-06	3.45965e-05	0	0	8.88185	120.251	PLPP5;PLPP4;PLPPR2;EPHX2;PTEN;PLPP3;SGPP2;PLPP2;SGPP1;PLPP1
GO_Biological_Process_2021	regulation of peptidyl-threonine phosphorylation (GO:0010799)	1.31854e-06	3.45965e-05	0	0	8.88185	120.251	APP;SPRED1;TGFB1;EGF;PLK1;PRKAG2;MAPK1;AZU1;PPEF2;CALM2
GO_Biological_Process_2021	intrinsic apoptotic signaling pathway (GO:0097193)	1.3535e-06	3.528e-05	0	0	4.81659	65.0858	BCL2A1;CUL3;PRKCD;ITPR1;TRAF2;BRCA1;PPM1F;DDIT3;BCL2;CYP1B1;BAX;ATM;TP53;MCL1;BCL2L1;BOK
GO_Biological_Process_2021	peptide cross-linking (GO:0018149)	1.43275e-06	3.68608e-05	0	0	10.5268	141.648	TGM1;FN1;F13A1;TGM7;TGM6;TGM5;TGM4;TGM3;TGM2
GO_Biological_Process_2021	regulation of macrophage derived foam cell differentiation (GO:0010743)	1.43275e-06	3.68608e-05	0	0	10.5268	141.648	NFKBIA;CETP;MAPK9;CSF2;NR1H2;ADIPOQ;PPARG;PPARA;NFKB1
GO_Biological_Process_2021	terpenoid metabolic process (GO:0006721)	1.50139e-06	3.83774e-05	0	0	64.0546	858.916	CYP2C9;CYP2D6;CYP1A2;CYP3A4;CYP2C19
GO_Biological_Process_2021	positive regulation of MAP kinase activity (GO:0043406)	1.5865e-06	4.02931e-05	0	0	5.9951	80.0584	TGFB1;EGF;LRRK2;DIRAS1;DIRAS2;TRAF2;TNF;EGFR;VEGFA;TAOK3;ERBB2;HRAS;ELANE
GO_Biological_Process_2021	response to hydrogen peroxide (GO:0042542)	1.64023e-06	4.13924e-05	0	0	7.46259	99.4067	IL6;GPX1;PRKCD;CAT;HP;CYP1B1;HMOX1;RELA;RHOB;MAPK13;NFE2L2
GO_Biological_Process_2021	positive regulation of apoptotic signaling pathway (GO:2001235)	1.70438e-06	4.27388e-05	0	0	6.58785	87.5019	CYLD;LCK;IFNB1;DDIT3;BCL2;BAX;TRAF2;TNF;TP53;BOK;NKX3-1;BCL2L1
GO_Biological_Process_2021	negative regulation of gene expression (GO:0010629)	1.97274e-06	4.91572e-05	0	0	2.78489	36.5826	RB1;APP;GRB7;CXCL8;PRKAA2;ROCK2;HDAC1;GATA5;GATA2;PPM1D;HIF1A;TNF;RPS6KA5;HRAS;NKX3-1;IL10;KDM4A;MAP2K1;TGFB1;NOS2;VDR;EED;GZMB;ESR1;NFKB1;VEGFA;DHFR;RBL2;TWSG1;MAPT;MPHOSPH8
GO_Biological_Process_2021	response to organic cyclic compound (GO:0014070)	2.05793e-06	5.09594e-05	0	0	6.45027	84.4586	DHFR;TGFB1;LRRK2;STAT3;CYP1A1;CYP1B1;CTNNB1;TRPV1;TNF;CYP19A1;ESR1;NKX3-1
GO_Biological_Process_2021	cellular response to peptide hormone stimulus (GO:0071375)	2.28627e-06	5.62622e-05	0	0	4.60156	59.7678	PARP1;PDPK1;SRC;PLA2G1B;PRKCD;ADIPOQ;SLC2A4;FOXO1;NFKB1;RELA;TSHR;RPS6KB1;PRKACG;AKT1;PPARG;RHOQ
GO_Biological_Process_2021	regulation of production of miRNAs involved in gene silencing by miRNA (GO:1903798)	2.36975e-06	5.79566e-05	0	0	16.3407	211.657	MAP2K1;IL6;TGFB1;TNF;ESR1;TP53;EGFR
GO_Biological_Process_2021	DNA metabolic process (GO:0006259)	2.3915e-06	5.81297e-05	0	0	2.93404	37.9771	TOP2A;TOP2B;FEN1;BLM;PCNA;MCM7;GMNN;BRCA1;HMGB1;POLB;NT5E;CDC45;CHEK1;POLI;POLL;POLK;POLH;PARP1;RECQL;XRCC1;RAD51;TDP1;APEX1;ERCC1;CDK2;ATM;TOP1;MCM2
GO_Biological_Process_2021	positive regulation of peptidyl-threonine phosphorylation (GO:0010800)	2.45197e-06	5.92359e-05	0	0	12.0963	156.267	APP;TGFB1;EGF;PLK1;PRKAG2;MAPK1;AZU1;CALM2
GO_Biological_Process_2021	primary alcohol metabolic process (GO:0034308)	2.56099e-06	6.14948e-05	0	0	9.64859	124.227	PECR;SDR16C5;RDH11;CYP2D6;RDH10;CYP1A2;CYP1A1;CYP1B1;CYP3A4
GO_Biological_Process_2021	cellular response to lipopolysaccharide (GO:0071222)	2.7319e-06	6.49479e-05	0	0	4.27496	54.7644	LYN;IL10;TGFB1;CXCL8;SERPINE1;HMGB1;CXCL13;MAPK14;TNF;CXCL2;NFKB1;RHOA;RELA;IL6;CASP1;NLRP3;CTSG
GO_Biological_Process_2021	regulation of cell motility (GO:2000145)	2.7398e-06	6.49479e-05	0	0	4.05705	51.9612	MACF1;TGFB1;ROCK1;ROCK2;EGF;TWIST1;GATA3;RHOA;EGFR;RHOB;LMNA;ERBB2;AKT1;PIN1;RAC1;PKN1;RAF1;SGK1
GO_Biological_Process_2021	regulation of extrinsic apoptotic signaling pathway via death domain receptors (GO:1902041)	2.75398e-06	6.49479e-05	0	0	8.04792	103.033	GSK3B;CASP8;GPX1;NOS3;SERPINE1;HMOX1;TRAF2;BRCA1;ICAM1;BCL2L1
GO_Biological_Process_2021	positive regulation of DNA binding (GO:0043388)	3.36675e-06	7.84651e-05	0	0	9.26217	116.718	RB1;TGFB1;EGF;CEBPG;TWIST1;PPARG;HMGB1;GATA3;MMP9
GO_Biological_Process_2021	positive regulation of mitochondrial outer membrane permeabilization involved in apoptotic signaling pathway (GO:1901030)	3.36675e-06	7.84651e-05	0	0	9.26217	116.718	YWHAE;GSK3B;CASP8;PPP3CC;BCL2;GZMB;BAX;TP53;BOK
GO_Biological_Process_2021	negative regulation of defense response (GO:0031348)	3.40097e-06	7.8799e-05	0	0	5.09514	64.1552	RB1;IL10;ADIPOQ;PRKCD;NR1H4;GATA3;PPM1B;PROC;NLRP3;PPARG;PPARA;ELANE;PTPN2;PPARD
GO_Biological_Process_2021	regulation of cytokine-mediated signaling pathway (GO:0001959)	3.60995e-06	8.26515e-05	0	0	5.50226	68.9533	PTPN1;SYK;CBFB;TRAF2;PTPN11;TNF;CYLD;CASP8;PTPRC;PTPN6;JAK2;PTPN2;JAK1
GO_Biological_Process_2021	positive regulation of cell motility (GO:2000147)	3.6205e-06	8.26515e-05	0	0	3.17001	39.7167	GRB7;PDGFRA;TGFB1;F10;ROCK2;EGF;HGF;STAT3;TWIST1;PRKCA;RHOD;F3;MMP9;EGFR;PPM1F;VEGFA;INS;FGR;PPP3CA;F7;PLAU;ATM;MAPRE1;HRAS
GO_Biological_Process_2021	diol metabolic process (GO:0034311)	3.62983e-06	8.26515e-05	0	0	14.9782	187.622	NOS3;AKT1;PLPP3;SGPP2;PLPP2;SGPP1;PLPP1
GO_Biological_Process_2021	negative regulation of macrophage derived foam cell differentiation (GO:0010745)	3.90814e-06	8.79776e-05	0	0	21.9851	273.769	NFKBIA;CETP;NR1H2;ADIPOQ;PPARG;PPARA
GO_Biological_Process_2021	regulation of fibrinolysis (GO:0051917)	3.90814e-06	8.79776e-05	0	0	21.9851	273.769	F12;F11;SERPINE1;PLG;F2;KLKB1
GO_Biological_Process_2021	regulation of tumor necrosis factor production (GO:0032680)	4.31377e-06	9.65329e-05	0	0	4.11429	50.8267	IL10;APP;ARG2;SYK;ADIPOQ;STAT3;NR1H4;TWIST1;HSPB1;PTPN11;AZU1;HMGB1;IL6;PTPRC;MAPKAPK2;PTPN6;JAK2
GO_Biological_Process_2021	homotypic cell-cell adhesion (GO:0034109)	4.33692e-06	9.65329e-05	0	0	7.57373	93.523	P2RY12;PDGFRA;RAP2B;STXBP3;STXBP1;FN1;ILK;HSPB1;PLPP3;GATA1
GO_Biological_Process_2021	regulation of lipid biosynthetic process (GO:0046890)	4.38102e-06	9.69698e-05	0	0	8.90547	109.878	NR5A1;PRKAA2;ADIPOQ;SIRT4;PRKAG2;AKT1;HSD17B13;PPARA;INS
GO_Biological_Process_2021	negative regulation of macromolecule metabolic process (GO:0010605)	4.52002e-06	9.92991e-05	0	0	3.32349	40.9022	RB1;APP;KDM4A;MAP2K1;TGFB1;CXCL8;PRKAA2;NOS2;VDR;ROCK2;HDAC1;GATA5;GATA2;HIF1A;TNF;ESR1;NFKB1;VEGFA;RBL2;MAPT;HRAS;NKX3-1
GO_Biological_Process_2021	regulation of focal adhesion assembly (GO:0051893)	4.53638e-06	9.92991e-05	0	0	6.59313	81.1178	MACF1;DUSP3;ROCK1;ROCK2;SRC;PTPRA;PTEN;RAC1;RHOA;PPM1F;VEGFA
GO_Biological_Process_2021	negative regulation of endothelial cell apoptotic process (GO:2000352)	4.70611e-06	0.000101889	0	0	10.8218	132.748	IL10;ANGPT1;PDPK1;SERPINE1;GATA3;GATA2;ICAM1;NFE2L2
GO_Biological_Process_2021	positive regulation of mitotic cell cycle (GO:0045931)	4.70611e-06	0.000101889	0	0	10.8218	132.748	APP;DUSP3;RPS6KB1;CUL3;USP2;PRKCA;NKX3-1;CDC25B
GO_Biological_Process_2021	actin filament organization (GO:0007015)	4.84238e-06	0.000104269	0	0	3.7044	45.3348	PLA2G1B;RHOBTB3;RHOG;RHOH;RHOF;RND2;RND3;RHOD;RHOBTB1;RHOA;RHOBTB2;RND1;RHOB;CDC42;ACTA1;RAC2;GAS2;RAC3;RAC1
GO_Biological_Process_2021	negative regulation of transcription, DNA-templated (GO:0045892)	5.06892e-06	0.000108557	0	0	1.92085	23.4198	RB1;CSF2;THRB;EHMT2;GMNN;RORC;AHR;BRCA1;HMGB1;NR3C1;TNF;IKZF5;SDR16C5;RPS6KA5;CCND1;TRPS1;SAP130;NKX3-1;PARP1;EED;USP2;ADIPOQ;NOG;MITF;AR;PPM1A;DDIT3;BIRC5;PPARG;PPARA;EZR;TP53;PPARD;CBFB;HDAC1;TMPRSS6;FOXG1;NR1I2;GATA6;TWIST1;GATA3;GATA1;FOXO1;PPM1F;RELA;DNAJB1;RXRA;ELANE;KDM4A;JUN;TGFB1;VDR;NR1H2;PLK1;STAT3;NR1H4;ESR1;NFKB1;ESR2;VEGFA;ZGLP1;ID4;CTNNB1;MPHOSPH8
GO_Biological_Process_2021	positive regulation of chemotaxis (GO:0050921)	5.38863e-06	0.00011417	0	0	7.35695	89.2488	P2RY12;F7;IL6;TGFB1;HSPB1;PRKD1;F3;MET;PPM1F;VEGFA
GO_Biological_Process_2021	positive regulation of RNA metabolic process (GO:0051254)	5.38863e-06	0.00011417	0	0	7.35695	89.2488	MAP2K1;IL6;TGFB1;DYRK1A;RIOK1;HRAS;TP53;RELA;EGFR;NFKB1
GO_Biological_Process_2021	negative regulation of cysteine-type endopeptidase activity involved in apoptotic process (GO:0043154)	5.47866e-06	0.00011546	0	0	6.44295	78.0541	YWHAE;GPX1;CSNK2A1;SRC;HGF;RPS6KA1;AKT1;RAF1;TNF;MMP9;VEGFA
GO_Biological_Process_2021	platelet aggregation (GO:0070527)	5.64662e-06	0.00011837	0	0	8.57519	103.626	P2RY12;PDGFRA;RAP2B;STXBP3;STXBP1;FN1;ILK;HSPB1;GATA1
GO_Biological_Process_2021	positive regulation of endothelial cell proliferation (GO:0001938)	5.71034e-06	0.000118452	0	0	5.24352	63.3063	PDPK1;EGF;PRKCA;HMGB1;GATA2;F3;HIF1A;VEGFA;NRAS;SP1;AKT1;HMOX1;PRKD1
GO_Biological_Process_2021	positive regulation of phosphatidylinositol 3-kinase signaling (GO:0014068)	5.71034e-06	0.000118452	0	0	5.24352	63.3063	LYN;PDGFRA;SRC;EGF;HGF;FN1;TNF;INS;FGR;PIK3CA;PTPN6;JAK2;NKX3-1
GO_Biological_Process_2021	cellular response to interleukin-6 (GO:0071354)	6.37116e-06	0.000131472	0	0	10.2802	122.99	IL6;SRC;STAT3;PTPN11;JAK2;RELA;NFKB1;JAK1
GO_Biological_Process_2021	peptidyl-tyrosine modification (GO:0018212)	6.58732e-06	0.000133826	0	0	6.29945	75.1547	FGR;LYN;PDGFRA;SYK;LCK;SRC;ERBB2;DYRK1A;PTPN6;JAK2;EGFR
GO_Biological_Process_2021	microvillus organization (GO:0032528)	6.6204e-06	0.000133826	0	0	19.236	229.396	RAP2C;RAP1B;RAP2A;RAP2B;RAP1A;EZR
GO_Biological_Process_2021	peptidyl-serine dephosphorylation (GO:0070262)	6.6204e-06	0.000133826	0	0	19.236	229.396	PPP2CA;PPP3CA;PPP2CB;PPP5C;PPTC7;PPM1F
GO_Biological_Process_2021	retinal metabolic process (GO:0042574)	6.6204e-06	0.000133826	0	0	19.236	229.396	DHRS13;SDR16C5;RDH11;RDH10;CYP1B1;RDH13
GO_Biological_Process_2021	regulation of cellular protein localization (GO:1903827)	6.65413e-06	0.000133826	0	0	7.15222	85.2564	PTPN1;RALB;PRKAA2;PARP1;EGF;PIN1;CTNNB1;MAPT;PPM1F;RAB11B
GO_Biological_Process_2021	positive regulation of binding (GO:0051099)	6.79516e-06	0.000135972	0	0	4.75869	56.6251	APP;GSK3B;RALB;LRP1;EGF;LRRK2;GMNN;CEBPG;HMGB1;MMP9;FKBP1A;PIN1;PPARG;MET
GO_Biological_Process_2021	negative regulation of epithelial cell apoptotic process (GO:1904036)	7.21294e-06	0.000142888	0	0	8.2685	97.896	IL10;ANGPT1;PDPK1;SERPINE1;GATA3;GATA2;PPARA;ICAM1;NFE2L2
GO_Biological_Process_2021	regulation of microtubule cytoskeleton organization (GO:0070507)	7.21294e-06	0.000142888	0	0	8.2685	97.896	GSK3B;CYLD;PRKAA2;ROCK1;STMN4;MAPRE3;MAPT;MAPRE1;MAPRE2
GO_Biological_Process_2021	icosanoid metabolic process (GO:0006690)	7.88658e-06	0.000155456	0	0	6.16218	72.4078	CYP2C9;GPX1;HPGD;CYP2D6;MAPKAPK2;ALOX15;EPHX1;CYP1B1;PTGS2;MGLL;PTGS1
GO_Biological_Process_2021	epidermal growth factor receptor signaling pathway (GO:0007173)	8.16864e-06	0.000159429	0	0	6.95855	81.5209	GRB7;RPS6KA5;TGFB1;PIK3CA;SRC;EGF;PDPK1;AKT1;PTPN11;EGFR
GO_Biological_Process_2021	regulation of DNA binding (GO:0051101)	8.16864e-06	0.000159429	0	0	6.95855	81.5209	NFKBIA;JUN;TGFB1;EGF;GZMA;CEBPG;PPARG;HMGB1;JAK2;MMP9
GO_Biological_Process_2021	regulation of response to external stimulus (GO:0032101)	8.2438e-06	0.000160108	0	0	3.89461	45.5905	P2RY12;PDGFRA;CMA1;ALOX15;GATA6;CXCR4;F2;PTGS2;SELE;RELA;FGR;CYLD;CASP8;CASP1;PPEF1;JAK2;MGLL
GO_Biological_Process_2021	isoprenoid biosynthetic process (GO:0008299)	8.45462e-06	0.000162608	0	0	32.024	374.065	IDI1;IDI2;PDSS1;MVD;HMGCR
GO_Biological_Process_2021	negative regulation of lipid localization (GO:1905953)	8.45462e-06	0.000162608	0	0	32.024	374.065	NFKBIA;IL6;NR1H2;TNF;PTPN2
GO_Biological_Process_2021	regulation of cell cycle (GO:0051726)	8.54161e-06	0.000163487	0	0	2.72331	31.7825	RB1;CXCL8;HPGD;GMNN;GATA6;GATA3;BRCA1;TGM1;CCNB2;CCND1;CHEK1;HRAS;NKX3-1;JUN;MAP2K1;TGFB1;CSNK2A1;CSNK2A2;PLK1;STAT3;MAPK12;RHOB;CYLD;PTPRC;CDK4;BIRC5;ATM;TP53
GO_Biological_Process_2021	regulation of NIK/NF-kappaB signaling (GO:1901222)	8.82422e-06	0.000168084	0	0	5.00795	58.2826	APP;ILK;TNF;RHOA;RELA;EGFR;NFKBIA;PPM1A;CYLD;PTP4A3;PPM1B;NLRP3;EZR
GO_Biological_Process_2021	response to lipopolysaccharide (GO:0032496)	9.38775e-06	0.000177963	0	0	3.51789	40.7235	IL10;CXCL8;NOS2;NOS3;SERPINE1;HMGB1;CXCL13;MAPK14;SELE;CXCL2;NFKB1;RHOA;RELA;IL6;MAPKAPK2;CASP1;NLRP3;CTSG;JAK2
GO_Biological_Process_2021	positive regulation of protein-containing complex assembly (GO:0031334)	9.47396e-06	0.000178742	0	0	4.05766	46.9348	GSK3B;CSF2;TGFB1;SYK;PARP1;SRC;CXCL13;TNF;ESR1;VEGFA;RAP1B;ERCC1;BAX;ATM;TP53;SKAP1
GO_Biological_Process_2021	isopentenyl diphosphate biosynthetic process (GO:0009240)	9.82473e-06	0.000184482	0	0	102.356	1180.23	IDI1;IDI2;PMVK;MVD
GO_Biological_Process_2021	activation of cysteine-type endopeptidase activity involved in apoptotic process (GO:0006919)	1.01524e-05	0.000189736	0	0	4.93405	56.7307	TRAF2;TNF;F3;CASP8;LCK;CASP1;BAX;CYCS;PPARG;MAPT;JAK2;BOK;NKX3-1
GO_Biological_Process_2021	acetyl-CoA metabolic process (GO:0006084)	1.06812e-05	0.000195018	0	0	17.0978	195.719	ACLY;HMGCS1;PMVK;MVD;HMGCS2;ACACB
GO_Biological_Process_2021	engulfment of apoptotic cell (GO:0043652)	1.06812e-05	0.000195018	0	0	17.0978	195.719	RHOG;RAC2;RHOH;RAC1;RHOBTB1;RHOBTB2
GO_Biological_Process_2021	macrophage differentiation (GO:0030225)	1.06812e-05	0.000195018	0	0	17.0978	195.719	CDC42;CSF2;CASP8;PARP1;MMP9;VEGFA
GO_Biological_Process_2021	microvillus assembly (GO:0030033)	1.06812e-05	0.000195018	0	0	17.0978	195.719	RAP2C;RAP1B;RAP2A;RAP2B;RAP1A;EZR
GO_Biological_Process_2021	nitric oxide biosynthetic process (GO:0006809)	1.06812e-05	0.000195018	0	0	17.0978	195.719	NQO1;ARG2;NOS2;NOS3;AKT1;CYP1B1
GO_Biological_Process_2021	regulation of platelet activation (GO:0010543)	1.11243e-05	0.000202176	0	0	11.9807	136.656	LYN;PDGFRA;CELA2A;SYK;NOS3;PRKCA;F2
GO_Biological_Process_2021	cytoskeleton organization (GO:0007010)	1.17739e-05	0.000213006	0	0	3.97921	45.1625	RHOBTB3;RHOG;RHOH;RHOF;RND2;RND3;RHOD;RHOBTB1;RHOA;RHOBTB2;RND1;RHOB;RAC2;RAC3;RHOU;RAC1
GO_Biological_Process_2021	negative regulation of cell differentiation (GO:0045596)	1.1981e-05	0.000215766	0	0	3.20571	36.3278	RB1;CETP;TGFB1;NR1H2;ADIPOQ;HPN;NOG;PTEN;TWIST1;PTPN11;GATA3;GATA2;TNF;FOXO1;EGFR;NFKBIA;PPP2CA;IL6;SPRED1;PPARG;PPARA
GO_Biological_Process_2021	positive regulation of peptidyl-tyrosine phosphorylation (GO:0050731)	1.24049e-05	0.00022239	0	0	3.76067	42.4859	LYN;PTPN1;ANGPT4;CSF2;TGFB1;ANGPT1;SRC;HGF;STAT3;PTPN11;TNF;GATA1;VEGFA;IL6;PTPRC;JAK2;TP53
GO_Biological_Process_2021	long-chain fatty acid metabolic process (GO:0001676)	1.33463e-05	0.000238189	0	0	4.79258	53.7932	GPX1;HPGD;EPHX2;ALOX15;EPHX1;CYP3A4;PTGS2;CYP2C9;CYP2D6;CYP1A2;CYP1A1;CYP1B1;MGLL
GO_Biological_Process_2021	regulation of vesicle-mediated transport (GO:0060627)	1.45946e-05	0.000255149	0	0	4.40911	49.0948	PTPN1;MBTPS1;MAP2K1;RALA;SYK;SRC;LRRK2;RAB11A;RAB11B;FGR;PTPRC;RIT2;RAB25;MAPK1
GO_Biological_Process_2021	negative regulation of transcription by RNA polymerase II (GO:0000122)	1.46101e-05	0.000255149	0	0	2.03108	22.6136	RB1;THRB;EHMT2;RORC;HMGB1;NR3C1;TNF;IKZF5;SDR16C5;CCND1;TRPS1;SAP130;PARP1;EED;USP2;NOG;MITF;AR;PPM1A;DDIT3;PPARG;PPARA;EZR;TP53;PPARD;CBFB;HDAC1;TMPRSS6;NR1I2;GATA6;TWIST1;GATA3;GATA1;RELA;DNAJB1;RXRA;ELANE;JUN;VDR;NR1H2;PLK1;STAT3;NR1H4;ESR1;NFKB1;ESR2;VEGFA;ZGLP1;ID4
GO_Biological_Process_2021	steroid hormone biosynthetic process (GO:0120178)	1.46235e-05	0.000255149	0	0	8.93792	99.5048	HSD17B1;HSD17B2;FDX1;AKR1B1;HSD17B14;HSD17B11;HSD17B8;CYP19A1
GO_Biological_Process_2021	negative regulation of ERK1 and ERK2 cascade (GO:0070373)	1.46273e-05	0.000255149	0	0	6.43566	71.6457	LYN;PTPN1;SPRED1;DUSP3;PTPRC;ADIPOQ;PTEN;PIN1;EZR;PTPN2
GO_Biological_Process_2021	regulation of cellular component movement (GO:0051270)	1.46273e-05	0.000255149	0	0	6.43566	71.6457	LYN;ROCK1;ROCK2;EGF;ERBB2;PKN1;RAF1;RHOA;EGFR;VEGFA
GO_Biological_Process_2021	double-strand break repair (GO:0006302)	1.4683e-05	0.000255149	0	0	3.3957	37.7901	DCLRE1A;KDM4A;BLM;FEN1;DCLRE1C;PARP1;MCM9;RECQL;XRCC1;HMGB1;BRCA1;POLB;MORF4L1;PPP5C;RAD51;TDP1;ERCC1;ATM;POLL
GO_Biological_Process_2021	negative regulation of extrinsic apoptotic signaling pathway in absence of ligand (GO:2001240)	1.5471e-05	0.000265352	0	0	11.2313	124.404	CSF2;BCL2;AKT1;TNF;GATA1;BCL2L1;MCL1
GO_Biological_Process_2021	negative regulation of signal transduction in absence of ligand (GO:1901099)	1.5471e-05	0.000265352	0	0	11.2313	124.404	CSF2;BCL2;AKT1;TNF;GATA1;BCL2L1;MCL1
GO_Biological_Process_2021	regulation of steroid metabolic process (GO:0019218)	1.5471e-05	0.000265352	0	0	11.2313	124.404	NR5A1;UGT1A1;EPHX2;NR1H4;RORC;FMO5;UGT1A8
GO_Biological_Process_2021	omega-hydroxylase P450 pathway (GO:0097267)	1.6382e-05	0.000278564	0	0	25.6178	282.291	CYP2C9;CYP1A2;CYP1A1;CYP1B1;CYP2C19
GO_Biological_Process_2021	Rap protein signal transduction (GO:0032486)	1.6382e-05	0.000278564	0	0	25.6178	282.291	RAP2C;RAP1B;RAP2A;RAP2B;RAP1A
GO_Biological_Process_2021	nitric oxide metabolic process (GO:0046209)	1.65438e-05	0.000278921	0	0	15.3872	169.405	NQO1;ARG2;NOS2;NOS3;AKT1;CYP1B1
GO_Biological_Process_2021	regulation of amyloid-beta clearance (GO:1900221)	1.65438e-05	0.000278921	0	0	15.3872	169.405	ROCK1;LRP1;HDAC1;CYP51A1;HMGCR;TNF
GO_Biological_Process_2021	positive regulation of cell differentiation (GO:0045597)	1.70353e-05	0.00028599	0	0	2.79043	30.6396	CSF2;GATA5;TWIST1;INS;CDC42;MAPK9;RAP1A;RRAS;RPS6KA1;AKT1;TGFB1;ATP6AP1;HGF;MAPK14;RHOA;NFKB1;MAPK12;AR;NUDT21;MAPK11;IL6;CTNNB1;PPARG;PRKD1;PPARD
GO_Biological_Process_2021	negative regulation of kinase activity (GO:0033673)	1.82954e-05	0.000304564	0	0	5.5566	60.6162	RB1;SPRED1;PTPRC;PDPK1;HSPB1;PRKAG2;AKT1;MAPT;TAB1;PPM1E;PPM1F
GO_Biological_Process_2021	positive regulation of interleukin-1 production (GO:0032732)	1.82954e-05	0.000304564	0	0	5.5566	60.6162	APP;IL6;CASP8;STAT3;CASP1;HSPB1;NLRP3;HMGB1;AZU1;JAK2;TNF
GO_Biological_Process_2021	regulation of cellular biosynthetic process (GO:0031326)	1.88558e-05	0.000311278	0	0	8.56506	93.1767	CXCL8;PRKAA2;ADIPOQ;NR1H4;PRKAG2;MITF;RAC1;JAK2
GO_Biological_Process_2021	regulation of chemotaxis (GO:0050920)	1.88558e-05	0.000311278	0	0	8.56506	93.1767	P2RY12;PDGFRA;TGFB1;DUSP3;CXCR4;PPM1F;ELANE;PTPN2
GO_Biological_Process_2021	transcription initiation from RNA polymerase II promoter (GO:0006367)	2.21805e-05	0.000363579	0	0	3.5761	38.3226	THRB;VDR;HDAC1;NR1H2;NR1I2;RORC;NR1H4;NR3C1;ESR1;ESR2;NR5A1;AR;RXRA;NPPA;PPARG;PPARA;PPARD
GO_Biological_Process_2021	inflammatory response (GO:0006954)	2.22075e-05	0.000363579	0	0	2.88571	30.9206	PTGIR;TGFB1;CXCL8;NOS2;CCL20;STAT3;ALOX15;HP;CXCR4;HPR;AZU1;HMGB1;CXCL13;TNF;SELE;CXCL2;RELA;NFKB1;IL6;MAPKAPK2;NLRP3;RAC1;MGLL
GO_Biological_Process_2021	cellular protein localization (GO:0034613)	2.26954e-05	0.000370038	0	0	2.51892	26.9357	ARF3;ARF4;ARF1;STXBP3;ARL6;STXBP1;LRRK2;STXBP2;ARL1;DNAJC27;EGFR;ARL17A;ARL5B;ARL5C;ARL5A;TRIM23;ARL11;ARL14;ANGPT1;RABL2A;RABL2B;TBC1D2B;ARL4C;ARL4D;RAP2A;ARL4A;TBC1D2;RAB14;CTNNB1
GO_Biological_Process_2021	positive regulation of cellular catabolic process (GO:0031331)	2.43508e-05	0.000395401	0	0	3.54708	37.6804	APP;GSK3B;PTPN1;PRKAA2;ROCK1;LRRK2;PRKCD;TWIST1;HMGB1;TNF;HIF1A;FOXO1;INS;DHRSX;PRKD1;EZR;PPARA
GO_Biological_Process_2021	regulation of leukocyte migration (GO:0002685)	2.47512e-05	0.000398826	0	0	13.9876	148.362	RHOG;RAC2;RHOH;HMOX1;RAC1;VEGFA
GO_Biological_Process_2021	negative regulation of intrinsic apoptotic signaling pathway (GO:2001243)	2.49897e-05	0.000398826	0	0	5.34636	56.6556	BAG5;SRC;LRRK2;BCL2;HSPB1;AKT1;MMP9;INS;MCL1;NFE2L2;BCL2L1
GO_Biological_Process_2021	regulation of transcription initiation from RNA polymerase II promoter (GO:0060260)	2.49897e-05	0.000398826	0	0	5.34636	56.6556	IL6;CCND1;CBFB;CDK4;PTEN;BAX;CTNNB1;PPM1D;TP53;RELA;NFKB1
GO_Biological_Process_2021	negative regulation of cysteine-type endopeptidase activity (GO:2000117)	2.5065e-05	0.000398826	0	0	5.98572	63.413	YWHAE;GPX1;CSNK2A1;SRC;HGF;RPS6KA1;AKT1;RAF1;TNF;VEGFA
GO_Biological_Process_2021	positive regulation of chemokine production (GO:0032722)	2.5065e-05	0.000398826	0	0	5.98572	63.413	APP;IL6;SYK;ADIPOQ;TWIST1;HMOX1;HMGB1;AZU1;TNF;HIF1A
GO_Biological_Process_2021	negative regulation of binding (GO:0051100)	2.54694e-05	0.000403639	0	0	4.47191	47.304	GSK3B;JUN;RALB;ROCK1;LRRK2;GZMA;PRKCD;NFKBIA;CYP2D6;AKT1;BAX;PIN1;JAK2
GO_Biological_Process_2021	positive regulation of protein localization to membrane (GO:1905477)	2.62864e-05	0.000414927	0	0	4.15463	43.8166	YWHAE;LRP1;PDPK1;RHOG;GZMB;TNF;EGFR;CASP8;PPP3CC;ERBB2;BCL2;AKT1;TP53;HRAS
GO_Biological_Process_2021	positive regulation of vascular endothelial growth factor production (GO:0010575)	2.83958e-05	0.000446446	0	0	9.98235	104.508	IL6;TGFB1;CYP1B1;GATA4;BRCA1;PTGS2;HIF1A
GO_Biological_Process_2021	regulation of endothelial cell migration (GO:0010594)	2.88097e-05	0.000449854	0	0	4.41284	46.1353	ANGPT4;ANGPT1;ROCK2;EGF;PRKCA;GATA3;RHOB;VEGFA;RRAS;RHOJ;AKT1;RAC1;PRKD1
GO_Biological_Process_2021	positive regulation of ERK1 and ERK2 cascade (GO:0070374)	2.88397e-05	0.000449854	0	0	3.21679	33.6276	APP;PDGFRA;MAP2K1;TGFB1;ATP6AP1;ANGPT1;CCL20;ALOX15;PRKCA;GATA4;PTPN11;HMGB1;TNF;EGFR;ICAM1;RAP1A;PTPRC;THPO;HRAS
GO_Biological_Process_2021	positive regulation of integrin activation (GO:0033625)	2.9098e-05	0.000450337	0	0	21.3471	222.967	P2RY12;RAP1B;SRC;CXCL13;SKAP1
GO_Biological_Process_2021	positive regulation of production of miRNAs involved in gene silencing by miRNA (GO:1903800)	2.9098e-05	0.000450337	0	0	21.3471	222.967	IL6;MAP2K1;TGFB1;TP53;EGFR
GO_Biological_Process_2021	calcium-mediated signaling (GO:0019722)	2.94261e-05	0.000450984	0	0	4.1072	42.853	P2RY12;CXCL8;PDPK1;CCL20;LRRK2;CXCR4;AZU1;SELE;EGFR;PPP3CA;PPP3CB;PTPRC;PPP3CC;FKBP1B
GO_Biological_Process_2021	cellular response to insulin stimulus (GO:0032869)	2.94813e-05	0.000450984	0	0	3.66056	38.1861	GRB7;GSK3B;ATP6AP1;PARP1;PDPK1;PLA2G1B;ADIPOQ;SLC2A4;FOXO1;INS;RPS6KB1;NAMPT;AKT1;PPARG;RHOQ;PTPN2
GO_Biological_Process_2021	positive regulation of macromolecule biosynthetic process (GO:0010557)	2.94813e-05	0.000450984	0	0	3.66056	38.1861	PCNA;ATAD5;EGF;HGF;AZU1;LARP6;NFKB1;EGFR;INS;AR;IL6;RPS6KB1;NAMPT;ERBB2;AKT1;JAK2
GO_Biological_Process_2021	regulation of cell adhesion mediated by integrin (GO:0033628)	3.04405e-05	0.000463485	0	0	7.90539	82.214	LYN;P2RY12;SYK;PLAU;SERPINE1;RAC3;CYP1B1;PTPN11
GO_Biological_Process_2021	protein transport (GO:0015031)	3.05325e-05	0.000463485	0	0	2.3917	24.8658	ARF3;MACF1;ARF4;ARF1;STXBP3;LRP1;ARL6;STXBP1;STXBP2;ARL1;DNAJC27;ARL17A;ARL5B;ARL5C;ARL5A;TRIM23;ARL11;ARL14;ATP6AP1;RABL2A;RABL2B;TBC1D2B;RAB11B;ARL4C;ARL4D;ARL4A;TBC1D2;RAB14;CANX;TXNIP;PPARG
GO_Biological_Process_2021	regulation of protein-containing complex assembly (GO:0043254)	3.16918e-05	0.000479248	0	0	3.83673	39.7465	RB1;GSK3B;TGFB1;RALB;SYK;SRC;STXBP1;TRAF2;PTPN11;TNF;MAPK15;VEGFA;CDC42;BAX;RAF1
GO_Biological_Process_2021	positive regulation of biosynthetic process (GO:0009891)	3.24337e-05	0.000486752	0	0	6.61239	68.3477	CXCL8;TGFB1;SIRT4;AKT1;HSD17B13;F2;PPARA;LARP6;INS
GO_Biological_Process_2021	regulation of endothelial cell apoptotic process (GO:2000351)	3.24337e-05	0.000486752	0	0	6.61239	68.3477	IL10;ANGPT1;PDPK1;SERPINE1;GATA3;GATA2;TNF;ICAM1;NFE2L2
GO_Biological_Process_2021	interleukin-6-mediated signaling pathway (GO:0070102)	3.5942e-05	0.000535346	0	0	12.8213	131.208	IL6;SRC;STAT3;PTPN11;JAK2;JAK1
GO_Biological_Process_2021	positive regulation of cell migration involved in sprouting angiogenesis (GO:0090050)	3.5942e-05	0.000535346	0	0	12.8213	131.208	MAP3K3;RHOJ;HMOX1;GATA2;PTGS2;VEGFA
GO_Biological_Process_2021	cellular response to drug (GO:0035690)	3.75958e-05	0.000557882	0	0	9.45647	96.3484	KCNH2;RAP2A;ADIPOQ;PPM1E;TP53;PPM1F;NKX3-1
GO_Biological_Process_2021	positive regulation of establishment of protein localization to mitochondrion (GO:1903749)	4.13229e-05	0.000606375	0	0	5.59447	56.4712	YWHAE;CASP8;PPP3CC;CSNK2A2;RAC2;BCL2;GZMB;RHOU;SAE1;TP53
GO_Biological_Process_2021	positive regulation of interleukin-1 beta production (GO:0032731)	4.13229e-05	0.000606375	0	0	5.59447	56.4712	APP;IL6;CASP8;STAT3;CASP1;HSPB1;NLRP3;AZU1;JAK2;TNF
GO_Biological_Process_2021	Rho protein signal transduction (GO:0007266)	4.13229e-05	0.000606375	0	0	5.59447	56.4712	CDC42;ROCK1;ROCK2;RHOJ;RHOG;RHOU;RHOV;RHOD;RHOA;RHOB
GO_Biological_Process_2021	positive regulation of smooth muscle cell proliferation (GO:0048661)	4.71105e-05	0.000688751	0	0	6.25431	62.3118	IL10;JUN;IL6;MMP2;AKT1;HMOX1;TNF;MMP9;ELANE
GO_Biological_Process_2021	negative regulation of production of miRNAs involved in gene silencing by miRNA (GO:1903799)	4.83296e-05	0.000700392	0	0	18.2966	181.821	IL6;TGFB1;STAT3;TNF;ESR1
GO_Biological_Process_2021	sphingoid metabolic process (GO:0046519)	4.83296e-05	0.000700392	0	0	18.2966	181.821	PLPP3;SGPP2;PLPP2;SGPP1;PLPP1
GO_Biological_Process_2021	regulation of reactive oxygen species metabolic process (GO:2000377)	4.8437e-05	0.000700392	0	0	5.47516	54.397	ARF4;CBR1;RAC2;CYP1B1;BRCA1;RAC1;F2;MAPK14;TP53;DHRS4
GO_Biological_Process_2021	regulation of vascular endothelial growth factor production (GO:0010574)	4.91072e-05	0.000707501	0	0	8.98318	89.1266	IL6;TGFB1;CYP1B1;GATA4;BRCA1;PTGS2;HIF1A
GO_Biological_Process_2021	epoxygenase P450 pathway (GO:0019373)	5.08554e-05	0.000724781	0	0	11.8345	117.002	CYP2C9;EPHX2;CYP1A2;CYP1A1;CYP1B1;CYP2C19
GO_Biological_Process_2021	negative regulation of oxidative stress-induced intrinsic apoptotic signaling pathway (GO:1902176)	5.08554e-05	0.000724781	0	0	11.8345	117.002	BAG5;HSPB1;AKT1;HIF1A;INS;NFE2L2
GO_Biological_Process_2021	Rac protein signal transduction (GO:0016601)	5.08554e-05	0.000724781	0	0	11.8345	117.002	NCKAP1;RHOG;RAC2;RHOH;RAC1;HACD3
GO_Biological_Process_2021	negative regulation of cellular catabolic process (GO:0031330)	5.16326e-05	0.000730601	0	0	4.88419	48.2136	IL10;KDM4A;ROCK1;HGF;STAT3;HP;BCL2;AKT1;MET;INS;MCL1
GO_Biological_Process_2021	peptidyl-tyrosine phosphorylation (GO:0018108)	5.16326e-05	0.000730601	0	0	4.88419	48.2136	FGR;LYN;PDGFRA;SYK;LCK;SRC;ERBB2;DYRK1A;PTPN6;JAK2;EGFR
GO_Biological_Process_2021	negative regulation of MAPK cascade (GO:0043409)	5.19036e-05	0.000731823	0	0	4.13936	40.8394	LYN;PTPN1;DUSP3;ADIPOQ;PRKCD;PTEN;FOXO1;SPRED1;PTPRC;PIN1;EZR;PPEF2;PTPN2
GO_Biological_Process_2021	positive regulation of cellular biosynthetic process (GO:0031328)	5.41141e-05	0.000760284	0	0	3.05567	30.0202	CXCL8;PCNA;ATAD5;EGF;HGF;NR1H2;PTH1R;PTGS2;TNF;HIF1A;LARP6;EGFR;INS;IL6;RPS6KB1;SP1;ERBB2;AKT1;PTPN2
GO_Biological_Process_2021	DNA replication (GO:0006260)	5.61305e-05	0.000785827	0	0	3.84384	37.6228	BLM;FEN1;MCM7;MCM9;REV1;BRCA1;POLB;CDC45;CHEK1;CDK2;ATM;POLL;TOP1;MCM2
GO_Biological_Process_2021	positive regulation of protein binding (GO:0032092)	5.65691e-05	0.000789178	0	0	5.36081	52.429	PPP2CA;FKBP1A;APP;GSK3B;PPP2CB;RALB;LRP1;LRRK2;PIN1;MMP9
GO_Biological_Process_2021	regulation of intracellular steroid hormone receptor signaling pathway (GO:0033143)	5.85525e-05	0.000813983	0	0	7.08648	69.0619	AR;CBFB;GPAM;SAFB2;KLK3;KLK2;PKN1;ESR1
GO_Biological_Process_2021	negative regulation of oxidative stress-induced cell death (GO:1903202)	6.33527e-05	0.00087154	0	0	8.55496	82.699	BAG5;LRRK2;HSPB1;AKT1;GATA4;INS;NFE2L2
GO_Biological_Process_2021	positive regulation of monooxygenase activity (GO:0032770)	6.33527e-05	0.00087154	0	0	8.55496	82.699	DHFR;POR;VDR;AKT1;TNF;HIF1A;INS
GO_Biological_Process_2021	regulation of extrinsic apoptotic signaling pathway in absence of ligand (GO:2001239)	6.33527e-05	0.00087154	0	0	8.55496	82.699	CSF2;BCL2;AKT1;TNF;GATA1;MCL1;BCL2L1
GO_Biological_Process_2021	Cdc42 protein signal transduction (GO:0032488)	6.47059e-05	0.000880979	0	0	34.1152	329.064	CDC42;RHOJ;RHOU;RHOV
GO_Biological_Process_2021	response to lead ion (GO:0010288)	6.47059e-05	0.000880979	0	0	34.1152	329.064	PPP2CA;PPP2CB;PPP5C;MAPT
GO_Biological_Process_2021	T-helper 17 cell differentiation (GO:0072539)	6.47059e-05	0.000880979	0	0	34.1152	329.064	IL6;STAT3;RORC;BATF
GO_Biological_Process_2021	negative regulation of autophagy (GO:0010507)	6.58347e-05	0.000893277	0	0	5.25114	50.5598	IL10;KDM4A;PIK3CA;LRRK2;HGF;STAT3;BCL2;AKT1;MET;MCL1
GO_Biological_Process_2021	Fc-gamma receptor signaling pathway involved in phagocytosis (GO:0038096)	6.76885e-05	0.000915297	0	0	4.72089	45.3234	FGR;CDC42;LYN;NCKAP1;PLPP4;SYK;PIK3CA;SRC;PRKCD;MAPK1;RAC1
GO_Biological_Process_2021	positive regulation of nitrogen compound metabolic process (GO:0051173)	7.03354e-05	0.000947853	0	0	10.9886	105.075	APP;EGF;HPN;GATA3;TNF;NFKB1
GO_Biological_Process_2021	double-strand break repair via homologous recombination (GO:0000724)	7.23922e-05	0.000972264	0	0	3.9909	38.0469	BLM;FEN1;MCM7;PARP1;MCM9;RECQL;XRCC1;BRCA1;MORF4L1;CDC45;RAD51;POLL;MCM2
GO_Biological_Process_2021	positive regulation of protein kinase activity (GO:0045860)	7.54678e-05	0.00099686	0	0	3.20831	30.4527	PTPN1;MAP2K1;RALB;SRC;PRKCD;PRKAG1;PRKAG2;AZU1;TNF;RHOA;VEGFA;PPP2CA;RAP1A;PTPRC;TAOK3;MAPRE3;CALM2
GO_Biological_Process_2021	regulation of protein serine/threonine kinase activity (GO:0071900)	7.60847e-05	0.00099686	0	0	3.72437	35.3207	RB1;DIRAS3;MAP2K1;BLM;RALB;SRC;MST1;RHOA;PPP2CA;CCNB2;CCND1;AKT1;PPEF2;CALM2
GO_Biological_Process_2021	negative regulation of hydrogen peroxide-induced cell death (GO:1903206)	7.60932e-05	0.00099686	0	0	16.0087	151.819	IL10;HGF;LRRK2;MET;NFE2L2
GO_Biological_Process_2021	negative regulation of locomotion (GO:0040013)	7.60932e-05	0.00099686	0	0	16.0087	151.819	DUSP3;PIN1;GATA3;PTPN2;ELANE
GO_Biological_Process_2021	regulation of homotypic cell-cell adhesion (GO:0034110)	7.60932e-05	0.00099686	0	0	16.0087	151.819	LYN;CELA2A;SYK;PRKCA;JAK1
GO_Biological_Process_2021	platelet degranulation (GO:0002576)	7.62364e-05	0.00099686	0	0	3.52116	33.3865	CFD;LYN;APP;TGFB1;EGF;HGF;STXBP1;SERPINE1;STXBP2;FN1;F13A1;PLG;F5;VEGFA;F8
GO_Biological_Process_2021	regulation of phosphorylation (GO:0042325)	7.62364e-05	0.00099686	0	0	3.52116	33.3865	LYN;APP;MCM7;ROCK1;EGF;FN1;PRKAG1;ILK;HSPB1;PRKAG2;HIF1A;EGFR;PPP2CA;AR;PIN1
GO_Biological_Process_2021	regulation of protein secretion (GO:0050708)	7.62364e-05	0.00099686	0	0	3.52116	33.3865	CELA2A;TGFB1;NOS2;PLA2G1B;CYP51A1;ITPR1;PRKCA;HMGCR;TNF;INS;IL6;PPP3CB;RAP1A;EZR;RAPGEF4
GO_Biological_Process_2021	Fc-gamma receptor signaling pathway (GO:0038094)	7.72046e-05	0.0010062	0	0	4.64326	43.9673	FGR;CDC42;LYN;NCKAP1;PLPP4;SYK;PIK3CA;SRC;PRKCD;MAPK1;RAC1
GO_Biological_Process_2021	positive regulation of reactive oxygen species metabolic process (GO:2000379)	7.93906e-05	0.00102793	0	0	5.78434	54.6107	CBR1;TGFB1;SYK;PRKCD;MAPT;F2;MAPK14;TP53;DHRS4
GO_Biological_Process_2021	regulation of stress-activated MAPK cascade (GO:0032872)	7.93906e-05	0.00102793	0	0	5.78434	54.6107	MAP2K1;RAP2A;PHLPP1;COPS5;TAOK3;MAPK1;EGFR;FOXO1;KLHDC10
GO_Biological_Process_2021	intracellular protein transport (GO:0006886)	8.39045e-05	0.00108283	0	0	2.36464	22.1941	ARF3;ARF4;ARF1;STXBP3;ARL6;STXBP1;STXBP2;ARL1;DNAJC27;ARL17A;ARL5B;ARL5C;AKT1;ARL5A;TRIM23;ARL11;TGFB1;ARL14;SYK;STAT3;RABL2A;RABL2B;TBC1D2B;ARL4C;ARL4D;ARL4A;TBC1D2;RAB14
GO_Biological_Process_2021	regulation of cellular component biogenesis (GO:0044087)	8.72782e-05	0.00111908	0	0	6.6286	61.9536	RAP1B;RAP1A;BAG5;ROCK1;ROCK2;PTPN11;TRAF2;EZR
GO_Biological_Process_2021	regulation of nitric-oxide synthase activity (GO:0050999)	8.72782e-05	0.00111908	0	0	6.6286	61.9536	DHFR;NOS3;AKT1;TNF;HIF1A;GLA;EGFR;INS
GO_Biological_Process_2021	regulation of small GTPase mediated signal transduction (GO:0051056)	8.76051e-05	0.00111965	0	0	3.30707	30.8969	SRC;RHOG;RHOH;RHOF;RHOD;RHOA;RHOB;CDC42;RHOJ;RAC2;RAC3;RHOU;RAC1;RHOV;RHOQ;TGM2
GO_Biological_Process_2021	response to interleukin-1 (GO:0070555)	9.16138e-05	0.00116712	0	0	4.17829	38.8495	APP;MAPK11;CXCL8;SRC;CCL20;PRKCA;HIF1A;SELE;RELA;NFKB1;NKX3-1;MAPK13
GO_Biological_Process_2021	cobalamin metabolic process (GO:0009235)	9.53338e-05	0.00120291	0	0	10.2555	94.9464	PRSS1;MTRR;CTRB2;CTRB1;PRSS3;CTRC
GO_Biological_Process_2021	purinergic nucleotide receptor signaling pathway (GO:0035590)	9.53338e-05	0.00120291	0	0	10.2555	94.9464	APP;NT5E;CASP1;TXNIP;NLRP3;CTSG
GO_Biological_Process_2021	regulation of cell-substrate junction assembly (GO:0090109)	9.53338e-05	0.00120291	0	0	10.2555	94.9464	MACF1;DUSP3;ROCK1;ROCK2;PTPRA;RHOA
GO_Biological_Process_2021	Fc receptor mediated stimulatory signaling pathway (GO:0002431)	9.9708e-05	0.0012541	0	0	4.49539	41.4172	FGR;CDC42;LYN;NCKAP1;PLPP4;SYK;PIK3CA;SRC;PRKCD;MAPK1;RAC1
GO_Biological_Process_2021	positive regulation of cysteine-type endopeptidase activity (GO:2001056)	0.000101736	0.00126661	0	0	4.94741	45.4822	CASP8;SYK;CASP1;NLRP3;CYCS;HMGB1;TNF;CTSD;PPM1F;NKX3-1
GO_Biological_Process_2021	negative regulation of cell motility (GO:2000146)	0.00010195	0.00126661	0	0	3.61208	33.1987	DUSP3;SERPINE1;ADIPOQ;NOG;PTEN;MITF;GATA3;MAPK15;RHOB;RAP2C;RAP2A;RAP2B;CYP1B1;PIN1
GO_Biological_Process_2021	positive regulation of kinase activity (GO:0033674)	0.00010195	0.00126661	0	0	3.61208	33.1987	PDGFRA;MUSK;PRKAG1;PRKAG2;AZU1;F2;TNF;EGFR;RAP1A;PTPRC;ERBB2;MAPRE3;MAPT;MET
GO_Biological_Process_2021	positive regulation of phosphate metabolic process (GO:0045937)	0.000101981	0.00126661	0	0	7.81024	71.7817	APP;AR;SRC;EGF;ILK;PTH1R;EGFR
GO_Biological_Process_2021	negative regulation of I-kappaB kinase/NF-kappaB signaling (GO:0043124)	0.000105517	0.00130237	0	0	6.42112	58.7959	PPM1A;PPM1B;CASP8;PPM1N;ADIPOQ;NR1H4;RHOH;ESR1
GO_Biological_Process_2021	positive regulation of intrinsic apoptotic signaling pathway (GO:2001244)	0.000105517	0.00130237	0	0	6.42112	58.7959	LCK;DDIT3;BCL2;BAX;TP53;NKX3-1;BOK;BCL2L1
GO_Biological_Process_2021	intrinsic apoptotic signaling pathway in response to DNA damage (GO:0008630)	0.000109898	0.00135222	0	0	5.50832	50.2136	BCL2A1;BCL2;BAX;ATM;BRCA1;TP53;BOK;MCL1;BCL2L1
GO_Biological_Process_2021	cellular response to lectin (GO:1990858)	0.000112121	0.00136684	0	0	3.57613	32.5282	LYN;SYK;PDPK1;SRC;PRKCD;NFKB1;RELA;NRAS;RPS6KA5;PRKACG;KRAS;TAB1;RAF1;HRAS
GO_Biological_Process_2021	cellular response to molecule of bacterial origin (GO:0071219)	0.000112121	0.00136684	0	0	3.57613	32.5282	IL10;CXCL8;SERPINE1;HMGB1;CXCL13;MAPK14;CXCL2;NFKB1;RHOA;RELA;IL6;CASP1;NLRP3;CTSG
GO_Biological_Process_2021	stimulatory C-type lectin receptor signaling pathway (GO:0002223)	0.000112121	0.00136684	0	0	3.57613	32.5282	LYN;SYK;PDPK1;SRC;PRKCD;NFKB1;RELA;NRAS;RPS6KA5;PRKACG;KRAS;TAB1;RAF1;HRAS
GO_Biological_Process_2021	response to UV-A (GO:0070141)	0.00011469	0.0013896	0	0	14.2292	129.105	CCND1;MMP2;AKT1;MMP9;EGFR
GO_Biological_Process_2021	steroid catabolic process (GO:0006706)	0.00011469	0.0013896	0	0	14.2292	129.105	CYP1A2;HSD17B14;CYP3A4;HSD17B11;CYP19A1
GO_Biological_Process_2021	isoprenoid metabolic process (GO:0006720)	0.000125534	0.00149651	0	0	25.5851	229.829	IDI2;PDSS1;MVD;HMGCR
GO_Biological_Process_2021	regulation of endodeoxyribonuclease activity (GO:0032071)	0.000125534	0.00149651	0	0	25.5851	229.829	GZMA;PRKCD;AKT1;HMGB1
GO_Biological_Process_2021	regulation of positive chemotaxis (GO:0050926)	0.000125534	0.00149651	0	0	25.5851	229.829	F7;ANGPT2;F3;VEGFA
GO_Biological_Process_2021	response to hydroperoxide (GO:0033194)	0.000125534	0.00149651	0	0	25.5851	229.829	SP1;PRKCD;XRCC1;PRKD1
GO_Biological_Process_2021	epithelial cell migration (GO:0010631)	0.000126797	0.00149651	0	0	6.22622	55.8674	PTP4A3;ROCK1;PIK3CA;NOS3;CYP1B1;PKN1;PRSS3;RHOA
GO_Biological_Process_2021	negative regulation of cell-cell adhesion (GO:0022408)	0.000126797	0.00149651	0	0	6.22622	55.8674	IL10;TGFB1;ADIPOQ;AKT1;PLG;PPARA;PPM1F;VEGFA
GO_Biological_Process_2021	exogenous drug catabolic process (GO:0042738)	0.000126913	0.00149651	0	0	9.614	86.2569	CYP2C9;CYP2D6;NR1I2;CYP1A2;CYP3A4;CYP2C19
GO_Biological_Process_2021	positive regulation of amyloid precursor protein catabolic process (GO:1902993)	0.000126913	0.00149651	0	0	9.614	86.2569	LYN;ROCK2;SP1;CASP3;TNF;RELA
GO_Biological_Process_2021	tetrapyrrole metabolic process (GO:0033013)	0.000126913	0.00149651	0	0	9.614	86.2569	PRSS1;MTRR;CTRB2;CTRB1;PRSS3;CTRC
GO_Biological_Process_2021	negative regulation of protein kinase activity (GO:0006469)	0.00014301	0.00168132	0	0	3.96319	35.0845	RB1;PTPN1;SPRED1;DUSP3;PTPRC;PDPK1;HSPB1;PRKAG2;AKT1;TAB1;PPM1E;PPM1F
GO_Biological_Process_2021	positive regulation of tumor necrosis factor production (GO:0032760)	0.000143843	0.00168611	0	0	4.29038	37.9561	APP;IL6;PTPRC;SYK;STAT3;HSPB1;TWIST1;PTPN11;HMGB1;AZU1;JAK2
GO_Biological_Process_2021	regulation of programmed cell death (GO:0043067)	0.000147648	0.00172561	0	0	2.80916	24.7787	PHLPP1;LRRK2;TRAF2;TNF;TP53I3;APEX1;CASP1;AKT1;BIRC5;BAX;ATM;PTPN6;NAE1;JAK2;SGK1;RAF1;TP53;BCL2L14;TGM2
GO_Biological_Process_2021	regulation of cellular catabolic process (GO:0031329)	0.000152972	0.00178257	0	0	4.67682	41.0871	ROCK1;LRRK2;DDIT3;ITPR1;KEAP1;HSPB1;ATM;MAPT;MAPK15;BOK
GO_Biological_Process_2021	positive regulation of intracellular protein transport (GO:0090316)	0.00015554	0.00180718	0	0	3.13055	27.4506	YWHAE;GSK3B;TGFB1;PRKCD;CSNK2A2;GZMB;CASP8;PPP3CC;ERBB2;BCL2;RAC2;RHOU;SAE1;TP53;EMD;HRAS
GO_Biological_Process_2021	ERBB2 signaling pathway (GO:0038128)	0.00015787	0.00181826	0	0	7.18467	62.8927	GRB7;PIK3CA;SRC;EGF;ERBB2;PRKCA;EGFR
GO_Biological_Process_2021	long-chain fatty acid transport (GO:0015909)	0.00015787	0.00181826	0	0	7.18467	62.8927	PRKAA2;RPS6KB1;PRKAG2;SPX;PPARG;SLC25A20;ACACB
GO_Biological_Process_2021	regulation of cell migration involved in sprouting angiogenesis (GO:0090049)	0.00015787	0.00181826	0	0	7.18467	62.8927	MAP3K3;RHOJ;HMOX1;GATA2;PTGS2;RHOA;VEGFA
GO_Biological_Process_2021	innate immune response activating cell surface receptor signaling pathway (GO:0002220)	0.000162115	0.00186174	0	0	3.43917	30.0144	LYN;SYK;PDPK1;SRC;PRKCD;NFKB1;RELA;NRAS;RPS6KA5;PRKACG;KRAS;TAB1;RAF1;HRAS
GO_Biological_Process_2021	drug catabolic process (GO:0042737)	0.000166245	0.0018816	0	0	9.048	78.7361	CYP2C9;CYP2D6;NR1I2;CYP1A2;CYP3A4;CYP2C19
GO_Biological_Process_2021	negative regulation of phosphoprotein phosphatase activity (GO:0032515)	0.000166245	0.0018816	0	0	9.048	78.7361	FKBP1A;GSK3B;ROCK1;ROCK2;FKBP1B;TNF
GO_Biological_Process_2021	positive regulation of cholesterol efflux (GO:0010875)	0.000166245	0.0018816	0	0	9.048	78.7361	NFKBIA;RXRA;LRP1;NR1H2;ADIPOQ;PPARG
GO_Biological_Process_2021	fibrinolysis (GO:0042730)	0.000166694	0.0018816	0	0	12.8056	111.4	PLAU;SERPINE1;PLAT;PLG;F2
GO_Biological_Process_2021	steroid hormone mediated signaling pathway (GO:0043401)	0.000166694	0.0018816	0	0	12.8056	111.4	AR;NR3C1;ESR1;ESR2;PLPP1
GO_Biological_Process_2021	vitamin D metabolic process (GO:0042359)	0.000166694	0.0018816	0	0	12.8056	111.4	VDR;CYP1A1;UGT1A4;UGT1A3;CYP3A4
GO_Biological_Process_2021	regulation of humoral immune response (GO:0002920)	0.000173636	0.00195439	0	0	5.14029	44.5075	C1S;C9;CFI;GATA6;CXCL13;F2;C8A;CFB;C2
GO_Biological_Process_2021	regulation of cytokine production involved in inflammatory response (GO:1900015)	0.000180024	0.00202055	0	0	5.86982	50.6121	IL6;NOS2;STAT3;F2;MAPK14;PPARA;TNF;HIF1A
GO_Biological_Process_2021	regulation of cytokine production (GO:0001817)	0.000181903	0.00203588	0	0	3.0835	26.5552	LYN;IL10;NOS2;GATA3;MAPK14;TNF;INS;BATF;FGR;TWSG1;IL6;KAT2A;RPS6KA5;PTPRC;CASP8;MAPKAPK2
GO_Biological_Process_2021	negative regulation of nucleic acid-templated transcription (GO:1903507)	0.000193155	0.00214583	0	0	2.06041	17.6207	RB1;CSF2;HDAC1;TMPRSS6;FOXG1;NR1I2;GMNN;GATA6;TWIST1;GATA3;AHR;BRCA1;NR3C1;TNF;FOXO1;PPM1F;RELA;RPS6KA5;NKX3-1;KDM4A;JUN;TGFB1;VDR;EED;NR1H2;ADIPOQ;DDIT3;ID4;BIRC5;CTNNB1;PPARG;TP53;MPHOSPH8;PPARD
GO_Biological_Process_2021	negative regulation of cytokine production (GO:0001818)	0.000193406	0.00214583	0	0	2.8376	24.2635	IL10;FN1;NR1H4;HMGB1;F2;TNF;CYLD;TWSG1;IL6;RPS6KA5;PTPRC;DDIT3;PIN1;PTPN6;RAC1;EZR;PPARA;ELANE
GO_Biological_Process_2021	positive regulation of cholesterol transport (GO:0032376)	0.000193894	0.00214583	0	0	6.90798	59.0508	NFKBIA;CETP;RXRA;LRP1;NR1H2;ADIPOQ;PPARG
GO_Biological_Process_2021	regulation of cholesterol efflux (GO:0010874)	0.000193894	0.00214583	0	0	6.90798	59.0508	NFKBIA;CETP;RXRA;LRP1;NR1H2;ADIPOQ;PPARG
GO_Biological_Process_2021	regulation of fat cell differentiation (GO:0045598)	0.000203581	0.00224052	0	0	4.1032	34.8749	IL6;TGFB1;ADIPOQ;RORC;AKT1;PPARG;GATA3;GATA2;TNF;FOXO1;PPARD
GO_Biological_Process_2021	regulation of protein localization to plasma membrane (GO:1903076)	0.000203581	0.00224052	0	0	4.1032	34.8749	AR;TGFB1;LRP1;PDPK1;RHOG;AKT1;TNF;RHOQ;EGFR;INS;BCL2L1
GO_Biological_Process_2021	intracellular steroid hormone receptor signaling pathway (GO:0030518)	0.000212822	0.00233573	0	0	5.70648	48.2486	AR;SRC;NR3C1;SAFB;ESR1;ESR2;PLPP1;NKX3-1
GO_Biological_Process_2021	positive regulation of carbohydrate metabolic process (GO:0045913)	0.000214617	0.00233602	0	0	8.54489	72.1757	APP;PRKAA2;EGF;HIF1A;NFKB1;INS
GO_Biological_Process_2021	positive regulation of cell-substrate junction organization (GO:0150117)	0.000214617	0.00233602	0	0	8.54489	72.1757	DUSP3;ROCK1;RAC1;MAPRE2;PPM1F;VEGFA
GO_Biological_Process_2021	positive regulation of phospholipase activity (GO:0010518)	0.000214617	0.00233602	0	0	8.54489	72.1757	ARF4;PDGFRA;PDPK1;ARL1;ESR1;HRAS
GO_Biological_Process_2021	DNA topological change (GO:0006265)	0.000219198	0.00235109	0	0	20.467	172.446	TOP2A;TOP2B;HMGB1;TOP1
GO_Biological_Process_2021	intestinal epithelial cell differentiation (GO:0060575)	0.000219198	0.00235109	0	0	20.467	172.446	SRC;GATA6;GATA5;GATA4
GO_Biological_Process_2021	negative regulation of biomineralization (GO:0110150)	0.000219198	0.00235109	0	0	20.467	172.446	TGFB1;ROCK1;NOS3;ROCK2
GO_Biological_Process_2021	organic cyclic compound catabolic process (GO:1901361)	0.000219198	0.00235109	0	0	20.467	172.446	EPHX2;CYP1A2;HSD17B14;CYP3A4
GO_Biological_Process_2021	plasminogen activation (GO:0031639)	0.000219198	0.00235109	0	0	20.467	172.446	PLAU;F11;PLAT;KLKB1
GO_Biological_Process_2021	DNA-templated transcription, initiation (GO:0006352)	0.000219562	0.00235109	0	0	2.90872	24.5027	THRB;VDR;HDAC1;NR1H2;NR1I2;RORC;NR1H4;NR3C1;ESR1;ESR2;NR5A1;AR;RXRA;NPPA;PPARG;PPARA;PPARD
GO_Biological_Process_2021	positive regulation of tumor necrosis factor superfamily cytokine production (GO:1903557)	0.000227662	0.00243126	0	0	4.04437	33.9228	APP;IL6;PTPRC;SYK;STAT3;HSPB1;TWIST1;PTPN11;HMGB1;AZU1;JAK2
GO_Biological_Process_2021	positive regulation of epithelial cell proliferation (GO:0050679)	0.000230298	0.0024528	0	0	3.31227	27.744	EGF;HPN;MST1;PRKCA;HIF1A;F3;EGFR;VEGFA;TGM1;NRAS;ERBB2;AKT1;PRKD1;HRAS
GO_Biological_Process_2021	DNA unwinding involved in DNA replication (GO:0006268)	0.000234945	0.00245697	0	0	11.6408	97.2727	BLM;RAD51;MCM7;RECQL;MCM2
GO_Biological_Process_2021	heme catabolic process (GO:0042167)	0.000234945	0.00245697	0	0	11.6408	97.2727	SLCO1B1;UGT1A1;SLCO1B3;HMOX1;UGT1A4
GO_Biological_Process_2021	porphyrin-containing compound catabolic process (GO:0006787)	0.000234945	0.00245697	0	0	11.6408	97.2727	SLCO1B1;UGT1A1;SLCO1B3;HMOX1;UGT1A4
GO_Biological_Process_2021	positive regulation of leukocyte adhesion to vascular endothelial cell (GO:1904996)	0.000234945	0.00245697	0	0	11.6408	97.2727	IL6;TNF;SELE;RHOA;RELA
GO_Biological_Process_2021	positive regulation of small molecule metabolic process (GO:0062013)	0.000234945	0.00245697	0	0	11.6408	97.2727	ADIPOQ;AKT1;PPARG;PPARA;PPARD
GO_Biological_Process_2021	regulation of systemic arterial blood pressure (GO:0003073)	0.000234945	0.00245697	0	0	11.6408	97.2727	KLK1;NPPA;KLK3;SPX;KLK2
GO_Biological_Process_2021	cellular response to vascular endothelial growth factor stimulus (GO:0035924)	0.000236271	0.00245697	0	0	6.65178	55.5459	PIK3CA;MAPKAPK2;HSPB1;PRKD1;MAPK14;RELA;VEGFA
GO_Biological_Process_2021	negative regulation of blood vessel endothelial cell migration (GO:0043537)	0.000236271	0.00245697	0	0	6.65178	55.5459	ANGPT4;TGFB1;ANGPT2;PPARG;HMGB1;TNF;RHOA
GO_Biological_Process_2021	regulation of amyloid-beta formation (GO:1902003)	0.000236271	0.00245697	0	0	6.65178	55.5459	ROCK1;ROCK2;SP1;CASP3;PIN1;TNF;RELA
GO_Biological_Process_2021	negative regulation of cellular macromolecule biosynthetic process (GO:2000113)	0.000244947	0.00254052	0	0	1.94803	16.1968	RB1;GRB7;GSK3B;CSF2;HDAC1;TMPRSS6;FOXG1;NR1I2;GMNN;GATA6;TWIST1;GATA3;AHR;BRCA1;NR3C1;TNF;FOXO1;PPM1F;RELA;RPS6KA5;NKX3-1;KDM4A;JUN;TGFB1;VDR;EED;NR1H2;ADIPOQ;GZMB;DHFR;DDIT3;ID4;BIRC5;CTNNB1;PPARG;TP53;MPHOSPH8;PPARD
GO_Biological_Process_2021	regulation of insulin receptor signaling pathway (GO:0046626)	0.000250363	0.00258317	0	0	5.55196	46.0402	GRB7;PTPN1;PTPRE;RPS6KB1;PRKCD;PTPN11;PTPN2;INS
GO_Biological_Process_2021	regulation of receptor signaling pathway via JAK-STAT (GO:0046425)	0.000250363	0.00258317	0	0	5.55196	46.0402	IL10;IL6;PTPRC;EGF;CYP1B1;JAK2;F2;TNF
GO_Biological_Process_2021	cellular response to decreased oxygen levels (GO:0036294)	0.000253687	0.00260821	0	0	4.35884	36.0886	ANGPT4;LMNA;GATA6;TWIST1;HMOX1;PTGS2;TP53;HIF1A;NKX3-1;VEGFA
GO_Biological_Process_2021	ephrin receptor signaling pathway (GO:0048013)	0.000254107	0.00260821	0	0	3.9872	33.0051	CDC42;LYN;ROCK1;ROCK2;SRC;MMP2;PTPN11;RAC1;HRAS;MMP9;RHOA
GO_Biological_Process_2021	regulation of interleukin-6 production (GO:0032675)	0.000262803	0.00268357	0	0	3.45369	28.4726	IL10;APP;SYK;NOS2;STAT3;TWIST1;PTPN11;HMGB1;TNF;MAPK13;IL6;MAPKAPK2;PTPN6
GO_Biological_Process_2021	response to tumor necrosis factor (GO:0034612)	0.000262803	0.00268357	0	0	3.45369	28.4726	CXCL8;CCL20;ADIPOQ;GATA3;BRCA1;SELE;RELA;CASP8;CASP3;AKT1;JAK2;NFE2L2;NKX3-1
GO_Biological_Process_2021	positive regulation of NF-kappaB transcription factor activity (GO:0051092)	0.000265434	0.00270347	0	0	2.97181	24.4703	APP;PLA2G1B;STAT3;TRAF2;TNF;NFKB1;RELA;INS;NFKBIA;AR;IL6;RPS6KA5;NLRP3;PRKD1;TAB1;RHEBL1
GO_Biological_Process_2021	neuron projection development (GO:0031175)	0.000271183	0.00275494	0	0	2.85161	23.4194	RB1;LYN;APP;NCKAP1;GSK3B;ROCK1;LRRK2;PTEN;STMN4;HMGB1;KLK8;RAB11A;CDC42;IL6;TAOK3;MAPT;SGK1
GO_Biological_Process_2021	regulation of defense response (GO:0031347)	0.000283098	0.00284094	0	0	3.93162	32.1202	FGR;CYLD;CASP8;CMA1;ALOX15;CASP1;JAK2;PTGS2;SELE;MGLL;RELA
GO_Biological_Process_2021	base-excision repair, gap-filling (GO:0006287)	0.000285798	0.00284094	0	0	6.41389	52.3387	POLB;FEN1;PCNA;PARP1;APEX1;XRCC1;POLL
GO_Biological_Process_2021	cellular response to hydrogen peroxide (GO:0070301)	0.000285798	0.00284094	0	0	6.41389	52.3387	IL6;PRKCD;CYP1B1;RELA;RHOB;MAPK13;NFE2L2
GO_Biological_Process_2021	cellular response to virus (GO:0098586)	0.000285798	0.00284094	0	0	6.41389	52.3387	MAPK11;ARF1;IL6;IFNB1;BAX;MAPK14;HIF1A
GO_Biological_Process_2021	peptidyl-tyrosine dephosphorylation (GO:0035335)	0.000285798	0.00284094	0	0	6.41389	52.3387	PTPN1;DUSP3;PGP;PTPN11;PTPN6;PTPRF;PTPN2
GO_Biological_Process_2021	response to estrogen (GO:0043627)	0.000285798	0.00284094	0	0	6.41389	52.3387	GSTM3;AR;KRT19;ASH2L;BRCA1;GATA3;ESR1
GO_Biological_Process_2021	positive regulation of cell-substrate adhesion (GO:0010811)	0.000286102	0.00284094	0	0	4.28597	34.9699	CDC42;GSK3B;ALOX15;FN1;ILK;RAC3;RAC1;JAK2;SKAP1;PPM1F
GO_Biological_Process_2021	sterol metabolic process (GO:0016125)	0.000286102	0.00284094	0	0	4.28597	34.9699	CETP;RXRA;FDX1;PMVK;CYP51A1;PRKAG2;CYP1B1;HMGCR;CYP19A1;PPARD
GO_Biological_Process_2021	wound healing (GO:0042060)	0.000286102	0.00284094	0	0	4.28597	34.9699	PPP3CA;PDGFRA;MACF1;NOG;ALOX15;ERBB2;HMOX1;GATA4;RAF1;INS
GO_Biological_Process_2021	Fc-epsilon receptor signaling pathway (GO:0038095)	0.000287572	0.0028484	0	0	3.41827	27.8727	LYN;JUN;SYK;PDPK1;NFKB1;RELA;PPP3CA;MAPK9;PPP3CB;PIK3CA;MAPK1;TAB1;RAC1
GO_Biological_Process_2021	erythrocyte differentiation (GO:0030218)	0.000293153	0.00288923	0	0	5.40557	43.9733	ATP5IF1;LYN;CASP3;CEBPG;JAK2;GATA1;PTPN2;VEGFA
GO_Biological_Process_2021	interleukin-12-mediated signaling pathway (GO:0035722)	0.000293153	0.00288923	0	0	5.40557	43.9733	CDC42;RAP1B;IL10;ARF1;RALA;AIP;JAK2;JAK1
GO_Biological_Process_2021	membrane lipid biosynthetic process (GO:0046467)	0.000303927	0.00298059	0	0	4.7197	38.2235	SGPL1;PPM1L;PRKD1;PLPP3;HACD3;PLPP2;SGPP2;PLPP1;SGPP1
GO_Biological_Process_2021	regulation of phagocytosis (GO:0050764)	0.000303927	0.00298059	0	0	4.7197	38.2235	FGR;PTPRC;SYK;ADIPOQ;PRTN3;AZU1;GATA2;TNF;TGM2
GO_Biological_Process_2021	Fc receptor signaling pathway (GO:0038093)	0.000314306	0.00307229	0	0	3.38357	27.2889	LYN;JUN;SYK;PDPK1;NFKB1;RELA;PPP3CA;MAPK9;PPP3CB;PIK3CA;MAPK1;TAB1;RAC1
GO_Biological_Process_2021	response to insulin (GO:0032868)	0.000314828	0.00307229	0	0	3.87756	31.2666	CELA2A;PARP1;RPS6KB1;PDPK1;PLA2G1B;ADIPOQ;AKT1;PPARG;SLC2A4;RHOQ;FOXO1
GO_Biological_Process_2021	phosphatidylinositol-mediated signaling (GO:0048015)	0.000321908	0.00310912	0	0	4.21549	33.8978	PDGFRA;PIK3CA;RPS6KB1;ERBB2;PTEN;AKT1;PIK3C3;GATA3;EZR;RHOA
GO_Biological_Process_2021	response to metal ion (GO:0010038)	0.000321908	0.00310912	0	0	4.21549	33.8978	PPP2CA;PPP3CA;PPP2CB;PPP5C;KCNMA1;ALG2;BCL2;MAPT;HIF1A;CALM2
GO_Biological_Process_2021	positive regulation of blood coagulation (GO:0030194)	0.000322526	0.00310912	0	0	10.6702	85.7814	F12;SERPINE1;PLG;F2;F3
GO_Biological_Process_2021	positive regulation of positive chemotaxis (GO:0050927)	0.000322526	0.00310912	0	0	10.6702	85.7814	F7;CXCL8;AZU1;F3;VEGFA
GO_Biological_Process_2021	regulation of establishment of endothelial barrier (GO:1903140)	0.000322526	0.00310912	0	0	10.6702	85.7814	PROC;ROCK1;ROCK2;TNF;VEGFA
GO_Biological_Process_2021	cellular response to starvation (GO:0009267)	0.000330049	0.00317392	0	0	2.90856	23.3158	RALB;PRKAA2;MIOS;EHMT2;LRRK2;NPRL3;PRKAG1;PRKAG2;FOXO1;PRKAG3;RHEB;MAPK1;PIK3C3;PRKD1;PPARA;TP53
GO_Biological_Process_2021	epithelial to mesenchymal transition (GO:0001837)	0.000341731	0.00323898	0	0	5.26669	42.036	GSK3B;TGFB1;ROCK1;ROCK2;HGF;NOG;CTNNB1;HIF1A
GO_Biological_Process_2021	positive regulation of metabolic process (GO:0009893)	0.000343129	0.00323898	0	0	3.34956	26.7208	SYK;ADIPOQ;CXCR4;TNF;ACACB;TSHR;INS;VEGFA;ACLY;FASN;PIGA;JAK2;DECR1
GO_Biological_Process_2021	negative regulation of fat cell differentiation (GO:0045599)	0.00034333	0.00323898	0	0	6.19239	49.3956	IL6;TGFB1;ADIPOQ;GATA3;GATA2;TNF;FOXO1
GO_Biological_Process_2021	regulation of microtubule-based process (GO:0032886)	0.00034333	0.00323898	0	0	6.19239	49.3956	MACF1;GSK3B;CYLD;PRKAA2;ROCK1;ERBB2;MAPT
GO_Biological_Process_2021	endothelial cell development (GO:0001885)	0.000344173	0.00323898	0	0	7.6896	61.3197	RAP1B;GSTM3;RAP1A;EZR;MET;ICAM1
GO_Biological_Process_2021	negative regulation of protein transport (GO:0051224)	0.000344173	0.00323898	0	0	7.6896	61.3197	ADIPOQ;CYP51A1;CSK;HMGCR;PPM1F;INS
GO_Biological_Process_2021	positive regulation of protein insertion into mitochondrial membrane involved in apoptotic signaling pathway (GO:1900740)	0.000344173	0.00323898	0	0	7.6896	61.3197	YWHAE;CASP8;PPP3CC;BCL2;GZMB;TP53
GO_Biological_Process_2021	regulation of protein insertion into mitochondrial membrane involved in apoptotic signaling pathway (GO:1900739)	0.000344173	0.00323898	0	0	7.6896	61.3197	YWHAE;CASP8;PPP3CC;BCL2;GZMB;TP53
GO_Biological_Process_2021	retinoic acid metabolic process (GO:0042573)	0.000344173	0.00323898	0	0	7.6896	61.3197	UGT1A1;UGT1A3;CYP3A4;UGT1A9;UGT1A8;UGT1A7
GO_Biological_Process_2021	regulation of I-kappaB kinase/NF-kappaB signaling (GO:0043122)	0.000345111	0.00324011	0	0	2.53623	20.2179	MAP3K3;PDPK1;PPM1N;ADIPOQ;NR1H4;RHOH;HSPB1;TRAF2;TNF;ESR1;RHOA;RELA;FKBP1A;PPM1A;PPP5C;PPM1B;CASP8;CASP1;HMOX1;PRKD1
GO_Biological_Process_2021	mitotic DNA damage checkpoint signaling (GO:0044773)	0.000346784	0.00324813	0	0	4.62506	36.847	BLM;CCND1;TAOK3;CHEK1;PLK1;CDK2;ATM;BRCA1;TP53
GO_Biological_Process_2021	negative regulation of cholesterol storage (GO:0010887)	0.000354409	0.00328846	0	0	17.055	135.503	NR1H2;PPARG;PPARA;PPARD
GO_Biological_Process_2021	negative regulation of receptor binding (GO:1900121)	0.000354409	0.00328846	0	0	17.055	135.503	IL10;ADIPOQ;NOG;PTPRF
GO_Biological_Process_2021	regulation of neutrophil migration (GO:1902622)	0.000354409	0.00328846	0	0	17.055	135.503	RAC2;RHOG;RHOH;RAC1
GO_Biological_Process_2021	regulation of type B pancreatic cell development (GO:2000074)	0.000354409	0.00328846	0	0	17.055	135.503	GSK3B;RHEB;AKT1;FOXO1
GO_Biological_Process_2021	negative regulation of cell migration (GO:0030336)	0.000370442	0.00342918	0	0	2.99956	23.699	DUSP3;LRP1;SERPINE1;ADIPOQ;NOG;PTEN;MITF;MAPK15;RHOB;RAP2C;RAP2A;RAP2B;CYP1B1;HMOX1;RAC1
GO_Biological_Process_2021	cellular response to interleukin-12 (GO:0071349)	0.000396672	0.00366343	0	0	5.13476	40.2175	CDC42;RAP1B;IL10;ARF1;RALA;AIP;JAK2;JAK1
GO_Biological_Process_2021	insulin receptor signaling pathway (GO:0008286)	0.000404794	0.00372976	0	0	4.08124	31.8832	GSK3B;GRB7;ATP6AP1;PIK3CA;NAMPT;AKT1;RHOQ;FOXO1;PTPN2;INS
GO_Biological_Process_2021	phagocytosis, engulfment (GO:0006911)	0.000409779	0.00374088	0	0	5.98567	46.6876	CDC42;RAC2;RHOG;RHOH;RAC1;RHOBTB1;RHOBTB2
GO_Biological_Process_2021	phospholipid biosynthetic process (GO:0008654)	0.000409779	0.00374088	0	0	5.98567	46.6876	IDI1;FDPS;GPAM;IDI2;DOLPP1;MVD;CRLS1
GO_Biological_Process_2021	regulation of glucose import (GO:0046324)	0.000409779	0.00374088	0	0	5.98567	46.6876	PLA2G1B;ADIPOQ;PRKAG2;AKT1;PTPN11;RHOQ;INS
GO_Biological_Process_2021	regulation of vascular associated smooth muscle cell proliferation (GO:1904705)	0.000409779	0.00374088	0	0	5.98567	46.6876	IL10;JUN;MMP2;ADIPOQ;PTEN;PPARG;MMP9
GO_Biological_Process_2021	acute inflammatory response (GO:0002526)	0.000428477	0.00384397	0	0	7.32305	56.7922	IL6;HP;HPR;F3;ELANE;INS
GO_Biological_Process_2021	cellular response to cadmium ion (GO:0071276)	0.000428477	0.00384397	0	0	7.32305	56.7922	MAPK9;JUN;AKT1;MAPK1;MMP9;EGFR
GO_Biological_Process_2021	negative regulation of insulin receptor signaling pathway (GO:0046627)	0.000428477	0.00384397	0	0	7.32305	56.7922	GRB7;PTPN1;PTPRE;RPS6KB1;PRKCD;PTPN2
GO_Biological_Process_2021	positive regulation of gene silencing by miRNA (GO:2000637)	0.000428477	0.00384397	0	0	7.32305	56.7922	MAP2K1;IL6;TGFB1;STAT3;TP53;EGFR
GO_Biological_Process_2021	cellular response to alkaloid (GO:0071312)	0.000432751	0.00384397	0	0	9.84892	76.2833	BLM;RAD51;CASP3;TRPV1;TGM2
GO_Biological_Process_2021	positive regulation of amyloid-beta formation (GO:1902004)	0.000432751	0.00384397	0	0	9.84892	76.2833	ROCK2;SP1;CASP3;TNF;RELA
GO_Biological_Process_2021	positive regulation of cell adhesion mediated by integrin (GO:0033630)	0.000432751	0.00384397	0	0	9.84892	76.2833	P2RY12;SYK;RAC3;CXCL13;SKAP1
GO_Biological_Process_2021	positive regulation of fatty acid metabolic process (GO:0045923)	0.000432751	0.00384397	0	0	9.84892	76.2833	NR1H2;ADIPOQ;PPARG;PPARA;PPARD
GO_Biological_Process_2021	positive regulation of nitric-oxide synthase activity (GO:0051000)	0.000432751	0.00384397	0	0	9.84892	76.2833	DHFR;AKT1;TNF;HIF1A;INS
GO_Biological_Process_2021	regulation of oxidative stress-induced intrinsic apoptotic signaling pathway (GO:1902175)	0.000432751	0.00384397	0	0	9.84892	76.2833	BAG5;HSPB1;AKT1;INS;NFE2L2
GO_Biological_Process_2021	regulation of platelet aggregation (GO:0090330)	0.000432751	0.00384397	0	0	9.84892	76.2833	LYN;CELA2A;SYK;PRKCD;PRKCA
GO_Biological_Process_2021	regulation of single stranded viral RNA replication via double stranded DNA intermediate (GO:0045091)	0.000432751	0.00384397	0	0	9.84892	76.2833	TOP2A;TOP2B;CXCL8;APOBEC3G;MPHOSPH8
GO_Biological_Process_2021	DNA repair (GO:0006281)	0.000433684	0.00384397	0	0	2.26995	17.5767	DCLRE1A;KDM4A;FEN1;BLM;PCNA;DCLRE1C;PARP1;RECQL;XRCC1;BRCA1;POLB;PPP5C;RAD51;TDP1;APEX1;ERCC1;CHEK1;USP1;POLI;ATM;POLL;POLK;TP53;POLH
GO_Biological_Process_2021	sphingolipid metabolic process (GO:0006665)	0.000443467	0.00392192	0	0	3.25149	25.1044	ARSA;PPM1L;HACD3;SGPP2;SGPP1;NEU2;PPP2CA;SGPL1;PRKD1;PLPP3;PLPP2;GLA;PLPP1
GO_Biological_Process_2021	negative regulation of protein binding (GO:0032091)	0.000452464	0.00397486	0	0	4.01726	30.9361	GSK3B;RALB;ROCK1;LRRK2;ADIPOQ;PRKCD;AKT1;BAX;PIN1;PTPRF
GO_Biological_Process_2021	regulation of peptide hormone secretion (GO:0090276)	0.000452464	0.00397486	0	0	4.01726	30.9361	PPP3CB;CELA2A;IL6;RAP1A;NOS2;ITPR1;PRKCA;TNF;RAPGEF4;INS
GO_Biological_Process_2021	sphingolipid biosynthetic process (GO:0030148)	0.000452464	0.00397486	0	0	4.01726	30.9361	SGPL1;PPM1L;ST8SIA1;PRKD1;PLPP3;HACD3;PLPP2;SGPP2;PLPP1;SGPP1
GO_Biological_Process_2021	phosphate-containing compound metabolic process (GO:0006796)	0.000458542	0.00400197	0	0	2.54476	19.5627	DUSP3;TGFB1;PLPPR2;EPHX2;LRRK2;STAT3;PTEN;PPP3CA;PPM1A;PPP3CB;PTPRC;PIK3CA;PGP;AKT1;TOP1;PLPP3;PLPP2;PLPP1;PSPH
GO_Biological_Process_2021	regulation of cellular protein metabolic process (GO:0032268)	0.00045858	0.00400197	0	0	5.00926	38.5081	NFKBIA;APP;TGFB1;NR1H2;AKT1;MAPKAPK5;NFKB1;INS
GO_Biological_Process_2021	regulation of smooth muscle cell proliferation (GO:0048660)	0.00045858	0.00400197	0	0	5.00926	38.5081	PTGIR;IL6;AKT1;HMOX1;CTNNB1;PPARG;TNF;ELANE
GO_Biological_Process_2021	positive regulation of cellular protein metabolic process (GO:0032270)	0.000467209	0.00406831	0	0	3.43262	26.3238	NFKBIA;IL6;TGFB1;CASP8;RPS6KB1;NR1H2;PLK1;ERBB2;AKT1;EZR;LARP6;INS
GO_Biological_Process_2021	extracellular matrix organization (GO:0030198)	0.000477527	0.00414904	0	0	2.25327	17.2305	APP;PRSS1;TGFB1;TMPRSS6;LAMA1;CMA1;CTRB2;MMP2;SERPINE1;CTRB1;KLK5;FN1;KLK4;PLG;KLK2;NID1;MMP9;KLK7;ICAM1;CYP1B1;CTSG;TPSAB1;KLKB1;ELANE
GO_Biological_Process_2021	regulated exocytosis (GO:0045055)	0.000494106	0.00427402	0	0	2.69289	20.5003	CFD;LYN;APP;TGFB1;EGF;HGF;STXBP1;SERPINE1;STXBP2;FN1;F13A1;PLG;F5;VEGFA;RAB11B;PPP3CB;F8
GO_Biological_Process_2021	integrin-mediated signaling pathway (GO:0007229)	0.000504703	0.00427402	0	0	3.95525	30.0264	FGR;CDC42;SYK;SRC;PTPRA;CUL3;FN1;ILK;PRKD1;PLPP3
GO_Biological_Process_2021	alkaloid metabolic process (GO:0009820)	0.000508093	0.00427402	0	0	38.3307	290.732	CYP2D6;CYP1A2;CYP3A4
GO_Biological_Process_2021	cellular response to nicotine (GO:0071316)	0.000508093	0.00427402	0	0	38.3307	290.732	TNF;RELA;NFKB1
GO_Biological_Process_2021	gamma-aminobutyric acid metabolic process (GO:0009448)	0.000508093	0.00427402	0	0	38.3307	290.732	GAD1;ALDH1A1;GAD2
GO_Biological_Process_2021	negative regulation of blood coagulation, intrinsic pathway (GO:2000267)	0.000508093	0.00427402	0	0	38.3307	290.732	F8;F12;KLKB1
GO_Biological_Process_2021	negative regulation of myosin-light-chain-phosphatase activity (GO:0035509)	0.000508093	0.00427402	0	0	38.3307	290.732	ROCK1;ROCK2;TNF
GO_Biological_Process_2021	positive regulation of deoxyribonuclease activity (GO:0032077)	0.000508093	0.00427402	0	0	38.3307	290.732	PCNA;PRKCD;AKT1
GO_Biological_Process_2021	positive regulation of DNA ligation (GO:0051106)	0.000508093	0.00427402	0	0	38.3307	290.732	RAD51;XRCC1;HMGB1
GO_Biological_Process_2021	positive regulation of endothelial cell chemotaxis by VEGF-activated vascular endothelial growth factor receptor signaling pathway (GO:0038033)	0.000508093	0.00427402	0	0	38.3307	290.732	HSPB1;PRKD1;VEGFA
GO_Biological_Process_2021	positive regulation of transcription from RNA polymerase II promoter in response to hypoxia (GO:0061419)	0.000508093	0.00427402	0	0	38.3307	290.732	HIF1A;NFE2L2;VEGFA
GO_Biological_Process_2021	protein localization to microtubule end (GO:1905725)	0.000508093	0.00427402	0	0	38.3307	290.732	MAPRE3;MAPRE1;MAPRE2
GO_Biological_Process_2021	protein localization to microtubule plus-end (GO:1904825)	0.000508093	0.00427402	0	0	38.3307	290.732	MAPRE3;MAPRE1;MAPRE2
GO_Biological_Process_2021	regulation of blood coagulation, intrinsic pathway (GO:2000266)	0.000508093	0.00427402	0	0	38.3307	290.732	F8;F12;KLKB1
GO_Biological_Process_2021	regulation of miRNA metabolic process (GO:2000628)	0.000508093	0.00427402	0	0	38.3307	290.732	HRAS;RELA;NFKB1
GO_Biological_Process_2021	cellular response to organonitrogen compound (GO:0071417)	0.000511003	0.0042894	0	0	3.39472	25.729	RAP1B;P2RY12;RAP1A;NR1H4;CTNNB1;AHR;TRPV1;BRCA1;EZR;RELA;TSHR;MAPK13
GO_Biological_Process_2021	transcription by RNA polymerase II (GO:0006366)	0.000521965	0.00437215	0	0	2.19678	16.6031	THRB;CBFB;HDAC1;NR1I2;RORC;NR3C1;RXRA;NPPA;SUPT16H;PARP1;VDR;NR1H2;NR1H4;SSRP1;ESR1;NFKB1;ESR2;NR5A1;AR;NUDT21;SP1;PPARG;CDK13;PPARA;PPARD
GO_Biological_Process_2021	regulation of protein binding (GO:0043393)	0.000523352	0.00437452	0	0	3.18922	24.0954	APP;GSK3B;RALB;ROCK1;LRP1;LRRK2;PRKCD;PLK1;PPP2CA;FKBP1A;AKT1;PIN1;BAX
GO_Biological_Process_2021	leukocyte cell-cell adhesion (GO:0007159)	0.000528057	0.00438609	0	0	6.98982	52.7473	NT5E;ROCK1;SYK;EZR;SELE;ICAM1
GO_Biological_Process_2021	negative regulation of cellular response to insulin stimulus (GO:1900077)	0.000528057	0.00438609	0	0	6.98982	52.7473	GRB7;PTPN1;PTPRE;RPS6KB1;PRKCD;PTPN2
GO_Biological_Process_2021	regulation of small molecule metabolic process (GO:0062012)	0.000528057	0.00438609	0	0	6.98982	52.7473	EPHX2;ADIPOQ;RORC;NR1H4;PPARA;FMO5
GO_Biological_Process_2021	carnitine shuttle (GO:0006853)	0.000540303	0.00442289	0	0	14.6178	109.975	PRKAA2;PRKAG2;SLC25A20;ACACB
GO_Biological_Process_2021	establishment of epithelial cell apical/basal polarity (GO:0045198)	0.000540303	0.00442289	0	0	14.6178	109.975	CDC42;RAP2A;EZR;RHOA
GO_Biological_Process_2021	hepatocyte growth factor receptor signaling pathway (GO:0048012)	0.000540303	0.00442289	0	0	14.6178	109.975	HGF;HPN;MST1;RAC1
GO_Biological_Process_2021	interleukin-35-mediated signaling pathway (GO:0070757)	0.000540303	0.00442289	0	0	14.6178	109.975	STAT3;CANX;JAK2;JAK1
GO_Biological_Process_2021	negative regulation of calcium ion transmembrane transport (GO:1903170)	0.000540303	0.00442289	0	0	14.6178	109.975	FKBP1A;YWHAE;FKBP1B;VDAC1
GO_Biological_Process_2021	negative regulation of platelet-derived growth factor receptor signaling pathway (GO:0010642)	0.000540303	0.00442289	0	0	14.6178	109.975	PTGIR;LRP1;ADIPOQ;PTPN2
GO_Biological_Process_2021	regulation of cytoplasmic transport (GO:1903649)	0.000540303	0.00442289	0	0	14.6178	109.975	MAP2K1;SRC;LRRK2;MAPK1
GO_Biological_Process_2021	positive regulation of growth (GO:0045927)	0.000561843	0.00458029	0	0	3.89512	29.1522	CDC42;CSNK2A1;RPS6KA1;HPN;ERBB2;BCL2;AKT1;EGFR;PPM1F;INS
GO_Biological_Process_2021	positive regulation of interleukin-6 production (GO:0032755)	0.000561843	0.00458029	0	0	3.89512	29.1522	APP;IL6;SYK;NOS2;STAT3;TWIST1;PTPN11;HMGB1;TNF;MAPK13
GO_Biological_Process_2021	positive regulation of G protein-coupled receptor signaling pathway (GO:0045745)	0.000569144	0.00461134	0	0	9.14495	68.3254	KLK5;KLK14;PRKCA;F2;KLK6
GO_Biological_Process_2021	positive regulation of oxidoreductase activity (GO:0051353)	0.000569144	0.00461134	0	0	9.14495	68.3254	PDP1;POR;PDP2;RFK;TNF
GO_Biological_Process_2021	sphingosine metabolic process (GO:0006670)	0.000569144	0.00461134	0	0	9.14495	68.3254	PLPP3;SGPP2;PLPP2;SGPP1;PLPP1
GO_Biological_Process_2021	endothelial cell migration (GO:0043542)	0.000573358	0.00463601	0	0	5.61098	41.8804	PTP4A3;PIK3CA;NOS3;CYP1B1;PRSS3;RHOA;VEGFA
GO_Biological_Process_2021	gonad development (GO:0008406)	0.000605905	0.00487926	0	0	4.77577	35.3827	NR5A1;AR;PRKACG;GATA6;GATA4;GATA3;CYP19A1;GATA1
GO_Biological_Process_2021	mesenchymal cell differentiation (GO:0048762)	0.000605905	0.00487926	0	0	4.77577	35.3827	GSK3B;TGFB1;ROCK1;ROCK2;HGF;NOG;CTNNB1;HIF1A
GO_Biological_Process_2021	cellular response to UV (GO:0034644)	0.000624231	0.00501664	0	0	3.83678	28.3116	PCNA;PARP1;MMP2;ERCC1;CHEK1;PRKCD;POLK;MMP9;TP53;MAPK13
GO_Biological_Process_2021	establishment of endothelial barrier (GO:0061028)	0.000644733	0.00516047	0	0	6.68557	49.1167	RAP1B;RAP2C;RAP1A;RAP2B;EZR;ICAM1
GO_Biological_Process_2021	response to cadmium ion (GO:0046686)	0.000644733	0.00516047	0	0	6.68557	49.1167	MAPK9;JUN;AKT1;MAPK1;MMP9;EGFR
GO_Biological_Process_2021	regulation of cell cycle process (GO:0010564)	0.000663638	0.00530108	0	0	3.28586	24.0452	CDC42;CSNK2A1;CHEK1;CSNK2A2;PLK1;PIN1;CTNNB1;PIK3C3;CDK13;CALM2;RAB11A;BCL2L1
GO_Biological_Process_2021	fatty acid derivative biosynthetic process (GO:1901570)	0.000672597	0.00535106	0	0	5.44067	39.7406	ACLY;BDH2;HPGD;FASN;HMGCS2;HSD17B8;CBR4
GO_Biological_Process_2021	regulation of nitric oxide biosynthetic process (GO:0045428)	0.000672597	0.00535106	0	0	5.44067	39.7406	ROCK2;AKT1;RAC1;PTGS2;JAK2;TNF;GLA
GO_Biological_Process_2021	fatty acid beta-oxidation (GO:0006635)	0.000692707	0.00548591	0	0	4.66699	33.9519	MECR;BDH2;AMACR;ADIPOQ;DECR2;HSD17B10;PPARD;DECR1
GO_Biological_Process_2021	negative regulation of cellular biosynthetic process (GO:0031327)	0.000692707	0.00548591	0	0	4.66699	33.9519	ROCK2;MST1;ADIPOQ;PGP;BRCA1;GLA;NFKB1;INS
GO_Biological_Process_2021	T cell activation (GO:0042110)	0.0006937	0.00548591	0	0	3.49313	25.4072	FKBP1A;PPP3CA;PPP3CB;CASP8;PTPRC;LCK;IFNB1;RHOH;GATA3;PTPN2;INS
GO_Biological_Process_2021	positive regulation of multicellular organismal process (GO:0051240)	0.00069889	0.00551594	0	0	2.11298	15.353	LRP1;ROCK1;SERPINE1;GATA5;TWIST1;CXCR4;TNF;INS;JAK2;DECR1;IL10;TGFB1;SYK;VDR;EGF;MST1;NOG;ADIPOQ;PTPN11;TSHR;VEGFA;BATF;FGR;KAT2A;IL6;CTNNB1
GO_Biological_Process_2021	regulation of cell-matrix adhesion (GO:0001952)	0.000721355	0.00567065	0	0	4.12823	29.8652	GSK3B;MACF1;DUSP3;ROCK1;PLAU;ROCK2;PTPRA;RHOA;SKAP1
GO_Biological_Process_2021	steroid biosynthetic process (GO:0006694)	0.000721355	0.00567065	0	0	4.12823	29.8652	AMACR;HSD17B1;PMVK;CYP51A1;PRKAG2;HMGCR;LSS;CYP19A1;HSD17B10
GO_Biological_Process_2021	cortical actin cytoskeleton organization (GO:0030866)	0.000735414	0.00575832	0	0	8.53484	61.5795	NCKAP1;ROCK1;ROCK2;TNF;RHOQ
GO_Biological_Process_2021	regulation of acute inflammatory response (GO:0002673)	0.000735414	0.00575832	0	0	8.53484	61.5795	IL6;F12;NLRP3;KLKB1;INS
GO_Biological_Process_2021	regulation of epithelial cell proliferation (GO:0050678)	0.000760438	0.00594252	0	0	3.45035	24.7791	GPX1;TGFB1;ANGPT1;HPN;ERBB2;PRKD1;HRAS;SGPP2;EGFR;NKX3-1;VEGFA
GO_Biological_Process_2021	recombinational repair (GO:0000725)	0.000766223	0.00597593	0	0	3.72518	26.7246	MORF4L1;FEN1;BLM;RAD51;PARP1;MCM9;RECQL;XRCC1;POLL;BRCA1
GO_Biological_Process_2021	positive regulation of lipid kinase activity (GO:0090218)	0.000780421	0.00606009	0	0	6.40667	45.844	P2RY12;FGR;PDGFRA;TGFB1;PRKD1;F2
GO_Biological_Process_2021	regulation of mitochondrial membrane potential (GO:0051881)	0.000784968	0.00606009	0	0	5.28037	37.754	ATP5IF1;LRRK2;BCL2;AKT1;BAX;MAPT;BCL2L1
GO_Biological_Process_2021	regulation of release of cytochrome c from mitochondria (GO:0090199)	0.000784968	0.00606009	0	0	5.28037	37.754	GPX1;HGF;AKT1;BAX;MMP9;TP53;BCL2L1
GO_Biological_Process_2021	negative regulation of gene silencing by miRNA (GO:0060965)	0.000786291	0.00606009	0	0	12.7899	91.4245	TGFB1;PPARG;TNF;ESR1
GO_Biological_Process_2021	regulation of leukocyte cell-cell adhesion (GO:1903037)	0.000786291	0.00606009	0	0	12.7899	91.4245	LCK;AKT1;PPARA;SKAP1
GO_Biological_Process_2021	replicative senescence (GO:0090399)	0.000786291	0.00606009	0	0	12.7899	91.4245	CHEK1;SERPINE1;ATM;TP53
GO_Biological_Process_2021	epidermal cell differentiation (GO:0009913)	0.00078925	0.00606009	0	0	4.56304	32.6003	TGM1;ST14;HDAC1;CASP3;GATA6;TXNIP;CTNNB1;TGM3
GO_Biological_Process_2021	regulation of DNA replication (GO:0006275)	0.00078925	0.00606009	0	0	4.56304	32.6003	PPP2CA;BLM;PCNA;ATAD5;EGF;EHMT2;GMNN;EGFR
GO_Biological_Process_2021	regulation of cellular component organization (GO:0051128)	0.000803915	0.00616076	0	0	2.88589	20.5649	OGFR;PTPN1;ROCK1;ROCK2;TRAF2;PTPN11;SSRP1;TNF;KLK8;RAP1B;BAG5;RAP1A;RIT2;SGK1
GO_Biological_Process_2021	negative regulation of cell cycle (GO:0045786)	0.0008466	0.00646287	0	0	3.67177	25.9752	RB1;IL10;TGFB1;HPGD;GMNN;PLK1;PTEN;GATA3;NKX3-1;RHOB
GO_Biological_Process_2021	negative regulation of cellular component organization (GO:0051129)	0.0008466	0.00646287	0	0	3.67177	25.9752	CDC42;GSK3B;AR;DNAJB1;SRC;NR1H4;PRKD1;RAF1;TNF;VEGFA
GO_Biological_Process_2021	regulation of proteolysis (GO:0030162)	0.000896314	0.00681611	0	0	4.46361	31.3222	CASP8;PLK1;PRSS37;AKT1;PLAT;NEDD8;F2;INS
GO_Biological_Process_2021	unsaturated fatty acid metabolic process (GO:0033559)	0.000896314	0.00681611	0	0	4.46361	31.3222	GPX1;CYP2D6;ALOX15;EPHX1;CYP1B1;DECR2;MGLL;PTGS1
GO_Biological_Process_2021	negative regulation of protein catabolic process (GO:0042177)	0.000911663	0.00691956	0	0	5.12924	35.9059	IL10;ROCK1;CYP51A1;PIN1;HMGCR;EGFR;INS
GO_Biological_Process_2021	positive regulation of cellular amide metabolic process (GO:0034250)	0.000933775	0.00703204	0	0	3.61987	25.2532	IL6;RPS6KB1;ROCK2;SP1;CASP3;PRKCD;ERBB2;TNF;RELA;LARP6
GO_Biological_Process_2021	androgen metabolic process (GO:0008209)	0.00093544	0.00703204	0	0	8.001	55.8029	CYP3A4;HSD17B11;CYP19A1;HSD17B10;UGT2B7
GO_Biological_Process_2021	error-prone translesion synthesis (GO:0042276)	0.00093544	0.00703204	0	0	8.001	55.8029	PCNA;REV1;POLI;POLK;POLH
GO_Biological_Process_2021	intracellular lipid transport (GO:0032365)	0.00093544	0.00703204	0	0	8.001	55.8029	PRKAA2;PRKAG2;SLC25A20;ACACB;SGPP1
GO_Biological_Process_2021	cellular nitrogen compound biosynthetic process (GO:0044271)	0.000937133	0.00703204	0	0	6.15008	42.8826	NQO1;ARG2;NOS2;NOS3;AKT1;CYP1B1
GO_Biological_Process_2021	positive regulation of leukocyte cell-cell adhesion (GO:1903039)	0.000937133	0.00703204	0	0	6.15008	42.8826	IL6;LCK;TNF;RELA;RHOA;SKAP1
GO_Biological_Process_2021	organonitrogen compound biosynthetic process (GO:1901566)	0.00098232	0.00731379	0	0	2.70392	18.7262	GSTM3;ARG2;CSNK2A1;PPM1L;CSNK2A2;AKR1A1;HACD3;SGPP2;SGPP1;SGPL1;TYW1;PRKD1;PLPP3;PLPP2;PLPP1
GO_Biological_Process_2021	activation of cysteine-type endopeptidase activity involved in apoptotic process by cytochrome c (GO:0008635)	0.000987601	0.00731379	0	0	25.5525	176.829	BAX;CYCS;BOK
GO_Biological_Process_2021	coumarin metabolic process (GO:0009804)	0.000987601	0.00731379	0	0	25.5525	176.829	CYP2D6;UGT1A8;UGT1A7
GO_Biological_Process_2021	regulation of hyaluronan biosynthetic process (GO:1900125)	0.000987601	0.00731379	0	0	25.5525	176.829	TGFB1;EGF;NFKB1
GO_Biological_Process_2021	regulation of nitric oxide mediated signal transduction (GO:0010749)	0.000987601	0.00731379	0	0	25.5525	176.829	EGFR;INS;VEGFA
GO_Biological_Process_2021	response to testosterone (GO:0033574)	0.000987601	0.00731379	0	0	25.5525	176.829	AR;ROCK2;NKX3-1
GO_Biological_Process_2021	T-helper 17 cell lineage commitment (GO:0072540)	0.000987601	0.00731379	0	0	25.5525	176.829	IL6;STAT3;BATF
GO_Biological_Process_2021	regulation of tyrosine phosphorylation of STAT protein (GO:0042509)	0.00100577	0.00743442	0	0	3.9177	27.04	PPP2CA;LYN;IL6;CSF2;STAT3;JAK2;TNF;PTPN2;VEGFA
GO_Biological_Process_2021	positive regulation of response to DNA damage stimulus (GO:2001022)	0.00101471	0.00748656	0	0	4.36842	30.1121	SPRED1;PCNA;PRKCD;CEBPG;ATM;BRCA1;EGFR;NKX3-1
GO_Biological_Process_2021	development of primary male sexual characteristics (GO:0046546)	0.00105393	0.00771841	0	0	4.9865	34.1836	NR5A1;AR;PRKACG;GATA6;GATA4;GATA3;GATA1
GO_Biological_Process_2021	male gonad development (GO:0008584)	0.00105393	0.00771841	0	0	4.9865	34.1836	NR5A1;AR;PRKACG;GATA6;GATA4;GATA3;GATA1
GO_Biological_Process_2021	negative regulation of proteolysis (GO:0045861)	0.00105393	0.00771841	0	0	4.9865	34.1836	IL10;ROCK1;LRRK2;AKT1;PLAT;F2;INS
GO_Biological_Process_2021	regulation of cell-substrate adhesion (GO:0010810)	0.00105393	0.00771841	0	0	4.9865	34.1836	ALOX15;RAC2;PLG;RAC1;JAK2;PPM1F;RHOA
GO_Biological_Process_2021	entry into host (GO:0044409)	0.00110194	0.00795241	0	0	11.3682	77.4253	SRC;CXCR4;CTNNB1;MET
GO_Biological_Process_2021	negative regulation of gluconeogenesis (GO:0045721)	0.00110194	0.00795241	0	0	11.3682	77.4253	ADIPOQ;MST1;PGP;INS
GO_Biological_Process_2021	positive regulation of lipid transport (GO:0032370)	0.00110194	0.00795241	0	0	11.3682	77.4253	CETP;LRP1;ADIPOQ;CYP19A1
GO_Biological_Process_2021	positive regulation of transporter activity (GO:0032411)	0.00110194	0.00795241	0	0	11.3682	77.4253	RXRA;KMT2A;ADIPOQ;SGK1
GO_Biological_Process_2021	regulation of actomyosin structure organization (GO:0110020)	0.00110194	0.00795241	0	0	11.3682	77.4253	CDC42;ROCK1;ROCK2;RAC1
GO_Biological_Process_2021	regulation of leukocyte adhesion to vascular endothelial cell (GO:1904994)	0.00110194	0.00795241	0	0	11.3682	77.4253	IL6;TNF;RHOA;RELA
GO_Biological_Process_2021	regulation of platelet-derived growth factor receptor signaling pathway (GO:0010640)	0.00110194	0.00795241	0	0	11.3682	77.4253	F7;PTGIR;ADIPOQ;F3
GO_Biological_Process_2021	regulation of receptor signaling pathway via STAT (GO:1904892)	0.00110194	0.00795241	0	0	11.3682	77.4253	IL6;PTPRC;EGF;JAK2
GO_Biological_Process_2021	positive regulation of lamellipodium organization (GO:1902745)	0.00111696	0.0080462	0	0	5.91323	40.1931	CDC42;NCKAP1;PIK3CA;SRC;RAC2;RAC1
GO_Biological_Process_2021	regulation of interleukin-1 beta production (GO:0032651)	0.00113024	0.00812706	0	0	3.52033	23.8866	APP;IL6;CASP8;STAT3;CASP1;HSPB1;NLRP3;AZU1;JAK2;TNF
GO_Biological_Process_2021	microglial cell activation (GO:0001774)	0.00117324	0.00839059	0	0	7.52996	50.812	APP;AZU1;MAPT;JAK2;TNF
GO_Biological_Process_2021	negative regulation of small molecule metabolic process (GO:0062014)	0.00117324	0.00839059	0	0	7.52996	50.812	ADIPOQ;MST1;PGP;UGT1A8;INS
GO_Biological_Process_2021	regulation of lipid storage (GO:0010883)	0.00117324	0.00839059	0	0	7.52996	50.812	NFKBIA;IL6;TNF;NFKB1;PTPN2
GO_Biological_Process_2021	regulation of peptidyl-serine phosphorylation (GO:0033135)	0.00117919	0.0084179	0	0	3.25121	21.9227	APP;IL6;TGFB1;PTEN;AKT1;PRKD1;RAF1;TNF;EGFR;PPM1F;VEGFA
GO_Biological_Process_2021	positive regulation of cell-matrix adhesion (GO:0001954)	0.00121306	0.00864411	0	0	4.85148	32.5758	GSK3B;ROCK1;RRAS;RAC1;PPM1F;SKAP1;VEGFA
GO_Biological_Process_2021	regulation of cytokinesis (GO:0032465)	0.00124043	0.00882331	0	0	3.47257	23.2395	CDC42;CUL3;PLK1;PIN1;PIK3C3;CALM2;RHOA;RAB11A;CDC25B;BCL2L1
GO_Biological_Process_2021	mitotic G2 DNA damage checkpoint signaling (GO:0007095)	0.00132209	0.00935379	0	0	5.69393	37.7424	BLM;TAOK3;CHEK1;PLK1;ATM;BRCA1
GO_Biological_Process_2021	negative regulation of smooth muscle cell proliferation (GO:0048662)	0.00132209	0.00935379	0	0	5.69393	37.7424	IL10;PTGIR;ADIPOQ;PTEN;HMOX1;PPARG
GO_Biological_Process_2021	positive regulation of receptor signaling pathway via JAK-STAT (GO:0046427)	0.00132209	0.00935379	0	0	5.69393	37.7424	IL10;IL6;CYP1B1;JAK2;F2;TNF
GO_Biological_Process_2021	positive regulation of programmed cell death (GO:0043068)	0.00134385	0.00949076	0	0	2.15486	14.2484	TOP2A;JUN;SYK;NOS2;LRRK2;GZMA;HMGB1;TNF;FOXO1;RHOB;IL6;CASP8;CASP3;KCNMA1;CYP1B1;CTNNB1;BAX;ATM;TP53;CTSD;TGM2;BOK
GO_Biological_Process_2021	positive regulation of cellular protein localization (GO:1903829)	0.00137488	0.00969266	0	0	3.72756	24.5623	GSK3B;PRKAA2;TGFB1;PLK1;AKT1;MAPT;F2;TNF;INS
GO_Biological_Process_2021	mitotic G2/M transition checkpoint (GO:0044818)	0.00139039	0.00978346	0	0	4.72356	31.0724	BLM;TAOK3;CHEK1;PLK1;ATM;BRCA1;NAE1
GO_Biological_Process_2021	organic acid transport (GO:0015849)	0.0013927	0.00978346	0	0	3.17781	20.8989	SLC25A48;SLCO1B1;SLC25A29;RXRA;SLC10A1;SLCO1B3;NR1H4;SLC25A10;SLC25A45;SLC25A11;PPARD
GO_Biological_Process_2021	regulation of signal transduction (GO:0009966)	0.00143441	0.0100587	0	0	2.4228	15.8621	APP;PTPN1;TGFB1;CBFB;SRC;LRRK2;ADIPOQ;ALOX15;ILK;GATA3;ESR1;PPP2CA;RGS4;CSK;PRKD1;MGLL;PTPN2
GO_Biological_Process_2021	positive regulation of mitotic cell cycle phase transition (GO:1901992)	0.00144652	0.0100994	0	0	4.10567	26.8453	RB1;CCND1;CDK4;CUL3;AKT1;EGFR;RAB11A;CDC25B
GO_Biological_Process_2021	regulation of tumor necrosis factor-mediated signaling pathway (GO:0010803)	0.00144652	0.0100994	0	0	4.10567	26.8453	CYLD;CASP8;SYK;ADIPOQ;CASP1;TRAF2;TNF;PTPN2
GO_Biological_Process_2021	positive regulation of cell cycle G2/M phase transition (GO:1902751)	0.00145297	0.0100994	0	0	7.11126	46.466	ATAD5;CCND1;CDK4;RAB11A;CDC25B
GO_Biological_Process_2021	positive regulation of protein autophosphorylation (GO:0031954)	0.00145297	0.0100994	0	0	7.11126	46.466	RAP2C;RAP2A;CALM2;INS;VEGFA
GO_Biological_Process_2021	regulation of interferon-gamma-mediated signaling pathway (GO:0060334)	0.00145297	0.0100994	0	0	7.11126	46.466	NR1H2;PPARG;JAK2;PTPN2;JAK1
GO_Biological_Process_2021	positive regulation of transferase activity (GO:0051347)	0.00148018	0.0102249	0	0	2.69079	17.5321	PDGFRA;TGFB1;PCNA;MUSK;ADIPOQ;PLK1;MAPK15;EGFR;ERBB2;PIN1;MAPK1;CTNNB1;MAPKAPK5;MET
GO_Biological_Process_2021	glucose homeostasis (GO:0042593)	0.0014871	0.0102249	0	0	3.38084	22.0124	IL6;PRKAA2;ADIPOQ;STAT3;PPARG;SLC2A4;HIF1A;FOXO1;PTPN2;INS
GO_Biological_Process_2021	growth hormone receptor signaling pathway via JAK-STAT (GO:0060397)	0.00149684	0.0102249	0	0	10.2309	66.5456	LYN;PTPN1;STAT3;JAK2
GO_Biological_Process_2021	myeloid dendritic cell activation (GO:0001773)	0.00149684	0.0102249	0	0	10.2309	66.5456	CSF2;HMGB1;DHRS2;BATF
GO_Biological_Process_2021	negative regulation of pri-miRNA transcription by RNA polymerase II (GO:1902894)	0.00149684	0.0102249	0	0	10.2309	66.5456	PPARG;PPARA;RELA;PPARD
GO_Biological_Process_2021	polarized epithelial cell differentiation (GO:0030859)	0.00149684	0.0102249	0	0	10.2309	66.5456	CDC42;RAP2A;EZR;RHOA
GO_Biological_Process_2021	positive regulation of superoxide anion generation (GO:0032930)	0.00149684	0.0102249	0	0	10.2309	66.5456	TGFB1;SYK;PRKCD;MAPT
GO_Biological_Process_2021	regulation of IRE1-mediated unfolded protein response (GO:1903894)	0.00149684	0.0102249	0	0	10.2309	66.5456	PTPN1;COPS5;BAX;BFAR
GO_Biological_Process_2021	ribonucleoside monophosphate biosynthetic process (GO:0009156)	0.00149684	0.0102249	0	0	10.2309	66.5456	IMPDH1;IMPDH2;RFK;GART
GO_Biological_Process_2021	T-helper cell differentiation (GO:0042093)	0.00149684	0.0102249	0	0	10.2309	66.5456	IL6;RORC;HMGB1;BATF
GO_Biological_Process_2021	negative regulation of mitochondrion organization (GO:0010823)	0.00155477	0.0105993	0	0	5.49029	35.5025	VAT1;GPX1;HGF;AKT1;MAPT;BCL2L1
GO_Biological_Process_2021	regulation of cell growth (GO:0001558)	0.00155699	0.0105993	0	0	2.33423	15.0908	RB1;OGFR;TGFB1;CSNK2A1;EI24;HPN;EGFR;ESR2;RERG;INS;PPP2CA;CDC42;RPS6KA1;ERBB2;BCL2;AKT1;SGK1;TP53
GO_Biological_Process_2021	positive regulation of hydrolase activity (GO:0051345)	0.00157837	0.0107264	0	0	2.67072	17.2298	GSK3B;CCL20;PRSS22;RHOA;MAPK12;TBC1D2;RAP1A;ERBB2;PIN1;PRTN3;CALM2;HRAS;MAPRE2;TGM2
GO_Biological_Process_2021	positive regulation of response to stimulus (GO:0048584)	0.00158734	0.0107321	0	0	4.6022	29.6644	ARG2;PLA2G1B;ADIPOQ;PRKCD;ILK;GATA3;NKX3-1
GO_Biological_Process_2021	regulation of fibroblast proliferation (GO:0048145)	0.00158734	0.0107321	0	0	4.6022	29.6644	PDGFRA;PLA2G1B;CDK4;FN1;CTNNB1;EMD;TP53
GO_Biological_Process_2021	regulation of telomerase activity (GO:0051972)	0.00158734	0.0107321	0	0	4.6022	29.6644	SRC;MAPK1;CTNNB1;MAPKAPK5;ATM;MAPK15;TP53
GO_Biological_Process_2021	fatty acid oxidation (GO:0019395)	0.00161902	0.0109277	0	0	4.02496	25.8641	PECR;MECR;BDH2;ADIPOQ;ALOX15;HSD17B10;PPARD;DECR1
GO_Biological_Process_2021	positive regulation of cell growth (GO:0030307)	0.00163692	0.0110297	0	0	3.10765	19.9354	CDC42;MACF1;CSNK2A1;RPS6KA1;HPN;ERBB2;BCL2;AKT1;MAPT;EGFR;INS
GO_Biological_Process_2021	response to molecule of bacterial origin (GO:0002237)	0.00167645	0.0111106	0	0	3.61069	23.0762	IL10;IL6;CXCL8;NOS2;NOS3;MAPKAPK2;JAK2;CXCL2;SELE
GO_Biological_Process_2021	arginine catabolic process (GO:0006527)	0.00167978	0.0111106	0	0	19.1633	122.436	ARG2;NOS2;NOS3
GO_Biological_Process_2021	cellular amino acid biosynthetic process (GO:0008652)	0.00167978	0.0111106	0	0	19.1633	122.436	GAD1;ALDH1A1;GAD2
GO_Biological_Process_2021	death-inducing signaling complex assembly (GO:0071550)	0.00167978	0.0111106	0	0	19.1633	122.436	CASP8;TRAF2;TNF
GO_Biological_Process_2021	negative regulation of interferon-gamma-mediated signaling pathway (GO:0060336)	0.00167978	0.0111106	0	0	19.1633	122.436	NR1H2;PPARG;PTPN2
GO_Biological_Process_2021	negative regulation of response to interferon-gamma (GO:0060331)	0.00167978	0.0111106	0	0	19.1633	122.436	NR1H2;PPARG;PTPN2
GO_Biological_Process_2021	positive regulation of hormone metabolic process (GO:0032352)	0.00167978	0.0111106	0	0	19.1633	122.436	HPN;GATA3;HIF1A
GO_Biological_Process_2021	positive regulation of miRNA metabolic process (GO:2000630)	0.00167978	0.0111106	0	0	19.1633	122.436	HRAS;RELA;NFKB1
GO_Biological_Process_2021	regulation of calcidiol 1-monooxygenase activity (GO:0060558)	0.00167978	0.0111106	0	0	19.1633	122.436	VDR;TNF;NFKB1
GO_Biological_Process_2021	regulation of myosin-light-chain-phosphatase activity (GO:0035507)	0.00167978	0.0111106	0	0	19.1633	122.436	ROCK1;ROCK2;TNF
GO_Biological_Process_2021	sphingosine-1-phosphate receptor signaling pathway (GO:0003376)	0.00167978	0.0111106	0	0	19.1633	122.436	AKT1;RAC1;EZR
GO_Biological_Process_2021	positive regulation of apoptotic process (GO:0043065)	0.00169916	0.0112201	0	0	2.07258	13.2181	TOP2A;JUN;IFNB1;GZMA;ADIPOQ;HMGB1;TNF;FOXO1;RHOB;IL6;CASP8;DDIT3;CASP3;KCNMA1;CYP1B1;CTNNB1;BAX;ATM;TP53;CTSD;TGM2;NKX3-1;BOK
GO_Biological_Process_2021	dendritic cell differentiation (GO:0097028)	0.00177885	0.0115918	0	0	6.73663	42.6549	LYN;CSF2;PRTN3;DHRS2;BATF
GO_Biological_Process_2021	negative regulation of NIK/NF-kappaB signaling (GO:1901223)	0.00177885	0.0115918	0	0	6.73663	42.6549	PPM1A;CYLD;PPM1B;NLRP3;RELA
GO_Biological_Process_2021	negative regulation of synaptic transmission (GO:0050805)	0.00177885	0.0115918	0	0	6.73663	42.6549	ARF1;STXBP1;LRRK2;ADIPOQ;PTEN
GO_Biological_Process_2021	positive regulation of lamellipodium assembly (GO:0010592)	0.00177885	0.0115918	0	0	6.73663	42.6549	CDC42;NCKAP1;PIK3CA;RAC2;RAC1
GO_Biological_Process_2021	positive regulation of neuron apoptotic process (GO:0043525)	0.00177885	0.0115918	0	0	6.73663	42.6549	DDIT3;CTNNB1;BAX;TNF;MCL1
GO_Biological_Process_2021	positive regulation of transcription from RNA polymerase II promoter in response to stress (GO:0036003)	0.00177885	0.0115918	0	0	6.73663	42.6549	DDIT3;HIF1A;TP53;VEGFA;NFE2L2
GO_Biological_Process_2021	protein kinase B signaling (GO:0043491)	0.00177885	0.0115918	0	0	6.73663	42.6549	TGFB1;PTEN;AKT1;TNF;NKX3-1
GO_Biological_Process_2021	regulation of monooxygenase activity (GO:0032768)	0.00177885	0.0115918	0	0	6.73663	42.6549	POR;VDR;NOS3;AKT1;EGFR
GO_Biological_Process_2021	positive regulation of cell-cell adhesion (GO:0022409)	0.00180532	0.0117065	0	0	4.48692	28.3439	IL10;LCK;CXCL13;PLPP3;TNF;SKAP1;JAK1
GO_Biological_Process_2021	regulation of cellular metabolic process (GO:0031323)	0.00180532	0.0117065	0	0	4.48692	28.3439	ARF4;ACLY;ARF1;FASN;CYP1B1;PPARA;ACACB
GO_Biological_Process_2021	regulation of protein localization to nucleus (GO:1900180)	0.00180532	0.0117065	0	0	4.48692	28.3439	GSK3B;TGFB1;PLK1;AKT1;PIN1;F2;INS
GO_Biological_Process_2021	positive regulation of lipid biosynthetic process (GO:0046889)	0.00181731	0.011765	0	0	5.30069	33.4495	NR1H2;SIRT4;AKT1;HSD17B13;PPARA;INS
GO_Biological_Process_2021	regulation of insulin secretion (GO:0050796)	0.00191505	0.0123776	0	0	3.0405	19.0275	IL6;PPP3CB;CELA2A;RAP1A;NOS2;ITPR1;SIRT4;NR1H4;PRKCA;TNF;RAPGEF4
GO_Biological_Process_2021	supramolecular fiber organization (GO:0097435)	0.00192032	0.0123914	0	0	1.98463	12.4144	APP;PLA2G1B;RHOBTB3;STMN4;RND2;RND3;RHOBTB1;RHOBTB2;RND1;INS;CDC42;NPPA;RAC2;CYP1B1;RAC3;RAC1;RHOG;RHOH;RHOF;RHOD;RHOA;RHOB;FKBP1A;PIN1;MAPT
GO_Biological_Process_2021	protein modification by small protein removal (GO:0070646)	0.00195301	0.0125349	0	0	2.12762	13.2729	USP2;PTEN;KEAP1;NEDD8;TRAF2;GATA3;BRCA1;HIF1A;ESR1;RHOA;NFKBIA;POLB;AR;CYLD;KAT2A;COPS5;USP1;NLRP3;TAB1;COPS8;TP53
GO_Biological_Process_2021	establishment of apical/basal cell polarity (GO:0035089)	0.00198053	0.0125349	0	0	9.30029	57.8886	CDC42;RAP2A;EZR;RHOA
GO_Biological_Process_2021	GTP metabolic process (GO:0046039)	0.00198053	0.0125349	0	0	9.30029	57.8886	IMPDH1;LRRK2;IMPDH2;RHOQ
GO_Biological_Process_2021	interleukin-27-mediated signaling pathway (GO:0070106)	0.00198053	0.0125349	0	0	9.30029	57.8886	STAT3;CANX;JAK2;JAK1
GO_Biological_Process_2021	lipoxygenase pathway (GO:0019372)	0.00198053	0.0125349	0	0	9.30029	57.8886	GPX1;HPGD;ALOX15;PTGS2
GO_Biological_Process_2021	negative regulation of blood pressure (GO:0045776)	0.00198053	0.0125349	0	0	9.30029	57.8886	NOS2;NOS3;ADIPOQ;NPPA
GO_Biological_Process_2021	positive regulation of endothelial cell chemotaxis (GO:2001028)	0.00198053	0.0125349	0	0	9.30029	57.8886	HSPB1;PRKD1;MET;VEGFA
GO_Biological_Process_2021	positive regulation of heterotypic cell-cell adhesion (GO:0034116)	0.00198053	0.0125349	0	0	9.30029	57.8886	IL10;LCK;TNF;SKAP1
GO_Biological_Process_2021	positive regulation of protein export from nucleus (GO:0046827)	0.00198053	0.0125349	0	0	9.30029	57.8886	YWHAE;GSK3B;EMD;TP53
GO_Biological_Process_2021	regulation of integrin activation (GO:0033623)	0.00198053	0.0125349	0	0	9.30029	57.8886	RAP1B;SRC;CXCL13;SKAP1
GO_Biological_Process_2021	regulation of macrophage differentiation (GO:0045649)	0.00198053	0.0125349	0	0	9.30029	57.8886	CASP8;ADIPOQ;PRKCA;PTPN2
GO_Biological_Process_2021	regulation of superoxide anion generation (GO:0032928)	0.00198053	0.0125349	0	0	9.30029	57.8886	TGFB1;SYK;PRKCD;MAPT
GO_Biological_Process_2021	base-excision repair (GO:0006284)	0.00204582	0.0128864	0	0	4.37725	27.1038	POLB;FEN1;PCNA;PARP1;APEX1;XRCC1;POLL
GO_Biological_Process_2021	cellular response to ionizing radiation (GO:0071479)	0.00204582	0.0128864	0	0	4.37725	27.1038	BLM;RAD51;ATM;MAPK14;HRAS;TP53;RHOB
GO_Biological_Process_2021	positive regulation of DNA repair (GO:0045739)	0.00204582	0.0128864	0	0	4.37725	27.1038	PCNA;PARP1;CEBPG;XRCC1;HMGB1;BRCA1;EGFR
GO_Biological_Process_2021	regulation of JNK cascade (GO:0046328)	0.00206789	0.0130047	0	0	3.008	18.5931	APP;CYLD;RAP2A;COPS5;DUSP3;PHLPP1;TAOK3;TRAF2;HMGB1;HRAS;EGFR
GO_Biological_Process_2021	macrophage activation (GO:0042116)	0.00211211	0.0132408	0	0	5.12373	31.5625	APP;SYK;AZU1;MAPT;JAK2;TNF
GO_Biological_Process_2021	regulation of androgen receptor signaling pathway (GO:0060765)	0.00211211	0.0132408	0	0	5.12373	31.5625	AR;HDAC1;SAFB2;KLK3;KLK2;PKN1
GO_Biological_Process_2021	negative regulation of cell junction assembly (GO:1901889)	0.00215521	0.0134471	0	0	6.39947	39.2919	ROCK1;SRC;ROCK2;PTEN;TNF
GO_Biological_Process_2021	negative regulation of cellular carbohydrate metabolic process (GO:0010677)	0.00215521	0.0134471	0	0	6.39947	39.2919	ADIPOQ;MST1;PGP;PPARA;INS
GO_Biological_Process_2021	regulation of heterotypic cell-cell adhesion (GO:0034114)	0.00215521	0.0134471	0	0	6.39947	39.2919	IL10;LCK;ADIPOQ;TNF;SKAP1
GO_Biological_Process_2021	regulation of cell division (GO:0051302)	0.00222587	0.0138444	0	0	3.44848	21.062	BLM;PLK1;TXNIP;PIN1;PIK3C3;CALM2;RAB11A;NKX3-1;BCL2L1
GO_Biological_Process_2021	regulation of epithelial to mesenchymal transition (GO:0010717)	0.00222587	0.0138444	0	0	3.44848	21.062	PPP2CA;SPRED1;IL6;TGFB1;HPN;PTEN;TWIST1;CTNNB1;GATA3
GO_Biological_Process_2021	double-strand break repair via nonhomologous end joining (GO:0006303)	0.00223586	0.013863	0	0	3.80075	23.1965	POLB;DCLRE1A;DCLRE1C;ERCC1;POLL;ATM;HMGB1;BRCA1
GO_Biological_Process_2021	I-kappaB kinase/NF-kappaB signaling (GO:0007249)	0.00223586	0.013863	0	0	3.80075	23.1965	NFKBIA;ROCK1;ROCK2;AKT1;TRAF2;TAB1;TNF;RELA
GO_Biological_Process_2021	cellular component assembly (GO:0022607)	0.00227592	0.0140894	0	0	2.14268	13.039	NCKAP1;TGFB1;KMT2A;RHOG;RHOH;ILK;MITF;TRAF2;RHOD;RHOA;CDC42;RHOJ;RAC2;RAC3;RHOU;RAC1;RHOV;EZR;TP53;RHOQ
GO_Biological_Process_2021	positive regulation of transport (GO:0051050)	0.00228112	0.0140996	0	0	3.17132	19.2914	GSK3B;RXRA;LRP1;KMT2A;BAX;AZU1;SGK1;GATA2;TNF;BOK
GO_Biological_Process_2021	negative regulation of catabolic process (GO:0009895)	0.00231036	0.0142358	0	0	4.27281	25.9375	CYP51A1;PIN1;HMGCR;PPARA;TNF;EGFR;INS
GO_Biological_Process_2021	secondary alcohol metabolic process (GO:1902652)	0.00231036	0.0142358	0	0	4.27281	25.9375	CETP;RXRA;IDH1;FDX1;UGT1A4;UGT1A3;PPARD
GO_Biological_Process_2021	regulation of cell differentiation (GO:0045595)	0.00242876	0.0149421	0	0	2.53813	15.2805	CSF2;TGFB1;CBFB;ROCK1;RORC;GATA3;TNF;KLK6;INS;PPP2CA;AR;TRPS1;RPS6KA1;RAF1
GO_Biological_Process_2021	positive regulation of myeloid cell differentiation (GO:0045639)	0.0024416	0.0149515	0	0	4.95819	29.824	MAPK11;THPO;STAT3;MAPK14;HIF1A;GATA1
GO_Biological_Process_2021	regulation of erythrocyte differentiation (GO:0045646)	0.0024416	0.0149515	0	0	4.95819	29.824	LYN;MAPK11;STAT3;MAPK14;HIF1A;GATA1
GO_Biological_Process_2021	regulation of protein autophosphorylation (GO:0031952)	0.0024416	0.0149515	0	0	4.95819	29.824	RAP2C;RAP2A;ADIPOQ;CALM2;INS;VEGFA
GO_Biological_Process_2021	regulation of endothelial cell proliferation (GO:0001936)	0.00247471	0.0151309	0	0	3.13248	18.8	ATP5IF1;NRAS;ANGPT1;EGF;AKT1;PRKCA;PRKD1;F3;HIF1A;VEGFA
GO_Biological_Process_2021	enzyme linked receptor protein signaling pathway (GO:0007167)	0.0025368	0.0152881	0	0	2.63373	15.7414	LYN;PDGFRA;MUSK;SYK;SRC;PTPRF;EGFR;FGR;LCK;NPPA;ERBB2;JAK2;MET
GO_Biological_Process_2021	motor neuron axon guidance (GO:0008045)	0.00256239	0.0152881	0	0	8.52482	50.866	RHOG;RAC2;RHOH;RAC1
GO_Biological_Process_2021	negative regulation of anoikis (GO:2000811)	0.00256239	0.0152881	0	0	8.52482	50.866	PIK3CA;SRC;BCL2;MCL1
GO_Biological_Process_2021	negative regulation of platelet activation (GO:0010544)	0.00256239	0.0152881	0	0	8.52482	50.866	PDGFRA;NOS3;PRKCD;F2
GO_Biological_Process_2021	negative regulation of release of cytochrome c from mitochondria (GO:0090201)	0.00256239	0.0152881	0	0	8.52482	50.866	GPX1;HGF;AKT1;BCL2L1
GO_Biological_Process_2021	neuron projection organization (GO:0106027)	0.00256239	0.0152881	0	0	8.52482	50.866	APP;GSK3B;ARF1;INS
GO_Biological_Process_2021	regulation of cholesterol storage (GO:0010885)	0.00256239	0.0152881	0	0	8.52482	50.866	NR1H2;PPARG;PPARA;PPARD
GO_Biological_Process_2021	regulation of mast cell degranulation (GO:0043304)	0.00256239	0.0152881	0	0	8.52482	50.866	LYN;FGR;SYK;STXBP2
GO_Biological_Process_2021	positive regulation of glucose import (GO:0046326)	0.00258641	0.0152881	0	0	6.09441	36.3074	ADIPOQ;AKT1;PTPN11;RHOQ;INS
GO_Biological_Process_2021	regulation of biomineral tissue development (GO:0070167)	0.00258641	0.0152881	0	0	6.09441	36.3074	TGFB1;ROCK1;ROCK2;NOS3;TWIST1
GO_Biological_Process_2021	TOR signaling (GO:0031929)	0.00258641	0.0152881	0	0	6.09441	36.3074	RPS6KB1;NPRL3;AKT1;GATA3;RHEBL1
GO_Biological_Process_2021	organic hydroxy compound biosynthetic process (GO:1901617)	0.0026005	0.0152881	0	0	4.17322	24.8392	AMACR;HSD17B1;ALOX15;PMVK;PRKAG2;HMGCR;HSD17B10
GO_Biological_Process_2021	regulation of complement activation (GO:0030449)	0.0026005	0.0152881	0	0	4.17322	24.8392	C1S;C9;CFI;F2;C8A;CFB;C2
GO_Biological_Process_2021	cellular response to angiotensin (GO:1904385)	0.00261233	0.0152881	0	0	15.3299	91.1747	PRKCD;RELA;NFKB1
GO_Biological_Process_2021	DNA damage induced protein phosphorylation (GO:0006975)	0.00261233	0.0152881	0	0	15.3299	91.1747	CHEK1;ATM;MAPK12
GO_Biological_Process_2021	entry of bacterium into host cell (GO:0035635)	0.00261233	0.0152881	0	0	15.3299	91.1747	SRC;CTNNB1;MET
GO_Biological_Process_2021	ER overload response (GO:0006983)	0.00261233	0.0152881	0	0	15.3299	91.1747	GSK3B;DDIT3;TP53
GO_Biological_Process_2021	negative regulation by symbiont of host apoptotic process (GO:0033668)	0.00261233	0.0152881	0	0	15.3299	91.1747	MAPK1;CTSG;BCL2L1
GO_Biological_Process_2021	negative regulation of amyloid-beta clearance (GO:1900222)	0.00261233	0.0152881	0	0	15.3299	91.1747	CYP51A1;HMGCR;TNF
GO_Biological_Process_2021	negative regulation of regulated secretory pathway (GO:1903306)	0.00261233	0.0152881	0	0	15.3299	91.1747	RAP1B;RAP1A;STXBP3
GO_Biological_Process_2021	positive regulation of cell migration by vascular endothelial growth factor signaling pathway (GO:0038089)	0.00261233	0.0152881	0	0	15.3299	91.1747	HSPB1;PRKD1;VEGFA
GO_Biological_Process_2021	positive regulation of defense response to bacterium (GO:1900426)	0.00261233	0.0152881	0	0	15.3299	91.1747	KLK5;KLK3;KLK7
GO_Biological_Process_2021	positive regulation of monocyte chemotactic protein-1 production (GO:0071639)	0.00261233	0.0152881	0	0	15.3299	91.1747	SYK;ADIPOQ;TWIST1
GO_Biological_Process_2021	positive regulation of protein localization to early endosome (GO:1902966)	0.00261233	0.0152881	0	0	15.3299	91.1747	EGF;ROCK2;EZR
GO_Biological_Process_2021	positive regulation of protein localization to endosome (GO:1905668)	0.00261233	0.0152881	0	0	15.3299	91.1747	EGF;ROCK2;EZR
GO_Biological_Process_2021	regulation of apoptotic cell clearance (GO:2000425)	0.00261233	0.0152881	0	0	15.3299	91.1747	HMGB1;TGM2;C2
GO_Biological_Process_2021	regulation of protein localization to early endosome (GO:1902965)	0.00261233	0.0152881	0	0	15.3299	91.1747	EGF;ROCK2;EZR
GO_Biological_Process_2021	stress-induced premature senescence (GO:0090400)	0.00261233	0.0152881	0	0	15.3299	91.1747	MAPKAPK5;MAPK14;TP53
GO_Biological_Process_2021	T-helper cell lineage commitment (GO:0002295)	0.00261233	0.0152881	0	0	15.3299	91.1747	IL6;STAT3;BATF
GO_Biological_Process_2021	positive regulation of peptidyl-serine phosphorylation (GO:0033138)	0.00268125	0.0156683	0	0	3.09458	18.3244	APP;IL6;TGFB1;IFNB1;AKT1;PRKD1;RAF1;TNF;EGFR;VEGFA
GO_Biological_Process_2021	diterpenoid metabolic process (GO:0016101)	0.0027402	0.0159657	0	0	3.66463	21.6203	PECR;AKR1B10;LRP1;RDH11;RDH10;ALDH1A1;SDC3;AKR1B1
GO_Biological_Process_2021	regulation of extrinsic apoptotic signaling pathway (GO:2001236)	0.0027402	0.0159657	0	0	3.66463	21.6203	AR;CYLD;CASP8;SRC;TRAF2;TNF;RELA;BCL2L14
GO_Biological_Process_2021	negative regulation of endothelial cell migration (GO:0010596)	0.00280825	0.0163142	0	0	4.803	28.2186	ANGPT4;TGFB1;ANGPT2;PPARG;HMGB1;TNF
GO_Biological_Process_2021	response to estradiol (GO:0032355)	0.00280825	0.0163142	0	0	4.803	28.2186	TGFB1;STAT3;CTNNB1;CYP19A1;ESR1;EGFR
GO_Biological_Process_2021	hemopoiesis (GO:0030097)	0.00290135	0.0168304	0	0	3.05758	17.8641	IL10;CSF2;TGFB1;PTPRC;KMT2A;RRAS;LCK;ASH2L;CDK13;TP53
GO_Biological_Process_2021	DNA duplex unwinding (GO:0032508)	0.00291782	0.0168519	0	0	4.07816	23.8039	BLM;RAD51;MCM7;PARP1;MCM9;RECQL;MCM2
GO_Biological_Process_2021	negative regulation of transport (GO:0051051)	0.00291782	0.0168519	0	0	4.07816	23.8039	EGF;NR1H2;ADIPOQ;PTEN;PRTN3;PRKD1;PPM1F
GO_Biological_Process_2021	regulation of epithelial cell migration (GO:0010632)	0.00291782	0.0168519	0	0	4.07816	23.8039	MACF1;RAB25;SRC;RHOJ;HIF1A;PPM1F;RAB11A
GO_Biological_Process_2021	protein deubiquitination (GO:0016579)	0.00295731	0.0170551	0	0	2.08997	12.1709	USP2;PTEN;KEAP1;NEDD8;TRAF2;GATA3;BRCA1;HIF1A;ESR1;RHOA;NFKBIA;POLB;AR;CYLD;KAT2A;COPS5;USP1;NLRP3;TAB1;TP53
GO_Biological_Process_2021	response to endoplasmic reticulum stress (GO:0034976)	0.0029877	0.0172053	0	0	2.85533	16.5988	GSK3B;MBTPS1;JUN;CXCL8;DDIT3;ALOX15;ITPR1;BCL2;BAX;TRAF2;TP53
GO_Biological_Process_2021	cellular senescence (GO:0090398)	0.00307685	0.0175655	0	0	5.81709	33.6452	MAP2K1;PRKCD;MAPKAPK5;MAPK14;HRAS
GO_Biological_Process_2021	positive regulation of erythrocyte differentiation (GO:0045648)	0.00307685	0.0175655	0	0	5.81709	33.6452	MAPK11;STAT3;MAPK14;HIF1A;GATA1
GO_Biological_Process_2021	positive regulation of muscle cell differentiation (GO:0051149)	0.00307685	0.0175655	0	0	5.81709	33.6452	CDC42;MAPK11;CTNNB1;MAPK14;MAPK12
GO_Biological_Process_2021	regulation of cell junction assembly (GO:1901888)	0.00307685	0.0175655	0	0	5.81709	33.6452	RAP1B;RAP1A;ROCK1;CBFB;ROCK2
GO_Biological_Process_2021	regulation of transcription regulatory region DNA binding (GO:2000677)	0.00307685	0.0175655	0	0	5.81709	33.6452	RB1;TGFB1;TWIST1;GATA3;GATA1
GO_Biological_Process_2021	regulation of vasculature development (GO:1901342)	0.00307685	0.0175655	0	0	5.81709	33.6452	IL6;ERBB2;HMOX1;CTNNB1;CXCL13
GO_Biological_Process_2021	cellular response to ketone (GO:1901655)	0.0032146	0.0182137	0	0	4.65721	26.7326	AR;NDOR1;SRC;ROCK2;AHR;NR3C1
GO_Biological_Process_2021	membrane protein proteolysis (GO:0033619)	0.0032146	0.0182137	0	0	4.65721	26.7326	MBTPS1;TGFB1;TMPRSS6;PRTN3;RELA;NFKB1
GO_Biological_Process_2021	regulation of protein targeting to mitochondrion (GO:1903214)	0.0032146	0.0182137	0	0	4.65721	26.7326	ATP5IF1;LRRK2;CSNK2A2;RAC2;RHOU;SAE1
GO_Biological_Process_2021	acyl-CoA biosynthetic process (GO:0071616)	0.00325158	0.0182137	0	0	7.86866	45.0765	ACLY;FASN;HSD17B8;CBR4
GO_Biological_Process_2021	dolichol-linked oligosaccharide biosynthetic process (GO:0006488)	0.00325158	0.0182137	0	0	7.86866	45.0765	DOLPP1;ALG2;MVD;ALG1
GO_Biological_Process_2021	negative regulation of fatty acid metabolic process (GO:0045922)	0.00325158	0.0182137	0	0	7.86866	45.0765	SIRT4;BRCA1;UGT1A8;INS
GO_Biological_Process_2021	negative regulation of vascular associated smooth muscle cell proliferation (GO:1904706)	0.00325158	0.0182137	0	0	7.86866	45.0765	IL10;ADIPOQ;PTEN;PPARG
GO_Biological_Process_2021	positive regulation of cyclin-dependent protein serine/threonine kinase activity (GO:0045737)	0.00325158	0.0182137	0	0	7.86866	45.0765	CCND1;AKT1;MAPRE3;EGFR
GO_Biological_Process_2021	positive regulation of cytokine production involved in inflammatory response (GO:1900017)	0.00325158	0.0182137	0	0	7.86866	45.0765	IL6;STAT3;TNF;HIF1A
GO_Biological_Process_2021	positive regulation of DNA replication (GO:0045740)	0.00325158	0.0182137	0	0	7.86866	45.0765	PCNA;ATAD5;EGF;EGFR
GO_Biological_Process_2021	positive regulation of muscle hypertrophy (GO:0014742)	0.00325158	0.0182137	0	0	7.86866	45.0765	ROCK1;PARP1;ROCK2;PRKCA
GO_Biological_Process_2021	protein autoprocessing (GO:0016540)	0.00325158	0.0182137	0	0	7.86866	45.0765	F12;CASP1;TMPRSS2;KLK6
GO_Biological_Process_2021	protein heterooligomerization (GO:0051291)	0.00325158	0.0182137	0	0	7.86866	45.0765	NUDT21;MAT2A;HSD17B8;CBR4
GO_Biological_Process_2021	myeloid cell differentiation (GO:0030099)	0.00326395	0.0182137	0	0	3.98733	22.8267	ATP5IF1;LYN;CSF2;CASP3;JAK2;GATA1;PTPN2
GO_Biological_Process_2021	negative regulation of protein metabolic process (GO:0051248)	0.00326395	0.0182137	0	0	3.98733	22.8267	ROCK1;CYP51A1;PIN1;HMGCR;EGFR;NFKB1;INS
GO_Biological_Process_2021	response to peptide hormone (GO:0043434)	0.00326395	0.0182137	0	0	3.98733	22.8267	CELA2A;ROCK1;ROCK2;SRC;STAT3;AKT1;EIF2B1
GO_Biological_Process_2021	positive regulation of cell death (GO:0010942)	0.00332918	0.0185516	0	0	3.53789	20.1838	GSK3B;LRP1;LRRK2;HP;MAPT;HPR;TNF;NKX3-1
GO_Biological_Process_2021	plasma membrane bounded cell projection organization (GO:0120036)	0.00337749	0.0187944	0	0	2.65962	15.1349	RB1;LYN;APP;GSK3B;IL6;ROCK1;RAB25;STMN4;HMGB1;RAC1;MAPT;RAB11A
GO_Biological_Process_2021	negative regulation of protein modification process (GO:0031400)	0.00345096	0.0191763	0	0	3.20817	18.1874	LYN;GSK3B;PRKAA2;TGFB1;LRRK2;PTEN;XRCC1;MAPT;PLPP3
GO_Biological_Process_2021	regulation of canonical Wnt signaling pathway (GO:0060828)	0.00360978	0.0200053	0	0	2.09437	11.7789	GSK3B;TGFB1;CSNK1A1;HDAC1;EGF;CUL3;LRRK2;PPM1N;NOG;ILK;EGFR;NFKB1;CYLD;PPM1A;PPM1B;DDIT3;CTNNB1;PIN1;EMD
GO_Biological_Process_2021	bile acid and bile salt transport (GO:0015721)	0.00363093	0.0200053	0	0	5.56389	31.2594	SLCO1B1;RXRA;SLC10A1;SLCO1B3;NR1H4
GO_Biological_Process_2021	cellular response to epidermal growth factor stimulus (GO:0071364)	0.00363093	0.0200053	0	0	5.56389	31.2594	DUSP3;PDPK1;ERBB2;PTPN11;EGFR
GO_Biological_Process_2021	positive regulation of cell communication (GO:0010647)	0.00363093	0.0200053	0	0	5.56389	31.2594	ADIPOQ;NMU;ILK;GATA3;TNF
GO_Biological_Process_2021	positive regulation of phosphatidylinositol 3-kinase activity (GO:0043552)	0.00363093	0.0200053	0	0	5.56389	31.2594	P2RY12;FGR;PDGFRA;TGFB1;PRKD1
GO_Biological_Process_2021	regulation of microtubule polymerization or depolymerization (GO:0031110)	0.00363093	0.0200053	0	0	5.56389	31.2594	STMN4;MAPRE3;MAPT;MAPRE1;MAPRE2
GO_Biological_Process_2021	positive regulation of NIK/NF-kappaB signaling (GO:1901224)	0.00364053	0.0200053	0	0	3.90045	21.9034	APP;PTP4A3;ILK;TNF;RHOA;RELA;EGFR
GO_Biological_Process_2021	regulation of immune effector process (GO:0002697)	0.00364053	0.0200053	0	0	3.90045	21.9034	C1S;C9;CFI;F2;C8A;CFB;C2
GO_Biological_Process_2021	negative regulation of ERBB signaling pathway (GO:1901185)	0.00366319	0.0200741	0	0	4.52	25.3546	CDC42;DUSP3;EGF;ERBB2;EGFR;PTPN2
GO_Biological_Process_2021	regulation of microtubule polymerization (GO:0031113)	0.00366319	0.0200741	0	0	4.52	25.3546	DYRK1A;MAPRE3;RAC1;MAPT;MAPRE1;MET
GO_Biological_Process_2021	regulation of cyclin-dependent protein serine/threonine kinase activity (GO:0000079)	0.00374966	0.0204912	0	0	3.16405	17.6747	DIRAS3;CCNB2;BLM;CCND1;PLK1;PTEN;AKT1;MAPRE3;EGFR
GO_Biological_Process_2021	regulation of G protein-coupled receptor signaling pathway (GO:0008277)	0.00374966	0.0204912	0	0	3.16405	17.6747	RGS4;CXCL8;ROCK1;ROCK2;KLK5;KLK14;PPEF1;MGLL;KLK6
GO_Biological_Process_2021	histone phosphorylation (GO:0016572)	0.0038089	0.0205039	0	0	12.7742	71.1578	RPS6KA5;PRKCD;CDK2
GO_Biological_Process_2021	negative regulation of fibrinolysis (GO:0051918)	0.0038089	0.0205039	0	0	12.7742	71.1578	SERPINE1;PLG;F2
GO_Biological_Process_2021	positive regulation of blood vessel endothelial cell proliferation involved in sprouting angiogenesis (GO:1903589)	0.0038089	0.0205039	0	0	12.7742	71.1578	HMOX1;GATA2;VEGFA
GO_Biological_Process_2021	quaternary ammonium group transport (GO:0015697)	0.0038089	0.0205039	0	0	12.7742	71.1578	SLC25A48;SLC25A29;SLC25A45
GO_Biological_Process_2021	regulation of DNA-templated transcription in response to stress (GO:0043620)	0.0038089	0.0205039	0	0	12.7742	71.1578	DDIT3;RPS6KA1;RELA
GO_Biological_Process_2021	regulation of endothelial cell development (GO:1901550)	0.0038089	0.0205039	0	0	12.7742	71.1578	ROCK1;ROCK2;TNF
GO_Biological_Process_2021	regulation of leukocyte degranulation (GO:0043300)	0.0038089	0.0205039	0	0	12.7742	71.1578	LYN;SYK;STXBP2
GO_Biological_Process_2021	regulation of lipid transport (GO:0032368)	0.0038089	0.0205039	0	0	12.7742	71.1578	LRP1;NR1H2;PPARA
GO_Biological_Process_2021	regulation of mammary gland epithelial cell proliferation (GO:0033599)	0.0038089	0.0205039	0	0	12.7742	71.1578	GPX1;MST1;GATA3
GO_Biological_Process_2021	regulation of respiratory burst (GO:0060263)	0.0038089	0.0205039	0	0	12.7742	71.1578	RAC2;RAC1;INS
GO_Biological_Process_2021	regulation of transmembrane transporter activity (GO:0022898)	0.0038089	0.0205039	0	0	12.7742	71.1578	BCL2;PIM1;INS
GO_Biological_Process_2021	activation of protein kinase activity (GO:0032147)	0.00393917	0.0211764	0	0	2.74387	15.1922	ANGPT1;TAOK3;PDPK1;PRKACG;PRKCD;AKT1;TRAF2;COPS8;JAK2;INS;VEGFA
GO_Biological_Process_2021	regulation of myeloid cell differentiation (GO:0045637)	0.0040119	0.0215381	0	0	3.41961	18.8711	LYN;NFE2;CSF2;CBFB;KMT2A;HDAC1;ASH2L;GATA1
GO_Biological_Process_2021	regulation of megakaryocyte differentiation (GO:0045652)	0.00404925	0.0215754	0	0	3.81726	21.0301	NFE2;CBFB;KMT2A;THPO;HDAC1;ASH2L;GATA1
GO_Biological_Process_2021	DNA conformation change (GO:0071103)	0.00405697	0.0215754	0	0	7.30623	40.2377	TOP2A;TOP2B;HMGB1;TOP1
GO_Biological_Process_2021	intracellular estrogen receptor signaling pathway (GO:0030520)	0.00405697	0.0215754	0	0	7.30623	40.2377	AR;SAFB;ESR1;ESR2
GO_Biological_Process_2021	positive regulation of cardiac muscle hypertrophy (GO:0010613)	0.00405697	0.0215754	0	0	7.30623	40.2377	ROCK1;PARP1;ROCK2;PRKCA
GO_Biological_Process_2021	regulation of early endosome to late endosome transport (GO:2000641)	0.00405697	0.0215754	0	0	7.30623	40.2377	MAP2K1;SRC;MAPK1;EZR
GO_Biological_Process_2021	regulation of vascular endothelial cell proliferation (GO:1905562)	0.00405697	0.0215754	0	0	7.30623	40.2377	PDPK1;SP1;PPARG;HMGB1
GO_Biological_Process_2021	release of cytochrome c from mitochondria (GO:0001836)	0.00405697	0.0215754	0	0	7.30623	40.2377	BCL2;BAX;BCL2L1;BOK
GO_Biological_Process_2021	positive regulation of plasma membrane bounded cell projection assembly (GO:0120034)	0.00406824	0.0216064	0	0	3.12113	17.1804	CDC42;P2RY12;NCKAP1;RALA;PIK3CA;RAC2;RAC1;HRAS;RHOQ
GO_Biological_Process_2021	regulation of response to DNA damage stimulus (GO:2001020)	0.0041566	0.0220166	0	0	4.39063	24.0741	PRKCD;USP1;MAPT;POLH;NKX3-1;MCL1
GO_Biological_Process_2021	response to growth factor (GO:0070848)	0.0041566	0.0220166	0	0	4.39063	24.0741	RPS6KB1;ERBB2;GATA6;AKT1;CTNNB1;EMD
GO_Biological_Process_2021	positive regulation of protein metabolic process (GO:0051247)	0.00421123	0.0222762	0	0	2.71735	14.8639	NFKBIA;APP;GSK3B;TGFB1;CSNK2A1;ROCK2;NR1H2;AKT1;TNF;FOXO1;INS
GO_Biological_Process_2021	intrinsic apoptotic signaling pathway in response to endoplasmic reticulum stress (GO:0070059)	0.00425306	0.0222892	0	0	5.33178	29.1121	DDIT3;ITPR1;BCL2;BAX;TRAF2
GO_Biological_Process_2021	negative regulation of epithelial to mesenchymal transition (GO:0010719)	0.00425306	0.0222892	0	0	5.33178	29.1121	PPP2CA;SPRED1;HPN;PTEN;GATA3
GO_Biological_Process_2021	negative regulation of transferase activity (GO:0051348)	0.00425306	0.0222892	0	0	5.33178	29.1121	GSK3B;BAG5;SRC;MAPT;TP53
GO_Biological_Process_2021	positive regulation of dephosphorylation (GO:0035306)	0.00425306	0.0222892	0	0	5.33178	29.1121	TGFB1;SRC;PRKCD;PIN1;CALM2
GO_Biological_Process_2021	positive regulation of leukocyte migration (GO:0002687)	0.00425306	0.0222892	0	0	5.33178	29.1121	F7;IL6;TNF;ICAM1;VEGFA
GO_Biological_Process_2021	regulation of fatty acid biosynthetic process (GO:0042304)	0.00425306	0.0222892	0	0	5.33178	29.1121	PRKAA2;NR1H2;ADIPOQ;PRKAG2;BRCA1
GO_Biological_Process_2021	regulation of gluconeogenesis (GO:0006111)	0.00425306	0.0222892	0	0	5.33178	29.1121	ADIPOQ;MST1;PGP;PTPN2;INS
GO_Biological_Process_2021	cell chemotaxis (GO:0060326)	0.00439135	0.0229835	0	0	3.36337	18.2568	PDGFRA;CCL20;HGF;PRKCD;RHOG;CXCR4;AZU1;VEGFA
GO_Biological_Process_2021	axon guidance (GO:0007411)	0.00456572	0.0238646	0	0	2.20344	11.8747	GRB7;SRC;LAMA1;RHOG;RHOH;CXCR4;PRKCA;PTPN11;VEGFA;RPS6KA5;PIK3CA;PTPRA;RAC2;MAPK1;RAC1;EZR
GO_Biological_Process_2021	regulation of chemokine production (GO:0032642)	0.00469742	0.0245206	0	0	4.26844	22.882	APP;IL6;HMOX1;TNF;HIF1A;ELANE
GO_Biological_Process_2021	G1/S transition of mitotic cell cycle (GO:0000082)	0.00476856	0.0248593	0	0	3.03868	16.2439	RB1;DHFR;PCNA;CDC45;CCND1;RPS6KB1;CDK4;CUL3;CDK2
GO_Biological_Process_2021	carbohydrate homeostasis (GO:0033500)	0.0047978	0.0249788	0	0	3.30895	17.6685	IL6;PRKAA2;ADIPOQ;STAT3;PPARG;SLC2A4;PTPN2;INS
GO_Biological_Process_2021	epithelial cell differentiation (GO:0030855)	0.00487563	0.0253507	0	0	2.82135	15.0195	CBR1;BDH2;PCNA;HDAC1;GATA6;AKT1;VDAC1;PPARG;GATA3;VEGFA
GO_Biological_Process_2021	fatty-acyl-CoA biosynthetic process (GO:0046949)	0.00494759	0.0256274	0	0	5.11824	27.172	ACLY;FASN;HSD17B8;ACSF3;CBR4
GO_Biological_Process_2021	fatty acid transmembrane transport (GO:1902001)	0.00498706	0.0256274	0	0	6.81879	36.1458	PRKAA2;PRKAG2;SLC25A20;ACACB
GO_Biological_Process_2021	positive regulation of focal adhesion assembly (GO:0051894)	0.00498706	0.0256274	0	0	6.81879	36.1458	ROCK1;RAC1;PPM1F;VEGFA
GO_Biological_Process_2021	pyroptosis (GO:0070269)	0.00498706	0.0256274	0	0	6.81879	36.1458	CASP8;GZMA;CASP1;GZMB
GO_Biological_Process_2021	regulation of bicellular tight junction assembly (GO:2000810)	0.00498706	0.0256274	0	0	6.81879	36.1458	ROCK1;CBFB;ROCK2;TNF
GO_Biological_Process_2021	regulation of collagen biosynthetic process (GO:0032965)	0.00498706	0.0256274	0	0	6.81879	36.1458	IL6;TGFB1;F2;LARP6
GO_Biological_Process_2021	regulation of leukocyte chemotaxis (GO:0002688)	0.00498706	0.0256274	0	0	6.81879	36.1458	LYN;F7;IL6;MST1
GO_Biological_Process_2021	regulation of neuroinflammatory response (GO:0150077)	0.00498706	0.0256274	0	0	6.81879	36.1458	IL6;PTGS2;TNF;MMP9
GO_Biological_Process_2021	regulation of synaptic vesicle exocytosis (GO:2000300)	0.00498706	0.0256274	0	0	6.81879	36.1458	RAP1B;GSK3B;RAP1A;LRRK2
GO_Biological_Process_2021	regulation of G1/S transition of mitotic cell cycle (GO:2000045)	0.00523246	0.0266963	0	0	3.25626	17.1047	RB1;RBL2;CCND1;CDK4;PTEN;AKT1;PTPN6;EGFR
GO_Biological_Process_2021	cellular response to glucose starvation (GO:0042149)	0.00528826	0.0266963	0	0	4.15286	21.7704	PRKAA2;PRKAG1;PRKAG2;PIK3C3;TP53;PRKAG3
GO_Biological_Process_2021	positive regulation of phospholipase C activity (GO:0010863)	0.00528826	0.0266963	0	0	4.15286	21.7704	P2RY12;PDGFRA;HRAS;SELE;ESR1;EGFR
GO_Biological_Process_2021	cellular response to dopamine (GO:1903351)	0.0052894	0.0266963	0	0	10.9488	57.394	LRRK2;MAPK1;TGM2
GO_Biological_Process_2021	endothelial tube morphogenesis (GO:0061154)	0.0052894	0.0266963	0	0	10.9488	57.394	CTNNB1;RHOA;RHOB
GO_Biological_Process_2021	myeloid dendritic cell differentiation (GO:0043011)	0.0052894	0.0266963	0	0	10.9488	57.394	CSF2;DHRS2;BATF
GO_Biological_Process_2021	negative regulation of cell-cell adhesion mediated by cadherin (GO:2000048)	0.0052894	0.0266963	0	0	10.9488	57.394	PLG;PPM1F;VEGFA
GO_Biological_Process_2021	positive regulation of coagulation (GO:0050820)	0.0052894	0.0266963	0	0	10.9488	57.394	F12;SERPINE1;F2
GO_Biological_Process_2021	positive regulation of hemostasis (GO:1900048)	0.0052894	0.0266963	0	0	10.9488	57.394	F12;SERPINE1;F2
GO_Biological_Process_2021	regulation of receptor binding (GO:1900120)	0.0052894	0.0266963	0	0	10.9488	57.394	ADIPOQ;MMP9;PTPRF
GO_Biological_Process_2021	regulation of RNA polymerase II transcription preinitiation complex assembly (GO:0045898)	0.0052894	0.0266963	0	0	10.9488	57.394	HMGB1;ESR1;TP53
GO_Biological_Process_2021	response to dopamine (GO:1903350)	0.0052894	0.0266963	0	0	10.9488	57.394	LRRK2;MAPK1;TGM2
GO_Biological_Process_2021	telomere maintenance in response to DNA damage (GO:0043247)	0.0052894	0.0266963	0	0	10.9488	57.394	DCLRE1A;DCLRE1C;APEX1
GO_Biological_Process_2021	UV protection (GO:0009650)	0.0052894	0.0266963	0	0	10.9488	57.394	FEN1;GPX1;CAT
GO_Biological_Process_2021	negative regulation of inflammatory response to antigenic stimulus (GO:0002862)	0.00550267	0.0277374	0	0	2.48699	12.9386	LYN;IL10;FGR;IL6;PTGIR;SYK;SRC;PRKACG;GPBAR1;PTH1R;MAPK14;TSHR
GO_Biological_Process_2021	negative regulation of angiogenesis (GO:0016525)	0.00555914	0.0279864	0	0	2.96046	15.3716	ANGPT4;SPRED1;ROCK1;ROCK2;SERPINE1;CTNNB1;PPARG;KLK3;TNF
GO_Biological_Process_2021	negative regulation of DNA binding (GO:0043392)	0.00571883	0.0287174	0	0	4.92113	25.4127	NFKBIA;JUN;GZMA;JAK2;GATA1
GO_Biological_Process_2021	negative regulation of peptidyl-tyrosine phosphorylation (GO:0050732)	0.00571883	0.0287174	0	0	4.92113	25.4127	PPP2CA;PTPRC;PRKCD;PTPN6;PTPN2
GO_Biological_Process_2021	regulation of inflammatory response to antigenic stimulus (GO:0002861)	0.00582991	0.0292381	0	0	2.46697	12.6919	LYN;IL10;FGR;IL6;PTGIR;SYK;SRC;PRKACG;GPBAR1;PTH1R;MAPK14;TSHR
GO_Biological_Process_2021	positive regulation of stress fiber assembly (GO:0051496)	0.00593171	0.0296735	0	0	4.04337	20.7321	CDC42;ROCK2;RAC1;PPM1E;PPM1F;RHOA
GO_Biological_Process_2021	response to amyloid-beta (GO:1904645)	0.00593171	0.0296735	0	0	4.04337	20.7321	APP;GSK3B;LRP1;MMP2;MMP9;ICAM1
GO_Biological_Process_2021	establishment of epithelial cell polarity (GO:0090162)	0.00604997	0.0300376	0	0	6.39229	32.6499	CDC42;RAP2A;EZR;RHOA
GO_Biological_Process_2021	granulocyte differentiation (GO:0030851)	0.00604997	0.0300376	0	0	6.39229	32.6499	RXRA;CDK4;CDK2;GATA1
GO_Biological_Process_2021	growth hormone receptor signaling pathway (GO:0060396)	0.00604997	0.0300376	0	0	6.39229	32.6499	LYN;PTPN1;STAT3;JAK2
GO_Biological_Process_2021	myeloid cell development (GO:0061515)	0.00604997	0.0300376	0	0	6.39229	32.6499	APP;THPO;SRC;GATA1
GO_Biological_Process_2021	positive regulation of cyclin-dependent protein kinase activity (GO:1904031)	0.00604997	0.0300376	0	0	6.39229	32.6499	CCND1;AKT1;MAPRE3;EGFR
GO_Biological_Process_2021	positive regulation of G2/M transition of mitotic cell cycle (GO:0010971)	0.00604997	0.0300376	0	0	6.39229	32.6499	CCND1;CDK4;RAB11A;CDC25B
GO_Biological_Process_2021	defense response to Gram-negative bacterium (GO:0050829)	0.00619134	0.0306626	0	0	3.15574	16.0457	IL6;NOS2;SERPINE1;CTSG;RNASE3;AZU1;F2;ELANE
GO_Biological_Process_2021	negative regulation of cell adhesion (GO:0007162)	0.00619134	0.0306626	0	0	3.15574	16.0457	TGFB1;PTPRC;ANGPT1;SERPINE1;CYP1B1;PLG;RHOA;RND1
GO_Biological_Process_2021	nucleotide-excision repair (GO:0006289)	0.00640422	0.0316773	0	0	2.70199	13.6472	POLB;COPS5;PCNA;PARP1;ERCC1;XRCC1;POLL;POLK;COPS8;TP53
GO_Biological_Process_2021	second-messenger-mediated signaling (GO:0019932)	0.00644733	0.0318508	0	0	2.88614	14.558	PPP2CA;P2RY12;CXCL8;NOS2;PDPK1;NOS3;LRRK2;CXCR4;SELE
GO_Biological_Process_2021	positive regulation of response to external stimulus (GO:0032103)	0.00653061	0.032222	0	0	2.42786	12.2152	NFKBIA;P2RY12;APP;TGFB1;IFNB1;SERPINE1;PRKCA;PLG;F2;TNF;PPM1F;MAPK13
GO_Biological_Process_2021	positive regulation of glucose transmembrane transport (GO:0010828)	0.00657103	0.0322608	0	0	4.73862	23.812	ADIPOQ;AKT1;PTPN11;RHOQ;INS
GO_Biological_Process_2021	positive regulation of receptor signaling pathway via STAT (GO:1904894)	0.00657103	0.0322608	0	0	4.73862	23.812	IL10;IL6;CYP1B1;F2;TNF
GO_Biological_Process_2021	positive regulation of telomere maintenance (GO:0032206)	0.00657103	0.0322608	0	0	4.73862	23.812	ERCC1;MAPK1;MAPKAPK5;ATM;MAPK15
GO_Biological_Process_2021	regulation of cellular amide metabolic process (GO:0034248)	0.00657103	0.0322608	0	0	4.73862	23.812	APP;ROCK1;PRKCD;NR1H4;MAPKAPK5
GO_Biological_Process_2021	regulation of DNA repair (GO:0006282)	0.00663038	0.0324923	0	0	3.93949	19.7608	PCNA;CEBPG;USP1;BRCA1;EGFR;POLH
GO_Biological_Process_2021	positive regulation of tyrosine phosphorylation of STAT protein (GO:0042531)	0.00663459	0.0324923	0	0	3.44932	17.2999	LYN;IL6;CSF2;STAT3;JAK2;TNF;VEGFA
GO_Biological_Process_2021	regulation of stress fiber assembly (GO:0051492)	0.00671806	0.0328604	0	0	3.10776	15.548	CDC42;ROCK1;ROCK2;RAC1;MET;PPM1E;RHOA;PPM1F
GO_Biological_Process_2021	calcineurin-NFAT signaling cascade (GO:0033173)	0.00707032	0.0338726	0	0	9.57968	47.4371	PPP3CA;PPP3CB;PPP3CC
GO_Biological_Process_2021	columnar/cuboidal epithelial cell differentiation (GO:0002065)	0.00707032	0.0338726	0	0	9.57968	47.4371	GATA6;GATA5;GATA4
GO_Biological_Process_2021	cyclooxygenase pathway (GO:0019371)	0.00707032	0.0338726	0	0	9.57968	47.4371	CBR1;PTGS2;PTGS1
GO_Biological_Process_2021	induction of positive chemotaxis (GO:0050930)	0.00707032	0.0338726	0	0	9.57968	47.4371	CXCL8;AZU1;VEGFA
GO_Biological_Process_2021	PERK-mediated unfolded protein response (GO:0036499)	0.00707032	0.0338726	0	0	9.57968	47.4371	CXCL8;DDIT3;NFE2L2
GO_Biological_Process_2021	positive regulation of bone resorption (GO:0045780)	0.00707032	0.0338726	0	0	9.57968	47.4371	SYK;ATP6AP1;PRKCA
GO_Biological_Process_2021	positive regulation of macrophage differentiation (GO:0045651)	0.00707032	0.0338726	0	0	9.57968	47.4371	TGFB1;CASP8;PRKCA
GO_Biological_Process_2021	regulation of histone H3-K9 acetylation (GO:2000615)	0.00707032	0.0338726	0	0	9.57968	47.4371	KMT2A;CHEK1;BRCA1
GO_Biological_Process_2021	regulation of lipid kinase activity (GO:0043550)	0.00707032	0.0338726	0	0	9.57968	47.4371	RB1;RBL2;F2
GO_Biological_Process_2021	regulation of mitochondrial depolarization (GO:0051900)	0.00707032	0.0338726	0	0	9.57968	47.4371	SRC;LRRK2;BCL2
GO_Biological_Process_2021	regulation of monocyte chemotactic protein-1 production (GO:0071637)	0.00707032	0.0338726	0	0	9.57968	47.4371	SYK;ADIPOQ;TWIST1
GO_Biological_Process_2021	regulation of myeloid leukocyte mediated immunity (GO:0002886)	0.00707032	0.0338726	0	0	9.57968	47.4371	LYN;SYK;STXBP2
GO_Biological_Process_2021	regulation of stress-activated protein kinase signaling cascade (GO:0070302)	0.00707032	0.0338726	0	0	9.57968	47.4371	LYN;MAP2K1;MAPK1
GO_Biological_Process_2021	regulation of T-helper 2 cell cytokine production (GO:2000551)	0.00707032	0.0338726	0	0	9.57968	47.4371	IL6;IFNB1;NLRP3
GO_Biological_Process_2021	response to corticosteroid (GO:0031960)	0.00707032	0.0338726	0	0	9.57968	47.4371	IL10;IL6;TNF
GO_Biological_Process_2021	response to sterol (GO:0036314)	0.00707032	0.0338726	0	0	9.57968	47.4371	TGFB1;PMVK;RORC
GO_Biological_Process_2021	tetrahydrobiopterin metabolic process (GO:0046146)	0.00707032	0.0338726	0	0	9.57968	47.4371	DHFR;NOS3;AKT1
GO_Biological_Process_2021	calcium-mediated signaling using intracellular calcium source (GO:0035584)	0.00725339	0.0343345	0	0	6.01596	29.6363	PTPRC;CCL20;FKBP1B;AZU1
GO_Biological_Process_2021	cellular response to steroid hormone stimulus (GO:0071383)	0.00725339	0.0343345	0	0	6.01596	29.6363	AR;SRC;NR3C1;NKX3-1
GO_Biological_Process_2021	negative regulation of protein localization to plasma membrane (GO:1903077)	0.00725339	0.0343345	0	0	6.01596	29.6363	TGFB1;CSK;RHOQ;BCL2L1
GO_Biological_Process_2021	positive regulation of glycolytic process (GO:0045821)	0.00725339	0.0343345	0	0	6.01596	29.6363	APP;PRKAA2;HIF1A;INS
GO_Biological_Process_2021	positive regulation of purine nucleotide metabolic process (GO:1900544)	0.00725339	0.0343345	0	0	6.01596	29.6363	APP;PRKAA2;HIF1A;INS
GO_Biological_Process_2021	positive regulation of transcription from RNA polymerase II promoter involved in cellular response to chemical stimulus (GO:1901522)	0.00725339	0.0343345	0	0	6.01596	29.6363	HIF1A;RELA;VEGFA;NFE2L2
GO_Biological_Process_2021	positive regulation of transcription regulatory region DNA binding (GO:2000679)	0.00725339	0.0343345	0	0	6.01596	29.6363	RB1;TGFB1;TWIST1;GATA3
GO_Biological_Process_2021	positive regulation of vascular associated smooth muscle cell proliferation (GO:1904707)	0.00725339	0.0343345	0	0	6.01596	29.6363	IL10;JUN;MMP2;MMP9
GO_Biological_Process_2021	regulation of anoikis (GO:2000209)	0.00725339	0.0343345	0	0	6.01596	29.6363	PIK3CA;SRC;BCL2;MCL1
GO_Biological_Process_2021	regulation of cholesterol metabolic process (GO:0090181)	0.00725339	0.0343345	0	0	6.01596	29.6363	MBTPS1;EPHX2;NR1H4;FMO5
GO_Biological_Process_2021	alpha-amino acid metabolic process (GO:1901605)	0.00738684	0.0347998	0	0	3.8408	18.8509	MTRR;GPT2;GADL1;KYAT3;GPT;KYAT1
GO_Biological_Process_2021	positive regulation of nucleocytoplasmic transport (GO:0046824)	0.00738684	0.0347998	0	0	3.8408	18.8509	YWHAE;GSK3B;TGFB1;PRKCD;EMD;TP53
GO_Biological_Process_2021	postreplication repair (GO:0006301)	0.00738684	0.0347998	0	0	3.8408	18.8509	PCNA;REV1;POLI;BRCA1;POLK;POLH
GO_Biological_Process_2021	regulation of B cell proliferation (GO:0030888)	0.00738684	0.0347998	0	0	3.8408	18.8509	LYN;IL10;PTPRC;BCL2;ATM;AHR
GO_Biological_Process_2021	positive regulation of supramolecular fiber organization (GO:1902905)	0.00744066	0.0350118	0	0	2.81546	13.798	RB1;APP;NCKAP1;GPX1;ALOX15;RAC1;MAPT;MAPRE1;MET
GO_Biological_Process_2021	regulation of transcription by RNA polymerase II (GO:0006357)	0.00750098	0.0351632	0	0	1.31604	6.43902	RB1;APP;EHMT2;SERPINE1;RORC;AHR;NR3C1;TNF;IKZF5;RPS6KA5;CCND1;NAMPT;SAP130;RPS6KA1;SUPT20H;HGF;USP2;MITF;AR;DDIT3;PRKD1;ERG;EZR;TP53;SKAP1;KMT2A;CBFB;FOXG1;GATA6;GATA5;TWIST1;GATA4;GATA3;GATA2;HIF1A;GATA1;FOXO1;SAFB2;NLRP3;ELANE;NFE2;JUN;TGFB1;VDR;PLK1;ESR1;NFKB1;ESR2;NFKBIA;IL6;COPS5;SP1;CDK4;ID4;PIN1;ATM;CDK13;NFE2L2;ARF4;THRB;PTEN;BRCA1;HMGB1;PPP3CA;SDR16C5;PPP3CB;TRPS1;HRAS;NKX3-1;PARP1;EED;N…
GO_Biological_Process_2021	positive regulation of ATP metabolic process (GO:1903580)	0.00750835	0.0351632	0	0	4.56915	22.3511	APP;PRKAA2;PPARA;HIF1A;INS
GO_Biological_Process_2021	positive regulation of telomere maintenance via telomerase (GO:0032212)	0.00750835	0.0351632	0	0	4.56915	22.3511	MAPK1;CTNNB1;MAPKAPK5;ATM;MAPK15
GO_Biological_Process_2021	regulation of histone acetylation (GO:0035065)	0.00750835	0.0351632	0	0	4.56915	22.3511	SDR16C5;RPS6KA5;KMT2A;CHEK1;BRCA1
GO_Biological_Process_2021	negative regulation of immune response (GO:0050777)	0.00781869	0.0365302	0	0	2.19512	10.6491	LYN;IL10;PTGIR;SYK;SRC;ALOX15;GPBAR1;PTH1R;MAPK14;TSHR;FGR;IL6;PPM1B;PRKACG
GO_Biological_Process_2021	regulation of mitotic cell cycle (GO:0007346)	0.00781869	0.0365302	0	0	2.19512	10.6491	RB1;IL10;APP;TGFB1;DUSP3;USP2;PLK1;PRKCA;CDC25B;CYLD;RPS6KB1;PIN1;CDK13;NKX3-1
GO_Biological_Process_2021	water-soluble vitamin metabolic process (GO:0006767)	0.00787234	0.0367376	0	0	3.01604	14.6109	DHFR;PRSS1;MTRR;RFK;CTRB2;CTRB1;PRSS3;CTRC
GO_Biological_Process_2021	positive regulation of DNA biosynthetic process (GO:2000573)	0.00795393	0.0370746	0	0	3.32122	16.0551	PCNA;HGF;MAPK1;CTNNB1;MAPKAPK5;ATM;MAPK15
GO_Biological_Process_2021	negative regulation of cold-induced thermogenesis (GO:0120163)	0.00820364	0.0381489	0	0	3.74693	17.9972	RB1;RHEB;NR1H2;DDIT3;ADIPOQ;ALDH1A1
GO_Biological_Process_2021	positive regulation of neuron death (GO:1901216)	0.00820364	0.0381489	0	0	3.74693	17.9972	GSK3B;DDIT3;BAX;CTNNB1;MAPT;TNF
GO_Biological_Process_2021	B cell receptor signaling pathway (GO:0050853)	0.00853483	0.0393655	0	0	4.41136	21.014	PTPRC;SYK;LCK;BCL2;BAX
GO_Biological_Process_2021	epithelial tube morphogenesis (GO:0060562)	0.00853483	0.0393655	0	0	4.41136	21.014	CTNNB1;GATA3;MET;NKX3-1;RHOB
GO_Biological_Process_2021	organic cyclic compound biosynthetic process (GO:1901362)	0.00853483	0.0393655	0	0	4.41136	21.014	HDC;HSD17B1;CYP51A1;CYP19A1;LSS
GO_Biological_Process_2021	phosphatidylinositol 3-kinase signaling (GO:0014065)	0.00853483	0.0393655	0	0	4.41136	21.014	PIK3CA;ERBB2;PTEN;AKT1;GATA3
GO_Biological_Process_2021	protein insertion into membrane (GO:0051205)	0.00853483	0.0393655	0	0	4.41136	21.014	APP;SEC61G;HMOX1;EMD;EGFR
GO_Biological_Process_2021	regulation of keratinocyte differentiation (GO:0045616)	0.00853483	0.0393655	0	0	4.41136	21.014	ROCK1;CBFB;ROCK2;VDR;SGPP1
GO_Biological_Process_2021	regulation of lamellipodium assembly (GO:0010591)	0.00853483	0.0393655	0	0	4.41136	21.014	CDC42;NCKAP1;PIK3CA;RAC2;RAC1
GO_Biological_Process_2021	fatty-acyl-CoA metabolic process (GO:0035337)	0.00860454	0.0394574	0	0	5.68144	27.0179	ACLY;FASN;HSD17B8;CBR4
GO_Biological_Process_2021	membrane protein intracellular domain proteolysis (GO:0031293)	0.00860454	0.0394574	0	0	5.68144	27.0179	MBTPS1;TGFB1;RELA;NFKB1
GO_Biological_Process_2021	negative regulation of biomineral tissue development (GO:0070168)	0.00860454	0.0394574	0	0	5.68144	27.0179	TGFB1;ROCK1;NOS3;ROCK2
GO_Biological_Process_2021	negative regulation of protein dephosphorylation (GO:0035308)	0.00860454	0.0394574	0	0	5.68144	27.0179	YWHAE;FKBP1A;GSK3B;FKBP1B
GO_Biological_Process_2021	regulation of endoplasmic reticulum stress-induced intrinsic apoptotic signaling pathway (GO:1902235)	0.00860454	0.0394574	0	0	5.68144	27.0179	LRRK2;DDIT3;BCL2L1;BOK
GO_Biological_Process_2021	stress-activated MAPK cascade (GO:0051403)	0.00868168	0.0397651	0	0	3.26066	15.4769	MAPK9;MAPK11;MAPK1;TAB1;MAPK14;NFKB1;MAPK13
GO_Biological_Process_2021	regulation of kinase activity (GO:0043549)	0.00914452	0.0410503	0	0	2.71566	12.749	RB1;RBL2;FGR;PDGFRA;MUSK;ERBB2;MAPT;MET;EGFR
GO_Biological_Process_2021	calcineurin-mediated signaling (GO:0097720)	0.009165	0.0410503	0	0	8.51483	39.9547	PPP3CA;PPP3CB;PPP3CC
GO_Biological_Process_2021	double-strand break repair via break-induced replication (GO:0000727)	0.009165	0.0410503	0	0	8.51483	39.9547	CDC45;MCM7;MCM2
GO_Biological_Process_2021	mitotic G1/S transition checkpoint signaling (GO:0044819)	0.009165	0.0410503	0	0	8.51483	39.9547	CCND1;CDK2;TP53
GO_Biological_Process_2021	mitotic nuclear membrane disassembly (GO:0007077)	0.009165	0.0410503	0	0	8.51483	39.9547	CCNB2;PLK1;PRKCA
GO_Biological_Process_2021	negative regulation of B cell proliferation (GO:0030889)	0.009165	0.0410503	0	0	8.51483	39.9547	LYN;IL10;ATM
GO_Biological_Process_2021	negative regulation of oxidoreductase activity (GO:0051354)	0.009165	0.0410503	0	0	8.51483	39.9547	GZMA;HP;INS
GO_Biological_Process_2021	negative regulation of release of sequestered calcium ion into cytosol (GO:0051280)	0.009165	0.0410503	0	0	8.51483	39.9547	FKBP1A;FKBP1B;CALM2
GO_Biological_Process_2021	negative regulation of ryanodine-sensitive calcium-release channel activity (GO:0060315)	0.009165	0.0410503	0	0	8.51483	39.9547	FKBP1A;FKBP1B;CALM2
GO_Biological_Process_2021	positive regulation of endoplasmic reticulum unfolded protein response (GO:1900103)	0.009165	0.0410503	0	0	8.51483	39.9547	PTPN1;BAX;BOK
GO_Biological_Process_2021	positive regulation of vascular permeability (GO:0043117)	0.009165	0.0410503	0	0	8.51483	39.9547	TGFB1;ANGPT1;VEGFA
GO_Biological_Process_2021	purine nucleoside monophosphate biosynthetic process (GO:0009127)	0.009165	0.0410503	0	0	8.51483	39.9547	IMPDH1;IMPDH2;GART
GO_Biological_Process_2021	regulation of amyloid precursor protein catabolic process (GO:1902991)	0.009165	0.0410503	0	0	8.51483	39.9547	FKBP1A;ROCK1;ROCK2
GO_Biological_Process_2021	regulation of astrocyte differentiation (GO:0048710)	0.009165	0.0410503	0	0	8.51483	39.9547	IL6;NOG;F2
GO_Biological_Process_2021	regulation of keratinocyte migration (GO:0051547)	0.009165	0.0410503	0	0	8.51483	39.9547	PTEN;MMP9;MAPRE2
GO_Biological_Process_2021	regulation of MHC class II biosynthetic process (GO:0045346)	0.009165	0.0410503	0	0	8.51483	39.9547	IL10;AZU1;JAK2
GO_Biological_Process_2021	regulation of plasminogen activation (GO:0010755)	0.009165	0.0410503	0	0	8.51483	39.9547	F12;HPN;SERPINE1
GO_Biological_Process_2021	regulation of sister chromatid cohesion (GO:0007063)	0.009165	0.0410503	0	0	8.51483	39.9547	RB1;FEN1;CTNNB1
GO_Biological_Process_2021	tricarboxylic acid metabolic process (GO:0072350)	0.009165	0.0410503	0	0	8.51483	39.9547	ACLY;IDH1;SIRT4
GO_Biological_Process_2021	negative regulation of protein serine/threonine kinase activity (GO:0071901)	0.0091695	0.0410503	0	0	2.92956	13.7451	RB1;LYN;PTPN1;ADIPOQ;PRKCD;PLK1;PTEN;AKT1
GO_Biological_Process_2021	regulation of Wnt signaling pathway (GO:0030111)	0.00936571	0.0418814	0	0	2.54068	11.8667	PPP2CA;APP;MACF1;CSNK2A1;CBFB;LRP1;LRRK2;CTNNB1;ESR1;EMD
GO_Biological_Process_2021	monocarboxylic acid biosynthetic process (GO:0072330)	0.00945714	0.042195	0	0	3.20227	14.9257	ACLY;AMACR;PLA2G1B;HSD17B8;HSD17B10;ACSF3;CBR4
GO_Biological_Process_2021	positive regulation of DNA metabolic process (GO:0051054)	0.00945714	0.042195	0	0	3.20227	14.9257	PCNA;RAD51;HGF;CEBPG;HMGB1;BRCA1;EGFR
GO_Biological_Process_2021	negative regulation of neurogenesis (GO:0050768)	0.00965442	0.042834	0	0	4.26409	19.7868	IL6;MAG;PTEN;TNF;RHOA
GO_Biological_Process_2021	regulation of JUN kinase activity (GO:0043506)	0.00965442	0.042834	0	0	4.26409	19.7868	TAOK3;NPPA;TRAF2;TNF;PPEF2
GO_Biological_Process_2021	regulation of muscle cell differentiation (GO:0051147)	0.00965442	0.042834	0	0	4.26409	19.7868	CDC42;MAPK11;CTNNB1;MAPK14;MAPK12
GO_Biological_Process_2021	regulation of phosphatidylinositol 3-kinase activity (GO:0043551)	0.00965442	0.042834	0	0	4.26409	19.7868	P2RY12;FGR;PDGFRA;TGFB1;PRKD1
GO_Biological_Process_2021	regulation of T cell receptor signaling pathway (GO:0050856)	0.00965442	0.042834	0	0	4.26409	19.7868	DUSP3;LCK;EZR;RELA;PTPN2
GO_Biological_Process_2021	regulation of cellular response to heat (GO:1900034)	0.00987482	0.0437629	0	0	2.88815	13.3368	YWHAE;GSK3B;DNAJB1;BAG5;MAPKAPK2;MAPK1;ATM;MAPT
GO_Biological_Process_2021	regulation of cellular localization (GO:0060341)	0.0100284	0.0443939	0	0	3.57228	16.4408	LYN;PARP1;LRRK2;STXBP2;NR1H4;PPM1F
GO_Biological_Process_2021	positive regulation of receptor internalization (GO:0002092)	0.0101101	0.0445071	0	0	5.38214	24.7267	ANGPT1;EGF;SELE;VEGFA
GO_Biological_Process_2021	regulation of interleukin-4 production (GO:0032673)	0.0101101	0.0445071	0	0	5.38214	24.7267	SYK;DDIT3;NLRP3;GATA3
GO_Biological_Process_2021	regulation of protein export from nucleus (GO:0046825)	0.0101101	0.0445071	0	0	5.38214	24.7267	YWHAE;GSK3B;EMD;TP53
GO_Biological_Process_2021	regulation of supramolecular fiber organization (GO:1902903)	0.0101101	0.0445071	0	0	5.38214	24.7267	GPX1;PIK3CA;MAPRE3;MAPT
GO_Biological_Process_2021	regulation of telomere capping (GO:1904353)	0.0101101	0.0445071	0	0	5.38214	24.7267	MAPK1;MAPKAPK5;ATM;MAPK15
GO_Biological_Process_2021	embryonic limb morphogenesis (GO:0030326)	0.0108709	0.0476972	0	0	4.12633	18.6579	MBNL1;HDAC1;NOG;TWIST1;CTNNB1
GO_Biological_Process_2021	positive regulation of telomere maintenance via telomere lengthening (GO:1904358)	0.0108709	0.0476972	0	0	4.12633	18.6579	MAPK1;CTNNB1;MAPKAPK5;ATM;MAPK15
GO_Biological_Process_2021	regulation of receptor internalization (GO:0002090)	0.0108709	0.0476972	0	0	4.12633	18.6579	ARF1;ANGPT1;EGF;SELE;VEGFA
GO_Biological_Process_2021	mitotic G1 DNA damage checkpoint signaling (GO:0031571)	0.0111581	0.0489029	0	0	3.09152	13.8982	RBL2;PCNA;CCND1;CDK2;BAX;ATM;TP53
GO_Biological_Process_2021	positive regulation of cellular component organization (GO:0051130)	0.0111914	0.0489949	0	0	2.467	11.0833	RB1;AR;GSK3B;TGFB1;GPX1;SYK;LRP1;BAX;TNF;VEGFA
GO_Biological_Process_2021	negative regulation of CD4-positive, alpha-beta T cell activation (GO:2000515)	0.0115839	0.0499951	0	0	7.66295	34.1625	TWSG1;CBFB;HMGB1
GO_Biological_Process_2021	negative regulation of macromolecule biosynthetic process (GO:0010558)	0.0115839	0.0499951	0	0	7.66295	34.1625	IL10;AR;TGFB1
GO_Biological_Process_2021	oligosaccharide-lipid intermediate biosynthetic process (GO:0006490)	0.0115839	0.0499951	0	0	7.66295	34.1625	ALG2;ALG1;ALG11
GO_Biological_Process_2021	positive regulation of histone deacetylation (GO:0031065)	0.0115839	0.0499951	0	0	7.66295	34.1625	SDR16C5;PRKD1;VEGFA
GO_Biological_Process_2021	positive regulation of purine nucleotide biosynthetic process (GO:1900373)	0.0115839	0.0499951	0	0	7.66295	34.1625	NOS2;NOS3;PPARA
GO_Biological_Process_2021	positive regulation of vascular endothelial cell proliferation (GO:1905564)	0.0115839	0.0499951	0	0	7.66295	34.1625	PDPK1;SP1;HMGB1
GO_Biological_Process_2021	protein heterotetramerization (GO:0051290)	0.0115839	0.0499951	0	0	7.66295	34.1625	NUDT21;HSD17B8;CBR4
GO_Biological_Process_2021	protein localization to mitochondrion (GO:0070585)	0.0115839	0.0499951	0	0	7.66295	34.1625	RALA;LRRK2;AKT1
GO_Biological_Process_2021	regulation of antigen receptor-mediated signaling pathway (GO:0050854)	0.0115839	0.0499951	0	0	7.66295	34.1625	LYN;PTPRC;CBFB
GO_Biological_Process_2021	regulation of oxidoreductase activity (GO:0051341)	0.0115839	0.0499951	0	0	7.66295	34.1625	GZMA;HP;SIRT4
GO_Biological_Process_2021	regulation of tube diameter (GO:0035296)	0.0115839	0.0499951	0	0	7.66295	34.1625	ROCK1;NOS3;ROCK2
GO_Biological_Process_2021	response to thyroid hormone (GO:0097066)	0.0115839	0.0499951	0	0	7.66295	34.1625	THRB;HPN;GATA1
GO_Biological_Process_2021	vascular process in circulatory system (GO:0003018)	0.0115839	0.0499951	0	0	7.66295	34.1625	ROCK1;NOS3;ROCK2
GO_Biological_Process_2021	C21-steroid hormone metabolic process (GO:0008207)	0.0117764	0.0505505	0	0	5.11277	22.7092	FDX1;AKR1B1;DHRS2;HSD17B10
GO_Biological_Process_2021	negative regulation of lipid metabolic process (GO:0045833)	0.0117764	0.0505505	0	0	5.11277	22.7092	UGT1A1;TNF;UGT1A8;INS
GO_Biological_Process_2021	nucleotide-excision repair, DNA gap filling (GO:0006297)	0.0117764	0.0505505	0	0	5.11277	22.7092	POLB;PCNA;XRCC1;POLK
GO_Biological_Process_2021	regulation of cardiac muscle hypertrophy (GO:0010611)	0.0117764	0.0505505	0	0	5.11277	22.7092	ROCK1;PARP1;ROCK2;PRKCA
GO_Biological_Process_2021	regulation of cell size (GO:0008361)	0.0117764	0.0505505	0	0	5.11277	22.7092	PTEN;RAC1;EZR;RHOA
GO_Biological_Process_2021	regulation of protein localization (GO:0032880)	0.0120869	0.0517083	0	0	3.03897	13.419	FKBP1A;PARP1;RAB14;CTSD;PPM1F;NKX3-1;INS
GO_Biological_Process_2021	blood circulation (GO:0008015)	0.0121244	0.0517083	0	0	3.41316	15.0607	GPX1;ROCK1;ROCK2;NOS3;LPA;F5
GO_Biological_Process_2021	inositol lipid-mediated signaling (GO:0048017)	0.0121244	0.0517083	0	0	3.41316	15.0607	PDGFRA;PIK3CA;RPS6KB1;PIK3C3;EZR;RHOA
GO_Biological_Process_2021	positive regulation of actin filament bundle assembly (GO:0032233)	0.0121244	0.0517083	0	0	3.41316	15.0607	CDC42;ROCK2;RAC1;PPM1E;RHOA;PPM1F
GO_Biological_Process_2021	positive regulation of fat cell differentiation (GO:0045600)	0.0121244	0.0517083	0	0	3.41316	15.0607	PIM1;AKT1;PPARG;PTGS2;PPARD;INS
GO_Biological_Process_2021	regulation of protein modification process (GO:0031399)	0.0121244	0.0517083	0	0	3.41316	15.0607	PPP2CA;LYN;SPRED1;FN1;HSPB1;PIN1
GO_Biological_Process_2021	negative regulation of stress-activated MAPK cascade (GO:0032873)	0.012188	0.0518678	0	0	3.99717	17.6167	CYLD;DUSP3;TAOK3;EZR;FOXO1
GO_Biological_Process_2021	positive regulation of signaling receptor activity (GO:2000273)	0.012188	0.0518678	0	0	3.99717	17.6167	IL10;HDAC1;EGF;JAK2;HIF1A
GO_Biological_Process_2021	regulation of epidermal growth factor receptor signaling pathway (GO:0042058)	0.0130703	0.0542433	0	0	2.98816	12.9609	CDC42;DUSP3;EGF;AKT1;MMP9;EGFR;PTPN2
GO_Biological_Process_2021	protein-containing complex assembly (GO:0065003)	0.013171	0.0542433	0	0	1.86061	8.05597	GSK3B;BLM;KMT2A;CSNK1A1;HDAC1;CUL3;LRRK2;FN1;ASH2L;MITF;TRAF2;TNF;F5;F8;CASP8;CTNNB1;TP53;BOK
GO_Biological_Process_2021	beta-catenin destruction complex assembly (GO:1904885)	0.0132241	0.0542433	0	0	17.0124	73.5907	GSK3B;CSNK1A1
GO_Biological_Process_2021	bone marrow development (GO:0048539)	0.0132241	0.0542433	0	0	17.0124	73.5907	PTPRC;TP53
GO_Biological_Process_2021	cellular response to indole-3-methanol (GO:0071681)	0.0132241	0.0542433	0	0	17.0124	73.5907	CTNNB1;BRCA1
GO_Biological_Process_2021	cellular response to testosterone stimulus (GO:0071394)	0.0132241	0.0542433	0	0	17.0124	73.5907	AR;ROCK2
GO_Biological_Process_2021	cellular response to vitamin D (GO:0071305)	0.0132241	0.0542433	0	0	17.0124	73.5907	VDR;PIM1
GO_Biological_Process_2021	chronic inflammatory response (GO:0002544)	0.0132241	0.0542433	0	0	17.0124	73.5907	CXCL13;TNF
GO_Biological_Process_2021	DNA ligation involved in DNA repair (GO:0051103)	0.0132241	0.0542433	0	0	17.0124	73.5907	POLB;XRCC1
GO_Biological_Process_2021	embryonic skeletal joint morphogenesis (GO:0060272)	0.0132241	0.0542433	0	0	17.0124	73.5907	NOG;CTNNB1
GO_Biological_Process_2021	extracellular exosome biogenesis (GO:0097734)	0.0132241	0.0542433	0	0	17.0124	73.5907	COPS5;RAB11A
GO_Biological_Process_2021	histone-threonine phosphorylation (GO:0035405)	0.0132241	0.0542433	0	0	17.0124	73.5907	PRKCA;PKN1
GO_Biological_Process_2021	intracellular distribution of mitochondria (GO:0048312)	0.0132241	0.0542433	0	0	17.0124	73.5907	LRRK2;MAPT
GO_Biological_Process_2021	negative regulation of calcium ion transport into cytosol (GO:0010523)	0.0132241	0.0542433	0	0	17.0124	73.5907	FKBP1A;FKBP1B
GO_Biological_Process_2021	negative regulation of CD4-positive, alpha-beta T cell differentiation (GO:0043371)	0.0132241	0.0542433	0	0	17.0124	73.5907	CBFB;HMGB1
GO_Biological_Process_2021	negative regulation of gene silencing by RNA (GO:0060967)	0.0132241	0.0542433	0	0	17.0124	73.5907	TGFB1;PPARG
GO_Biological_Process_2021	negative regulation of macrophage differentiation (GO:0045650)	0.0132241	0.0542433	0	0	17.0124	73.5907	ADIPOQ;PTPN2
GO_Biological_Process_2021	negative regulation of posttranscriptional gene silencing (GO:0060149)	0.0132241	0.0542433	0	0	17.0124	73.5907	TGFB1;PPARG
GO_Biological_Process_2021	negative regulation of response to food (GO:0032096)	0.0132241	0.0542433	0	0	17.0124	73.5907	SPX;PPARA
GO_Biological_Process_2021	negative regulation of tubulin deacetylation (GO:1904428)	0.0132241	0.0542433	0	0	17.0124	73.5907	PRKAA2;MAPT
GO_Biological_Process_2021	oxaloacetate transport (GO:0015729)	0.0132241	0.0542433	0	0	17.0124	73.5907	SLC25A10;SLC25A11
GO_Biological_Process_2021	positive regulation of glial cell proliferation (GO:0060252)	0.0132241	0.0542433	0	0	17.0124	73.5907	IL6;TNF
GO_Biological_Process_2021	positive regulation of heat generation (GO:0031652)	0.0132241	0.0542433	0	0	17.0124	73.5907	PTGS2;TNF
GO_Biological_Process_2021	positive regulation of mast cell activation involved in immune response (GO:0033008)	0.0132241	0.0542433	0	0	17.0124	73.5907	FGR;SYK
GO_Biological_Process_2021	regulation of chromosome separation (GO:1905818)	0.0132241	0.0542433	0	0	17.0124	73.5907	CSNK2A1;CSNK2A2
GO_Biological_Process_2021	regulation of fever generation (GO:0031620)	0.0132241	0.0542433	0	0	17.0124	73.5907	PTGS2;TNF
GO_Biological_Process_2021	regulation of guanylate cyclase activity (GO:0031282)	0.0132241	0.0542433	0	0	17.0124	73.5907	NOS2;NOS3
GO_Biological_Process_2021	regulation of platelet-derived growth factor receptor-beta signaling pathway (GO:2000586)	0.0132241	0.0542433	0	0	17.0124	73.5907	LRP1;PTPN2
GO_Biological_Process_2021	regulation of system process (GO:0044057)	0.0132241	0.0542433	0	0	17.0124	73.5907	NOS3;ROCK2
GO_Biological_Process_2021	response to indole-3-methanol (GO:0071680)	0.0132241	0.0542433	0	0	17.0124	73.5907	CTNNB1;BRCA1
GO_Biological_Process_2021	salivary gland development (GO:0007431)	0.0132241	0.0542433	0	0	17.0124	73.5907	TGFB1;NKX3-1
GO_Biological_Process_2021	salivary gland morphogenesis (GO:0007435)	0.0132241	0.0542433	0	0	17.0124	73.5907	TGFB1;NKX3-1
GO_Biological_Process_2021	vitamin D3 metabolic process (GO:0070640)	0.0132241	0.0542433	0	0	17.0124	73.5907	UGT1A4;UGT1A3
GO_Biological_Process_2021	positive regulation of I-kappaB kinase/NF-kappaB signaling (GO:0043123)	0.0132265	0.0542433	0	0	2.11355	9.14223	MAP3K3;ADIPOQ;TRAF2;TNF;RHOA;RELA;FKBP1A;PPM1A;PPP5C;CASP8;CASP1;HMOX1;PRKD1
GO_Biological_Process_2021	negative regulation of protein-containing complex assembly (GO:0031333)	0.0132802	0.0542433	0	0	3.33878	14.4285	CDC42;GSK3B;PPM1A;SRC;HMGB1;RAF1
GO_Biological_Process_2021	positive regulation of protein localization to cell periphery (GO:1904377)	0.0132802	0.0542433	0	0	3.33878	14.4285	LRP1;PDPK1;RHOG;AKT1;TNF;EGFR
GO_Biological_Process_2021	positive regulation of protein localization to plasma membrane (GO:1903078)	0.0132802	0.0542433	0	0	3.33878	14.4285	LRP1;PDPK1;RHOG;AKT1;TNF;EGFR
GO_Biological_Process_2021	regulation of release of sequestered calcium ion into cytosol (GO:0051279)	0.0132802	0.0542433	0	0	3.33878	14.4285	FKBP1A;PDPK1;DHRS7C;FKBP1B;F2;CALM2
GO_Biological_Process_2021	regulation of telomere maintenance via telomerase (GO:0032210)	0.0132802	0.0542433	0	0	3.33878	14.4285	SRC;MAPK1;CTNNB1;MAPKAPK5;ATM;MAPK15
GO_Biological_Process_2021	positive regulation of Wnt signaling pathway (GO:0030177)	0.0134774	0.054992	0	0	2.1852	9.41109	MACF1;PPM1A;PPM1B;TGFB1;CSNK2A1;EGF;LRRK2;PPM1N;PIN1;ILK;NFKB1;EGFR
GO_Biological_Process_2021	fat-soluble vitamin metabolic process (GO:0006775)	0.013609	0.0550762	0	0	4.86905	20.9224	CBR1;VDR;CYP1A1;CYP3A4
GO_Biological_Process_2021	positive regulation of T cell migration (GO:2000406)	0.013609	0.0550762	0	0	4.86905	20.9224	APP;CCL20;CXCL13;RHOA
GO_Biological_Process_2021	regulation of cholesterol transport (GO:0032374)	0.013609	0.0550762	0	0	4.86905	20.9224	CETP;LRP1;NR1H2;NFKB1
GO_Biological_Process_2021	regulation of epidermal cell differentiation (GO:0045604)	0.013609	0.0550762	0	0	4.86905	20.9224	ROCK1;CBFB;ROCK2;SGPP1
GO_Biological_Process_2021	DNA replication initiation (GO:0006270)	0.0136092	0.0550762	0	0	3.87584	16.6545	CDC45;MCM7;GMNN;CDK2;MCM2
GO_Biological_Process_2021	lymphocyte proliferation (GO:0046651)	0.0136092	0.0550762	0	0	3.87584	16.6545	IL10;PPP3CB;PTPRC;IFNB1;BCL2
GO_Biological_Process_2021	negative regulation of G0 to G1 transition (GO:0070317)	0.0136092	0.0550762	0	0	3.87584	16.6545	RAD51;EED;EHMT2;CHEK1;BRCA1
GO_Biological_Process_2021	positive regulation of signaling (GO:0023056)	0.0136092	0.0550762	0	0	3.87584	16.6545	ADIPOQ;NMU;ILK;GATA3;TNF
GO_Biological_Process_2021	lymphocyte differentiation (GO:0030098)	0.0140192	0.0566632	0	0	2.69744	11.5109	IL10;PTPRC;LCK;IFNB1;CEBPG;RHOH;GATA3;PTPN2
GO_Biological_Process_2021	regulation of cellular response to stress (GO:0080135)	0.0140299	0.0566632	0	0	2.37514	10.1337	YWHAE;GSK3B;DNAJB1;BAG5;ROCK2;MAPKAPK2;MAPK1;ATM;MAPT;MCL1
GO_Biological_Process_2021	canonical Wnt signaling pathway (GO:0060070)	0.0141097	0.0568696	0	0	2.93902	12.5229	GSK3B;CSNK1A1;LRRK2;PTEN;CTNNB1;GATA3;PLPP3
GO_Biological_Process_2021	negative regulation of transforming growth factor beta receptor signaling pathway (GO:0030512)	0.0141097	0.0568696	0	0	2.93902	12.5229	FKBP1A;PPM1A;SPRED1;TGFB1;PDPK1;PIN1;PPARA
GO_Biological_Process_2021	2-oxoglutarate metabolic process (GO:0006103)	0.014335	0.0570805	0	0	6.96595	29.5709	IDH1;GPT2;TAT
GO_Biological_Process_2021	cytoplasmic sequestering of transcription factor (GO:0042994)	0.014335	0.0570805	0	0	6.96595	29.5709	IL10;NFKBIA;KEAP1
GO_Biological_Process_2021	negative regulation of cell activation (GO:0050866)	0.014335	0.0570805	0	0	6.96595	29.5709	PDGFRA;NOS3;F2
GO_Biological_Process_2021	negative regulation of smooth muscle cell migration (GO:0014912)	0.014335	0.0570805	0	0	6.96595	29.5709	LRP1;ADIPOQ;SERPINE1
GO_Biological_Process_2021	nuclear membrane disassembly (GO:0051081)	0.014335	0.0570805	0	0	6.96595	29.5709	CCNB2;PLK1;PRKCA
GO_Biological_Process_2021	positive regulation of brown fat cell differentiation (GO:0090336)	0.014335	0.0570805	0	0	6.96595	29.5709	PIM1;PTGS2;INS
GO_Biological_Process_2021	positive regulation of cyclase activity (GO:0031281)	0.014335	0.0570805	0	0	6.96595	29.5709	NOS2;NOS3;MAPK14
GO_Biological_Process_2021	positive regulation of lymphocyte migration (GO:2000403)	0.014335	0.0570805	0	0	6.96595	29.5709	APP;CCL20;RHOA
GO_Biological_Process_2021	quinone biosynthetic process (GO:1901663)	0.014335	0.0570805	0	0	6.96595	29.5709	PDSS1;COQ10B;COQ10A
GO_Biological_Process_2021	regulation of fatty acid beta-oxidation (GO:0031998)	0.014335	0.0570805	0	0	6.96595	29.5709	TWIST1;AKT1;PPARA
GO_Biological_Process_2021	regulation of response to interferon-gamma (GO:0060330)	0.014335	0.0570805	0	0	6.96595	29.5709	JAK2;PTPN2;JAK1
GO_Biological_Process_2021	vasodilation (GO:0042311)	0.014335	0.0570805	0	0	6.96595	29.5709	NOS3;KCNMA1;INS
GO_Biological_Process_2021	cellular response to interleukin-1 (GO:0071347)	0.0148109	0.0589163	0	0	2.15441	9.07523	NFKBIA;MAP3K3;MAPK11;RPS6KA5;CXCL8;CCL20;TAB1;HIF1A;NFKB1;RELA;NKX3-1;MAPK13
GO_Biological_Process_2021	regulation of protein catabolic process (GO:0042176)	0.0151268	0.059976	0	0	2.48102	10.3987	GSK3B;CSNK2A1;CYP51A1;PIN1;HMGCR;TNF;FOXO1;EGFR;INS
GO_Biological_Process_2021	DNA recombination (GO:0006310)	0.0151378	0.059976	0	0	3.76165	15.7634	BLM;RAD51;ERCC1;RECQL;HMGB1
GO_Biological_Process_2021	regulation of protein tyrosine kinase activity (GO:0061097)	0.0151378	0.059976	0	0	3.76165	15.7634	RAP2C;APP;PTPN1;PTPRC;RAP2B
GO_Biological_Process_2021	regulation of T cell differentiation (GO:0045580)	0.0151378	0.059976	0	0	3.76165	15.7634	KAT2A;CBFB;IFNB1;RHOH;GATA3
GO_Biological_Process_2021	DNA geometric change (GO:0032392)	0.0156131	0.0616128	0	0	4.64749	19.3319	BLM;MCM9;RECQL;HMGB1
GO_Biological_Process_2021	mononuclear cell differentiation (GO:1903131)	0.0156131	0.0616128	0	0	4.64749	19.3319	LYN;CSF2;PPARG;VEGFA
GO_Biological_Process_2021	positive regulation of microtubule polymerization or depolymerization (GO:0031112)	0.0156131	0.0616128	0	0	4.64749	19.3319	RAC1;MAPT;MAPRE1;MET
GO_Biological_Process_2021	regulation of actin filament bundle assembly (GO:0032231)	0.0156131	0.0616128	0	0	4.64749	19.3319	CDC42;ROCK1;ROCK2;RAC1
GO_Biological_Process_2021	macroautophagy (GO:0016236)	0.0156362	0.0616425	0	0	2.33171	9.69563	PRKAA2;CSNK2A1;SRC;EI24;CSNK2A2;PRKAG1;PRKAG2;VDAC1;PIK3C3;PRKAG3
GO_Biological_Process_2021	cellular response to tumor necrosis factor (GO:0071356)	0.0158081	0.062237	0	0	1.99832	8.28751	CXCL8;CCL20;ILK;TRAF2;GATA3;BRCA1;TNF;RELA;NFKBIA;AKT1;JAK2;TP53;NFE2L2;NKX3-1
GO_Biological_Process_2021	positive regulation of leukocyte chemotaxis (GO:0002690)	0.0158184	0.062237	0	0	3.19933	13.2663	F7;IL6;SERPINE1;MAPK1;HMGB1;VEGFA
GO_Biological_Process_2021	negative regulation of phosphorylation (GO:0042326)	0.0159883	0.062843	0	0	2.628	10.8691	LYN;TGFB1;ROCK1;LRRK2;PTEN;MAPT;PPARA;PLPP3
GO_Biological_Process_2021	fatty acid catabolic process (GO:0009062)	0.0163636	0.0642541	0	0	2.84542	11.7024	PECR;MECR;BDH2;ADIPOQ;HSD17B10;PPARD;DECR1
GO_Biological_Process_2021	protein localization to membrane (GO:0072657)	0.0164616	0.0645752	0	0	1.98718	8.16079	ROCK1;ROCK2;STXBP1;ADIPOQ;TNF;RAB11A;RAB11B;RAP2A;ARL5B;RAP1A;ARL5C;NPC1;EZR;ARL5A
GO_Biological_Process_2021	digestive tract development (GO:0048565)	0.016777	0.0655529	0	0	3.65399	14.9366	CXCL8;GATA6;GATA5;GATA4;TNF
GO_Biological_Process_2021	negative regulation of protein kinase B signaling (GO:0051898)	0.016777	0.0655529	0	0	3.65399	14.9366	PHLPP1;DDIT3;PTEN;AKT1;PPARA
GO_Biological_Process_2021	organic hydroxy compound transport (GO:0015850)	0.016777	0.0655529	0	0	3.65399	14.9366	SLCO1B1;RXRA;SLC10A1;SLCO1B3;NR1H4
GO_Biological_Process_2021	positive regulation of wound healing (GO:0090303)	0.016777	0.0655529	0	0	3.65399	14.9366	F12;SERPINE1;F2;PLPP3;HRAS
GO_Biological_Process_2021	regulation of transcription from RNA polymerase II promoter in response to stress (GO:0043618)	0.0170445	0.0665322	0	0	2.5946	10.565	DNAJB1;DDIT3;CHEK1;HMOX1;TP53;HIF1A;VEGFA;NFE2L2
GO_Biological_Process_2021	glycerophospholipid biosynthetic process (GO:0046474)	0.0171793	0.0667623	0	0	2.03558	8.27271	ARF3;ARF1;CSNK2A1;PLA2G1B;CSNK2A2;ALOX15;PTEN;CRLS1;PIK3CA;GPAM;RAB14;PIK3C3;CDIPT
GO_Biological_Process_2021	interstrand cross-link repair (GO:0036297)	0.0172054	0.0667623	0	0	3.13388	12.7315	DCLRE1A;DCLRE1C;RAD51;MCM9;ERCC1;USP1
GO_Biological_Process_2021	negative regulation of cytokine-mediated signaling pathway (GO:0001960)	0.0172054	0.0667623	0	0	3.13388	12.7315	IL6;PTPRC;NR1H2;ADIPOQ;PPARG;PTPN2
GO_Biological_Process_2021	androgen receptor signaling pathway (GO:0030521)	0.0174236	0.0667623	0	0	6.38513	25.8593	AR;PLPP1;NKX3-1
GO_Biological_Process_2021	contractile actin filament bundle assembly (GO:0030038)	0.0174236	0.0667623	0	0	6.38513	25.8593	SRC;CUL3;RHOA
GO_Biological_Process_2021	electron transport chain (GO:0022900)	0.0174236	0.0667623	0	0	6.38513	25.8593	POR;NDOR1;DHRS2
GO_Biological_Process_2021	integrated stress response signaling (GO:0140467)	0.0174236	0.0667623	0	0	6.38513	25.8593	CXCL8;DDIT3;NFE2L2
GO_Biological_Process_2021	myoblast differentiation (GO:0045445)	0.0174236	0.0667623	0	0	6.38513	25.8593	RB1;MBNL1;MAPK12
GO_Biological_Process_2021	positive regulation of acute inflammatory response (GO:0002675)	0.0174236	0.0667623	0	0	6.38513	25.8593	IL6;PTGS2;TNF
GO_Biological_Process_2021	positive regulation of cell killing (GO:0031343)	0.0174236	0.0667623	0	0	6.38513	25.8593	SYK;NOS2;RAC1
GO_Biological_Process_2021	positive regulation of histone H3-K4 methylation (GO:0051571)	0.0174236	0.0667623	0	0	6.38513	25.8593	KMT2A;CTNNB1;BRCA1
GO_Biological_Process_2021	positive regulation of sprouting angiogenesis (GO:1903672)	0.0174236	0.0667623	0	0	6.38513	25.8593	PDPK1;VEGFA;JAK1
GO_Biological_Process_2021	regulation of endothelial cell chemotaxis (GO:2001026)	0.0174236	0.0667623	0	0	6.38513	25.8593	HSPB1;PRKD1;MET
GO_Biological_Process_2021	regulation of extracellular matrix disassembly (GO:0010715)	0.0174236	0.0667623	0	0	6.38513	25.8593	IL6;TGFB1;LRP1
GO_Biological_Process_2021	regulation of phospholipase C activity (GO:1900274)	0.0174236	0.0667623	0	0	6.38513	25.8593	PDGFRA;ESR1;HRAS
GO_Biological_Process_2021	response to muscle stretch (GO:0035994)	0.0174236	0.0667623	0	0	6.38513	25.8593	PIK3CA;NPPA;CTNNB1
GO_Biological_Process_2021	stress fiber assembly (GO:0043149)	0.0174236	0.0667623	0	0	6.38513	25.8593	SRC;CUL3;RHOA
GO_Biological_Process_2021	ubiquinone biosynthetic process (GO:0006744)	0.0174236	0.0667623	0	0	6.38513	25.8593	PDSS1;COQ10B;COQ10A
GO_Biological_Process_2021	ubiquinone metabolic process (GO:0006743)	0.0174236	0.0667623	0	0	6.38513	25.8593	PDSS1;COQ10B;COQ10A
GO_Biological_Process_2021	protein tetramerization (GO:0051262)	0.017581	0.0672355	0	0	2.80082	11.3179	NUDT21;TRPV1;HSD17B8;ACACB;HSD17B10;CBR4;CRYZ
GO_Biological_Process_2021	regulation of glycolytic process (GO:0006110)	0.017581	0.0672355	0	0	2.80082	11.3179	APP;PRKAA2;PRKAG1;PRKAG2;PPARA;HIF1A;INS
GO_Biological_Process_2021	mitotic chromosome condensation (GO:0007076)	0.0177934	0.0675909	0	0	4.44519	17.9094	RB1;CSNK2A1;PLK1;CSNK2A2
GO_Biological_Process_2021	negative regulation of catalytic activity (GO:0043086)	0.0177934	0.0675909	0	0	4.44519	17.9094	ATP5IF1;GZMA;HP;TP53
GO_Biological_Process_2021	negative regulation of cation channel activity (GO:2001258)	0.0177934	0.0675909	0	0	4.44519	17.9094	FKBP1A;FKBP1B;MMP9;CALM2
GO_Biological_Process_2021	protein peptidyl-prolyl isomerization (GO:0000413)	0.0177934	0.0675909	0	0	4.44519	17.9094	FKBP1A;FKBP1B;PPWD1;PIN1
GO_Biological_Process_2021	regulation of blood coagulation (GO:0030193)	0.0177934	0.0675909	0	0	4.44519	17.9094	PROC;F12;SERPINE1;F2
GO_Biological_Process_2021	response to glucocorticoid (GO:0051384)	0.0177934	0.0675909	0	0	4.44519	17.9094	IL10;IL6;NR3C1;TNF
GO_Biological_Process_2021	stress-activated protein kinase signaling cascade (GO:0031098)	0.0177934	0.0675909	0	0	4.44519	17.9094	MAPK11;MAPK1;NFKB1;MAPK13
GO_Biological_Process_2021	regulation of anatomical structure morphogenesis (GO:0022603)	0.0182965	0.0694354	0	0	2.26945	9.08017	GSK3B;IL6;RAP2A;TGFB1;LRRK2;ERBB2;HMOX1;CTNNB1;MAPT;CXCL13
GO_Biological_Process_2021	keratinocyte differentiation (GO:0030216)	0.0185299	0.0700529	0	0	3.5523	14.1679	TGM1;ST14;CASP3;TXNIP;TGM3
GO_Biological_Process_2021	regulation of cell development (GO:0060284)	0.0185299	0.0700529	0	0	3.5523	14.1679	RHEB;AKT1;CTNNB1;FOXO1;INS
GO_Biological_Process_2021	regulation of G0 to G1 transition (GO:0070316)	0.0185299	0.0700529	0	0	3.5523	14.1679	RAD51;EED;EHMT2;CHEK1;BRCA1
GO_Biological_Process_2021	T cell differentiation (GO:0030217)	0.0185299	0.0700529	0	0	3.5523	14.1679	PTPRC;LCK;RHOH;GATA3;PTPN2
GO_Biological_Process_2021	negative regulation of metabolic process (GO:0009892)	0.0186736	0.070436	0	0	3.07104	12.2247	RB1;RHEB;DDIT3;NR1H2;ADIPOQ;ALDH1A1
GO_Biological_Process_2021	telomere maintenance (GO:0000723)	0.0186736	0.070436	0	0	3.07104	12.2247	BLM;PCNA;RAD51;PARP1;APEX1;ATM
GO_Biological_Process_2021	cell junction organization (GO:0034330)	0.0188609	0.070436	0	0	2.75758	10.9494	CDC42;APP;TGFB1;ILK;PIN1;MAPT;RHOA
GO_Biological_Process_2021	response to ionizing radiation (GO:0010212)	0.0188609	0.070436	0	0	2.75758	10.9494	BLM;RAD51;ATM;BRCA1;MAPK14;TP53;RHOB
GO_Biological_Process_2021	axo-dendritic transport (GO:0008088)	0.0193424	0.070436	0	0	12.7586	50.3386	APP;MAPT
GO_Biological_Process_2021	carnitine transport (GO:0015879)	0.0193424	0.070436	0	0	12.7586	50.3386	SLC25A29;SLC25A20
GO_Biological_Process_2021	cellular carbohydrate catabolic process (GO:0044275)	0.0193424	0.070436	0	0	12.7586	50.3386	NEU2;GUSB
GO_Biological_Process_2021	cellular lipid biosynthetic process (GO:0097384)	0.0193424	0.070436	0	0	12.7586	50.3386	DHRS7B;AGPS
GO_Biological_Process_2021	cellular response to cold (GO:0070417)	0.0193424	0.070436	0	0	12.7586	50.3386	NFKBIA;FOXO1
GO_Biological_Process_2021	cellular response to lipoteichoic acid (GO:0071223)	0.0193424	0.070436	0	0	12.7586	50.3386	MAPK14;RELA
GO_Biological_Process_2021	foam cell differentiation (GO:0090077)	0.0193424	0.070436	0	0	12.7586	50.3386	TGFB1;PPARG
GO_Biological_Process_2021	glomerulus vasculature development (GO:0072012)	0.0193424	0.070436	0	0	12.7586	50.3386	ANGPT2;ANGPT1
GO_Biological_Process_2021	glycerol ether biosynthetic process (GO:0046504)	0.0193424	0.070436	0	0	12.7586	50.3386	DHRS7B;AGPS
GO_Biological_Process_2021	histone-serine phosphorylation (GO:0035404)	0.0193424	0.070436	0	0	12.7586	50.3386	RPS6KA5;MST1
GO_Biological_Process_2021	macrophage derived foam cell differentiation (GO:0010742)	0.0193424	0.070436	0	0	12.7586	50.3386	TGFB1;PPARG
GO_Biological_Process_2021	morphogenesis of an endothelium (GO:0003159)	0.0193424	0.070436	0	0	12.7586	50.3386	CTNNB1;RHOB
GO_Biological_Process_2021	negative regulation of astrocyte differentiation (GO:0048712)	0.0193424	0.070436	0	0	12.7586	50.3386	NOG;F2
GO_Biological_Process_2021	negative regulation of cell size (GO:0045792)	0.0193424	0.070436	0	0	12.7586	50.3386	PTEN;RHOA
GO_Biological_Process_2021	negative regulation of establishment of protein localization to mitochondrion (GO:1903748)	0.0193424	0.070436	0	0	12.7586	50.3386	LRRK2;MAPT
GO_Biological_Process_2021	negative regulation of excitatory postsynaptic potential (GO:0090394)	0.0193424	0.070436	0	0	12.7586	50.3386	LRRK2;PTEN
GO_Biological_Process_2021	negative regulation of sequestering of triglyceride (GO:0010891)	0.0193424	0.070436	0	0	12.7586	50.3386	PPARG;PPARA
GO_Biological_Process_2021	peroxisome proliferator activated receptor signaling pathway (GO:0035357)	0.0193424	0.070436	0	0	12.7586	50.3386	RXRA;PPARG
GO_Biological_Process_2021	positive regulation of cell-cell adhesion mediated by integrin (GO:0033634)	0.0193424	0.070436	0	0	12.7586	50.3386	CXCL13;SKAP1
GO_Biological_Process_2021	positive regulation of deacetylase activity (GO:0090045)	0.0193424	0.070436	0	0	12.7586	50.3386	PRKD1;VEGFA
GO_Biological_Process_2021	positive regulation of endoplasmic reticulum stress-induced intrinsic apoptotic signaling pathway (GO:1902237)	0.0193424	0.070436	0	0	12.7586	50.3386	DDIT3;BOK
GO_Biological_Process_2021	positive regulation of fever generation (GO:0031622)	0.0193424	0.070436	0	0	12.7586	50.3386	PTGS2;TNF
GO_Biological_Process_2021	positive regulation of focal adhesion disassembly (GO:0120183)	0.0193424	0.070436	0	0	12.7586	50.3386	DUSP3;MAPRE2
GO_Biological_Process_2021	positive regulation of I-kappaB phosphorylation (GO:1903721)	0.0193424	0.070436	0	0	12.7586	50.3386	AKT1;TNF
GO_Biological_Process_2021	positive regulation of killing of cells of other organism (GO:0051712)	0.0193424	0.070436	0	0	12.7586	50.3386	SYK;NOS2
GO_Biological_Process_2021	positive regulation of plasminogen activation (GO:0010756)	0.0193424	0.070436	0	0	12.7586	50.3386	F12;HPN
GO_Biological_Process_2021	positive regulation of sterol transport (GO:0032373)	0.0193424	0.070436	0	0	12.7586	50.3386	CETP;NR1H2
GO_Biological_Process_2021	regulation of cardiac muscle hypertrophy in response to stress (GO:1903242)	0.0193424	0.070436	0	0	12.7586	50.3386	LMNA;FOXO1
GO_Biological_Process_2021	regulation of focal adhesion disassembly (GO:0120182)	0.0193424	0.070436	0	0	12.7586	50.3386	DUSP3;MAPRE2
GO_Biological_Process_2021	regulation of hydrogen peroxide metabolic process (GO:0010310)	0.0193424	0.070436	0	0	12.7586	50.3386	RAC2;RAC1
GO_Biological_Process_2021	regulation of macromolecule biosynthetic process (GO:0010556)	0.0193424	0.070436	0	0	12.7586	50.3386	IFNB1;MITF
GO_Biological_Process_2021	regulation of superoxide metabolic process (GO:0090322)	0.0193424	0.070436	0	0	12.7586	50.3386	DHFR;SYK
GO_Biological_Process_2021	regulation of vitamin D biosynthetic process (GO:0060556)	0.0193424	0.070436	0	0	12.7586	50.3386	TNF;NFKB1
GO_Biological_Process_2021	response to lipoteichoic acid (GO:0070391)	0.0193424	0.070436	0	0	12.7586	50.3386	MAPK14;RELA
GO_Biological_Process_2021	response to peptidoglycan (GO:0032494)	0.0193424	0.070436	0	0	12.7586	50.3386	IL6;RELA
GO_Biological_Process_2021	succinate transmembrane transport (GO:0071422)	0.0193424	0.070436	0	0	12.7586	50.3386	SLC25A10;SLC25A11
GO_Biological_Process_2021	glycogen metabolic process (GO:0005977)	0.0201538	0.0727814	0	0	4.25975	16.6316	GYS2;GSK3B;GYS1;PRKAG2
GO_Biological_Process_2021	negative regulation of calcium ion transmembrane transporter activity (GO:1901020)	0.0201538	0.0727814	0	0	4.25975	16.6316	YWHAE;FKBP1A;FKBP1B;CALM2
GO_Biological_Process_2021	nucleotide-binding oligomerization domain containing signaling pathway (GO:0070423)	0.0201538	0.0727814	0	0	4.25975	16.6316	CYLD;CASP8;TAB1;RELA
GO_Biological_Process_2021	positive regulation of fibroblast proliferation (GO:0048146)	0.0201538	0.0727814	0	0	4.25975	16.6316	PDGFRA;PLA2G1B;CDK4;FN1
GO_Biological_Process_2021	positive regulation of microtubule polymerization (GO:0031116)	0.0201538	0.0727814	0	0	4.25975	16.6316	RAC1;MAPT;MAPRE1;MET
GO_Biological_Process_2021	protein localization to Golgi apparatus (GO:0034067)	0.0201538	0.0727814	0	0	4.25975	16.6316	ARL5B;ARL5C;ARL1;ARL5A
GO_Biological_Process_2021	regulation of calcium-mediated signaling (GO:0050848)	0.0201538	0.0727814	0	0	4.25975	16.6316	RIT2;LRRK2;ITPR1;MAPT
GO_Biological_Process_2021	regulation of DNA damage response, signal transduction by p53 class mediator (GO:0043516)	0.0201538	0.0727814	0	0	4.25975	16.6316	SPRED1;DYRK1A;TWIST1;ATM
GO_Biological_Process_2021	regulation of protein transport (GO:0051223)	0.0201538	0.0727814	0	0	4.25975	16.6316	PTPN1;TNF;PPM1F;INS
GO_Biological_Process_2021	cellular response to peptide (GO:1901653)	0.0202252	0.0727814	0	0	3.01067	11.7441	APP;GSK3B;LRP1;SRC;TP53;ICAM1
GO_Biological_Process_2021	dicarboxylic acid metabolic process (GO:0043648)	0.0202252	0.0727814	0	0	3.01067	11.7441	DHFR;ACLY;MTRR;TAT;GPT2;IDH1
GO_Biological_Process_2021	monocarboxylic acid transport (GO:0015718)	0.0202252	0.0727814	0	0	3.01067	11.7441	SLCO1B1;RXRA;SLC10A1;SLCO1B3;NR1H4;UGT1A3
GO_Biological_Process_2021	positive regulation of proteolysis (GO:0045862)	0.0202252	0.0727814	0	0	3.01067	11.7441	ATP5IF1;CASP8;PLK1;PRSS22;TNF;MAPK12
GO_Biological_Process_2021	regulation of DNA recombination (GO:0000018)	0.0203991	0.0732741	0	0	3.45611	13.4521	IL10;BLM;PPP4C;RAD51;CHEK1
GO_Biological_Process_2021	translesion synthesis (GO:0019985)	0.0203991	0.0732741	0	0	3.45611	13.4521	PCNA;REV1;POLI;POLK;POLH
GO_Biological_Process_2021	cellular amino acid catabolic process (GO:0009063)	0.020513	0.0735498	0	0	2.49928	9.71395	MTRR;NOS2;NOS3;HDC;GAD1;CARNS1;KYAT1;HSD17B10
GO_Biological_Process_2021	positive regulation of autophagy (GO:0010508)	0.020513	0.0735498	0	0	2.49928	9.71395	GSK3B;PRKAA2;DHRSX;ROCK1;LRRK2;HMGB1;PRKD1;FOXO1
GO_Biological_Process_2021	basement membrane organization (GO:0071711)	0.0208531	0.0738998	0	0	5.89366	22.8099	CMA1;HPN;NID1
GO_Biological_Process_2021	glutamine family amino acid catabolic process (GO:0009065)	0.0208531	0.0738998	0	0	5.89366	22.8099	NOS2;NOS3;GAD1
GO_Biological_Process_2021	negative regulation of histone modification (GO:0031057)	0.0208531	0.0738998	0	0	5.89366	22.8099	SDR16C5;TWIST1;BRCA1
GO_Biological_Process_2021	negative regulation of telomere maintenance (GO:0032205)	0.0208531	0.0738998	0	0	5.89366	22.8099	PARP1;ERCC1;ATM
GO_Biological_Process_2021	neutrophil activation (GO:0042119)	0.0208531	0.0738998	0	0	5.89366	22.8099	CXCL8;SYK;PRKCD
GO_Biological_Process_2021	platelet-derived growth factor receptor signaling pathway (GO:0048008)	0.0208531	0.0738998	0	0	5.89366	22.8099	PTPN1;PDGFRA;PLAT
GO_Biological_Process_2021	positive regulation by host of viral transcription (GO:0043923)	0.0208531	0.0738998	0	0	5.89366	22.8099	JUN;SP1;HPN
GO_Biological_Process_2021	positive regulation of collagen biosynthetic process (GO:0032967)	0.0208531	0.0738998	0	0	5.89366	22.8099	TGFB1;F2;LARP6
GO_Biological_Process_2021	purine ribonucleoside monophosphate biosynthetic process (GO:0009168)	0.0208531	0.0738998	0	0	5.89366	22.8099	IMPDH1;IMPDH2;GART
GO_Biological_Process_2021	regulation of blood vessel endothelial cell proliferation involved in sprouting angiogenesis (GO:1903587)	0.0208531	0.0738998	0	0	5.89366	22.8099	HMOX1;GATA2;VEGFA
GO_Biological_Process_2021	regulation of ERBB signaling pathway (GO:1901184)	0.0208531	0.0738998	0	0	5.89366	22.8099	EGF;ERBB2;EGFR
GO_Biological_Process_2021	regulation of establishment of cell polarity (GO:2000114)	0.0208531	0.0738998	0	0	5.89366	22.8099	RAP1B;ROCK1;ROCK2
GO_Biological_Process_2021	regulation of fatty acid oxidation (GO:0046320)	0.0208531	0.0738998	0	0	5.89366	22.8099	SIRT4;PRKAG2;PPARA
GO_Biological_Process_2021	negative regulation of transmembrane receptor protein serine/threonine kinase signaling pathway (GO:0090101)	0.0212136	0.0751102	0	0	2.32993	8.97747	FKBP1A;PPM1A;SPRED1;TGFB1;PDPK1;NOG;PIN1;PPARG;PPARA
GO_Biological_Process_2021	innate immune response (GO:0045087)	0.0213749	0.0756138	0	0	1.72727	6.64229	CFD;LYN;APP;APOBEC3G;SYK;NOS2;SRC;PLA2G1B;F12;RNASE3;HMGB1;RELA;FGR;CYLD;LCK;PPARG;MASP2;MASP1;CFB
GO_Biological_Process_2021	chordate embryonic development (GO:0043009)	0.021862	0.0771991	0	0	2.95262	11.2879	MBNL1;TGFB1;NOG;BRCA1;GATA3;VEGFA
GO_Biological_Process_2021	positive regulation of mitochondrion organization (GO:0010822)	0.021862	0.0771991	0	0	2.95262	11.2879	GSK3B;RALA;BAX;MMP9;TP53;BOK
GO_Biological_Process_2021	DNA synthesis involved in DNA repair (GO:0000731)	0.0223874	0.0788435	0	0	3.36499	12.7844	PCNA;REV1;POLI;POLK;POLH
GO_Biological_Process_2021	signal release from synapse (GO:0099643)	0.0223874	0.0788435	0	0	3.36499	12.7844	STXBP3;STXBP1;GAD1;STXBP2;GAD2
GO_Biological_Process_2021	substantia nigra development (GO:0021762)	0.0223874	0.0788435	0	0	3.36499	12.7844	YWHAE;CDC42;CKB;CALM2;RHOA
GO_Biological_Process_2021	lipid catabolic process (GO:0016042)	0.0226979	0.0796537	0	0	4.08915	15.4794	PLA2G1B;CYP1A2;HSD17B14;CYP3A4
GO_Biological_Process_2021	negative regulation of wound healing (GO:0061045)	0.0226979	0.0796537	0	0	4.08915	15.4794	PROC;SERPINE1;PTEN;TNF
GO_Biological_Process_2021	positive regulation of viral genome replication (GO:0045070)	0.0226979	0.0796537	0	0	4.08915	15.4794	TOP2A;TOP2B;HACD3;PPARA
GO_Biological_Process_2021	regulation of calcium ion transmembrane transporter activity (GO:1901019)	0.0226979	0.0796537	0	0	4.08915	15.4794	YWHAE;FKBP1A;FKBP1B;CALM2
GO_Biological_Process_2021	positive regulation of cellular component biogenesis (GO:0044089)	0.0230867	0.0808748	0	0	2.43952	9.19333	GSK3B;TGFB1;SYK;ERCC1;BAX;PRKCA;TNF;VEGFA
GO_Biological_Process_2021	Wnt signaling pathway (GO:0016055)	0.0230867	0.0808748	0	0	2.43952	9.19333	GSK3B;ARL6;CSNK1A1;LRRK2;PTEN;RAC3;CTNNB1;PLPP3
GO_Biological_Process_2021	negative regulation of epidermal growth factor receptor signaling pathway (GO:0042059)	0.0244971	0.0850886	0	0	3.27853	12.1607	CDC42;DUSP3;EGF;EGFR;PTPN2
GO_Biological_Process_2021	neurotransmitter secretion (GO:0007269)	0.0244971	0.0850886	0	0	3.27853	12.1607	STXBP3;STXBP1;GAD1;STXBP2;GAD2
GO_Biological_Process_2021	positive regulation of cell division (GO:0051781)	0.0244971	0.0850886	0	0	3.27853	12.1607	CDC42;CUL3;RHOA;NKX3-1;CDC25B
GO_Biological_Process_2021	positive regulation of receptor-mediated endocytosis (GO:0048260)	0.0244971	0.0850886	0	0	3.27853	12.1607	ANGPT1;EGF;SERPINE1;SELE;VEGFA
GO_Biological_Process_2021	cellular response to gamma radiation (GO:0071480)	0.0246248	0.0850886	0	0	5.4724	20.2698	ATM;HRAS;TP53
GO_Biological_Process_2021	mitochondrial electron transport, cytochrome c to oxygen (GO:0006123)	0.0246248	0.0850886	0	0	5.4724	20.2698	CYCS;COX6A1;COX6A2
GO_Biological_Process_2021	negative regulation of chemokine production (GO:0032682)	0.0246248	0.0850886	0	0	5.4724	20.2698	IL10;IL6;ELANE
GO_Biological_Process_2021	negative regulation of cytokine production involved in immune response (GO:0002719)	0.0246248	0.0850886	0	0	5.4724	20.2698	IL10;TGFB1;TNF
GO_Biological_Process_2021	negative regulation of peptidyl-threonine phosphorylation (GO:0010801)	0.0246248	0.0850886	0	0	5.4724	20.2698	SPRED1;PPEF2;CALM2
GO_Biological_Process_2021	negative regulation of phagocytosis (GO:0050765)	0.0246248	0.0850886	0	0	5.4724	20.2698	ADIPOQ;PRTN3;HMGB1
GO_Biological_Process_2021	positive regulation of collagen metabolic process (GO:0010714)	0.0246248	0.0850886	0	0	5.4724	20.2698	TGFB1;F2;LARP6
GO_Biological_Process_2021	positive regulation of telomere capping (GO:1904355)	0.0246248	0.0850886	0	0	5.4724	20.2698	MAPK1;MAPKAPK5;MAPK15
GO_Biological_Process_2021	regulation of cell killing (GO:0031341)	0.0246248	0.0850886	0	0	5.4724	20.2698	IL10;RAC1;ICAM1
GO_Biological_Process_2021	regulation of neuroblast proliferation (GO:1902692)	0.0246248	0.0850886	0	0	5.4724	20.2698	LRRK2;CTNNB1;VEGFA
GO_Biological_Process_2021	cellular response to hormone stimulus (GO:0032870)	0.0246332	0.0850886	0	0	2.59718	9.61908	AR;THRB;SRC;STAT3;NR3C1;GATA1;NKX3-1
GO_Biological_Process_2021	phospholipid metabolic process (GO:0006644)	0.0246332	0.0850886	0	0	2.59718	9.61908	PLPPR2;GPAM;IDI2;PGP;PLPP3;PLPP2;PLPP1
GO_Biological_Process_2021	alpha-amino acid catabolic process (GO:1901606)	0.0254287	0.0867547	0	0	3.93167	14.4366	MTRR;TAT;KYAT1;HSD17B10
GO_Biological_Process_2021	artery morphogenesis (GO:0048844)	0.0254287	0.0867547	0	0	3.93167	14.4366	HPGD;LRP1;NOG;VEGFA
GO_Biological_Process_2021	extrinsic apoptotic signaling pathway via death domain receptors (GO:0008625)	0.0254287	0.0867547	0	0	3.93167	14.4366	CASP8;BCL2;BAX;TNF
GO_Biological_Process_2021	negative regulation of Notch signaling pathway (GO:0045746)	0.0254287	0.0867547	0	0	3.93167	14.4366	EGF;AKT1;GATA2;EGFR
GO_Biological_Process_2021	positive regulation of small GTPase mediated signal transduction (GO:0051057)	0.0254287	0.0867547	0	0	3.93167	14.4366	LYN;SRC;JAK2;TGM2
GO_Biological_Process_2021	regulation of type I interferon-mediated signaling pathway (GO:0060338)	0.0254287	0.0867547	0	0	3.93167	14.4366	PTPN1;PTPN11;PTPN6;PTPN2
GO_Biological_Process_2021	positive regulation of canonical Wnt signaling pathway (GO:0090263)	0.0257768	0.0867547	0	0	2.13628	7.81512	PPM1A;PPM1B;TGFB1;EGF;LRRK2;PPM1N;PIN1;ILK;NFKB1;EGFR
GO_Biological_Process_2021	negative regulation of cellular protein metabolic process (GO:0032269)	0.0258794	0.0867547	0	0	2.38254	8.70653	DHFR;GRB7;AKT1;GZMB;PLAT;F2;NFKB1;INS
GO_Biological_Process_2021	regulation of macroautophagy (GO:0016241)	0.0261426	0.0867547	0	0	2.23898	8.15925	PRKAA2;PIK3CA;RHEB;LRRK2;CASP3;PRKAG1;AKT1;PRKAG2;PRKAG3
GO_Biological_Process_2021	negative regulation of developmental process (GO:0051093)	0.0262463	0.0867547	0	0	2.55995	9.3188	VAT1;TGFB1;ROCK1;ROCK2;NOS3;MAPT;NKX3-1
GO_Biological_Process_2021	neutrophil migration (GO:1990266)	0.0262463	0.0867547	0	0	2.55995	9.3188	CXCL8;SYK;PLA2G1B;CCL20;PRTN3;CXCL13;CXCL2
GO_Biological_Process_2021	positive regulation of protein modification by small protein conjugation or removal (GO:1903322)	0.0262463	0.0867547	0	0	2.55995	9.3188	RASD2;FKBP1A;ANGPT1;LRRK2;CUL3;BRCA1;SAE1
GO_Biological_Process_2021	cellular nitrogen compound catabolic process (GO:0044270)	0.0264074	0.0867547	0	0	10.2064	37.0911	CYP2D6;CYP3A4
GO_Biological_Process_2021	complement activation, alternative pathway (GO:0006957)	0.0264074	0.0867547	0	0	10.2064	37.0911	CFD;CFB
GO_Biological_Process_2021	creatine metabolic process (GO:0006600)	0.0264074	0.0867547	0	0	10.2064	37.0911	CKM;CKB
GO_Biological_Process_2021	dolichyl diphosphate biosynthetic process (GO:0006489)	0.0264074	0.0867547	0	0	10.2064	37.0911	DOLPP1;MVD
GO_Biological_Process_2021	dolichyl diphosphate metabolic process (GO:0046465)	0.0264074	0.0867547	0	0	10.2064	37.0911	DOLPP1;MVD
GO_Biological_Process_2021	gland morphogenesis (GO:0022612)	0.0264074	0.0867547	0	0	10.2064	37.0911	TGFB1;EZR
GO_Biological_Process_2021	glial cell migration (GO:0008347)	0.0264074	0.0867547	0	0	10.2064	37.0911	P2RY12;AZU1
GO_Biological_Process_2021	hemostasis (GO:0007599)	0.0264074	0.0867547	0	0	10.2064	37.0911	P2RY12;NFE2
GO_Biological_Process_2021	keratinocyte proliferation (GO:0043616)	0.0264074	0.0867547	0	0	10.2064	37.0911	SDR16C5;KLK8
GO_Biological_Process_2021	lipid hydroxylation (GO:0002933)	0.0264074	0.0867547	0	0	10.2064	37.0911	CYP1A1;CYP3A4
GO_Biological_Process_2021	lipoxin biosynthetic process (GO:2001301)	0.0264074	0.0867547	0	0	10.2064	37.0911	HPGD;ALOX15
GO_Biological_Process_2021	modulation by symbiont of host apoptotic process (GO:0052150)	0.0264074	0.0867547	0	0	10.2064	37.0911	MAPK1;CTSG
GO_Biological_Process_2021	negative regulation of acute inflammatory response (GO:0002674)	0.0264074	0.0867547	0	0	10.2064	37.0911	NLRP3;INS
GO_Biological_Process_2021	negative regulation of centriole replication (GO:0046600)	0.0264074	0.0867547	0	0	10.2064	37.0911	KAT2A;BRCA1
GO_Biological_Process_2021	negative regulation of glycogen metabolic process (GO:0070874)	0.0264074	0.0867547	0	0	10.2064	37.0911	GSK3B;INS
GO_Biological_Process_2021	negative regulation of heart rate (GO:0010459)	0.0264074	0.0867547	0	0	10.2064	37.0911	FKBP1B;SPX
GO_Biological_Process_2021	negative regulation of low-density lipoprotein receptor activity (GO:1905598)	0.0264074	0.0867547	0	0	10.2064	37.0911	APP;ADIPOQ
GO_Biological_Process_2021	negative regulation of membrane protein ectodomain proteolysis (GO:0051045)	0.0264074	0.0867547	0	0	10.2064	37.0911	IL10;ROCK1
GO_Biological_Process_2021	negative regulation of neurotransmitter secretion (GO:0046929)	0.0264074	0.0867547	0	0	10.2064	37.0911	RAP1B;RAP1A
GO_Biological_Process_2021	negative regulation of p38MAPK cascade (GO:1903753)	0.0264074	0.0867547	0	0	10.2064	37.0911	CYLD;EZR
GO_Biological_Process_2021	negative regulation of steroid metabolic process (GO:0045939)	0.0264074	0.0867547	0	0	10.2064	37.0911	UGT1A1;UGT1A8
GO_Biological_Process_2021	negative regulation of telomere capping (GO:1904354)	0.0264074	0.0867547	0	0	10.2064	37.0911	ERCC1;ATM
GO_Biological_Process_2021	positive regulation of amyloid-beta clearance (GO:1900223)	0.0264074	0.0867547	0	0	10.2064	37.0911	ROCK1;LRP1
GO_Biological_Process_2021	positive regulation of aspartic-type endopeptidase activity involved in amyloid precursor protein catabolic process (GO:1902961)	0.0264074	0.0867547	0	0	10.2064	37.0911	LYN;ROCK2
GO_Biological_Process_2021	positive regulation of chemokine (C-X-C motif) ligand 2 production (GO:2000343)	0.0264074	0.0867547	0	0	10.2064	37.0911	HMGB1;TNF
GO_Biological_Process_2021	positive regulation of epithelial tube formation (GO:1905278)	0.0264074	0.0867547	0	0	10.2064	37.0911	EGF;GATA3
GO_Biological_Process_2021	positive regulation of gliogenesis (GO:0014015)	0.0264074	0.0867547	0	0	10.2064	37.0911	IL6;TNF
GO_Biological_Process_2021	positive regulation of IRE1-mediated unfolded protein response (GO:1903896)	0.0264074	0.0867547	0	0	10.2064	37.0911	PTPN1;BAX
GO_Biological_Process_2021	positive regulation of podosome assembly (GO:0071803)	0.0264074	0.0867547	0	0	10.2064	37.0911	CSF2;TNF
GO_Biological_Process_2021	positive regulation of RNA polymerase II transcription preinitiation complex assembly (GO:0045899)	0.0264074	0.0867547	0	0	10.2064	37.0911	ESR1;TP53
GO_Biological_Process_2021	protection from non-homologous end joining at telomere (GO:0031848)	0.0264074	0.0867547	0	0	10.2064	37.0911	DCLRE1A;DCLRE1C
GO_Biological_Process_2021	regulation of blood-brain barrier permeability (GO:1905603)	0.0264074	0.0867547	0	0	10.2064	37.0911	ANGPT1;VEGFA
GO_Biological_Process_2021	regulation of glial cell apoptotic process (GO:0034350)	0.0264074	0.0867547	0	0	10.2064	37.0911	PRKCD;PRKCA
GO_Biological_Process_2021	regulation of glycogen (starch) synthase activity (GO:2000465)	0.0264074	0.0867547	0	0	10.2064	37.0911	GSK3B;ADIPOQ
GO_Biological_Process_2021	regulation of histone deacetylase activity (GO:1901725)	0.0264074	0.0867547	0	0	10.2064	37.0911	PRKD1;VEGFA
GO_Biological_Process_2021	regulation of I-kappaB phosphorylation (GO:1903719)	0.0264074	0.0867547	0	0	10.2064	37.0911	AKT1;TNF
GO_Biological_Process_2021	regulation of microtubule binding (GO:1904526)	0.0264074	0.0867547	0	0	10.2064	37.0911	PPP2CA;PPP2CB
GO_Biological_Process_2021	regulation of NAD(P)H oxidase activity (GO:0033860)	0.0264074	0.0867547	0	0	10.2064	37.0911	RFK;INS
GO_Biological_Process_2021	regulation of oxidative stress-induced neuron intrinsic apoptotic signaling pathway (GO:1903376)	0.0264074	0.0867547	0	0	10.2064	37.0911	HIF1A;MCL1
GO_Biological_Process_2021	regulation of potassium ion export across plasma membrane (GO:1903764)	0.0264074	0.0867547	0	0	10.2064	37.0911	KCNH2;NPPA
GO_Biological_Process_2021	regulation of T cell mediated immune response to tumor cell (GO:0002840)	0.0264074	0.0867547	0	0	10.2064	37.0911	HMGB1;AHR
GO_Biological_Process_2021	regulation of transforming growth factor beta2 production (GO:0032909)	0.0264074	0.0867547	0	0	10.2064	37.0911	GATA6;HIF1A
GO_Biological_Process_2021	regulation of tubulin deacetylation (GO:0090043)	0.0264074	0.0867547	0	0	10.2064	37.0911	PRKAA2;MAPT
GO_Biological_Process_2021	SMAD protein complex assembly (GO:0007183)	0.0264074	0.0867547	0	0	10.2064	37.0911	FKBP1A;TGFB1
GO_Biological_Process_2021	succinate transport (GO:0015744)	0.0264074	0.0867547	0	0	10.2064	37.0911	SLC25A10;SLC25A11
GO_Biological_Process_2021	vascular wound healing (GO:0061042)	0.0264074	0.0867547	0	0	10.2064	37.0911	GATA2;VEGFA
GO_Biological_Process_2021	xenobiotic catabolic process (GO:0042178)	0.0264074	0.0867547	0	0	10.2064	37.0911	GSTM3;CRYZ
GO_Biological_Process_2021	cellular response to radiation (GO:0071478)	0.0267305	0.0876706	0	0	3.1964	11.5772	BLM;RAD51;MAPK14;TP53;RHOB
GO_Biological_Process_2021	chromosome condensation (GO:0030261)	0.0267305	0.0876706	0	0	3.1964	11.5772	RB1;TOP2A;CSNK2A1;PLK1;CSNK2A2
GO_Biological_Process_2021	cellular response to hypoxia (GO:0071456)	0.0270012	0.0884853	0	0	2.11852	7.65181	ANGPT4;LMNA;GATA6;TWIST1;HMOX1;PTGS2;TP53;HIF1A;NKX3-1;VEGFA
GO_Biological_Process_2021	regulation of endocytosis (GO:0030100)	0.0273016	0.0893958	0	0	2.79113	10.0503	PTPN1;RIT2;ROCK1;LRP1;SRC;PRKD1
GO_Biological_Process_2021	negative regulation of blood vessel morphogenesis (GO:2000181)	0.0279299	0.0913021	0	0	2.52376	9.03016	ANGPT4;SPRED1;ROCK1;ROCK2;CTNNB1;PPARG;KLK3
GO_Biological_Process_2021	protein modification process (GO:0036211)	0.0279299	0.0913021	0	0	2.52376	9.03016	TGM1;PARP1;PLAT;NEDD8;TGM5;PHEX;TGM3
GO_Biological_Process_2021	cellular response to cAMP (GO:0071320)	0.0283487	0.0921211	0	0	3.78586	13.4897	RAP1B;RAP1A;AHR;EZR
GO_Biological_Process_2021	positive regulation of locomotion (GO:0040017)	0.0283487	0.0921211	0	0	3.78586	13.4897	P2RY12;TGFB1;TWIST1;PPM1F
GO_Biological_Process_2021	positive regulation of protein targeting to mitochondrion (GO:1903955)	0.0283487	0.0921211	0	0	3.78586	13.4897	CSNK2A2;RAC2;RHOU;SAE1
GO_Biological_Process_2021	embryonic digit morphogenesis (GO:0042733)	0.0287384	0.0921211	0	0	5.1073	18.1285	HDAC1;NOG;TWIST1
GO_Biological_Process_2021	leukocyte tethering or rolling (GO:0050901)	0.0287384	0.0921211	0	0	5.1073	18.1285	ROCK1;TNF;SELE
GO_Biological_Process_2021	melanosome transport (GO:0032402)	0.0287384	0.0921211	0	0	5.1073	18.1285	ARL6;RAB11A;RAB11B
GO_Biological_Process_2021	negative regulation of biosynthetic process (GO:0009890)	0.0287384	0.0921211	0	0	5.1073	18.1285	IL6;PPARA;INS
GO_Biological_Process_2021	negative regulation of leukocyte cell-cell adhesion (GO:1903038)	0.0287384	0.0921211	0	0	5.1073	18.1285	DUSP3;AKT1;PPARA
GO_Biological_Process_2021	negative regulation of lipid catabolic process (GO:0050995)	0.0287384	0.0921211	0	0	5.1073	18.1285	AKT1;TNF;INS
GO_Biological_Process_2021	nitric oxide mediated signal transduction (GO:0007263)	0.0287384	0.0921211	0	0	5.1073	18.1285	NOS2;NOS3;INS
GO_Biological_Process_2021	pigment granule transport (GO:0051904)	0.0287384	0.0921211	0	0	5.1073	18.1285	ARL6;RAB11A;RAB11B
GO_Biological_Process_2021	positive chemotaxis (GO:0050918)	0.0287384	0.0921211	0	0	5.1073	18.1285	ANGPT1;MET;VEGFA
GO_Biological_Process_2021	positive regulation of CREB transcription factor activity (GO:0032793)	0.0287384	0.0921211	0	0	5.1073	18.1285	RPS6KA5;PRKD1;VEGFA
GO_Biological_Process_2021	positive regulation of extracellular matrix organization (GO:1903055)	0.0287384	0.0921211	0	0	5.1073	18.1285	RB1;IL6;TGFB1
GO_Biological_Process_2021	positive regulation of interleukin-4 production (GO:0032753)	0.0287384	0.0921211	0	0	5.1073	18.1285	SYK;NLRP3;GATA3
GO_Biological_Process_2021	positive regulation of macrophage derived foam cell differentiation (GO:0010744)	0.0287384	0.0921211	0	0	5.1073	18.1285	MAPK9;CSF2;NFKB1
GO_Biological_Process_2021	positive regulation of response to endoplasmic reticulum stress (GO:1905898)	0.0287384	0.0921211	0	0	5.1073	18.1285	DDIT3;BAX;BOK
GO_Biological_Process_2021	positive regulation of stress-activated protein kinase signaling cascade (GO:0070304)	0.0287384	0.0921211	0	0	5.1073	18.1285	LYN;TAOK3;KLHDC10
GO_Biological_Process_2021	regulation of adaptive immune response (GO:0002819)	0.0287384	0.0921211	0	0	5.1073	18.1285	ALOX15;AHR;SKAP1
GO_Biological_Process_2021	regulation of brown fat cell differentiation (GO:0090335)	0.0287384	0.0921211	0	0	5.1073	18.1285	PIM1;PTGS2;INS
GO_Biological_Process_2021	regulation of establishment or maintenance of cell polarity (GO:0032878)	0.0287384	0.0921211	0	0	5.1073	18.1285	RAP1B;ROCK1;ROCK2
GO_Biological_Process_2021	regulation of mitochondrial outer membrane permeabilization involved in apoptotic signaling pathway (GO:1901028)	0.0287384	0.0921211	0	0	5.1073	18.1285	GSK3B;BAX;BOK
GO_Biological_Process_2021	regulation of protein sumoylation (GO:0033233)	0.0287384	0.0921211	0	0	5.1073	18.1285	RASD2;CTNNB1;SAE1
GO_Biological_Process_2021	regulation of transforming growth factor beta production (GO:0071634)	0.0287384	0.0921211	0	0	5.1073	18.1285	FN1;PTGS2;HIF1A
GO_Biological_Process_2021	negative regulation of tumor necrosis factor production (GO:0032720)	0.0290895	0.0931709	0	0	3.11828	11.0305	IL10;ARG2;ADIPOQ;NR1H4;PTPN6
GO_Biological_Process_2021	cell cycle G1/S phase transition (GO:0044843)	0.031385	0.0998748	0	0	2.69291	9.32132	RB1;CCND1;RPS6KB1;CDK4;CUL3;CDK2
GO_Biological_Process_2021	organonitrogen compound catabolic process (GO:1901565)	0.031385	0.0998748	0	0	2.69291	9.32132	SGPL1;CTRL;CYP2D6;GADL1;CYP3A4;ELANE
GO_Biological_Process_2021	B cell proliferation (GO:0042100)	0.0314598	0.0998748	0	0	3.65046	12.6271	IL10;PTPRC;IFNB1;BCL2
GO_Biological_Process_2021	establishment or maintenance of epithelial cell apical/basal polarity (GO:0045197)	0.0314598	0.0998748	0	0	3.65046	12.6271	CDC42;RAP2A;EZR;RHOA
GO_Biological_Process_2021	hematopoietic progenitor cell differentiation (GO:0002244)	0.0314598	0.0998748	0	0	3.65046	12.6271	TGFB1;PTPRC;TP53;BATF
GO_Biological_Process_2021	modulation by host of symbiont process (GO:0051851)	0.0314598	0.0998748	0	0	3.65046	12.6271	JUN;HDAC1;SP1;HPN
GO_Biological_Process_2021	negative regulation of chemotaxis (GO:0050922)	0.0314598	0.0998748	0	0	3.65046	12.6271	DUSP3;ANGPT2;ELANE;PTPN2
GO_Biological_Process_2021	peptidyl-proline modification (GO:0018208)	0.0314598	0.0998748	0	0	3.65046	12.6271	FKBP1A;FKBP1B;PPWD1;PIN1
GO_Biological_Process_2021	positive regulation of interleukin-10 production (GO:0032733)	0.0314598	0.0998748	0	0	3.65046	12.6271	IL6;SYK;STAT3;HMGB1
GO_Biological_Process_2021	regulation of intracellular estrogen receptor signaling pathway (GO:0033146)	0.0314598	0.0998748	0	0	3.65046	12.6271	CBFB;GPAM;BRCA1;ESR1
GO_Biological_Process_2021	regulation of transcription involved in G1/S transition of mitotic cell cycle (GO:0000083)	0.0314598	0.0998748	0	0	3.65046	12.6271	RB1;DHFR;PCNA;CDC45
GO_Biological_Process_2021	skin development (GO:0043588)	0.0315134	0.099965	0	0	2.45436	8.48556	TGM1;ST14;CASP3;GATA6;TXNIP;MET;TGM3
GO_Biological_Process_2021	telomere organization (GO:0032200)	0.0315759	0.100083	0	0	3.04388	10.5177	BLM;PCNA;PARP1;APEX1;ATM
GO_Biological_Process_2021	DNA alkylation (GO:0006305)	0.0331918	0.103383	0	0	4.78785	16.3048	MTRR;EHMT2;PPM1D
GO_Biological_Process_2021	DNA double-strand break processing (GO:0000729)	0.0331918	0.103383	0	0	4.78785	16.3048	BLM;ATM;BRCA1
GO_Biological_Process_2021	DNA methylation or demethylation (GO:0044728)	0.0331918	0.103383	0	0	4.78785	16.3048	MTRR;EHMT2;PPM1D
GO_Biological_Process_2021	endocardial cushion morphogenesis (GO:0003203)	0.0331918	0.103383	0	0	4.78785	16.3048	NOS3;NOG;GATA5
GO_Biological_Process_2021	establishment of melanosome localization (GO:0032401)	0.0331918	0.103383	0	0	4.78785	16.3048	ARL6;RAB11A;RAB11B
GO_Biological_Process_2021	excitatory postsynaptic potential (GO:0060079)	0.0331918	0.103383	0	0	4.78785	16.3048	GSK3B;LRRK2;AKT1
GO_Biological_Process_2021	leukocyte adhesion to vascular endothelial cell (GO:0061756)	0.0331918	0.103383	0	0	4.78785	16.3048	ROCK1;TNF;SELE
GO_Biological_Process_2021	long-term memory (GO:0007616)	0.0331918	0.103383	0	0	4.78785	16.3048	KAT2A;SLC2A4;SGK1
GO_Biological_Process_2021	N-glycan processing (GO:0006491)	0.0331918	0.103383	0	0	4.78785	16.3048	GANAB;ST8SIA1;GANC
GO_Biological_Process_2021	negative regulation of RNA metabolic process (GO:0051253)	0.0331918	0.103383	0	0	4.78785	16.3048	TGFB1;TNF;ESR1
GO_Biological_Process_2021	negative regulation of T cell receptor signaling pathway (GO:0050860)	0.0331918	0.103383	0	0	4.78785	16.3048	DUSP3;EZR;PTPN2
GO_Biological_Process_2021	positive regulation of neutrophil chemotaxis (GO:0090023)	0.0331918	0.103383	0	0	4.78785	16.3048	CXCL8;RAC2;RAC1
GO_Biological_Process_2021	prostaglandin biosynthetic process (GO:0001516)	0.0331918	0.103383	0	0	4.78785	16.3048	CBR1;PTGS2;PTGS1
GO_Biological_Process_2021	regulation of cell-cell adhesion mediated by cadherin (GO:2000047)	0.0331918	0.103383	0	0	4.78785	16.3048	PLG;PPM1F;VEGFA
GO_Biological_Process_2021	regulation of histone H3-K4 methylation (GO:0051569)	0.0331918	0.103383	0	0	4.78785	16.3048	KMT2A;CTNNB1;BRCA1
GO_Biological_Process_2021	regulation of mitochondrial membrane permeability (GO:0046902)	0.0331918	0.103383	0	0	4.78785	16.3048	BCL2;SLC25A31;BCL2L1
GO_Biological_Process_2021	regulation of nervous system process (GO:0031644)	0.0331918	0.103383	0	0	4.78785	16.3048	APP;NOS3;ROCK2
GO_Biological_Process_2021	response to fatty acid (GO:0070542)	0.0331918	0.103383	0	0	4.78785	16.3048	PPP5C;NR1H4;FOXO1
GO_Biological_Process_2021	antimicrobial humoral immune response mediated by antimicrobial peptide (GO:0061844)	0.033568	0.103383	0	0	2.64634	8.98217	CXCL8;PLA2G1B;RNASE3;CXCL13;F2;CXCL2
GO_Biological_Process_2021	regulation of innate immune response (GO:0045088)	0.033568	0.103383	0	0	2.64634	8.98217	FGR;PTPN1;CASP8;IFNB1;PTPN11;PTPN6
GO_Biological_Process_2021	cellular response to alcohol (GO:0097306)	0.0341913	0.103383	0	0	2.97294	10.036	BLM;RAD51;CTNNB1;BRCA1;AHR
GO_Biological_Process_2021	cognition (GO:0050890)	0.0341913	0.103383	0	0	2.97294	10.036	APP;TMPRSS11E;TNF;INS;CBR3
GO_Biological_Process_2021	negative regulation of MAP kinase activity (GO:0043407)	0.0341913	0.103383	0	0	2.97294	10.036	LYN;PTPN1;NPPA;ADIPOQ;PRKCD
GO_Biological_Process_2021	negative regulation of mitotic cell cycle (GO:0045930)	0.0341913	0.103383	0	0	2.97294	10.036	IL10;TGFB1;CHEK1;CTNNB1;NKX3-1
GO_Biological_Process_2021	negative regulation of tumor necrosis factor superfamily cytokine production (GO:1903556)	0.0341913	0.103383	0	0	2.97294	10.036	IL10;ARG2;ADIPOQ;NR1H4;PTPN6
GO_Biological_Process_2021	regulation of mitochondrion organization (GO:0010821)	0.0341913	0.103383	0	0	2.97294	10.036	GSK3B;LRRK2;CSNK2A2;VDAC1;MAPT
GO_Biological_Process_2021	benzene-containing compound metabolic process (GO:0042537)	0.0343391	0.103383	0	0	8.50486	28.6739	KYAT3;KYAT1
GO_Biological_Process_2021	cellular response to interleukin-21 (GO:0098757)	0.0343391	0.103383	0	0	8.50486	28.6739	STAT3;JAK1
GO_Biological_Process_2021	coronary vasculature morphogenesis (GO:0060977)	0.0343391	0.103383	0	0	8.50486	28.6739	SPRED1;VEGFA
GO_Biological_Process_2021	cytoplasmic sequestering of NF-kappaB (GO:0007253)	0.0343391	0.103383	0	0	8.50486	28.6739	NFKBIA;IL10
GO_Biological_Process_2021	glycoside catabolic process (GO:0016139)	0.0343391	0.103383	0	0	8.50486	28.6739	GUSB;GLA
GO_Biological_Process_2021	histidine catabolic process (GO:0006548)	0.0343391	0.103383	0	0	8.50486	28.6739	HDC;CARNS1
GO_Biological_Process_2021	histidine metabolic process (GO:0006547)	0.0343391	0.103383	0	0	8.50486	28.6739	HDC;CARNS1
GO_Biological_Process_2021	interleukin-21-mediated signaling pathway (GO:0038114)	0.0343391	0.103383	0	0	8.50486	28.6739	STAT3;JAK1
GO_Biological_Process_2021	internal protein amino acid acetylation (GO:0006475)	0.0343391	0.103383	0	0	8.50486	28.6739	KAT2A;MAPT
GO_Biological_Process_2021	lipid import into cell (GO:0140354)	0.0343391	0.103383	0	0	8.50486	28.6739	RPS6KB1;SPX
GO_Biological_Process_2021	myeloid leukocyte mediated immunity (GO:0002444)	0.0343391	0.103383	0	0	8.50486	28.6739	IL6;PLA2G1B
GO_Biological_Process_2021	negative regulation by symbiont of host programmed cell death (GO:0052041)	0.0343391	0.103383	0	0	8.50486	28.6739	MAPK1;CTSG
GO_Biological_Process_2021	negative regulation of alpha-beta T cell differentiation (GO:0046639)	0.0343391	0.103383	0	0	8.50486	28.6739	CBFB;HMGB1
GO_Biological_Process_2021	negative regulation of appetite (GO:0032099)	0.0343391	0.103383	0	0	8.50486	28.6739	SPX;PPARA
GO_Biological_Process_2021	negative regulation of chromosome organization (GO:2001251)	0.0343391	0.103383	0	0	8.50486	28.6739	TOP2A;ERCC1
GO_Biological_Process_2021	negative regulation of fatty acid oxidation (GO:0046322)	0.0343391	0.103383	0	0	8.50486	28.6739	SIRT4;AKT1
GO_Biological_Process_2021	negative regulation of glial cell apoptotic process (GO:0034351)	0.0343391	0.103383	0	0	8.50486	28.6739	PRKCD;PRKCA
GO_Biological_Process_2021	negative regulation of mitochondrial membrane potential (GO:0010917)	0.0343391	0.103383	0	0	8.50486	28.6739	BAX;MAPT
GO_Biological_Process_2021	negative regulation of monooxygenase activity (GO:0032769)	0.0343391	0.103383	0	0	8.50486	28.6739	GLA;NFKB1
GO_Biological_Process_2021	negative regulation of response to reactive oxygen species (GO:1901032)	0.0343391	0.103383	0	0	8.50486	28.6739	LRRK2;NFE2L2
GO_Biological_Process_2021	peptidyl-serine autophosphorylation (GO:0036289)	0.0343391	0.103383	0	0	8.50486	28.6739	DYRK1A;ATM
GO_Biological_Process_2021	peptidyl-tyrosine dephosphorylation involved in inactivation of protein kinase activity (GO:1990264)	0.0343391	0.103383	0	0	8.50486	28.6739	PTPN1;DUSP3
GO_Biological_Process_2021	phosphatidylinositol-3-phosphate biosynthetic process (GO:0036092)	0.0343391	0.103383	0	0	8.50486	28.6739	PIK3CA;PIK3C3
GO_Biological_Process_2021	positive regulation of aspartic-type peptidase activity (GO:1905247)	0.0343391	0.103383	0	0	8.50486	28.6739	LYN;ROCK2
GO_Biological_Process_2021	positive regulation of cysteine-type endopeptidase activity involved in apoptotic signaling pathway (GO:2001269)	0.0343391	0.103383	0	0	8.50486	28.6739	CASP8;JAK2
GO_Biological_Process_2021	positive regulation of execution phase of apoptosis (GO:1900119)	0.0343391	0.103383	0	0	8.50486	28.6739	TP53;BOK
GO_Biological_Process_2021	positive regulation of MHC class II biosynthetic process (GO:0045348)	0.0343391	0.103383	0	0	8.50486	28.6739	AZU1;JAK2
GO_Biological_Process_2021	positive regulation of T-helper 2 cell cytokine production (GO:2000553)	0.0343391	0.103383	0	0	8.50486	28.6739	IL6;NLRP3
GO_Biological_Process_2021	pre-replicative complex assembly involved in nuclear cell cycle DNA replication (GO:0006267)	0.0343391	0.103383	0	0	8.50486	28.6739	MCM7;MCM2
GO_Biological_Process_2021	regulation of acetyl-CoA biosynthetic process from pyruvate (GO:0010510)	0.0343391	0.103383	0	0	8.50486	28.6739	PDP1;PDP2
GO_Biological_Process_2021	regulation of acyl-CoA biosynthetic process (GO:0050812)	0.0343391	0.103383	0	0	8.50486	28.6739	PDP1;PDP2
GO_Biological_Process_2021	regulation of anion transport (GO:0044070)	0.0343391	0.103383	0	0	8.50486	28.6739	ABCB1;RAB11B
GO_Biological_Process_2021	regulation of epithelial to mesenchymal transition involved in endocardial cushion formation (GO:1905005)	0.0343391	0.103383	0	0	8.50486	28.6739	TGFB1;NOG
GO_Biological_Process_2021	regulation of establishment of protein localization to mitochondrion (GO:1903747)	0.0343391	0.103383	0	0	8.50486	28.6739	ATP5IF1;MAPT
GO_Biological_Process_2021	regulation of nitric oxide metabolic process (GO:0080164)	0.0343391	0.103383	0	0	8.50486	28.6739	RAC1;JAK2
GO_Biological_Process_2021	regulation of nitrogen compound metabolic process (GO:0051171)	0.0343391	0.103383	0	0	8.50486	28.6739	ROCK2;TNF
GO_Biological_Process_2021	regulation of response to wounding (GO:1903034)	0.0343391	0.103383	0	0	8.50486	28.6739	IL10;PLAU
GO_Biological_Process_2021	regulation of transcription from RNA polymerase II promoter in response to oxidative stress (GO:0043619)	0.0343391	0.103383	0	0	8.50486	28.6739	HMOX1;HIF1A
GO_Biological_Process_2021	regulation of vascular wound healing (GO:0061043)	0.0343391	0.103383	0	0	8.50486	28.6739	SERPINE1;TNF
GO_Biological_Process_2021	self proteolysis (GO:0097264)	0.0343391	0.103383	0	0	8.50486	28.6739	CASP8;TMPRSS6
GO_Biological_Process_2021	apoptotic mitochondrial changes (GO:0008637)	0.0347634	0.104264	0	0	3.52439	11.8391	BCL2;BAX;BOK;BCL2L1
GO_Biological_Process_2021	negative regulation of JNK cascade (GO:0046329)	0.0347634	0.104264	0	0	3.52439	11.8391	CYLD;DUSP3;TAOK3;NPPA
GO_Biological_Process_2021	regulation of interleukin-17 production (GO:0032660)	0.0347634	0.104264	0	0	3.52439	11.8391	IL6;TGFB1;DDIT3;NR1H4
GO_Biological_Process_2021	regulation of protein localization to cell surface (GO:2000008)	0.0347634	0.104264	0	0	3.52439	11.8391	EGF;CTNNB1;TNF;RAB11B
GO_Biological_Process_2021	regulation of sprouting angiogenesis (GO:1903670)	0.0347634	0.104264	0	0	3.52439	11.8391	PDPK1;RHOJ;JAK1;VEGFA
GO_Biological_Process_2021	positive regulation of protein ubiquitination (GO:0031398)	0.0353926	0.106071	0	0	2.38866	7.98112	FKBP1A;ANGPT1;LRRK2;CUL3;PLK1;PIN1;BRCA1
GO_Biological_Process_2021	defense response to bacterium (GO:0042742)	0.0354971	0.106303	0	0	1.87648	6.26425	FGR;IL6;SYK;NOS2;PLA2G1B;SERPINE1;PRKCD;CTSG;RNASE3;AZU1;CXCL13;ELANE
GO_Biological_Process_2021	cellular response to mechanical stimulus (GO:0071260)	0.0369371	0.110449	0	0	2.90522	9.58298	MAP3K2;CASP8;CHEK1;CASP1;NFKB1
GO_Biological_Process_2021	response to unfolded protein (GO:0006986)	0.0369371	0.110449	0	0	2.90522	9.58298	DNAJB1;PTPN1;DDIT3;HSPB1;BAX
GO_Biological_Process_2021	regulation of Notch signaling pathway (GO:0008593)	0.0374455	0.1118	0	0	2.35711	7.74279	SRC;EGF;NOS3;STAT3;AKT1;GATA2;EGFR
GO_Biological_Process_2021	regulation of osteoblast differentiation (GO:0045667)	0.0374455	0.1118	0	0	2.35711	7.74279	IL6;ATP6AP1;HGF;NOG;TWIST1;PPARG;PRKD1
GO_Biological_Process_2021	cellular response to nitrogen compound (GO:1901699)	0.0379816	0.112385	0	0	4.50598	14.7375	BLM;ROCK2;NR1H4
GO_Biological_Process_2021	embryonic digestive tract development (GO:0048566)	0.0379816	0.112385	0	0	4.50598	14.7375	PDGFRA;CXCL8;TNF
GO_Biological_Process_2021	endoplasmic reticulum calcium ion homeostasis (GO:0032469)	0.0379816	0.112385	0	0	4.50598	14.7375	BCL2;BAX;TGM2
GO_Biological_Process_2021	inositol phosphate-mediated signaling (GO:0048016)	0.0379816	0.112385	0	0	4.50598	14.7375	PPP3CA;PPP3CB;PPP3CC
GO_Biological_Process_2021	lipopolysaccharide-mediated signaling pathway (GO:0031663)	0.0379816	0.112385	0	0	4.50598	14.7375	LYN;TGFB1;TNF
GO_Biological_Process_2021	positive regulation of lymphocyte differentiation (GO:0045621)	0.0379816	0.112385	0	0	4.50598	14.7375	SYK;RHOH;GATA3
GO_Biological_Process_2021	positive regulation of peptidyl-lysine acetylation (GO:2000758)	0.0379816	0.112385	0	0	4.50598	14.7375	PRKAA2;RPS6KA5;BRCA1
GO_Biological_Process_2021	positive regulation of protein processing (GO:0010954)	0.0379816	0.112385	0	0	4.50598	14.7375	F12;HPN;KLKB1
GO_Biological_Process_2021	purine ribonucleoside monophosphate metabolic process (GO:0009167)	0.0379816	0.112385	0	0	4.50598	14.7375	IMPDH1;IMPDH2;GART
GO_Biological_Process_2021	regulation of protein localization to cell periphery (GO:1904375)	0.0379816	0.112385	0	0	4.50598	14.7375	AR;PLK1;INS
GO_Biological_Process_2021	regulation of smooth muscle cell migration (GO:0014910)	0.0379816	0.112385	0	0	4.50598	14.7375	LRP1;PLAU;SERPINE1
GO_Biological_Process_2021	regulation of T cell migration (GO:2000404)	0.0379816	0.112385	0	0	4.50598	14.7375	APP;CCL20;RHOA
GO_Biological_Process_2021	cellular response to nutrient levels (GO:0031669)	0.038223	0.112621	0	0	2.55787	8.34969	RALB;PRKAA2;LRRK2;EHMT2;PPARA;FOXO1
GO_Biological_Process_2021	positive regulation of interleukin-12 production (GO:0032735)	0.0382606	0.112621	0	0	3.40674	11.1173	MAPK11;SYK;HMGB1;MAPK14
GO_Biological_Process_2021	positive regulation of protein dephosphorylation (GO:0035307)	0.0382606	0.112621	0	0	3.40674	11.1173	TGFB1;PRKCD;PIN1;CALM2
GO_Biological_Process_2021	positive regulation of telomerase activity (GO:0051973)	0.0382606	0.112621	0	0	3.40674	11.1173	MAPK1;CTNNB1;MAPKAPK5;MAPK15
GO_Biological_Process_2021	protein localization to chromosome (GO:0034502)	0.0382606	0.112621	0	0	3.40674	11.1173	RB1;MCM9;PLK1;ESR1
GO_Biological_Process_2021	response to steroid hormone (GO:0048545)	0.0382606	0.112621	0	0	3.40674	11.1173	AR;TGFB1;NR3C1;NKX3-1
GO_Biological_Process_2021	sister chromatid segregation (GO:0000819)	0.0382606	0.112621	0	0	3.40674	11.1173	RB1;TOP2A;TOP2B;PLK1
GO_Biological_Process_2021	neuron projection morphogenesis (GO:0048812)	0.0399376	0.117471	0	0	1.97092	6.34723	CDC42;APP;NCKAP1;ROCK1;TAOK3;LRRK2;PTEN;CTNNB1;SGK1;KLK8
GO_Biological_Process_2021	regulation of viral genome replication (GO:0045069)	0.0406971	0.119616	0	0	2.5158	8.05459	CXCL8;APOBEC3G;IFNB1;PPARA;HACD3;TNF
GO_Biological_Process_2021	B cell activation (GO:0042113)	0.0417824	0.122068	0	0	2.29643	7.2918	IL10;CASP8;PTPRC;IFNB1;CEBPG;BCL2;PTPN2
GO_Biological_Process_2021	epithelium development (GO:0060429)	0.0418886	0.122068	0	0	2.03977	6.47166	CBR1;TGFB1;BDH2;PCNA;GATA6;VDAC1;PPARG;JAK2;VEGFA
GO_Biological_Process_2021	blood vessel diameter maintenance (GO:0097746)	0.0419517	0.122068	0	0	3.29667	10.4545	ROCK1;ROCK2;NOS3;INS
GO_Biological_Process_2021	cellular response to amyloid-beta (GO:1904646)	0.0419517	0.122068	0	0	3.29667	10.4545	APP;GSK3B;LRP1;ICAM1
GO_Biological_Process_2021	negative regulation of cell cycle G1/S phase transition (GO:1902807)	0.0419517	0.122068	0	0	3.29667	10.4545	RB1;RBL2;CDK4;PTEN
GO_Biological_Process_2021	regulation of interleukin-12 production (GO:0032655)	0.0428241	0.122068	0	0	2.77861	8.75445	IL10;MAPK11;SYK;HMGB1;MAPK14
GO_Biological_Process_2021	anoikis (GO:0043276)	0.043062	0.122068	0	0	7.2895	22.9263	PIK3CA;AKT1
GO_Biological_Process_2021	astral microtubule organization (GO:0030953)	0.043062	0.122068	0	0	7.2895	22.9263	EZR;RAB11A
GO_Biological_Process_2021	ATF6-mediated unfolded protein response (GO:0036500)	0.043062	0.122068	0	0	7.2895	22.9263	MBTPS1;DDIT3
GO_Biological_Process_2021	bone cell development (GO:0098751)	0.043062	0.122068	0	0	7.2895	22.9263	THPO;SRC
GO_Biological_Process_2021	cellular response to interleukin-9 (GO:0071355)	0.043062	0.122068	0	0	7.2895	22.9263	STAT3;JAK1
GO_Biological_Process_2021	cellular response to nitric oxide (GO:0071732)	0.043062	0.122068	0	0	7.2895	22.9263	CDK2;FOXO1
GO_Biological_Process_2021	cellular response to reactive nitrogen species (GO:1902170)	0.043062	0.122068	0	0	7.2895	22.9263	CDK2;FOXO1
GO_Biological_Process_2021	development of primary female sexual characteristics (GO:0046545)	0.043062	0.122068	0	0	7.2895	22.9263	NR5A1;CYP19A1
GO_Biological_Process_2021	endothelial cell chemotaxis (GO:0035767)	0.043062	0.122068	0	0	7.2895	22.9263	CXCL13;VEGFA
GO_Biological_Process_2021	interleukin-23-mediated signaling pathway (GO:0038155)	0.043062	0.122068	0	0	7.2895	22.9263	STAT3;JAK2
GO_Biological_Process_2021	interleukin-9-mediated signaling pathway (GO:0038113)	0.043062	0.122068	0	0	7.2895	22.9263	STAT3;JAK1
GO_Biological_Process_2021	ketone body biosynthetic process (GO:0046951)	0.043062	0.122068	0	0	7.2895	22.9263	BDH2;HMGCS2
GO_Biological_Process_2021	kynurenine metabolic process (GO:0070189)	0.043062	0.122068	0	0	7.2895	22.9263	KYAT3;KYAT1
GO_Biological_Process_2021	negative regulation of glial cell differentiation (GO:0045686)	0.043062	0.122068	0	0	7.2895	22.9263	NOG;F2
GO_Biological_Process_2021	negative regulation of membrane potential (GO:0045837)	0.043062	0.122068	0	0	7.2895	22.9263	BAX;MAPT
GO_Biological_Process_2021	negative regulation of nitric oxide biosynthetic process (GO:0045019)	0.043062	0.122068	0	0	7.2895	22.9263	ROCK2;GLA
GO_Biological_Process_2021	negative regulation of nitric oxide metabolic process (GO:1904406)	0.043062	0.122068	0	0	7.2895	22.9263	ROCK2;GLA
GO_Biological_Process_2021	negative regulation of production of molecular mediator of immune response (GO:0002701)	0.043062	0.122068	0	0	7.2895	22.9263	IL10;TNF
GO_Biological_Process_2021	phenol-containing compound biosynthetic process (GO:0046189)	0.043062	0.122068	0	0	7.2895	22.9263	DDC;TYR
GO_Biological_Process_2021	phosphatidylglycerol biosynthetic process (GO:0006655)	0.043062	0.122068	0	0	7.2895	22.9263	GPAM;CRLS1
GO_Biological_Process_2021	positive regulation of B cell differentiation (GO:0045579)	0.043062	0.122068	0	0	7.2895	22.9263	IL10;SYK
GO_Biological_Process_2021	positive regulation of fatty acid beta-oxidation (GO:0032000)	0.043062	0.122068	0	0	7.2895	22.9263	TWIST1;PPARA
GO_Biological_Process_2021	positive regulation of mast cell degranulation (GO:0043306)	0.043062	0.122068	0	0	7.2895	22.9263	FGR;SYK
GO_Biological_Process_2021	positive regulation of smooth muscle contraction (GO:0045987)	0.043062	0.122068	0	0	7.2895	22.9263	NMU;SPX
GO_Biological_Process_2021	regulation of aspartic-type endopeptidase activity involved in amyloid precursor protein catabolic process (GO:1902959)	0.043062	0.122068	0	0	7.2895	22.9263	LYN;ROCK2
GO_Biological_Process_2021	regulation of glial cell proliferation (GO:0060251)	0.043062	0.122068	0	0	7.2895	22.9263	IL6;TNF
GO_Biological_Process_2021	regulation of interleukin-23 production (GO:0032667)	0.043062	0.122068	0	0	7.2895	22.9263	CSF2;RAC1
GO_Biological_Process_2021	regulation of leukocyte mediated cytotoxicity (GO:0001910)	0.043062	0.122068	0	0	7.2895	22.9263	NOS2;ICAM1
GO_Biological_Process_2021	regulation of nephron tubule epithelial cell differentiation (GO:0072182)	0.043062	0.122068	0	0	7.2895	22.9263	CTNNB1;GATA3
GO_Biological_Process_2021	regulation of PERK-mediated unfolded protein response (GO:1903897)	0.043062	0.122068	0	0	7.2895	22.9263	PTPN1;BOK
GO_Biological_Process_2021	regulation of pinocytosis (GO:0048548)	0.043062	0.122068	0	0	7.2895	22.9263	CDC42;NR1H2
GO_Biological_Process_2021	regulation of protein deacetylation (GO:0090311)	0.043062	0.122068	0	0	7.2895	22.9263	SPRED1;DYRK1A
GO_Biological_Process_2021	response to leptin (GO:0044321)	0.043062	0.122068	0	0	7.2895	22.9263	CCND1;STAT3
GO_Biological_Process_2021	skeletal muscle fiber development (GO:0048741)	0.043062	0.122068	0	0	7.2895	22.9263	ACTA1;MYORG
GO_Biological_Process_2021	unsaturated fatty acid biosynthetic process (GO:0006636)	0.043062	0.122068	0	0	7.2895	22.9263	ALOX15;DECR2
GO_Biological_Process_2021	beta-catenin destruction complex disassembly (GO:1904886)	0.0431029	0.122068	0	0	4.25542	13.3797	GSK3B;CSNK1A1;CTNNB1
GO_Biological_Process_2021	cellular response to inorganic substance (GO:0071241)	0.0431029	0.122068	0	0	4.25542	13.3797	BLM;CDK2;FOXO1
GO_Biological_Process_2021	endocardial cushion development (GO:0003197)	0.0431029	0.122068	0	0	4.25542	13.3797	NOS3;NOG;GATA4
GO_Biological_Process_2021	innate immune response in mucosa (GO:0002227)	0.0431029	0.122068	0	0	4.25542	13.3797	NOS2;PLA2G1B;RNASE3
GO_Biological_Process_2021	melanosome localization (GO:0032400)	0.0431029	0.122068	0	0	4.25542	13.3797	ARL6;RAB11A;RAB11B
GO_Biological_Process_2021	negative regulation of protein localization to cell periphery (GO:1904376)	0.0431029	0.122068	0	0	4.25542	13.3797	TGFB1;RHOQ;BCL2L1
GO_Biological_Process_2021	neuron apoptotic process (GO:0051402)	0.0431029	0.122068	0	0	4.25542	13.3797	APP;BCL2;NAE1
GO_Biological_Process_2021	positive regulation of antigen receptor-mediated signaling pathway (GO:0050857)	0.0431029	0.122068	0	0	4.25542	13.3797	PTPRC;LCK;RELA
GO_Biological_Process_2021	positive regulation of T cell cytokine production (GO:0002726)	0.0431029	0.122068	0	0	4.25542	13.3797	IL6;NLRP3;TRAF2
GO_Biological_Process_2021	protein localization to chromatin (GO:0071168)	0.0431029	0.122068	0	0	4.25542	13.3797	MCM9;PLK1;ESR1
GO_Biological_Process_2021	positive regulation of protein localization to nucleus (GO:1900182)	0.04327	0.122454	0	0	2.4751	7.77253	TGFB1;PRKCD;PLK1;AKT1;F2;INS
GO_Biological_Process_2021	protein localization to organelle (GO:0033365)	0.0433059	0.122468	0	0	1.94086	6.09325	YWHAE;APP;ARL6;LRRK2;SEC61G;LMNA;ARL1;HMOX1;EMD;RAB11A
GO_Biological_Process_2021	regulation of neuron death (GO:1901214)	0.044068	0.124535	0	0	2.26724	7.07838	GSK3B;LRRK2;AKT1;RRAS2;TRAF2;MAPT;NAE1
GO_Biological_Process_2021	negative regulation of DNA-binding transcription factor activity (GO:0043433)	0.0450604	0.127158	0	0	1.92616	5.97063	RB1;NFKBIA;CYLD;DDIT3;CEBPG;PIM1;KEAP1;CYP1B1;NLRP3;ESR1
GO_Biological_Process_2021	neuron development (GO:0048666)	0.0450604	0.127158	0	0	1.92616	5.97063	RB1;LYN;APP;GSK3B;IL6;ROCK1;STMN4;HMGB1;MAPT;RAB11A
GO_Biological_Process_2021	cellular response to heat (GO:0034605)	0.0458368	0.12889	0	0	3.19348	9.84445	YWHAE;HMOX1;TRPV1;MAPT
GO_Biological_Process_2021	negative regulation of cellular protein localization (GO:1903828)	0.0458368	0.12889	0	0	3.19348	9.84445	GSK3B;ROCK2;ADIPOQ;MAPT
GO_Biological_Process_2021	negative regulation of DNA metabolic process (GO:0051053)	0.0458368	0.12889	0	0	3.19348	9.84445	BLM;KMT2A;ERCC1;ADIPOQ
GO_Biological_Process_2021	positive regulation of mitotic nuclear division (GO:0045840)	0.0458368	0.12889	0	0	3.19348	9.84445	RB1;EGF;CUL3;INS
GO_Biological_Process_2021	positive regulation of substrate adhesion-dependent cell spreading (GO:1900026)	0.0458368	0.12889	0	0	3.19348	9.84445	CDC42;ILK;RAC3;RAC1
GO_Biological_Process_2021	positive regulation of protein polymerization (GO:0032273)	0.0459427	0.12889	0	0	2.43568	7.50278	NCKAP1;ALOX15;RAC1;MAPT;MAPRE1;MET
GO_Biological_Process_2021	plasma membrane bounded cell projection morphogenesis (GO:0120039)	0.0459671	0.12889	0	0	2.71935	8.37514	NCKAP1;TAOK3;LRRK2;SGK1;KLK8
GO_Biological_Process_2021	protein homotetramerization (GO:0051289)	0.0459671	0.12889	0	0	2.71935	8.37514	TRPV1;ACACB;HSD17B10;CBR4;CRYZ
GO_Biological_Process_2021	signal transduction in response to DNA damage (GO:0042770)	0.0459671	0.12889	0	0	2.71935	8.37514	CHEK1;ATM;MAPK14;TP53;BATF
GO_Biological_Process_2021	cellular response to nerve growth factor stimulus (GO:1990090)	0.0485501	0.135081	0	0	4.03124	12.1952	RAP1A;AKT1;MAPT
GO_Biological_Process_2021	error-free translesion synthesis (GO:0070987)	0.0485501	0.135081	0	0	4.03124	12.1952	PCNA;REV1;POLH
GO_Biological_Process_2021	female gonad development (GO:0008585)	0.0485501	0.135081	0	0	4.03124	12.1952	NR5A1;CYP19A1;VEGFA
GO_Biological_Process_2021	negative regulation of B cell activation (GO:0050869)	0.0485501	0.135081	0	0	4.03124	12.1952	LYN;IL10;ATM
GO_Biological_Process_2021	positive regulation of axon extension (GO:0045773)	0.0485501	0.135081	0	0	4.03124	12.1952	MACF1;MAPT;VEGFA
GO_Biological_Process_2021	positive regulation of DNA-templated transcription, initiation (GO:2000144)	0.0485501	0.135081	0	0	4.03124	12.1952	JUN;TWIST1;MITF
GO_Biological_Process_2021	positive regulation of granulocyte chemotaxis (GO:0071624)	0.0485501	0.135081	0	0	4.03124	12.1952	CXCL8;RAC2;RAC1
GO_Biological_Process_2021	positive regulation of lipid catabolic process (GO:0050996)	0.0485501	0.135081	0	0	4.03124	12.1952	PRKCD;TWIST1;PPARA
GO_Biological_Process_2021	positive regulation of neutrophil migration (GO:1902624)	0.0485501	0.135081	0	0	4.03124	12.1952	CXCL8;RAC2;RAC1
GO_Biological_Process_2021	regulation of execution phase of apoptosis (GO:1900117)	0.0485501	0.135081	0	0	4.03124	12.1952	TP53;BCL2L1;BOK
GO_Biological_Process_2021	regulation of membrane protein ectodomain proteolysis (GO:0051043)	0.0485501	0.135081	0	0	4.03124	12.1952	IL10;ROCK1;TNF
GO_Biological_Process_2021	cellular response to light stimulus (GO:0071482)	0.0487158	0.135238	0	0	2.3975	7.24465	PCNA;PARP1;PRKCD;POLK;TP53;MAPK13
GO_Biological_Process_2021	neutrophil chemotaxis (GO:0030593)	0.0487158	0.135238	0	0	2.3975	7.24465	CXCL8;SYK;PLA2G1B;CCL20;CXCL13;CXCL2
GO_Biological_Process_2021	regulation of plasma membrane bounded cell projection assembly (GO:0120032)	0.0487158	0.135238	0	0	2.3975	7.24465	CDC42;CYLD;TBC1D2;TBC1D2B;RAC1;MAPK15
GO_Biological_Process_2021	antigen receptor-mediated signaling pathway (GO:0050851)	0.0487773	0.135238	0	0	1.77802	5.37048	PTPRC;SYK;PIK3CA;PDPK1;LCK;BCL2;CSK;GATA3;EIF2B1;SKAP1;NFKB1;RELA
GO_Biological_Process_2021	endoplasmic reticulum to Golgi vesicle-mediated transport (GO:0006888)	0.0487773	0.135238	0	0	1.77802	5.37048	RAB2A;ARF4;F7;F8;PROC;F9;F10;CUL3;PROZ;F2;F5;INS
GO_Biological_Process_2021	regulation of neuron projection development (GO:0010975)	0.0490177	0.13581	0	0	1.8303	5.5194	LYN;GSK3B;MAG;BAG5;RAP1A;RIT2;LRRK2;PTEN;AKT1;PRKD1;RTN4IP1
GO_Biological_Process_2021	positive regulation of phagocytosis (GO:0050766)	0.0492438	0.136341	0	0	2.66256	8.01689	PTPRC;AZU1;GATA2;TNF;C2
GO_Biological_Process_2021	negative regulation of G1/S transition of mitotic cell cycle (GO:2000134)	0.0499155	0.137624	0	0	3.09655	9.28168	RB1;RBL2;CDK4;PTEN
GO_Biological_Process_2021	nucleotide-excision repair, DNA incision, 5'-to lesion (GO:0006296)	0.0499155	0.137624	0	0	3.09655	9.28168	PCNA;PARP1;ERCC1;POLK
GO_Biological_Process_2021	positive regulation of cytokinesis (GO:0032467)	0.0499155	0.137624	0	0	3.09655	9.28168	CDC42;CUL3;RHOA;CDC25B
GO_Biological_Process_2021	protein insertion into ER membrane (GO:0045048)	0.0499155	0.137624	0	0	3.09655	9.28168	APP;SEC61G;HMOX1;EMD
GO_Biological_Process_2021	regulation of p38MAPK cascade (GO:1900744)	0.0499155	0.137624	0	0	3.09655	9.28168	CYLD;PHLPP1;EZR;VEGFA
GO_Biological_Process_2021	regulation of transport (GO:0051049)	0.0499155	0.137624	0	0	3.09655	9.28168	MBTPS1;RAB25;LRRK2;RAB11A
GO_Biological_Process_2021	transforming growth factor beta receptor signaling pathway (GO:0007179)	0.0514011	0.140179	0	0	2.18395	6.48218	FKBP1A;TWSG1;JUN;TGFB1;HPGD;SRC;RHOA
GO_Biological_Process_2021	regulation of TOR signaling (GO:0032006)	0.0515897	0.140179	0	0	2.36049	6.99752	PRKAA2;MIOS;PIK3CA;RHEB;NPRL3;MAPKAPK5
GO_Biological_Process_2021	arginine metabolic process (GO:0006525)	0.0525052	0.140179	0	0	6.37798	18.7949	NOS2;NOS3
GO_Biological_Process_2021	cellular response to acidic pH (GO:0071468)	0.0525052	0.140179	0	0	6.37798	18.7949	TRPV1;RAB11B
GO_Biological_Process_2021	complement activation, lectin pathway (GO:0001867)	0.0525052	0.140179	0	0	6.37798	18.7949	MASP2;MASP1
GO_Biological_Process_2021	ether lipid biosynthetic process (GO:0008611)	0.0525052	0.140179	0	0	6.37798	18.7949	DHRS7B;AGPS
GO_Biological_Process_2021	glycosphingolipid catabolic process (GO:0046479)	0.0525052	0.140179	0	0	6.37798	18.7949	NEU2;GLA
GO_Biological_Process_2021	granulocyte activation (GO:0036230)	0.0525052	0.140179	0	0	6.37798	18.7949	CXCL8;PRKCD
GO_Biological_Process_2021	hematopoietic stem cell differentiation (GO:0060218)	0.0525052	0.140179	0	0	6.37798	18.7949	TP53;BATF
GO_Biological_Process_2021	lipoprotein transport (GO:0042953)	0.0525052	0.140179	0	0	6.37798	18.7949	LRP1;PPARG
GO_Biological_Process_2021	long-chain fatty acid import into cell (GO:0044539)	0.0525052	0.140179	0	0	6.37798	18.7949	RPS6KB1;SPX
GO_Biological_Process_2021	membrane lipid catabolic process (GO:0046466)	0.0525052	0.140179	0	0	6.37798	18.7949	SGPL1;CYP1B1
GO_Biological_Process_2021	mitotic DNA replication (GO:1902969)	0.0525052	0.140179	0	0	6.37798	18.7949	CDC45;MCM2
GO_Biological_Process_2021	muscle cell migration (GO:0014812)	0.0525052	0.140179	0	0	6.37798	18.7949	ROCK1;PLAT
GO_Biological_Process_2021	myelin maintenance (GO:0043217)	0.0525052	0.140179	0	0	6.37798	18.7949	PTEN;CXCR4
GO_Biological_Process_2021	negative regulation of cell adhesion mediated by integrin (GO:0033629)	0.0525052	0.140179	0	0	6.37798	18.7949	SERPINE1;CYP1B1
GO_Biological_Process_2021	negative regulation of establishment of protein localization (GO:1904950)	0.0525052	0.140179	0	0	6.37798	18.7949	MAPT;PPM1F
GO_Biological_Process_2021	negative regulation of heterotypic cell-cell adhesion (GO:0034115)	0.0525052	0.140179	0	0	6.37798	18.7949	IL10;ADIPOQ
GO_Biological_Process_2021	negative regulation of peptidyl-lysine acetylation (GO:2000757)	0.0525052	0.140179	0	0	6.37798	18.7949	SDR16C5;BRCA1
GO_Biological_Process_2021	negative regulation of phosphatidylinositol 3-kinase signaling (GO:0014067)	0.0525052	0.140179	0	0	6.37798	18.7949	PTEN;TWIST1
GO_Biological_Process_2021	negative regulation of telomerase activity (GO:0051974)	0.0525052	0.140179	0	0	6.37798	18.7949	SRC;TP53
GO_Biological_Process_2021	negative regulation of transcription from RNA polymerase II promoter in response to stress (GO:0097201)	0.0525052	0.140179	0	0	6.37798	18.7949	DNAJB1;JUN
GO_Biological_Process_2021	negative regulation of transforming growth factor beta production (GO:0071635)	0.0525052	0.140179	0	0	6.37798	18.7949	FN1;GATA6
GO_Biological_Process_2021	negative regulation of tyrosine phosphorylation of STAT protein (GO:0042532)	0.0525052	0.140179	0	0	6.37798	18.7949	PPP2CA;PTPN2
GO_Biological_Process_2021	neuron projection maintenance (GO:1990535)	0.0525052	0.140179	0	0	6.37798	18.7949	APP;INS
GO_Biological_Process_2021	neuron remodeling (GO:0016322)	0.0525052	0.140179	0	0	6.37798	18.7949	APP;RND1
GO_Biological_Process_2021	nucleic acid transport (GO:0050657)	0.0525052	0.140179	0	0	6.37798	18.7949	SIDT1;SIDT2
GO_Biological_Process_2021	positive regulation by symbiont of entry into host (GO:0075294)	0.0525052	0.140179	0	0	6.37798	18.7949	TMPRSS4;TMPRSS2
GO_Biological_Process_2021	positive regulation of keratinocyte migration (GO:0051549)	0.0525052	0.140179	0	0	6.37798	18.7949	MMP9;MAPRE2
GO_Biological_Process_2021	positive regulation of lipase activity (GO:0060193)	0.0525052	0.140179	0	0	6.37798	18.7949	PDPK1;RHOA
GO_Biological_Process_2021	positive regulation of protein sumoylation (GO:0033235)	0.0525052	0.140179	0	0	6.37798	18.7949	RASD2;SAE1
GO_Biological_Process_2021	positive regulation of tissue remodeling (GO:0034105)	0.0525052	0.140179	0	0	6.37798	18.7949	ROCK1;ROCK2
GO_Biological_Process_2021	positive regulation of vasculogenesis (GO:2001214)	0.0525052	0.140179	0	0	6.37798	18.7949	RAP1A;RRAS
GO_Biological_Process_2021	positive regulation of viral entry into host cell (GO:0046598)	0.0525052	0.140179	0	0	6.37798	18.7949	TMPRSS4;TMPRSS2
GO_Biological_Process_2021	protein deneddylation (GO:0000338)	0.0525052	0.140179	0	0	6.37798	18.7949	COPS5;COPS8
GO_Biological_Process_2021	regulation of cell activation (GO:0050865)	0.0525052	0.140179	0	0	6.37798	18.7949	IL6;SYK
GO_Biological_Process_2021	regulation of cell-cell adhesion involved in gastrulation (GO:0070587)	0.0525052	0.140179	0	0	6.37798	18.7949	IL10;ADIPOQ
GO_Biological_Process_2021	regulation of cell-cell adhesion mediated by integrin (GO:0033632)	0.0525052	0.140179	0	0	6.37798	18.7949	CXCL13;SKAP1
GO_Biological_Process_2021	regulation of DNA methylation (GO:0044030)	0.0525052	0.140179	0	0	6.37798	18.7949	KMT2A;MPHOSPH8
GO_Biological_Process_2021	regulation of endoplasmic reticulum unfolded protein response (GO:1900101)	0.0525052	0.140179	0	0	6.37798	18.7949	COPS5;BAX
GO_Biological_Process_2021	regulation of epithelial cell apoptotic process (GO:1904035)	0.0525052	0.140179	0	0	6.37798	18.7949	TNF;BOK
GO_Biological_Process_2021	regulation of histone phosphorylation (GO:0033127)	0.0525052	0.140179	0	0	6.37798	18.7949	RPS6KA5;TWIST1
GO_Biological_Process_2021	regulation of hydrogen peroxide-induced cell death (GO:1903205)	0.0525052	0.140179	0	0	6.37798	18.7949	LRRK2;NFE2L2
GO_Biological_Process_2021	regulation of macrophage migration (GO:1905521)	0.0525052	0.140179	0	0	6.37798	18.7949	P2RY12;MST1
GO_Biological_Process_2021	regulation of podosome assembly (GO:0071801)	0.0525052	0.140179	0	0	6.37798	18.7949	CSF2;TNF
GO_Biological_Process_2021	retinoic acid receptor signaling pathway (GO:0048384)	0.0525052	0.140179	0	0	6.37798	18.7949	RXRA;PPARG
GO_Biological_Process_2021	sulfur amino acid catabolic process (GO:0000098)	0.0525052	0.140179	0	0	6.37798	18.7949	MTRR;GADL1
GO_Biological_Process_2021	regulation of cellular macromolecule biosynthetic process (GO:2000112)	0.0529203	0.141192	0	0	1.45144	4.26574	RB1;APP;EHMT2;NR1I2;GMNN;GATA4;AHR;NR3C1;HIF1A;GATA1;RELA;INS;PPP2CA;RPS6KA5;NKX3-1;STAT3;RHOH;MITF;ESR1;ESR2;PTP4A3;SP1;DDIT3;MAPKAPK5;TP53
GO_Biological_Process_2021	negative regulation of TOR signaling (GO:0032007)	0.0541868	0.143467	0	0	3.00532	8.76146	PRKAA2;NPRL3;MAPKAPK5;ATM
GO_Biological_Process_2021	regulation of axon extension (GO:0030516)	0.0541868	0.143467	0	0	3.00532	8.76146	MACF1;GSK3B;MAG;MAPT
GO_Biological_Process_2021	regulation of phosphoprotein phosphatase activity (GO:0043666)	0.0541868	0.143467	0	0	3.00532	8.76146	FKBP1A;GSK3B;FKBP1B;CALM2
GO_Biological_Process_2021	response to cAMP (GO:0051591)	0.0541868	0.143467	0	0	3.00532	8.76146	RAP1B;RAP1A;AHR;EZR
GO_Biological_Process_2021	DNA methylation (GO:0006306)	0.054316	0.143467	0	0	3.82948	11.155	MTRR;EHMT2;PPM1D
GO_Biological_Process_2021	ERK1 and ERK2 cascade (GO:0070371)	0.054316	0.143467	0	0	3.82948	11.155	MAP2K1;EGF;MAPK1
GO_Biological_Process_2021	negative regulation of G protein-coupled receptor signaling pathway (GO:0045744)	0.054316	0.143467	0	0	3.82948	11.155	CXCL8;KLK14;MET
GO_Biological_Process_2021	negative regulation of reactive oxygen species metabolic process (GO:2000378)	0.054316	0.143467	0	0	3.82948	11.155	BRCA1;PPARA;INS
GO_Biological_Process_2021	nucleotide-excision repair, DNA damage recognition (GO:0000715)	0.054316	0.143467	0	0	3.82948	11.155	COPS5;PARP1;COPS8
GO_Biological_Process_2021	positive regulation of interleukin-17 production (GO:0032740)	0.054316	0.143467	0	0	3.82948	11.155	IL6;TGFB1;NR1H4
GO_Biological_Process_2021	positive regulation of JUN kinase activity (GO:0043507)	0.054316	0.143467	0	0	3.82948	11.155	TAOK3;TRAF2;TNF
GO_Biological_Process_2021	positive regulation of morphogenesis of an epithelium (GO:1905332)	0.054316	0.143467	0	0	3.82948	11.155	EGF;NOG;VEGFA
GO_Biological_Process_2021	regulation of mononuclear cell migration (GO:0071675)	0.054316	0.143467	0	0	3.82948	11.155	LYN;MAPK1;TNF
GO_Biological_Process_2021	regulation of peptidase activity (GO:0052547)	0.054316	0.143467	0	0	3.82948	11.155	HDAC1;PRSS22;MAPK12
GO_Biological_Process_2021	regulation of release of sequestered calcium ion into cytosol by sarcoplasmic reticulum (GO:0010880)	0.054316	0.143467	0	0	3.82948	11.155	FKBP1B;DHRS7C;CALM2
GO_Biological_Process_2021	cell morphogenesis involved in differentiation (GO:0000904)	0.0545651	0.143933	0	0	2.32461	6.76079	RB1;RAB25;FN1;ILK;RAC1;RHOA
GO_Biological_Process_2021	negative regulation of epithelial cell proliferation (GO:0050680)	0.0545651	0.143933	0	0	2.32461	6.76079	ATP5IF1;TGFB1;VDR;HPN;GATA3;NKX3-1
GO_Biological_Process_2021	DNA-dependent DNA replication (GO:0006261)	0.0560914	0.14786	0	0	1.92008	5.53131	POLB;BLM;CDC45;RAD51;MCM7;GMNN;CDK2;RECQL;MCM2
GO_Biological_Process_2021	ceramide metabolic process (GO:0006672)	0.0561995	0.147949	0	0	2.55579	7.35774	PPP2CA;SGPL1;PLPP3;PLPP2;PLPP1
GO_Biological_Process_2021	glycoprotein metabolic process (GO:0009100)	0.0561995	0.147949	0	0	2.55579	7.35774	NEU2;GANAB;ST8SIA1;HIF1A;GANC
GO_Biological_Process_2021	regulation of stem cell differentiation (GO:2000736)	0.0566922	0.149147	0	0	2.13173	6.11832	PDGFRA;NUDT21;CBFB;KMT2A;GATA3;GATA2;GATA1
GO_Biological_Process_2021	endoplasmic reticulum organization (GO:0007029)	0.0576421	0.151344	0	0	2.28979	6.53392	APP;LRRK2;SEC61G;HMOX1;EMD;MAPK15
GO_Biological_Process_2021	granulocyte chemotaxis (GO:0071621)	0.0576421	0.151344	0	0	2.28979	6.53392	CXCL8;SYK;PLA2G1B;CCL20;CXCL13;CXCL2
GO_Biological_Process_2021	transcription-coupled nucleotide-excision repair (GO:0006283)	0.0576421	0.151344	0	0	2.28979	6.53392	PCNA;COPS5;ERCC1;XRCC1;POLK;COPS8
GO_Biological_Process_2021	negative regulation of cellular metabolic process (GO:0031324)	0.0586496	0.153582	0	0	2.9193	8.27965	BRCA1;UGT1A8;NFKB1;INS
GO_Biological_Process_2021	negative regulation of protein secretion (GO:0050709)	0.0586496	0.153582	0	0	2.9193	8.27965	CYP51A1;SIRT4;HMGCR;INS
GO_Biological_Process_2021	nucleotide-excision repair, DNA incision (GO:0033683)	0.0586496	0.153582	0	0	2.9193	8.27965	PCNA;PARP1;ERCC1;POLK
GO_Biological_Process_2021	response to peptide (GO:1901652)	0.0586496	0.153582	0	0	2.9193	8.27965	MMP2;STAT3;EIF2B1;MMP9
GO_Biological_Process_2021	blood vessel morphogenesis (GO:0048514)	0.0598785	0.15649	0	0	2.50555	7.05421	TGFB1;SYK;LAMA1;CYP1B1;VEGFA
GO_Biological_Process_2021	chemokine-mediated signaling pathway (GO:0070098)	0.0598785	0.15649	0	0	2.50555	7.05421	CXCL8;THPO;CCL20;CXCL13;CXCL2
GO_Biological_Process_2021	DNA damage response, signal transduction by p53 class mediator resulting in cell cycle arrest (GO:0006977)	0.0598785	0.15649	0	0	2.50555	7.05421	RBL2;PCNA;BAX;ATM;TP53
GO_Biological_Process_2021	apoptotic nuclear changes (GO:0030262)	0.0603931	0.157109	0	0	3.64694	10.2365	TOP2A;CASP3;HMGB1
GO_Biological_Process_2021	cellular response to catecholamine stimulus (GO:0071870)	0.0603931	0.157109	0	0	3.64694	10.2365	LRRK2;MAPK1;TGM2
GO_Biological_Process_2021	leukotriene metabolic process (GO:0006691)	0.0603931	0.157109	0	0	3.64694	10.2365	PLA2G1B;ALOX15;MAPKAPK2
GO_Biological_Process_2021	nucleotide-binding domain, leucine rich repeat containing receptor signaling pathway (GO:0035872)	0.0603931	0.157109	0	0	3.64694	10.2365	CYLD;CASP8;TAB1
GO_Biological_Process_2021	purine nucleotide metabolic process (GO:0006163)	0.0603931	0.157109	0	0	3.64694	10.2365	NT5E;GPX1;GART
GO_Biological_Process_2021	regulation of keratinocyte proliferation (GO:0010837)	0.0603931	0.157109	0	0	3.64694	10.2365	TGM1;VDR;PRKD1
GO_Biological_Process_2021	response to gamma radiation (GO:0010332)	0.0603931	0.157109	0	0	3.64694	10.2365	ATM;HRAS;TP53
GO_Biological_Process_2021	cellular response to metal ion (GO:0071248)	0.0606586	0.157696	0	0	1.88841	5.29225	MAPK9;JUN;PRKAA2;LRRK2;ALOX15;AKT1;MAPK1;MMP9;EGFR
GO_Biological_Process_2021	DNA damage response, signal transduction by p53 class mediator (GO:0030330)	0.0608211	0.158015	0	0	2.256	6.31639	RBL2;PCNA;BAX;ATM;TP53;BATF
GO_Biological_Process_2021	phosphatidylinositol metabolic process (GO:0046488)	0.0620078	0.158891	0	0	1.96833	5.47292	ARF3;ARF1;PIK3CA;RAB14;PLA2G1B;PTEN;PIK3C3;CDIPT
GO_Biological_Process_2021	angiogenesis involved in wound healing (GO:0060055)	0.0626019	0.158891	0	0	5.66902	15.7086	GATA2;VEGFA
GO_Biological_Process_2021	axonal transport of mitochondrion (GO:0019896)	0.0626019	0.158891	0	0	5.66902	15.7086	MAPT;HIF1A
GO_Biological_Process_2021	cardiac muscle cell membrane repolarization (GO:0099622)	0.0626019	0.158891	0	0	5.66902	15.7086	YWHAE;KCNH2
GO_Biological_Process_2021	cellular glucan metabolic process (GO:0006073)	0.0626019	0.158891	0	0	5.66902	15.7086	GSK3B;PRKAG2
GO_Biological_Process_2021	cellular response to increased oxygen levels (GO:0036295)	0.0626019	0.158891	0	0	5.66902	15.7086	ATP6AP1;FOXO1
GO_Biological_Process_2021	cellular response to interleukin-2 (GO:0071352)	0.0626019	0.158891	0	0	5.66902	15.7086	SYK;JAK1
GO_Biological_Process_2021	cellular response to UV-A (GO:0071492)	0.0626019	0.158891	0	0	5.66902	15.7086	MMP2;MMP9
GO_Biological_Process_2021	establishment of endothelial intestinal barrier (GO:0090557)	0.0626019	0.158891	0	0	5.66902	15.7086	RAP2C;RAP2B
GO_Biological_Process_2021	fatty acid homeostasis (GO:0055089)	0.0626019	0.158891	0	0	5.66902	15.7086	PRKAA2;INS
GO_Biological_Process_2021	formation of extrachromosomal circular DNA (GO:0001325)	0.0626019	0.158891	0	0	5.66902	15.7086	BLM;ERCC1
GO_Biological_Process_2021	interleukin-2-mediated signaling pathway (GO:0038110)	0.0626019	0.158891	0	0	5.66902	15.7086	SYK;JAK1
GO_Biological_Process_2021	ketone body metabolic process (GO:1902224)	0.0626019	0.158891	0	0	5.66902	15.7086	BDH2;HMGCS2
GO_Biological_Process_2021	lipoprotein localization (GO:0044872)	0.0626019	0.158891	0	0	5.66902	15.7086	LRP1;PPARG
GO_Biological_Process_2021	monocyte differentiation (GO:0030224)	0.0626019	0.158891	0	0	5.66902	15.7086	PPARG;VEGFA
GO_Biological_Process_2021	myotube cell development (GO:0014904)	0.0626019	0.158891	0	0	5.66902	15.7086	ACTA1;MYORG
GO_Biological_Process_2021	negative regulation of centrosome duplication (GO:0010826)	0.0626019	0.158891	0	0	5.66902	15.7086	KAT2A;BRCA1
GO_Biological_Process_2021	negative regulation of oxidative stress-induced neuron death (GO:1903204)	0.0626019	0.158891	0	0	5.66902	15.7086	IL10;HIF1A
GO_Biological_Process_2021	nuclear DNA replication (GO:0033260)	0.0626019	0.158891	0	0	5.66902	15.7086	MCM7;MCM2
GO_Biological_Process_2021	positive regulation of ceramide biosynthetic process (GO:2000304)	0.0626019	0.158891	0	0	5.66902	15.7086	PRKCD;TNF
GO_Biological_Process_2021	positive regulation of lipid localization (GO:1905954)	0.0626019	0.158891	0	0	5.66902	15.7086	LRP1;NFKB1
GO_Biological_Process_2021	positive regulation of neuroblast proliferation (GO:0002052)	0.0626019	0.158891	0	0	5.66902	15.7086	CTNNB1;VEGFA
GO_Biological_Process_2021	positive regulation of nitric-oxide synthase biosynthetic process (GO:0051770)	0.0626019	0.158891	0	0	5.66902	15.7086	NAMPT;JAK2
GO_Biological_Process_2021	positive regulation of sphingolipid biosynthetic process (GO:0090154)	0.0626019	0.158891	0	0	5.66902	15.7086	PRKCD;TNF
GO_Biological_Process_2021	positive regulation of transcription elongation from RNA polymerase II promoter (GO:0032968)	0.0626019	0.158891	0	0	5.66902	15.7086	SUPT16H;CDK13
GO_Biological_Process_2021	positive regulation of transcription from RNA polymerase II promoter in response to endoplasmic reticulum stress (GO:1990440)	0.0626019	0.158891	0	0	5.66902	15.7086	DDIT3;TP53
GO_Biological_Process_2021	positive regulation of transforming growth factor beta production (GO:0071636)	0.0626019	0.158891	0	0	5.66902	15.7086	GATA6;PTGS2
GO_Biological_Process_2021	protein kinase C signaling (GO:0070528)	0.0626019	0.158891	0	0	5.66902	15.7086	AZU1;PRSS33
GO_Biological_Process_2021	protein kinase C-activating G protein-coupled receptor signaling pathway (GO:0007205)	0.0626019	0.158891	0	0	5.66902	15.7086	AZU1;PLPP1
GO_Biological_Process_2021	regulation of coagulation (GO:0050818)	0.0626019	0.158891	0	0	5.66902	15.7086	PROC;F2
GO_Biological_Process_2021	regulation of inclusion body assembly (GO:0090083)	0.0626019	0.158891	0	0	5.66902	15.7086	DNAJB1;BAG5
GO_Biological_Process_2021	regulation of mast cell activation involved in immune response (GO:0033006)	0.0626019	0.158891	0	0	5.66902	15.7086	LYN;STXBP2
GO_Biological_Process_2021	regulation of phospholipase activity (GO:0010517)	0.0626019	0.158891	0	0	5.66902	15.7086	LRP1;PDPK1
GO_Biological_Process_2021	t-circle formation (GO:0090656)	0.0626019	0.158891	0	0	5.66902	15.7086	BLM;ERCC1
GO_Biological_Process_2021	telomere maintenance via recombination (GO:0000722)	0.0626019	0.158891	0	0	5.66902	15.7086	RAD51;ERCC1
GO_Biological_Process_2021	telomere maintenance via telomere trimming (GO:0090737)	0.0626019	0.158891	0	0	5.66902	15.7086	BLM;ERCC1
GO_Biological_Process_2021	response to organonitrogen compound (GO:0010243)	0.0633021	0.160565	0	0	2.83806	7.83259	DHFR;IL6;NR1H4;TRPV1
GO_Biological_Process_2021	positive regulation of GTPase activity (GO:0043547)	0.0633783	0.160656	0	0	1.65765	4.57286	GSK3B;CCL20;RHOG;TBC1D2B;CXCL13;TBC1D2;RAP1A;ERBB2;PIN1;PRTN3;HRAS;MAPRE2;TGM2
GO_Biological_Process_2021	regulation of mitotic nuclear division (GO:0007088)	0.0636914	0.161346	0	0	2.45724	6.76651	EGF;CHEK1;PIN1;CDK13;INS
GO_Biological_Process_2021	positive regulation of immune response (GO:0050778)	0.0641021	0.162283	0	0	2.22319	6.10772	IL10;PTPRC;PLA2G1B;IFNB1;NLRP3;SKAP1
GO_Biological_Process_2021	cardiac conduction system development (GO:0003161)	0.0667728	0.167439	0	0	3.48099	9.42115	NPPA;GATA6;GATA4
GO_Biological_Process_2021	chemical synaptic transmission, postsynaptic (GO:0099565)	0.0667728	0.167439	0	0	3.48099	9.42115	GSK3B;LRRK2;AKT1
GO_Biological_Process_2021	energy derivation by oxidation of organic compounds (GO:0015980)	0.0667728	0.167439	0	0	3.48099	9.42115	CYCS;COQ10B;COQ10A
GO_Biological_Process_2021	negative regulation of antigen receptor-mediated signaling pathway (GO:0050858)	0.0667728	0.167439	0	0	3.48099	9.42115	DUSP3;EZR;PTPN2
GO_Biological_Process_2021	negative regulation of endocytosis (GO:0045806)	0.0667728	0.167439	0	0	3.48099	9.42115	NR1H2;RAC1;PRKD1
GO_Biological_Process_2021	negative regulation of response to endoplasmic reticulum stress (GO:1903573)	0.0667728	0.167439	0	0	3.48099	9.42115	LRRK2;NR1H2;BCL2L1
GO_Biological_Process_2021	negative regulation of sequestering of calcium ion (GO:0051283)	0.0667728	0.167439	0	0	3.48099	9.42115	PTPRC;LCK;ITPR1
GO_Biological_Process_2021	phosphatidylglycerol metabolic process (GO:0046471)	0.0667728	0.167439	0	0	3.48099	9.42115	GPAM;PLA2G1B;CRLS1
GO_Biological_Process_2021	positive regulation of release of cytochrome c from mitochondria (GO:0090200)	0.0667728	0.167439	0	0	3.48099	9.42115	BAX;MMP9;TP53
GO_Biological_Process_2021	receptor signaling pathway via STAT (GO:0097696)	0.0667728	0.167439	0	0	3.48099	9.42115	THPO;STAT3;JAK2
GO_Biological_Process_2021	regulation of calcium ion import (GO:0090279)	0.0667728	0.167439	0	0	3.48099	9.42115	PLPP4;EGF;CTNNB1
GO_Biological_Process_2021	regulation of mitochondrial fission (GO:0090140)	0.0667728	0.167439	0	0	3.48099	9.42115	RALA;LRRK2;MAPT
GO_Biological_Process_2021	regulation of neutrophil chemotaxis (GO:0090022)	0.0667728	0.167439	0	0	3.48099	9.42115	CXCL8;RAC2;RAC1
GO_Biological_Process_2021	regulation of ryanodine-sensitive calcium-release channel activity (GO:0060314)	0.0667728	0.167439	0	0	3.48099	9.42115	FKBP1A;FKBP1B;CALM2
GO_Biological_Process_2021	response to hexose (GO:0009746)	0.0667728	0.167439	0	0	3.48099	9.42115	GYS2;ADIPOQ;EIF2B1
GO_Biological_Process_2021	cellular response to transforming growth factor beta stimulus (GO:0071560)	0.0673356	0.168637	0	0	1.93099	5.20993	FKBP1A;TWSG1;JUN;TGFB1;HPGD;SRC;NR3C1;RHOA
GO_Biological_Process_2021	histone modification (GO:0016570)	0.0673356	0.168637	0	0	1.93099	5.20993	MORF4L1;KDM4A;KAT2A;RPS6KA5;HDAC1;EHMT2;PRKCD;CDK2
GO_Biological_Process_2021	actomyosin structure organization (GO:0031032)	0.0674852	0.168905	0	0	2.19131	5.90745	KRT19;ROCK1;ROCK2;SRC;CUL3;RHOA
GO_Biological_Process_2021	receptor metabolic process (GO:0043112)	0.0676375	0.169179	0	0	2.41075	6.49357	CXCL8;TGFB1;SYK;LRP1;RAB11B
GO_Biological_Process_2021	hexose metabolic process (GO:0019318)	0.0681423	0.17012	0	0	2.76121	7.41705	SLC35A2;ADIPOQ;AKR1A1;PPARD
GO_Biological_Process_2021	regulation of filopodium assembly (GO:0051489)	0.0681423	0.17012	0	0	2.76121	7.41705	CDC42;RALA;PRKCD;RHOQ
GO_Biological_Process_2021	regulation of protein dephosphorylation (GO:0035304)	0.0681423	0.17012	0	0	2.76121	7.41705	TGFB1;PRKCD;PIN1;CALM2
GO_Biological_Process_2021	mitochondrion organization (GO:0007005)	0.0687306	0.17148	0	0	1.71779	4.5995	PARP1;FMC1;NOS3;LRRK2;AIP;SIRT4;CYCS;BAX;SLIRP;HSD17B10;BCL2L1
GO_Biological_Process_2021	cellular amide metabolic process (GO:0043603)	0.070102	0.174792	0	0	1.91284	5.08395	DHFR;PPP2CA;CYP2C9;SGPL1;MTRR;PLPP3;PLPP2;PLPP1
GO_Biological_Process_2021	regulation of organelle assembly (GO:1902115)	0.0709702	0.176788	0	0	2.16034	5.71516	CYLD;TBC1D2;NPRL3;TBC1D2B;EZR;MAPK15
GO_Biological_Process_2021	cellular transition metal ion homeostasis (GO:0046916)	0.0713485	0.176788	0	0	2.01145	5.31058	APP;ARF1;ATP6AP1;LCK;TMPRSS6;HMOX1;NEDD8
GO_Biological_Process_2021	protein polymerization (GO:0051258)	0.0717164	0.176788	0	0	2.36598	6.23445	ARL6;PIN1;RAC1;MAPT;JAK2
GO_Biological_Process_2021	axonogenesis (GO:0007409)	0.0723988	0.176788	0	0	1.58774	4.16873	APP;GRB7;SRC;LAMA1;PTEN;CXCR4;PRKCA;PTPN11;PPP3CB;RPS6KA5;PIK3CA;PTPRA;MAPK1;EZR
GO_Biological_Process_2021	protein localization to plasma membrane (GO:0072659)	0.0730918	0.176788	0	0	1.81359	4.74441	RAP2A;RAP1A;ROCK1;ROCK2;STXBP1;ADIPOQ;EZR;TNF;RAB11A
GO_Biological_Process_2021	calcium ion transmembrane import into cytosol (GO:0097553)	0.0731679	0.176788	0	0	2.68841	7.03019	PTPRC;LCK;ITPR1;TRPV1
GO_Biological_Process_2021	positive regulation of epithelial to mesenchymal transition (GO:0010718)	0.0731679	0.176788	0	0	2.68841	7.03019	IL6;TGFB1;TWIST1;CTNNB1
GO_Biological_Process_2021	regulation of double-strand break repair (GO:2000779)	0.0731679	0.176788	0	0	2.68841	7.03019	PPP4C;RAD51;CHEK1;TWIST1
GO_Biological_Process_2021	adipose tissue development (GO:0060612)	0.0732893	0.176788	0	0	5.10186	13.3329	NAMPT;RORC
GO_Biological_Process_2021	angiotensin maturation (GO:0002003)	0.0732893	0.176788	0	0	5.10186	13.3329	CMA1;CTSG
GO_Biological_Process_2021	autophagy of peroxisome (GO:0030242)	0.0732893	0.176788	0	0	5.10186	13.3329	ATM;PIK3C3
GO_Biological_Process_2021	catecholamine biosynthetic process (GO:0042423)	0.0732893	0.176788	0	0	5.10186	13.3329	DDC;GATA3
GO_Biological_Process_2021	cellular response to growth hormone stimulus (GO:0071378)	0.0732893	0.176788	0	0	5.10186	13.3329	STAT3;JAK2
GO_Biological_Process_2021	cellular response to thyroid hormone stimulus (GO:0097067)	0.0732893	0.176788	0	0	5.10186	13.3329	THRB;GATA1
GO_Biological_Process_2021	chromatin assembly or disassembly (GO:0006333)	0.0732893	0.176788	0	0	5.10186	13.3329	SUPT16H;TP53
GO_Biological_Process_2021	eye photoreceptor cell differentiation (GO:0001754)	0.0732893	0.176788	0	0	5.10186	13.3329	STAT3;VEGFA
GO_Biological_Process_2021	histone H3-K9 demethylation (GO:0033169)	0.0732893	0.176788	0	0	5.10186	13.3329	KDM4A;KDM4E
GO_Biological_Process_2021	intrinsic apoptotic signaling pathway in response to oxidative stress (GO:0008631)	0.0732893	0.176788	0	0	5.10186	13.3329	PRKCD;CYP1B1
GO_Biological_Process_2021	megakaryocyte differentiation (GO:0030219)	0.0732893	0.176788	0	0	5.10186	13.3329	THPO;GATA1
GO_Biological_Process_2021	mitochondrion distribution (GO:0048311)	0.0732893	0.176788	0	0	5.10186	13.3329	LRRK2;MAPT
GO_Biological_Process_2021	negative regulation of cardiac muscle hypertrophy (GO:0010614)	0.0732893	0.176788	0	0	5.10186	13.3329	LMNA;FOXO1
GO_Biological_Process_2021	negative regulation of cell division (GO:0051782)	0.0732893	0.176788	0	0	5.10186	13.3329	BLM;TXNIP
GO_Biological_Process_2021	negative regulation of heart contraction (GO:0045822)	0.0732893	0.176788	0	0	5.10186	13.3329	FKBP1B;SPX
GO_Biological_Process_2021	negative regulation of hemostasis (GO:1900047)	0.0732893	0.176788	0	0	5.10186	13.3329	PROC;SERPINE1
GO_Biological_Process_2021	negative regulation of histone acetylation (GO:0035067)	0.0732893	0.176788	0	0	5.10186	13.3329	SDR16C5;BRCA1
GO_Biological_Process_2021	negative regulation of microtubule polymerization (GO:0031115)	0.0732893	0.176788	0	0	5.10186	13.3329	DYRK1A;MAPRE1
GO_Biological_Process_2021	negative regulation of vascular permeability (GO:0043116)	0.0732893	0.176788	0	0	5.10186	13.3329	ANGPT1;VEGFA
GO_Biological_Process_2021	phosphate ion transmembrane transport (GO:0035435)	0.0732893	0.176788	0	0	5.10186	13.3329	SLC25A10;SLC25A11
GO_Biological_Process_2021	positive regulation of branching involved in ureteric bud morphogenesis (GO:0090190)	0.0732893	0.176788	0	0	5.10186	13.3329	NOG;VEGFA
GO_Biological_Process_2021	positive regulation of cardiocyte differentiation (GO:1905209)	0.0732893	0.176788	0	0	5.10186	13.3329	TGFB1;GATA4
GO_Biological_Process_2021	positive regulation of fatty acid oxidation (GO:0046321)	0.0732893	0.176788	0	0	5.10186	13.3329	TWIST1;PPARA
GO_Biological_Process_2021	positive regulation of leukocyte proliferation (GO:0070665)	0.0732893	0.176788	0	0	5.10186	13.3329	LYN;MAPK1
GO_Biological_Process_2021	positive regulation of metaphase/anaphase transition of cell cycle (GO:1902101)	0.0732893	0.176788	0	0	5.10186	13.3329	RB1;CUL3
GO_Biological_Process_2021	positive regulation of mitotic metaphase/anaphase transition (GO:0045842)	0.0732893	0.176788	0	0	5.10186	13.3329	RB1;CUL3
GO_Biological_Process_2021	positive regulation of mitotic sister chromatid separation (GO:1901970)	0.0732893	0.176788	0	0	5.10186	13.3329	RB1;CUL3
GO_Biological_Process_2021	positive regulation of neuroinflammatory response (GO:0150078)	0.0732893	0.176788	0	0	5.10186	13.3329	IL6;TNF
GO_Biological_Process_2021	positive regulation of ubiquitin protein ligase activity (GO:1904668)	0.0732893	0.176788	0	0	5.10186	13.3329	PLK1;PTEN
GO_Biological_Process_2021	regulation of angiotensin levels in blood (GO:0002002)	0.0732893	0.176788	0	0	5.10186	13.3329	CMA1;CTSG
GO_Biological_Process_2021	regulation of B cell apoptotic process (GO:0002902)	0.0732893	0.176788	0	0	5.10186	13.3329	LYN;IL10
GO_Biological_Process_2021	regulation of CD4-positive, alpha-beta T cell differentiation (GO:0043370)	0.0732893	0.176788	0	0	5.10186	13.3329	CBFB;HMGB1
GO_Biological_Process_2021	regulation of DNA-dependent DNA replication (GO:0090329)	0.0732893	0.176788	0	0	5.10186	13.3329	BLM;GMNN
GO_Biological_Process_2021	regulation of feeding behavior (GO:0060259)	0.0732893	0.176788	0	0	5.10186	13.3329	STAT3;INS
GO_Biological_Process_2021	regulation of hemopoiesis (GO:1903706)	0.0732893	0.176788	0	0	5.10186	13.3329	CSF2;CBFB
GO_Biological_Process_2021	regulation of sensory perception (GO:0051931)	0.0732893	0.176788	0	0	5.10186	13.3329	SPX;MGLL
GO_Biological_Process_2021	tyrosine metabolic process (GO:0006570)	0.0732893	0.176788	0	0	5.10186	13.3329	TAT;TYR
GO_Biological_Process_2021	lamellipodium assembly (GO:0030032)	0.0734458	0.176788	0	0	3.32946	8.69392	P2RY12;RAC1;RHOD
GO_Biological_Process_2021	negative regulation of cell development (GO:0010721)	0.0734458	0.176788	0	0	3.32946	8.69392	GSK3B;IL6;TNF
GO_Biological_Process_2021	negative regulation of macroautophagy (GO:0016242)	0.0734458	0.176788	0	0	3.32946	8.69392	PIK3CA;LRRK2;AKT1
GO_Biological_Process_2021	negative regulation of protein localization to membrane (GO:1905476)	0.0734458	0.176788	0	0	3.32946	8.69392	TGFB1;RHOQ;BCL2L1
GO_Biological_Process_2021	negative regulation of receptor-mediated endocytosis (GO:0048261)	0.0734458	0.176788	0	0	3.32946	8.69392	APP;ADIPOQ;RAC1
GO_Biological_Process_2021	negative regulation of signaling receptor activity (GO:2000272)	0.0734458	0.176788	0	0	3.32946	8.69392	PPARG;PPARA;TNF
GO_Biological_Process_2021	positive regulation of filopodium assembly (GO:0051491)	0.0734458	0.176788	0	0	3.32946	8.69392	CDC42;RALA;RHOQ
GO_Biological_Process_2021	positive regulation of G1/S transition of mitotic cell cycle (GO:1900087)	0.0734458	0.176788	0	0	3.32946	8.69392	CCND1;AKT1;EGFR
GO_Biological_Process_2021	positive regulation of histone methylation (GO:0031062)	0.0734458	0.176788	0	0	3.32946	8.69392	KMT2A;CTNNB1;BRCA1
GO_Biological_Process_2021	regulation of glycogen biosynthetic process (GO:0005979)	0.0734458	0.176788	0	0	3.32946	8.69392	GSK3B;AKT1;INS
GO_Biological_Process_2021	regulation of mitotic metaphase/anaphase transition (GO:0030071)	0.0734458	0.176788	0	0	3.32946	8.69392	RB1;CUL3;PLK1
GO_Biological_Process_2021	regulation of monocyte chemotaxis (GO:0090025)	0.0734458	0.176788	0	0	3.32946	8.69392	LYN;SERPINE1;HMGB1
GO_Biological_Process_2021	positive regulation of cold-induced thermogenesis (GO:0120162)	0.0745259	0.179278	0	0	1.98899	5.16464	SYK;ADIPOQ;CXCR4;JAK2;TSHR;DECR1;VEGFA
GO_Biological_Process_2021	regulation of translation (GO:0006417)	0.075513	0.181543	0	0	1.68667	4.35743	DHFR;APP;GRB7;IL6;RPS6KB1;RPS6KA1;ERBB2;HSPB1;GZMB;MAPKAPK5;LARP6
GO_Biological_Process_2021	cellular response to chemokine (GO:1990869)	0.0759271	0.182428	0	0	2.32284	5.98825	CXCL8;CCL20;CXCL13;CXCL2;RHOA
GO_Biological_Process_2021	T cell receptor signaling pathway (GO:0050852)	0.0772712	0.185545	0	0	1.72958	4.42849	PTPRC;PIK3CA;PDPK1;LCK;CSK;GATA3;EIF2B1;SKAP1;NFKB1;RELA
GO_Biological_Process_2021	regulation of neuron apoptotic process (GO:0043523)	0.0777853	0.186666	0	0	1.96703	5.02341	MAG;DDIT3;BCL2;BAX;CTNNB1;NAE1;TNF
GO_Biological_Process_2021	negative regulation of NF-kappaB transcription factor activity (GO:0032088)	0.078245	0.187428	0	0	2.10093	5.35299	IL10;NFKBIA;CYLD;DDIT3;CYP1B1;NLRP3
GO_Biological_Process_2021	positive regulation of proteasomal ubiquitin-dependent protein catabolic process (GO:0032436)	0.078245	0.187428	0	0	2.10093	5.35299	GSK3B;CSNK1A1;LRRK2;PLK1;KEAP1;NFE2L2
GO_Biological_Process_2021	positive regulation of ubiquitin-dependent protein catabolic process (GO:2000060)	0.078245	0.187428	0	0	2.10093	5.35299	GSK3B;CSNK1A1;LRRK2;PLK1;PTEN;KEAP1
GO_Biological_Process_2021	DNA-dependent DNA replication maintenance of fidelity (GO:0045005)	0.0783762	0.187516	0	0	2.61934	6.66946	BLM;PCNA;RAD51;MCM9
GO_Biological_Process_2021	negative regulation of type I interferon production (GO:0032480)	0.0783762	0.187516	0	0	2.61934	6.66946	IL10;CYLD;PPM1B;PIN1
GO_Biological_Process_2021	B cell differentiation (GO:0030183)	0.0802687	0.19098	0	0	2.28124	5.75416	IL10;PTPRC;IFNB1;CEBPG;PTPN2
GO_Biological_Process_2021	iron ion homeostasis (GO:0055072)	0.0802687	0.19098	0	0	2.28124	5.75416	BDH2;ATP6AP1;TMPRSS6;HMOX1;NEDD8
GO_Biological_Process_2021	negative regulation of response to stimulus (GO:0048585)	0.0802687	0.19098	0	0	2.28124	5.75416	LYN;PTPN1;MAP3K3;NR1H2;TWIST1
GO_Biological_Process_2021	camera-type eye development (GO:0043010)	0.0804024	0.19098	0	0	3.19057	8.04251	LAMA1;CYP1B1;VEGFA
GO_Biological_Process_2021	cytoplasmic pattern recognition receptor signaling pathway (GO:0002753)	0.0804024	0.19098	0	0	3.19057	8.04251	CYLD;CASP8;TAB1
GO_Biological_Process_2021	dendritic spine organization (GO:0097061)	0.0804024	0.19098	0	0	3.19057	8.04251	CDC42;ARF1;PTEN
GO_Biological_Process_2021	microtubule polymerization or depolymerization (GO:0031109)	0.0804024	0.19098	0	0	3.19057	8.04251	PIN1;STMN4;MAPT
GO_Biological_Process_2021	modulation of excitatory postsynaptic potential (GO:0098815)	0.0804024	0.19098	0	0	3.19057	8.04251	APP;LRRK2;PTEN
GO_Biological_Process_2021	negative regulation of protein polymerization (GO:0032272)	0.0804024	0.19098	0	0	3.19057	8.04251	PRKCD;DYRK1A;MAPRE1
GO_Biological_Process_2021	positive regulation of cellular component movement (GO:0051272)	0.0804024	0.19098	0	0	3.19057	8.04251	LYN;TWIST1;VEGFA
GO_Biological_Process_2021	positive regulation of nitric oxide biosynthetic process (GO:0045429)	0.0804024	0.19098	0	0	3.19057	8.04251	AKT1;PTGS2;TNF
GO_Biological_Process_2021	release of sequestered calcium ion into cytosol (GO:0051209)	0.0804024	0.19098	0	0	3.19057	8.04251	PTPRC;LCK;ITPR1
GO_Biological_Process_2021	positive regulation of stress-activated MAPK cascade (GO:0032874)	0.0811266	0.192585	0	0	1.94555	4.88672	APP;TAOK3;TRAF2;HMGB1;HRAS;KLHDC10;VEGFA
GO_Biological_Process_2021	glycerophospholipid metabolic process (GO:0006650)	0.082034	0.194622	0	0	2.07243	5.18237	CETP;PLA2G1B;PIGA;PGP;CRLS1;PRDX6
GO_Biological_Process_2021	branching morphogenesis of an epithelial tube (GO:0048754)	0.0837641	0.196242	0	0	2.55372	6.3326	CTNNB1;MET;NKX3-1;VEGFA
GO_Biological_Process_2021	cardiac ventricle morphogenesis (GO:0003208)	0.0837641	0.196242	0	0	2.55372	6.3326	FKBP1A;TGFB1;GATA4;GATA3
GO_Biological_Process_2021	positive regulation of osteoblast differentiation (GO:0045669)	0.0837641	0.196242	0	0	2.55372	6.3326	IL6;ATP6AP1;HGF;PRKD1
GO_Biological_Process_2021	protein localization to cell periphery (GO:1990778)	0.0840932	0.196242	0	0	1.75784	4.35211	RAP2A;RAP1A;ROCK1;ROCK2;STXBP1;ADIPOQ;EZR;TNF;RAB11A
GO_Biological_Process_2021	carboxylic acid biosynthetic process (GO:0046394)	0.0845084	0.196242	0	0	4.63781	11.4596	CYP2C9;CARNS1
GO_Biological_Process_2021	cardiac right ventricle morphogenesis (GO:0003215)	0.0845084	0.196242	0	0	4.63781	11.4596	GATA4;GATA3
GO_Biological_Process_2021	cellular response to interleukin-15 (GO:0071350)	0.0845084	0.196242	0	0	4.63781	11.4596	STAT3;JAK1
GO_Biological_Process_2021	cytoplasmic sequestering of protein (GO:0051220)	0.0845084	0.196242	0	0	4.63781	11.4596	NFKBIA;KEAP1
GO_Biological_Process_2021	glucan biosynthetic process (GO:0009250)	0.0845084	0.196242	0	0	4.63781	11.4596	GYS2;GYS1
GO_Biological_Process_2021	glycogen biosynthetic process (GO:0005978)	0.0845084	0.196242	0	0	4.63781	11.4596	GYS2;GYS1
GO_Biological_Process_2021	icosanoid secretion (GO:0032309)	0.0845084	0.196242	0	0	4.63781	11.4596	NOS2;PLA2G1B
GO_Biological_Process_2021	interleukin-15-mediated signaling pathway (GO:0035723)	0.0845084	0.196242	0	0	4.63781	11.4596	STAT3;JAK1
GO_Biological_Process_2021	lipid oxidation (GO:0034440)	0.0845084	0.196242	0	0	4.63781	11.4596	ADIPOQ;ALOX15
GO_Biological_Process_2021	mitochondrion transport along microtubule (GO:0047497)	0.0845084	0.196242	0	0	4.63781	11.4596	MAPT;HIF1A
GO_Biological_Process_2021	negative regulation by host of viral transcription (GO:0043922)	0.0845084	0.196242	0	0	4.63781	11.4596	JUN;HDAC1
GO_Biological_Process_2021	negative regulation of cellular senescence (GO:2000773)	0.0845084	0.196242	0	0	4.63781	11.4596	MAP3K3;TWIST1
GO_Biological_Process_2021	negative regulation of DNA-dependent DNA replication (GO:2000104)	0.0845084	0.196242	0	0	4.63781	11.4596	BLM;GMNN
GO_Biological_Process_2021	negative regulation of endoplasmic reticulum unfolded protein response (GO:1900102)	0.0845084	0.196242	0	0	4.63781	11.4596	PTPN1;BFAR
GO_Biological_Process_2021	negative regulation of reactive oxygen species biosynthetic process (GO:1903427)	0.0845084	0.196242	0	0	4.63781	11.4596	PPARA;INS
GO_Biological_Process_2021	positive regulation of cell aging (GO:0090343)	0.0845084	0.196242	0	0	4.63781	11.4596	ARG2;LMNA
GO_Biological_Process_2021	positive regulation of cellular carbohydrate metabolic process (GO:0010676)	0.0845084	0.196242	0	0	4.63781	11.4596	AKT1;PTH1R
GO_Biological_Process_2021	positive regulation of insulin receptor signaling pathway (GO:0046628)	0.0845084	0.196242	0	0	4.63781	11.4596	PTPN11;INS
GO_Biological_Process_2021	positive regulation of ruffle assembly (GO:1900029)	0.0845084	0.196242	0	0	4.63781	11.4596	P2RY12;HRAS
GO_Biological_Process_2021	protein neddylation (GO:0045116)	0.0845084	0.196242	0	0	4.63781	11.4596	NEDD8;NAE1
GO_Biological_Process_2021	pteridine-containing compound metabolic process (GO:0042558)	0.0845084	0.196242	0	0	4.63781	11.4596	NOS3;AKT1
GO_Biological_Process_2021	purine nucleotide catabolic process (GO:0006195)	0.0845084	0.196242	0	0	4.63781	11.4596	NT5E;GPX1
GO_Biological_Process_2021	purine ribonucleoside triphosphate metabolic process (GO:0009205)	0.0845084	0.196242	0	0	4.63781	11.4596	LRRK2;RHOQ
GO_Biological_Process_2021	purine-containing compound catabolic process (GO:0072523)	0.0845084	0.196242	0	0	4.63781	11.4596	NT5E;GPX1
GO_Biological_Process_2021	regulation of chemokine (C-X-C motif) ligand 2 production (GO:2000341)	0.0845084	0.196242	0	0	4.63781	11.4596	HMGB1;TNF
GO_Biological_Process_2021	regulation of membrane repolarization (GO:0060306)	0.0845084	0.196242	0	0	4.63781	11.4596	YWHAE;KCNH2
GO_Biological_Process_2021	regulation of mRNA metabolic process (GO:1903311)	0.0845084	0.196242	0	0	4.63781	11.4596	SAFB2;SAFB
GO_Biological_Process_2021	regulation of response to stress (GO:0080134)	0.0845084	0.196242	0	0	4.63781	11.4596	IL10;ABCB1
GO_Biological_Process_2021	response to interleukin-6 (GO:0070741)	0.0845084	0.196242	0	0	4.63781	11.4596	RELA;NFKB1
GO_Biological_Process_2021	response to iron ion (GO:0010039)	0.0845084	0.196242	0	0	4.63781	11.4596	BCL2;HIF1A
GO_Biological_Process_2021	response to nitric oxide (GO:0071731)	0.0845084	0.196242	0	0	4.63781	11.4596	CDK2;FOXO1
GO_Biological_Process_2021	transport along microtubule (GO:0010970)	0.0845084	0.196242	0	0	4.63781	11.4596	CDC42;APP
GO_Biological_Process_2021	regulation of transforming growth factor beta receptor signaling pathway (GO:0017015)	0.0845497	0.196242	0	0	1.92453	4.75439	FKBP1A;PPM1A;SPRED1;TGFB1;PDPK1;PIN1;PPARA
GO_Biological_Process_2021	glucose metabolic process (GO:0006006)	0.0847399	0.196454	0	0	2.24111	5.53143	ADIPOQ;AKR1A1;SLC25A10;SLC25A11;PPARD
GO_Biological_Process_2021	response to retinoic acid (GO:0032526)	0.0847399	0.196454	0	0	2.24111	5.53143	LYN;RXRA;HSD17B2;GATA6;ATM
GO_Biological_Process_2021	macromolecule catabolic process (GO:0009057)	0.0876322	0.202095	0	0	3.06279	7.45669	TGFB1;CTRL;ELANE
GO_Biological_Process_2021	mucosal immune response (GO:0002385)	0.0876322	0.202095	0	0	3.06279	7.45669	NOS2;PLA2G1B;RNASE3
GO_Biological_Process_2021	negative regulation of axonogenesis (GO:0050771)	0.0876322	0.202095	0	0	3.06279	7.45669	MAG;PTEN;RHOA
GO_Biological_Process_2021	negative regulation of phosphatase activity (GO:0010923)	0.0876322	0.202095	0	0	3.06279	7.45669	FKBP1A;GSK3B;FKBP1B
GO_Biological_Process_2021	positive regulation of nitric oxide metabolic process (GO:1904407)	0.0876322	0.202095	0	0	3.06279	7.45669	AKT1;PTGS2;TNF
GO_Biological_Process_2021	regulation of B cell activation (GO:0050864)	0.0876322	0.202095	0	0	3.06279	7.45669	IL10;IL6;AHR
GO_Biological_Process_2021	regulation of immunoglobulin production (GO:0002637)	0.0876322	0.202095	0	0	3.06279	7.45669	IL10;IL6;PTPRC
GO_Biological_Process_2021	regulation of multicellular organismal development (GO:2000026)	0.0876322	0.202095	0	0	3.06279	7.45669	KAT2A;RAB14;GATA3
GO_Biological_Process_2021	regulation of plasma membrane bounded cell projection organization (GO:0120035)	0.0876322	0.202095	0	0	3.06279	7.45669	GSK3B;PTEN;AKT1
GO_Biological_Process_2021	positive regulation of cell cycle process (GO:0090068)	0.0880541	0.20295	0	0	1.90396	4.62624	CDC42;FEN1;EGF;CUL3;RHOA;CDC25B;INS
GO_Biological_Process_2021	cellular macromolecule biosynthetic process (GO:0034645)	0.0885319	0.203932	0	0	1.46754	3.55788	FEN1;BLM;THRB;MCM7;MCM9;REV1;BRCA1;PPP5C;COPS5;CDC45;CHEK1;CDK2;ATM;POLL;TOP1;MRRF;MCM2
GO_Biological_Process_2021	positive regulation of Notch signaling pathway (GO:0045747)	0.0893283	0.205434	0	0	2.49131	6.0176	SRC;NOS3;STAT3;GATA5
GO_Biological_Process_2021	actin cytoskeleton reorganization (GO:0031532)	0.0893395	0.205434	0	0	2.20235	5.31936	PTPN1;RAP2A;RALA;EZR;RHOA
GO_Biological_Process_2021	amyloid fibril formation (GO:1990000)	0.0893395	0.205434	0	0	2.20235	5.31936	FKBP1A;APP;NPPA;MAPT;INS
GO_Biological_Process_2021	regulation of gene expression, epigenetic (GO:0040029)	0.0899128	0.206632	0	0	2.01768	4.86043	DIRAS3;KAT2A;GPX1;EED;PPM1D;MPHOSPH8
GO_Biological_Process_2021	regulation of cell death (GO:0010941)	0.0916397	0.210479	0	0	1.88382	4.50212	LRP1;LRRK2;HP;RRAS2;PRKD1;HPR;NKX3-1
GO_Biological_Process_2021	heart development (GO:0007507)	0.0933545	0.214255	0	0	1.66168	3.94042	FKBP1A;KAT2A;TGFB1;CASP8;FN1;PTEN;GATA5;GATA4;PTPN11;VEGFA
GO_Biological_Process_2021	epidermis development (GO:0008544)	0.0940011	0.214255	0	0	1.99138	4.70851	HDAC1;KLK5;GATA6;KLK14;TGM5;KLK7
GO_Biological_Process_2021	negative regulation of cell cycle process (GO:0010948)	0.0940658	0.214255	0	0	2.16491	5.11733	RAD51;EED;EHMT2;CHEK1;BRCA1
GO_Biological_Process_2021	protein catabolic process (GO:0030163)	0.0940658	0.214255	0	0	2.16491	5.11733	NEU2;CELA2A;CTRL;CTSD;ELANE
GO_Biological_Process_2021	regulation of cellular ketone metabolic process (GO:0010565)	0.0940658	0.214255	0	0	2.16491	5.11733	NQO1;NR1H4;PRKAG2;PPARA;INS
GO_Biological_Process_2021	regulation of double-strand break repair via homologous recombination (GO:0010569)	0.0950654	0.214255	0	0	2.43186	5.72264	PPP4C;RAD51;PARP1;CHEK1
GO_Biological_Process_2021	beta-catenin-TCF complex assembly (GO:1904837)	0.0951246	0.214255	0	0	2.94484	6.92792	HDAC1;CTNNB1;ASH2L
GO_Biological_Process_2021	lamellipodium organization (GO:0097581)	0.0951246	0.214255	0	0	2.94484	6.92792	P2RY12;RAC1;RHOD
GO_Biological_Process_2021	mismatch repair (GO:0006298)	0.0951246	0.214255	0	0	2.94484	6.92792	PCNA;MCM9;ERCC1
GO_Biological_Process_2021	negative regulation of interferon-gamma production (GO:0032689)	0.0951246	0.214255	0	0	2.94484	6.92792	DDIT3;NR1H4;HMGB1
GO_Biological_Process_2021	positive regulation of extrinsic apoptotic signaling pathway (GO:2001238)	0.0951246	0.214255	0	0	2.94484	6.92792	CYLD;TRAF2;TNF
GO_Biological_Process_2021	protein ADP-ribosylation (GO:0006471)	0.0951246	0.214255	0	0	2.94484	6.92792	ARF4;PARP1;SIRT4
GO_Biological_Process_2021	regulation of DNA biosynthetic process (GO:2000278)	0.0951246	0.214255	0	0	2.94484	6.92792	HGF;ADIPOQ;ATM
GO_Biological_Process_2021	regulation of response to biotic stimulus (GO:0002831)	0.0951246	0.214255	0	0	2.94484	6.92792	FGR;CASP8;GATA6
GO_Biological_Process_2021	regulation of ubiquitin-protein transferase activity (GO:0051438)	0.0951246	0.214255	0	0	2.94484	6.92792	BAG5;PLK1;PIN1
GO_Biological_Process_2021	transition metal ion homeostasis (GO:0055076)	0.0951246	0.214255	0	0	2.94484	6.92792	BDH2;TMPRSS6;HMOX1
GO_Biological_Process_2021	chromatin remodeling (GO:0006338)	0.0953059	0.214255	0	0	1.8641	4.38186	RB1;KDM4A;KAT2A;HDAC1;KDM4E;TOP1;ESR1
GO_Biological_Process_2021	branching involved in blood vessel morphogenesis (GO:0001569)	0.096204	0.214255	0	0	4.25111	9.95305	CTNNB1;VEGFA
GO_Biological_Process_2021	C4-dicarboxylate transport (GO:0015740)	0.096204	0.214255	0	0	4.25111	9.95305	SLC25A10;SLC25A11
GO_Biological_Process_2021	cellular copper ion homeostasis (GO:0006878)	0.096204	0.214255	0	0	4.25111	9.95305	APP;ARF1
GO_Biological_Process_2021	cellular response to low-density lipoprotein particle stimulus (GO:0071404)	0.096204	0.214255	0	0	4.25111	9.95305	SYK;PPARG
GO_Biological_Process_2021	ceramide transport (GO:0035627)	0.096204	0.214255	0	0	4.25111	9.95305	ABCB1;SGPP1
GO_Biological_Process_2021	cGMP-mediated signaling (GO:0019934)	0.096204	0.214255	0	0	4.25111	9.95305	NPPA;INS
GO_Biological_Process_2021	dicarboxylic acid catabolic process (GO:0043649)	0.096204	0.214255	0	0	4.25111	9.95305	GAD1;ACSF3
GO_Biological_Process_2021	ether lipid metabolic process (GO:0046485)	0.096204	0.214255	0	0	4.25111	9.95305	DHRS7B;AGPS
GO_Biological_Process_2021	immune response-regulating cell surface receptor signaling pathway (GO:0002768)	0.096204	0.214255	0	0	4.25111	9.95305	LYN;FGR
GO_Biological_Process_2021	low-density lipoprotein particle remodeling (GO:0034374)	0.096204	0.214255	0	0	4.25111	9.95305	CETP;LPA
GO_Biological_Process_2021	membrane repolarization during action potential (GO:0086011)	0.096204	0.214255	0	0	4.25111	9.95305	YWHAE;KCNH2
GO_Biological_Process_2021	NAD biosynthesis via nicotinamide riboside salvage pathway (GO:0034356)	0.096204	0.214255	0	0	4.25111	9.95305	NAMPT;PTGS2
GO_Biological_Process_2021	negative regulation of coagulation (GO:0050819)	0.096204	0.214255	0	0	4.25111	9.95305	PROC;SERPINE1
GO_Biological_Process_2021	negative regulation of DNA damage response, signal transduction by p53 class mediator (GO:0043518)	0.096204	0.214255	0	0	4.25111	9.95305	DYRK1A;TWIST1
GO_Biological_Process_2021	negative regulation of secretion (GO:0051048)	0.096204	0.214255	0	0	4.25111	9.95305	EGF;SPX
GO_Biological_Process_2021	negative regulation of T cell mediated immunity (GO:0002710)	0.096204	0.214255	0	0	4.25111	9.95305	PTPRC;AHR
GO_Biological_Process_2021	positive regulation of cellular response to insulin stimulus (GO:1900078)	0.096204	0.214255	0	0	4.25111	9.95305	PTPN11;INS
GO_Biological_Process_2021	positive regulation of glucose metabolic process (GO:0010907)	0.096204	0.214255	0	0	4.25111	9.95305	AKT1;PTPN2
GO_Biological_Process_2021	positive regulation of glycogen biosynthetic process (GO:0045725)	0.096204	0.214255	0	0	4.25111	9.95305	AKT1;INS
GO_Biological_Process_2021	positive regulation of leukocyte degranulation (GO:0043302)	0.096204	0.214255	0	0	4.25111	9.95305	FGR;SYK
GO_Biological_Process_2021	positive regulation of long-term synaptic potentiation (GO:1900273)	0.096204	0.214255	0	0	4.25111	9.95305	APP;INS
GO_Biological_Process_2021	positive regulation of protein deacetylation (GO:0090312)	0.096204	0.214255	0	0	4.25111	9.95305	SDR16C5;DYRK1A
GO_Biological_Process_2021	positive regulation of SMAD protein signal transduction (GO:0060391)	0.096204	0.214255	0	0	4.25111	9.95305	TGFB1;JAK2
GO_Biological_Process_2021	positive regulation of T cell receptor signaling pathway (GO:0050862)	0.096204	0.214255	0	0	4.25111	9.95305	LCK;RELA
GO_Biological_Process_2021	positive regulation of type 2 immune response (GO:0002830)	0.096204	0.214255	0	0	4.25111	9.95305	IL6;NLRP3
GO_Biological_Process_2021	protein modification by small protein conjugation or removal (GO:0070647)	0.096204	0.214255	0	0	4.25111	9.95305	NAE1;SAE1
GO_Biological_Process_2021	regulation of cAMP-dependent protein kinase activity (GO:2000479)	0.096204	0.214255	0	0	4.25111	9.95305	ADIPOQ;MST1
GO_Biological_Process_2021	regulation of lamellipodium organization (GO:1902743)	0.096204	0.214255	0	0	4.25111	9.95305	CDC42;RAC1
GO_Biological_Process_2021	regulation of nitric-oxide synthase biosynthetic process (GO:0051769)	0.096204	0.214255	0	0	4.25111	9.95305	NAMPT;JAK2
GO_Biological_Process_2021	regulation of sensory perception of pain (GO:0051930)	0.096204	0.214255	0	0	4.25111	9.95305	SPX;MGLL
GO_Biological_Process_2021	regulation of vasculogenesis (GO:2001212)	0.096204	0.214255	0	0	4.25111	9.95305	RAP1A;RRAS
GO_Biological_Process_2021	response to X-ray (GO:0010165)	0.096204	0.214255	0	0	4.25111	9.95305	BLM;ATM
GO_Biological_Process_2021	smooth muscle contraction (GO:0006939)	0.096204	0.214255	0	0	4.25111	9.95305	ROCK1;ROCK2
GO_Biological_Process_2021	sodium-independent organic anion transport (GO:0043252)	0.096204	0.214255	0	0	4.25111	9.95305	SLCO1B1;SLCO1B3
GO_Biological_Process_2021	substrate-dependent cell migration (GO:0006929)	0.096204	0.214255	0	0	4.25111	9.95305	P2RY12;PTPRC
GO_Biological_Process_2021	sulfate transport (GO:0008272)	0.096204	0.214255	0	0	4.25111	9.95305	SLC25A10;SLC25A11
GO_Biological_Process_2021	vascular endothelial growth factor signaling pathway (GO:0038084)	0.096204	0.214255	0	0	4.25111	9.95305	PIK3CA;VEGFA
GO_Biological_Process_2021	defense response to symbiont (GO:0140546)	0.0980805	0.218312	0	0	1.7636	4.09502	IL6;PTPRC;APOBEC3G;IFNB1;BCL2;AZU1;RELA;BCL2L1
GO_Biological_Process_2021	mitotic cell cycle phase transition (GO:0044772)	0.0995657	0.221493	0	0	1.55944	3.59753	RB1;YWHAE;CCNB2;ABCB1;CCND1;RPS6KB1;CDK4;CUL3;PLK1;CDK2;MAPRE1;CDC25B
GO_Biological_Process_2021	glycosphingolipid metabolic process (GO:0006687)	0.100971	0.224368	0	0	2.37519	5.44611	NEU2;ARSA;ST8SIA1;GLA
GO_Biological_Process_2021	regulation of wound healing (GO:0061041)	0.100971	0.224368	0	0	2.37519	5.44611	PLAU;SERPINE1;F2;HRAS
GO_Biological_Process_2021	regulation of cell cycle G2/M phase transition (GO:1902749)	0.102472	0.227574	0	0	1.94076	4.42138	YWHAE;ATAD5;PLK1;CDK2;MAPRE1;TP53
GO_Biological_Process_2021	negative regulation of gene expression, epigenetic (GO:0045814)	0.102869	0.228072	0	0	2.83562	6.44906	EED;PPM1D;MPHOSPH8
GO_Biological_Process_2021	positive regulation of endopeptidase activity (GO:0010950)	0.102869	0.228072	0	0	2.83562	6.44906	LYN;ROCK2;STAT3
GO_Biological_Process_2021	regulation of long-term synaptic potentiation (GO:1900271)	0.102869	0.228072	0	0	2.83562	6.44906	APP;GSK3B;INS
GO_Biological_Process_2021	regulation of GTPase activity (GO:0043087)	0.103889	0.230085	0	0	1.58152	3.58125	GSK3B;TBC1D2;RAP1A;CCL20;LRRK2;ERBB2;PIN1;PRTN3;HRAS;MAPRE2;TGM2
GO_Biological_Process_2021	embryonic organ development (GO:0048568)	0.103892	0.230085	0	0	2.09371	4.741	CXCL8;TGFB1;KMT2A;GATA3;TNF
GO_Biological_Process_2021	negative regulation of cell growth (GO:0030308)	0.105045	0.232119	0	0	1.73353	3.90627	RB1;PPP2CA;MAG;TGFB1;EI24;TP53;ESR2;RERG
GO_Biological_Process_2021	negative regulation of growth (GO:0045926)	0.105045	0.232119	0	0	1.73353	3.90627	RB1;PPP2CA;TGFB1;EI24;TMPRSS4;TP53;ESR2;RERG
GO_Biological_Process_2021	phosphatidylinositol biosynthetic process (GO:0006661)	0.105045	0.232119	0	0	1.73353	3.90627	ARF3;ARF1;PIK3CA;RAB14;PIGA;PTEN;PIK3C3;CDIPT
GO_Biological_Process_2021	synapse organization (GO:0050808)	0.105045	0.232119	0	0	1.73353	3.90627	CDC42;APP;MUSK;LRRK2;PTEN;PIN1;MAPT;PTPRF
GO_Biological_Process_2021	chromosome organization (GO:0051276)	0.106784	0.234397	0	0	1.80733	4.04289	TOP2A;TOP2B;COPS5;PARP1;HDAC1;COPS8;SAFB
GO_Biological_Process_2021	regulation of interleukin-10 production (GO:0032653)	0.107042	0.234397	0	0	2.32108	5.18653	IL6;SYK;STAT3;HMGB1
GO_Biological_Process_2021	regulation of protein metabolic process (GO:0051246)	0.107042	0.234397	0	0	2.32108	5.18653	FKBP1A;APP;ROCK2;NEDD8
GO_Biological_Process_2021	substrate adhesion-dependent cell spreading (GO:0034446)	0.107042	0.234397	0	0	2.32108	5.18653	FN1;ILK;RAC1;RHOA
GO_Biological_Process_2021	acute-phase response (GO:0006953)	0.108324	0.234397	0	0	3.92389	8.72135	IL6;INS
GO_Biological_Process_2021	aflatoxin metabolic process (GO:0046222)	0.108324	0.234397	0	0	3.92389	8.72135	CYP1A2;CYP3A4
GO_Biological_Process_2021	C21-steroid hormone biosynthetic process (GO:0006700)	0.108324	0.234397	0	0	3.92389	8.72135	FDX1;AKR1B1
GO_Biological_Process_2021	cellular response to ATP (GO:0071318)	0.108324	0.234397	0	0	3.92389	8.72135	P2RY12;TRPV1
GO_Biological_Process_2021	cellular response to exogenous dsRNA (GO:0071360)	0.108324	0.234397	0	0	3.92389	8.72135	RALB;IFNB1
GO_Biological_Process_2021	central nervous system neuron development (GO:0021954)	0.108324	0.234397	0	0	3.92389	8.72135	PTEN;MAPT
GO_Biological_Process_2021	embryonic cranial skeleton morphogenesis (GO:0048701)	0.108324	0.234397	0	0	3.92389	8.72135	PDGFRA;TWIST1
GO_Biological_Process_2021	fatty acid beta-oxidation using acyl-CoA oxidase (GO:0033540)	0.108324	0.234397	0	0	3.92389	8.72135	AMACR;DECR2
GO_Biological_Process_2021	icosanoid biosynthetic process (GO:0046456)	0.108324	0.234397	0	0	3.92389	8.72135	CYP2C9;PLA2G1B
GO_Biological_Process_2021	macrophage migration (GO:1905517)	0.108324	0.234397	0	0	3.92389	8.72135	P2RY12;AZU1
GO_Biological_Process_2021	mammary gland epithelium development (GO:0061180)	0.108324	0.234397	0	0	3.92389	8.72135	AKT1;JAK2
GO_Biological_Process_2021	membrane repolarization during cardiac muscle cell action potential (GO:0086013)	0.108324	0.234397	0	0	3.92389	8.72135	YWHAE;KCNH2
GO_Biological_Process_2021	mitotic recombination (GO:0006312)	0.108324	0.234397	0	0	3.92389	8.72135	RAD51;ERCC1
GO_Biological_Process_2021	mycotoxin metabolic process (GO:0043385)	0.108324	0.234397	0	0	3.92389	8.72135	CYP1A2;CYP3A4
GO_Biological_Process_2021	negative regulation of cellular component movement (GO:0051271)	0.108324	0.234397	0	0	3.92389	8.72135	PIN1;GATA3
GO_Biological_Process_2021	negative regulation of endoplasmic reticulum stress-induced intrinsic apoptotic signaling pathway (GO:1902236)	0.108324	0.234397	0	0	3.92389	8.72135	LRRK2;BCL2L1
GO_Biological_Process_2021	negative regulation of protein processing (GO:0010955)	0.108324	0.234397	0	0	3.92389	8.72135	LRRK2;SERPINE1
GO_Biological_Process_2021	negative regulation of single stranded viral RNA replication via double stranded DNA intermediate (GO:0045869)	0.108324	0.234397	0	0	3.92389	8.72135	APOBEC3G;MPHOSPH8
GO_Biological_Process_2021	organic heteropentacyclic compound metabolic process (GO:1901376)	0.108324	0.234397	0	0	3.92389	8.72135	CYP1A2;CYP3A4
GO_Biological_Process_2021	peptidyl-tyrosine autophosphorylation (GO:0038083)	0.108324	0.234397	0	0	3.92389	8.72135	DYRK1A;EGFR
GO_Biological_Process_2021	positive regulation of DNA damage response, signal transduction by p53 class mediator (GO:0043517)	0.108324	0.234397	0	0	3.92389	8.72135	SPRED1;ATM
GO_Biological_Process_2021	positive regulation of glycogen metabolic process (GO:0070875)	0.108324	0.234397	0	0	3.92389	8.72135	AKT1;INS
GO_Biological_Process_2021	positive regulation of lyase activity (GO:0051349)	0.108324	0.234397	0	0	3.92389	8.72135	NOS2;NOS3
GO_Biological_Process_2021	positive regulation of osteoclast differentiation (GO:0045672)	0.108324	0.234397	0	0	3.92389	8.72135	ATP6AP1;TNF
GO_Biological_Process_2021	prostanoid biosynthetic process (GO:0046457)	0.108324	0.234397	0	0	3.92389	8.72135	PTGS2;PTGS1
GO_Biological_Process_2021	protein kinase A signaling (GO:0010737)	0.108324	0.234397	0	0	3.92389	8.72135	PRKACG;EZR
GO_Biological_Process_2021	regulation of branching involved in ureteric bud morphogenesis (GO:0090189)	0.108324	0.234397	0	0	3.92389	8.72135	NOG;VEGFA
GO_Biological_Process_2021	regulation of establishment of protein localization (GO:0070201)	0.108324	0.234397	0	0	3.92389	8.72135	PTP4A3;CTSD
GO_Biological_Process_2021	regulation of extracellular matrix organization (GO:1903053)	0.108324	0.234397	0	0	3.92389	8.72135	RB1;LRP1
GO_Biological_Process_2021	regulation of lymphocyte activation (GO:0051249)	0.108324	0.234397	0	0	3.92389	8.72135	KAT2A;LCK
GO_Biological_Process_2021	regulation of microglial cell activation (GO:1903978)	0.108324	0.234397	0	0	3.92389	8.72135	IL6;PTPRC
GO_Biological_Process_2021	regulation of secretion (GO:0051046)	0.108324	0.234397	0	0	3.92389	8.72135	EGF;SGK1
GO_Biological_Process_2021	regulation of sequestering of triglyceride (GO:0010889)	0.108324	0.234397	0	0	3.92389	8.72135	PPARG;PPARA
GO_Biological_Process_2021	response to acidic pH (GO:0010447)	0.108324	0.234397	0	0	3.92389	8.72135	TRPV1;RAB11B
GO_Biological_Process_2021	regulation of cytosolic calcium ion concentration (GO:0051480)	0.108909	0.235534	0	0	1.65598	3.6717	YWHAE;PDGFRA;PTGIR;FKBP1B;CXCR4;HMGB1;CXCL13;F2;ESR1
GO_Biological_Process_2021	activation of protein kinase B activity (GO:0032148)	0.110853	0.238177	0	0	2.73421	6.01403	PDPK1;AKT1;INS
GO_Biological_Process_2021	embryonic skeletal system morphogenesis (GO:0048704)	0.110853	0.238177	0	0	2.73421	6.01403	PDGFRA;NOG;TWIST1
GO_Biological_Process_2021	negative regulation of interleukin-6 production (GO:0032715)	0.110853	0.238177	0	0	2.73421	6.01403	IL10;PTPN6;TNF
GO_Biological_Process_2021	negative regulation of osteoblast differentiation (GO:0045668)	0.110853	0.238177	0	0	2.73421	6.01403	NOG;TWIST1;PPARG
GO_Biological_Process_2021	negative regulation of response to DNA damage stimulus (GO:2001021)	0.110853	0.238177	0	0	2.73421	6.01403	DYRK1A;TWIST1;BCL2L1
GO_Biological_Process_2021	positive regulation of mononuclear cell migration (GO:0071677)	0.110853	0.238177	0	0	2.73421	6.01403	SERPINE1;HMGB1;TNF
GO_Biological_Process_2021	positive regulation of ubiquitin-protein transferase activity (GO:0051443)	0.110853	0.238177	0	0	2.73421	6.01403	PLK1;PTEN;PIN1
GO_Biological_Process_2021	prostaglandin metabolic process (GO:0006693)	0.110853	0.238177	0	0	2.73421	6.01403	HPGD;PTGS2;PTGS1
GO_Biological_Process_2021	regulation of cellular component size (GO:0032535)	0.110853	0.238177	0	0	2.73421	6.01403	PTEN;RAC1;EZR
GO_Biological_Process_2021	regulation of cellular senescence (GO:2000772)	0.110853	0.238177	0	0	2.73421	6.01403	MAP3K3;ARG2;TWIST1
GO_Biological_Process_2021	regulation of developmental growth (GO:0048638)	0.110853	0.238177	0	0	2.73421	6.01403	APP;GSK3B;MUSK
GO_Biological_Process_2021	regulation of transmembrane receptor protein serine/threonine kinase signaling pathway (GO:0090092)	0.110853	0.238177	0	0	2.73421	6.01403	FKBP1A;TWSG1;TGFB1
GO_Biological_Process_2021	cellular protein metabolic process (GO:0044267)	0.112305	0.241166	0	0	1.35988	2.97344	APP;MBTPS1;MMP2;GATA6;FN1;PLG;KLK3;NEDD8;PLAT;F2;PHEX;F5;TGM1;IL6;COPS5;PROC;FDX1;CTSG;TGM5;MRRF;TGM3
GO_Biological_Process_2021	mitotic cytokinesis (GO:0000281)	0.113274	0.242984	0	0	2.26939	4.9426	ROCK1;ROCK2;PLK1;RHOB
GO_Biological_Process_2021	response to glucose (GO:0009749)	0.113274	0.242984	0	0	2.26939	4.9426	GYS2;PRKAA2;ADIPOQ;EIF2B1
GO_Biological_Process_2021	lipid transport (GO:0006869)	0.118968	0.254033	0	0	1.75389	3.73387	CETP;SLCO1B1;RXRA;SLC10A1;SLCO1B3;NR1H4;PPARD
GO_Biological_Process_2021	regulation of protein ubiquitination (GO:0031396)	0.118968	0.254033	0	0	1.75389	3.73387	FKBP1A;BAG5;ANGPT1;CUL3;LRRK2;AKT1;BRCA1
GO_Biological_Process_2021	activation of phospholipase C activity (GO:0007202)	0.119066	0.254033	0	0	2.63979	5.61767	P2RY12;SELE;EGFR
GO_Biological_Process_2021	cardiac muscle tissue morphogenesis (GO:0055008)	0.119066	0.254033	0	0	2.63979	5.61767	FKBP1A;TGFB1;NOG
GO_Biological_Process_2021	endodermal cell differentiation (GO:0035987)	0.119066	0.254033	0	0	2.63979	5.61767	MMP2;FN1;MMP9
GO_Biological_Process_2021	liver development (GO:0001889)	0.119066	0.254033	0	0	2.63979	5.61767	IL6;CEBPG;MET
GO_Biological_Process_2021	mitochondrial membrane organization (GO:0007006)	0.119066	0.254033	0	0	2.63979	5.61767	BCL2;SLC25A31;BCL2L1
GO_Biological_Process_2021	negative regulation of cell-matrix adhesion (GO:0001953)	0.119066	0.254033	0	0	2.63979	5.61767	SRC;SERPINE1;PTEN
GO_Biological_Process_2021	negative regulation of DNA biosynthetic process (GO:2000279)	0.119066	0.254033	0	0	2.63979	5.61767	SRC;ADIPOQ;TP53
GO_Biological_Process_2021	regulation of intracellular protein transport (GO:0033157)	0.119066	0.254033	0	0	2.63979	5.61767	PTPN1;TGFB1;ADIPOQ
GO_Biological_Process_2021	positive regulation of cell morphogenesis involved in differentiation (GO:0010770)	0.119662	0.254216	0	0	2.21994	4.71312	CDC42;ILK;RAC3;RAC1
GO_Biological_Process_2021	regulation of generation of precursor metabolites and energy (GO:0043467)	0.119662	0.254216	0	0	2.21994	4.71312	NOS2;PRKAG1;PRKAG2;HIF1A
GO_Biological_Process_2021	positive regulation of inflammatory response (GO:0050729)	0.120559	0.254216	0	0	1.84684	3.90721	NFKBIA;APP;IL6;SERPINE1;TNF;MAPK13
GO_Biological_Process_2021	activation of NF-kappaB-inducing kinase activity (GO:0007250)	0.12082	0.254216	0	0	3.64343	7.70021	TRAF2;COPS8
GO_Biological_Process_2021	apoptotic DNA fragmentation (GO:0006309)	0.12082	0.254216	0	0	3.64343	7.70021	CASP3;HMGB1
GO_Biological_Process_2021	aromatic amino acid family catabolic process (GO:0009074)	0.12082	0.254216	0	0	3.64343	7.70021	TAT;KYAT1
GO_Biological_Process_2021	B cell activation involved in immune response (GO:0002312)	0.12082	0.254216	0	0	3.64343	7.70021	IFNB1;BATF
GO_Biological_Process_2021	ceramide catabolic process (GO:0046514)	0.12082	0.254216	0	0	3.64343	7.70021	NEU2;GLA
GO_Biological_Process_2021	dendritic cell chemotaxis (GO:0002407)	0.12082	0.254216	0	0	3.64343	7.70021	CXCR4;HMGB1
GO_Biological_Process_2021	dendritic spine morphogenesis (GO:0060997)	0.12082	0.254216	0	0	3.64343	7.70021	CDC42;PTEN
GO_Biological_Process_2021	negative regulation of cell-substrate junction organization (GO:0150118)	0.12082	0.254216	0	0	3.64343	7.70021	SRC;PTEN
GO_Biological_Process_2021	negative regulation of epithelial cell differentiation (GO:0030857)	0.12082	0.254216	0	0	3.64343	7.70021	SPRED1;MMP9
GO_Biological_Process_2021	negative regulation of focal adhesion assembly (GO:0051895)	0.12082	0.254216	0	0	3.64343	7.70021	SRC;PTEN
GO_Biological_Process_2021	negative regulation of receptor signaling pathway via JAK-STAT (GO:0046426)	0.12082	0.254216	0	0	3.64343	7.70021	PPP2CA;PTPN2
GO_Biological_Process_2021	negative regulation of transcription regulatory region DNA binding (GO:2000678)	0.12082	0.254216	0	0	3.64343	7.70021	DDIT3;GATA1
GO_Biological_Process_2021	nucleotide catabolic process (GO:0009166)	0.12082	0.254216	0	0	3.64343	7.70021	NT5E;GPX1
GO_Biological_Process_2021	regulation of ATP biosynthetic process (GO:2001169)	0.12082	0.254216	0	0	3.64343	7.70021	PARP1;PPARA
GO_Biological_Process_2021	regulation of cellular carbohydrate metabolic process (GO:0010675)	0.12082	0.254216	0	0	3.64343	7.70021	ADIPOQ;RORC
GO_Biological_Process_2021	regulation of ceramide biosynthetic process (GO:2000303)	0.12082	0.254216	0	0	3.64343	7.70021	PRKCD;TNF
GO_Biological_Process_2021	regulation of interleukin-1 production (GO:0032652)	0.12082	0.254216	0	0	3.64343	7.70021	IL10;HMGB1
GO_Biological_Process_2021	regulation of leukocyte activation (GO:0002694)	0.12082	0.254216	0	0	3.64343	7.70021	LYN;LCK
GO_Biological_Process_2021	regulation of systemic arterial blood pressure by hormone (GO:0001990)	0.12082	0.254216	0	0	3.64343	7.70021	NOS3;CORIN
GO_Biological_Process_2021	resolution of meiotic recombination intermediates (GO:0000712)	0.12082	0.254216	0	0	3.64343	7.70021	TOP2A;TOP2B
GO_Biological_Process_2021	serine family amino acid metabolic process (GO:0009069)	0.12082	0.254216	0	0	3.64343	7.70021	SEPSECS;PSPH
GO_Biological_Process_2021	sphingolipid catabolic process (GO:0030149)	0.12082	0.254216	0	0	3.64343	7.70021	SGPL1;GLA
GO_Biological_Process_2021	sympathetic nervous system development (GO:0048485)	0.12082	0.254216	0	0	3.64343	7.70021	CTNNB1;GATA3
GO_Biological_Process_2021	establishment of protein localization to membrane (GO:0090150)	0.124985	0.262841	0	0	1.96446	4.08521	NPC1;ARL6;EGFR;RAB11A;RAB11B
GO_Biological_Process_2021	mitotic nuclear membrane organization (GO:0101024)	0.126201	0.264835	0	0	2.17259	4.497	PPP2CA;CCNB2;LMNA;EMD
GO_Biological_Process_2021	mitotic nuclear membrane reassembly (GO:0007084)	0.126201	0.264835	0	0	2.17259	4.497	PPP2CA;CCNB2;LMNA;EMD
GO_Biological_Process_2021	regulation of axonogenesis (GO:0050770)	0.126201	0.264835	0	0	2.17259	4.497	GSK3B;MAG;PTEN;RHOA
GO_Biological_Process_2021	regulation of substrate adhesion-dependent cell spreading (GO:1900024)	0.126201	0.264835	0	0	2.17259	4.497	CDC42;ILK;RAC3;RAC1
GO_Biological_Process_2021	bile acid metabolic process (GO:0008206)	0.127496	0.266987	0	0	2.55166	5.25557	AMACR;NPC1;HSD17B10
GO_Biological_Process_2021	positive regulation of histone modification (GO:0031058)	0.127496	0.266987	0	0	2.55166	5.25557	SDR16C5;RPS6KA5;BRCA1
GO_Biological_Process_2021	signal transduction by p53 class mediator (GO:0072331)	0.127496	0.266987	0	0	2.55166	5.25557	TP53;BOK;BATF
GO_Biological_Process_2021	vasculogenesis (GO:0001570)	0.127496	0.266987	0	0	2.55166	5.25557	SPRED1;TGFB1;VEGFA
GO_Biological_Process_2021	regulation of transcription, DNA-templated (GO:0006355)	0.128559	0.269072	0	0	1.14329	2.34529	RB1;CSF2;GMNN;RORC;ILK;AHR;BRCA1;HMGB1;NR3C1;TNF;IKZF5;PPP3CB;RPS6KA5;TRPS1;RPS6KA1;AKT1;SUPT20H;NKX3-1;KCNH2;IL10;MAP2K1;EED;ADIPOQ;DYRK1A;RHOG;RHOH;MITF;SAFB;NR5A1;AR;PPM1A;PTP4A3;KAT2A;DDIT3;BIRC5;PPARG;MAPRE3;ERG;PPARA;TP53;SKAP1;PPARD;BLM;PCNA;KMT2A;CBFB;HDAC1;TMPRSS6;FOXG1;NR1I2;CEBPG;GATA6;GATA5;TWIST1;GATA4;GATA3;GATA2;HIF1A;GATA1;EGFR;FOXO1;PPM1F;RELA;INS;PPP2CA;CDC45;RXRA;ERBB2;SAFB2;E2…
GO_Biological_Process_2021	toll-like receptor signaling pathway (GO:0002224)	0.130157	0.272271	0	0	1.8032	3.67675	CASP8;MAPKAPK2;NR1H4;PIK3C3;HMGB1;TAB1
GO_Biological_Process_2021	regulation of hematopoietic stem cell differentiation (GO:1902036)	0.130546	0.27294	0	0	1.93459	3.93889	CBFB;KMT2A;GATA3;GATA2;GATA1
GO_Biological_Process_2021	defense response to virus (GO:0051607)	0.131498	0.274786	0	0	1.63585	3.31876	IL6;PTPRC;APOBEC3G;IFNB1;BCL2;AZU1;RELA;BCL2L1
GO_Biological_Process_2021	cell surface receptor signaling pathway involved in heart development (GO:0061311)	0.133646	0.276216	0	0	3.40035	6.84342	TGFB1;NOG
GO_Biological_Process_2021	cellular biogenic amine biosynthetic process (GO:0042401)	0.133646	0.276216	0	0	3.40035	6.84342	DDC;HDC
GO_Biological_Process_2021	copper ion homeostasis (GO:0055070)	0.133646	0.276216	0	0	3.40035	6.84342	APP;ARF1
GO_Biological_Process_2021	DNA biosynthetic process (GO:0071897)	0.133646	0.276216	0	0	3.40035	6.84342	POLL;POLH
GO_Biological_Process_2021	DNA replication checkpoint signaling (GO:0000076)	0.133646	0.276216	0	0	3.40035	6.84342	CDC45;NAE1
GO_Biological_Process_2021	epithelial cell morphogenesis (GO:0003382)	0.133646	0.276216	0	0	3.40035	6.84342	RAB25;MET
GO_Biological_Process_2021	mesenchyme morphogenesis (GO:0072132)	0.133646	0.276216	0	0	3.40035	6.84342	NOS3;NOG
GO_Biological_Process_2021	negative regulation of amyloid-beta formation (GO:1902430)	0.133646	0.276216	0	0	3.40035	6.84342	ROCK1;PIN1
GO_Biological_Process_2021	negative regulation of ATP metabolic process (GO:1903579)	0.133646	0.276216	0	0	3.40035	6.84342	PARP1;PPARA
GO_Biological_Process_2021	negative regulation of ATPase activity (GO:0032780)	0.133646	0.276216	0	0	3.40035	6.84342	ATP5IF1;TP53
GO_Biological_Process_2021	negative regulation of cell aging (GO:0090344)	0.133646	0.276216	0	0	3.40035	6.84342	MAP3K3;TWIST1
GO_Biological_Process_2021	pharyngeal system development (GO:0060037)	0.133646	0.276216	0	0	3.40035	6.84342	NOG;GATA3
GO_Biological_Process_2021	phosphate ion transport (GO:0006817)	0.133646	0.276216	0	0	3.40035	6.84342	SLC25A10;SLC25A11
GO_Biological_Process_2021	positive regulation of stem cell differentiation (GO:2000738)	0.133646	0.276216	0	0	3.40035	6.84342	NUDT21;GATA4
GO_Biological_Process_2021	positive regulation of stem cell proliferation (GO:2000648)	0.133646	0.276216	0	0	3.40035	6.84342	PTPRC;THPO
GO_Biological_Process_2021	regulation of Arp2/3 complex-mediated actin nucleation (GO:0034315)	0.133646	0.276216	0	0	3.40035	6.84342	NCKAP1;ARF1
GO_Biological_Process_2021	regulation of cardiac muscle contraction by regulation of the release of sequestered calcium ion (GO:0010881)	0.133646	0.276216	0	0	3.40035	6.84342	FKBP1B;CALM2
GO_Biological_Process_2021	regulation of Golgi organization (GO:1903358)	0.133646	0.276216	0	0	3.40035	6.84342	MAP2K1;MAPK1
GO_Biological_Process_2021	regulation of steroid biosynthetic process (GO:0050810)	0.133646	0.276216	0	0	3.40035	6.84342	NR5A1;NR1H4
GO_Biological_Process_2021	regulation of transferase activity (GO:0051338)	0.133646	0.276216	0	0	3.40035	6.84342	BAG5;ATM
GO_Biological_Process_2021	vasculature development (GO:0001944)	0.133646	0.276216	0	0	3.40035	6.84342	PDGFRA;PIK3CA
GO_Biological_Process_2021	cell-substrate junction assembly (GO:0007044)	0.136132	0.280066	0	0	2.46922	4.92395	SRC;FN1;RHOD
GO_Biological_Process_2021	histone lysine methylation (GO:0034968)	0.136132	0.280066	0	0	2.46922	4.92395	KMT2A;EHMT2;ASH2L
GO_Biological_Process_2021	positive regulation of calcium ion transport into cytosol (GO:0010524)	0.136132	0.280066	0	0	2.46922	4.92395	PLA2G1B;PDPK1;F2
GO_Biological_Process_2021	positive regulation of epidermal growth factor receptor signaling pathway (GO:0045742)	0.136132	0.280066	0	0	2.46922	4.92395	EGF;AKT1;MMP9
GO_Biological_Process_2021	positive regulation of release of sequestered calcium ion into cytosol (GO:0051281)	0.136132	0.280066	0	0	2.46922	4.92395	PDPK1;F2;CALM2
GO_Biological_Process_2021	regulation of glucose metabolic process (GO:0010906)	0.136132	0.280066	0	0	2.46922	4.92395	ADIPOQ;RORC;AKT1
GO_Biological_Process_2021	regulation of transmembrane transport (GO:0034762)	0.136132	0.280066	0	0	2.46922	4.92395	PIM1;BCL2;INS
GO_Biological_Process_2021	ventricular cardiac muscle tissue morphogenesis (GO:0055010)	0.136132	0.280066	0	0	2.46922	4.92395	FKBP1A;TGFB1;NOG
GO_Biological_Process_2021	cytoskeleton-dependent cytokinesis (GO:0061640)	0.136216	0.280066	0	0	1.90562	3.79888	ROCK1;ROCK2;PLK1;RHOA;RHOB
GO_Biological_Process_2021	positive regulation of secretion by cell (GO:1903532)	0.136216	0.280066	0	0	1.90562	3.79888	RAB2B;TGFB1;ATP6AP1;PLA2G1B;EZR
GO_Biological_Process_2021	regulation of macromolecule metabolic process (GO:0060255)	0.137732	0.283036	0	0	1.48862	2.95111	IL10;APP;ARF1;PTPRC;CDK4;ROCK2;TMPRSS4;CDK2;PIN1;AHR;HIF1A
GO_Biological_Process_2021	cardiac muscle tissue development (GO:0048738)	0.139715	0.286666	0	0	2.0837	4.10102	NPPA;GATA6;GATA5;GATA4
GO_Biological_Process_2021	heart morphogenesis (GO:0003007)	0.139715	0.286666	0	0	2.0837	4.10102	FKBP1A;NOS3;NOG;VEGFA
GO_Biological_Process_2021	positive regulation of B cell activation (GO:0050871)	0.139715	0.286666	0	0	2.0837	4.10102	IL6;PTPRC;SYK;BCL2
GO_Biological_Process_2021	regulation of immune response (GO:0050776)	0.141553	0.290287	0	0	1.513	2.95803	LYN;FGR;FKBP1A;CASP8;SYK;PLA2G1B;CSK;AHR;CXCL13;ICAM1
GO_Biological_Process_2021	neurotransmitter transport (GO:0006836)	0.141993	0.290738	0	0	1.8775	3.66483	STXBP3;STXBP1;GAD1;STXBP2;GAD2
GO_Biological_Process_2021	positive regulation of JNK cascade (GO:0046330)	0.141993	0.290738	0	0	1.8775	3.66483	APP;TAOK3;TRAF2;HMGB1;HRAS
GO_Biological_Process_2021	regulation of Rho protein signal transduction (GO:0035023)	0.141993	0.290738	0	0	1.8775	3.66483	RIT2;CUL3;RAC1;RAF1;MET
GO_Biological_Process_2021	cellular calcium ion homeostasis (GO:0006874)	0.143789	0.294262	0	0	1.59726	3.09774	YWHAE;FKBP1B;BCL2;BAX;PTH1R;F2;CTRC;ELANE
GO_Biological_Process_2021	negative regulation of organelle assembly (GO:1902116)	0.144961	0.294411	0	0	2.39193	4.61951	KAT2A;LRRK2;BRCA1
GO_Biological_Process_2021	positive regulation of cell cycle G1/S phase transition (GO:1902808)	0.144961	0.294411	0	0	2.39193	4.61951	CCND1;AKT1;EGFR
GO_Biological_Process_2021	positive regulation of immunoglobulin production (GO:0002639)	0.144961	0.294411	0	0	2.39193	4.61951	IL10;IL6;PTPRC
GO_Biological_Process_2021	regulation of autophagosome assembly (GO:2000785)	0.144961	0.294411	0	0	2.39193	4.61951	RALB;LRRK2;NPRL3
GO_Biological_Process_2021	regulation of postsynaptic membrane potential (GO:0060078)	0.144961	0.294411	0	0	2.39193	4.61951	GSK3B;LRRK2;AKT1
GO_Biological_Process_2021	interleukin-1-mediated signaling pathway (GO:0070498)	0.145213	0.294411	0	0	1.74145	3.36022	NFKBIA;MAP3K3;RPS6KA5;TAB1;RELA;NFKB1
GO_Biological_Process_2021	negative regulation of cell death (GO:0060548)	0.145213	0.294411	0	0	1.74145	3.36022	GSK3B;LRRK2;AKT1;TRAF2;GATA4;PRKD1
GO_Biological_Process_2021	cytoplasmic microtubule organization (GO:0031122)	0.14668	0.294411	0	0	2.04191	3.91946	MAPT;EZR;RHOA;RAB11A
GO_Biological_Process_2021	negative regulation of viral genome replication (GO:0045071)	0.14668	0.294411	0	0	2.04191	3.91946	APOBEC3G;IFNB1;TNF;MPHOSPH8
GO_Biological_Process_2021	nuclear membrane reassembly (GO:0031468)	0.14668	0.294411	0	0	2.04191	3.91946	PPP2CA;CCNB2;LMNA;EMD
GO_Biological_Process_2021	regulation of cyclin-dependent protein kinase activity (GO:1904029)	0.14668	0.294411	0	0	2.04191	3.91946	DIRAS3;CCNB2;BLM;CCND1
GO_Biological_Process_2021	3'-UTR-mediated mRNA stabilization (GO:0070935)	0.146759	0.294411	0	0	3.18767	6.117	MAPKAPK2;MAPK14
GO_Biological_Process_2021	cell migration involved in sprouting angiogenesis (GO:0002042)	0.146759	0.294411	0	0	3.18767	6.117	AKT1;VEGFA
GO_Biological_Process_2021	cellular response to dsRNA (GO:0071359)	0.146759	0.294411	0	0	3.18767	6.117	RALB;IFNB1
GO_Biological_Process_2021	cellular response to pH (GO:0071467)	0.146759	0.294411	0	0	3.18767	6.117	TRPV1;RAB11B
GO_Biological_Process_2021	chromatin disassembly (GO:0031498)	0.146759	0.294411	0	0	3.18767	6.117	NFE2;SUPT16H
GO_Biological_Process_2021	dendritic cell migration (GO:0036336)	0.146759	0.294411	0	0	3.18767	6.117	CXCR4;HMGB1
GO_Biological_Process_2021	DNA strand elongation involved in DNA replication (GO:0006271)	0.146759	0.294411	0	0	3.18767	6.117	PCNA;MCM7
GO_Biological_Process_2021	endothelial cell proliferation (GO:0001935)	0.146759	0.294411	0	0	3.18767	6.117	ANGPT4;HMOX1
GO_Biological_Process_2021	hyaluronan catabolic process (GO:0030214)	0.146759	0.294411	0	0	3.18767	6.117	TGFB1;GUSB
GO_Biological_Process_2021	negative regulation of cation transmembrane transport (GO:1904063)	0.146759	0.294411	0	0	3.18767	6.117	KCNH2;MMP9
GO_Biological_Process_2021	negative regulation of fibroblast proliferation (GO:0048147)	0.146759	0.294411	0	0	3.18767	6.117	EMD;TP53
GO_Biological_Process_2021	negative regulation of interleukin-8 production (GO:0032717)	0.146759	0.294411	0	0	3.18767	6.117	IL10;ELANE
GO_Biological_Process_2021	negative regulation of Rho protein signal transduction (GO:0035024)	0.146759	0.294411	0	0	3.18767	6.117	CUL3;MET
GO_Biological_Process_2021	negative regulation of signal transduction by p53 class mediator (GO:1901797)	0.146759	0.294411	0	0	3.18767	6.117	DYRK1A;TWIST1
GO_Biological_Process_2021	negative regulation of tumor necrosis factor-mediated signaling pathway (GO:0010804)	0.146759	0.294411	0	0	3.18767	6.117	ADIPOQ;PTPN2
GO_Biological_Process_2021	neuron maturation (GO:0042551)	0.146759	0.294411	0	0	3.18767	6.117	APP;RND1
GO_Biological_Process_2021	nucleosome disassembly (GO:0006337)	0.146759	0.294411	0	0	3.18767	6.117	NFE2;SUPT16H
GO_Biological_Process_2021	phosphatidylglycerol acyl-chain remodeling (GO:0036148)	0.146759	0.294411	0	0	3.18767	6.117	PLA2G1B;CRLS1
GO_Biological_Process_2021	positive regulation of cell cycle phase transition (GO:1901989)	0.146759	0.294411	0	0	3.18767	6.117	ATAD5;CUL3
GO_Biological_Process_2021	positive regulation of glial cell differentiation (GO:0045687)	0.146759	0.294411	0	0	3.18767	6.117	TGFB1;CXCR4
GO_Biological_Process_2021	positive regulation of phosphoprotein phosphatase activity (GO:0032516)	0.146759	0.294411	0	0	3.18767	6.117	PTPRC;CALM2
GO_Biological_Process_2021	prostanoid metabolic process (GO:0006692)	0.146759	0.294411	0	0	3.18767	6.117	HPGD;PTGS1
GO_Biological_Process_2021	regulation of cartilage development (GO:0061035)	0.146759	0.294411	0	0	3.18767	6.117	KAT2A;TRPS1
GO_Biological_Process_2021	regulation of chromosome segregation (GO:0051983)	0.146759	0.294411	0	0	3.18767	6.117	CSNK2A1;CSNK2A2
GO_Biological_Process_2021	regulation of telomere maintenance via telomere lengthening (GO:1904356)	0.146759	0.294411	0	0	3.18767	6.117	PARP1;ATM
GO_Biological_Process_2021	regulation of transcription by RNA polymerase I (GO:0006356)	0.146759	0.294411	0	0	3.18767	6.117	RASL11A;ERBB2
GO_Biological_Process_2021	response to axon injury (GO:0048678)	0.146759	0.294411	0	0	3.18767	6.117	P2RY12;DHFR
GO_Biological_Process_2021	RNA destabilization (GO:0050779)	0.146759	0.294411	0	0	3.18767	6.117	ROCK1;ROCK2
GO_Biological_Process_2021	cellular response to amino acid starvation (GO:0034198)	0.147875	0.296499	0	0	1.85019	3.53643	MIOS;RHEB;NPRL3;MAPK1;PRKD1
GO_Biological_Process_2021	tumor necrosis factor-mediated signaling pathway (GO:0033209)	0.150017	0.300641	0	0	1.64066	3.11234	NFKBIA;ILK;TRAF2;JAK2;TNF;TP53;RELA
GO_Biological_Process_2021	regulation of cardiac conduction (GO:1903779)	0.153777	0.306861	0	0	2.00177	3.74783	NPPA;FKBP1B;ITPR1;CORIN
GO_Biological_Process_2021	fibroblast growth factor receptor signaling pathway (GO:0008543)	0.153859	0.306861	0	0	1.82366	3.41338	SPRED1;RAB14;NOG;MAPK1;PTPN11
GO_Biological_Process_2021	nucleic acid phosphodiester bond hydrolysis (GO:0090305)	0.153859	0.306861	0	0	1.82366	3.41338	FEN1;PCNA;PARP1;ERCC1;POLK
GO_Biological_Process_2021	positive regulation of T cell activation (GO:0050870)	0.153859	0.306861	0	0	1.82366	3.41338	IL6;PTPRC;LCK;RHOH;GATA3
GO_Biological_Process_2021	regulation of hematopoietic progenitor cell differentiation (GO:1901532)	0.153859	0.306861	0	0	1.82366	3.41338	CBFB;KMT2A;GATA3;GATA2;GATA1
GO_Biological_Process_2021	response to amino acid starvation (GO:1990928)	0.153859	0.306861	0	0	1.82366	3.41338	MIOS;RHEB;NPRL3;MAPK1;PRKD1
GO_Biological_Process_2021	activation of adenylate cyclase activity (GO:0007190)	0.153973	0.306861	0	0	2.31933	4.33942	ACR;RAF1;TSHR
GO_Biological_Process_2021	endoderm formation (GO:0001706)	0.153973	0.306861	0	0	2.31933	4.33942	MMP2;FN1;MMP9
GO_Biological_Process_2021	positive regulation of cytokine-mediated signaling pathway (GO:0001961)	0.153973	0.306861	0	0	2.31933	4.33942	CASP1;CXCR4;HIF1A
GO_Biological_Process_2021	positive regulation of myeloid leukocyte differentiation (GO:0002763)	0.153973	0.306861	0	0	2.31933	4.33942	CASP8;PRKCA;TNF
GO_Biological_Process_2021	Wnt signaling pathway, calcium modulating pathway (GO:0007223)	0.153973	0.306861	0	0	2.31933	4.33942	PPP3CA;PPP3CB;CTNNB1
GO_Biological_Process_2021	establishment of protein localization to organelle (GO:0072594)	0.159942	0.314993	0	0	1.79788	3.29542	RALA;SYK;STAT3;AKT1;RAB11A
GO_Biological_Process_2021	cardiac atrium morphogenesis (GO:0003209)	0.16012	0.314993	0	0	3	5.49549	NOG;GATA4
GO_Biological_Process_2021	cellular response to interleukin-7 (GO:0098761)	0.16012	0.314993	0	0	3	5.49549	STAT3;JAK1
GO_Biological_Process_2021	cytoplasmic translational initiation (GO:0002183)	0.16012	0.314993	0	0	3	5.49549	EIF2S2;EIF3A
GO_Biological_Process_2021	folic acid metabolic process (GO:0046655)	0.16012	0.314993	0	0	3	5.49549	DHFR;MTRR
GO_Biological_Process_2021	glycerolipid catabolic process (GO:0046503)	0.16012	0.314993	0	0	3	5.49549	PRDX6;MGLL
GO_Biological_Process_2021	heart trabecula morphogenesis (GO:0061384)	0.16012	0.314993	0	0	3	5.49549	FKBP1A;NOG
GO_Biological_Process_2021	interleukin-7-mediated signaling pathway (GO:0038111)	0.16012	0.314993	0	0	3	5.49549	STAT3;JAK1
GO_Biological_Process_2021	negative regulation of amyloid precursor protein catabolic process (GO:1902992)	0.16012	0.314993	0	0	3	5.49549	ROCK1;PIN1
GO_Biological_Process_2021	negative regulation of cytokine production involved in inflammatory response (GO:1900016)	0.16012	0.314993	0	0	3	5.49549	F2;PPARA
[truncated: 1,964 more rows]
